# Supplementary material
Source: PubMed Central journal article supplement (PMC6641235)
Supplement: ao7b01856_si_001.pdf [file ao7b01856_si_001.pdf]

# Facile Route to the Synthesis of 1,3-Diazaheterocycle-Fused [1,2-*a*]Quinoline Derivatives via Cascade Reactions

Liang Chen,<sup>†</sup> Rong Huang,<sup>†</sup> Ling-Bin Kong,<sup>†</sup> Jun Lin<sup>\*†</sup> and Sheng-Jiao Yan<sup>\*†</sup>

<sup>†</sup>Key Laboratory of Medicinal Chemistry for Natural Resources (Yunnan University),  
Ministry of Education, School of Chemical Science and Technology, Yunnan  
University, Kunming, 650091, P. R. China

## Supporting Information

### Table of Contents

|                                                                                                                    |     |
|--------------------------------------------------------------------------------------------------------------------|-----|
| General Information.....                                                                                           | S4  |
| General Procedure for the Preparation of <b>3</b> and <b>4</b> .....                                               | S4  |
| Spectroscopic Data of <b>3</b> and <b>4</b> .....                                                                  | S5  |
| X-ray Structure and Data of <b>3bf</b> .....                                                                       | S25 |
| <b>Figure S1.</b> X-Ray crystal structure of <b>3bf</b> .....                                                      | S25 |
| <b>Figure S2.</b> <sup>1</sup> H NMR (300 MHz, DMSO- <i>d</i> <sub>6</sub> ) spectra of compound <b>3aa</b> .....  | S29 |
| <b>Figure S3.</b> <sup>13</sup> C NMR (75 MHz, DMSO- <i>d</i> <sub>6</sub> ) spectra of compound <b>3aa</b> .....  | S30 |
| <b>Figure S4.</b> <sup>1</sup> H NMR (300 MHz, DMSO- <i>d</i> <sub>6</sub> ) spectra of compound <b>3ab</b> .....  | S31 |
| <b>Figure S5.</b> <sup>13</sup> C NMR (75 MHz, DMSO- <i>d</i> <sub>6</sub> ) spectra of compound <b>3ab</b> .....  | S32 |
| <b>Figure S6.</b> <sup>1</sup> H NMR (300 MHz, DMSO- <i>d</i> <sub>6</sub> ) spectra of compound <b>3ac</b> .....  | S33 |
| <b>Figure S7.</b> <sup>13</sup> C NMR (75 MHz, DMSO- <i>d</i> <sub>6</sub> ) spectra of compound <b>3ac</b> .....  | S34 |
| <b>Figure S8.</b> <sup>1</sup> H NMR (300 MHz, DMSO- <i>d</i> <sub>6</sub> ) spectra of compound <b>3ad</b> .....  | S35 |
| <b>Figure S9.</b> <sup>13</sup> C NMR (75 MHz, DMSO- <i>d</i> <sub>6</sub> ) spectra of compound <b>3ad</b> .....  | S36 |
| <b>Figure S10.</b> <sup>1</sup> H NMR (300 MHz, DMSO- <i>d</i> <sub>6</sub> ) spectra of compound <b>3ae</b> ..... | S37 |
| <b>Figure S11.</b> <sup>13</sup> C NMR (75 MHz, DMSO- <i>d</i> <sub>6</sub> ) spectra of compound <b>3ae</b> ..... | S38 |
| <b>Figure S12.</b> <sup>1</sup> H NMR (300 MHz, DMSO- <i>d</i> <sub>6</sub> ) spectra of compound <b>3af</b> ..... | S39 |
| <b>Figure S13.</b> <sup>13</sup> C NMR (75 MHz, DMSO- <i>d</i> <sub>6</sub> ) spectra of compound <b>3af</b> ..... | S40 |
| <b>Figure S14.</b> <sup>1</sup> H NMR (300 MHz, DMSO- <i>d</i> <sub>6</sub> ) spectra of compound <b>3ag</b> ..... | S41 |
| <b>Figure S15.</b> <sup>13</sup> C NMR (75 MHz, DMSO- <i>d</i> <sub>6</sub> ) spectra of compound <b>3ag</b> ..... | S42 |
| <b>Figure S16.</b> <sup>1</sup> H NMR (300 MHz, DMSO- <i>d</i> <sub>6</sub> ) spectra of compound <b>3ah</b> ..... | S43 |
| <b>Figure S17.</b> <sup>13</sup> C NMR (75 MHz, DMSO- <i>d</i> <sub>6</sub> ) spectra of compound <b>3ah</b> ..... | S44 |
| <b>Figure S18.</b> <sup>1</sup> H NMR (300 MHz, DMSO- <i>d</i> <sub>6</sub> ) spectra of compound <b>3ai</b> ..... | S45 |
| <b>Figure S19.</b> <sup>13</sup> C NMR (75 MHz, DMSO- <i>d</i> <sub>6</sub> ) spectra of compound <b>3ai</b> ..... | S46 |
| <b>Figure S20.</b> <sup>1</sup> H NMR (300 MHz, DMSO- <i>d</i> <sub>6</sub> ) spectra of compound <b>3aj</b> ..... | S47 |
| <b>Figure S21.</b> <sup>13</sup> C NMR (75 MHz, DMSO- <i>d</i> <sub>6</sub> ) spectra of compound <b>3aj</b> ..... | S48 |

|                    |                                                                                  |     |
|--------------------|----------------------------------------------------------------------------------|-----|
| <b>Figure S22.</b> | $^1\text{H}$ NMR (300 MHz, DMSO- $d_6$ ) spectra of compound <b>3ak</b> .....    | S49 |
| <b>Figure S23.</b> | $^{13}\text{C}$ NMR (75 MHz, DMSO- $d_6$ ) spectra of compound <b>3ak</b> .....  | S50 |
| <b>Figure S24.</b> | $^1\text{H}$ NMR (300 MHz, DMSO- $d_6$ ) spectra of compound <b>3al</b> .....    | S51 |
| <b>Figure S25.</b> | $^{13}\text{C}$ NMR (75 MHz, DMSO- $d_6$ ) spectra of compound <b>3al</b> .....  | S52 |
| <b>Figure S26.</b> | $^1\text{H}$ NMR (300 MHz, DMSO- $d_6$ ) spectra of compound <b>3am</b> .....    | S53 |
| <b>Figure S27.</b> | $^{13}\text{C}$ NMR (75 MHz, DMSO- $d_6$ ) spectra of compound <b>3am</b> .....  | S54 |
| <b>Figure S28.</b> | $^1\text{H}$ NMR (300 MHz, DMSO- $d_6$ ) spectra of compound <b>3an</b> .....    | S55 |
| <b>Figure S29.</b> | $^{13}\text{C}$ NMR (75 MHz, DMSO- $d_6$ ) spectra of compound <b>3an</b> .....  | S56 |
| <b>Figure S30.</b> | $^1\text{H}$ NMR (300 MHz, DMSO- $d_6$ ) spectra of compound <b>3ao</b> .....    | S57 |
| <b>Figure S31.</b> | $^{13}\text{C}$ NMR (75 MHz, DMSO- $d_6$ ) spectra of compound <b>3ao</b> .....  | S58 |
| <b>Figure S32.</b> | $^1\text{H}$ NMR (300 MHz, DMSO- $d_6$ ) spectra of compound <b>3ap</b> .....    | S59 |
| <b>Figure S33.</b> | $^{13}\text{C}$ NMR (75 MHz, DMSO- $d_6$ ) spectra of compound <b>3ap</b> .....  | S60 |
| <b>Figure S34.</b> | $^1\text{H}$ NMR (300 MHz, DMSO- $d_6$ ) spectra of compound <b>3ba</b> .....    | S61 |
| <b>Figure S35.</b> | $^{13}\text{C}$ NMR (75 MHz, DMSO- $d_6$ ) spectra of compound <b>3ba</b> .....  | S62 |
| <b>Figure S36.</b> | $^1\text{H}$ NMR (500 MHz, DMSO- $d_6$ ) spectra of compound <b>3bb</b> .....    | S63 |
| <b>Figure S37.</b> | $^{13}\text{C}$ NMR (125 MHz, DMSO- $d_6$ ) spectra of compound <b>3bb</b> ..... | S64 |
| <b>Figure S38.</b> | $^1\text{H}$ NMR (400 MHz, DCCl $_3$ ) spectra of compound <b>3bc</b> .....      | S65 |
| <b>Figure S39.</b> | $^{13}\text{C}$ NMR (100 MHz, DCCl $_3$ ) spectra of compound <b>3bc</b> .....   | S66 |
| <b>Figure S40.</b> | $^1\text{H}$ NMR (300 MHz, DMSO- $d_6$ ) spectra of compound <b>3bd</b> .....    | S67 |
| <b>Figure S41.</b> | $^{13}\text{C}$ NMR (75 MHz, DMSO- $d_6$ ) spectra of compound <b>3bd</b> .....  | S68 |
| <b>Figure S42.</b> | $^1\text{H}$ NMR (300 MHz, DMSO- $d_6$ ) spectra of compound <b>3be</b> .....    | S69 |
| <b>Figure S43.</b> | $^{13}\text{C}$ NMR (75 MHz, DMSO- $d_6$ ) spectra of compound <b>3be</b> .....  | S70 |
| <b>Figure S44.</b> | $^1\text{H}$ NMR (500 MHz, DMSO- $d_6$ ) spectra of compound <b>3bf</b> .....    | S71 |
| <b>Figure S45.</b> | $^{13}\text{C}$ NMR (125 MHz, DMSO- $d_6$ ) spectra of compound <b>3bf</b> ..... | S72 |
| <b>Figure S46.</b> | $^1\text{H}$ NMR (500 MHz, DMSO- $d_6$ ) spectra of compound <b>3bg</b> .....    | S73 |
| <b>Figure S47.</b> | $^{13}\text{C}$ NMR (125 MHz, DMSO- $d_6$ ) spectra of compound <b>3bg</b> ..... | S74 |
| <b>Figure S48.</b> | $^1\text{H}$ NMR (500 MHz, DMSO- $d_6$ ) spectra of compound <b>3bh</b> .....    | S75 |
| <b>Figure S49.</b> | $^{13}\text{C}$ NMR (125 MHz, DMSO- $d_6$ ) spectra of compound <b>3bh</b> ..... | S76 |
| <b>Figure S50.</b> | $^1\text{H}$ NMR (300 MHz, DMSO- $d_6$ ) spectra of compound <b>3bi</b> .....    | S77 |
| <b>Figure S51.</b> | $^{13}\text{C}$ NMR (75 MHz, DMSO- $d_6$ ) spectra of compound <b>3bi</b> .....  | S78 |
| <b>Figure S52.</b> | $^1\text{H}$ NMR (300 MHz, DMSO- $d_6$ ) spectra of compound <b>3bj</b> .....    | S79 |
| <b>Figure S53.</b> | $^{13}\text{C}$ NMR (75 MHz, DMSO- $d_6$ ) spectra of compound <b>3bj</b> .....  | S80 |
| <b>Figure S54.</b> | $^1\text{H}$ NMR (500 MHz, DMSO- $d_6$ ) spectra of compound <b>3bk</b> .....    | S81 |
| <b>Figure S55.</b> | $^{13}\text{C}$ NMR (125 MHz, DMSO- $d_6$ ) spectra of compound <b>3bk</b> ..... | S82 |
| <b>Figure S56.</b> | $^1\text{H}$ NMR (500 MHz, DMSO- $d_6$ ) spectra of compound <b>3bl</b> .....    | S83 |
| <b>Figure S57.</b> | $^{13}\text{C}$ NMR (125 MHz, DMSO- $d_6$ ) spectra of compound <b>3bl</b> ..... | S84 |
| <b>Figure S58.</b> | $^1\text{H}$ NMR (500 MHz, DMSO- $d_6$ ) spectra of compound <b>3bm</b> .....    | S85 |
| <b>Figure S59.</b> | $^{13}\text{C}$ NMR (125 MHz, DMSO- $d_6$ ) spectra of compound <b>3bm</b> ..... | S86 |
| <b>Figure S60.</b> | $^1\text{H}$ NMR (300 MHz, DMSO- $d_6$ ) spectra of compound <b>3bn</b> .....    | S87 |
| <b>Figure S61.</b> | $^{13}\text{C}$ NMR (75 MHz, DMSO- $d_6$ ) spectra of compound <b>3bn</b> .....  | S88 |
| <b>Figure S62.</b> | $^1\text{H}$ NMR (500 MHz, DMSO- $d_6$ ) spectra of compound <b>3ca</b> .....    | S89 |
| <b>Figure S63.</b> | $^{13}\text{C}$ NMR (125 MHz, DMSO- $d_6$ ) spectra of compound <b>3ca</b> ..... | S90 |
| <b>Figure S64.</b> | $^{19}\text{F}$ NMR (565 MHz, DMSO- $d_6$ ) spectra of compound <b>3ca</b> ..... | S91 |
| <b>Figure S65.</b> | $^1\text{H}$ NMR (600 MHz, DMSO- $d_6$ ) spectra of compound <b>3cb</b> .....    | S92 |

|                                   |                                                                                              |      |
|-----------------------------------|----------------------------------------------------------------------------------------------|------|
| <b>Figure S66.</b>                | $^{13}\text{C}$ NMR (150 MHz, DMSO- $d_6$ ) spectra of compound <b>3cb</b> .....             | S93  |
| <b>Figure S67.</b>                | $^1\text{H}$ NMR (600 MHz, DMSO- $d_6$ ) spectra of compound <b>3cc</b> .....                | S94  |
| <b>Figure S68.</b>                | $^{13}\text{C}$ NMR (150 MHz, DMSO- $d_6$ ) spectra of compound <b>3cc</b> .....             | S95  |
| <b>Figure S69.</b>                | $^1\text{H}$ NMR (500 MHz, DMSO- $d_6$ ) spectra of compound <b>3cd</b> .....                | S96  |
| <b>Figure S70.</b>                | $^{13}\text{C}$ NMR (125 MHz, DMSO- $d_6$ ) spectra of compound <b>3cd</b> .....             | S97  |
| <b>Figure S71.</b>                | $^1\text{H}$ NMR (500 MHz, DMSO- $d_6$ ) spectra of compound <b>3ce</b> .....                | S98  |
| <b>Figure S72.</b>                | $^{13}\text{C}$ NMR (125MHz, DMSO- $d_6$ ) spectra of compound <b>3ce</b> .....              | S99  |
| <b>Figure S73.</b>                | $^1\text{H}$ NMR (300 MHz, DMSO- $d_6$ ) spectra of compound <b>3cf</b> .....                | S100 |
| <b>Figure S74.</b>                | $^{13}\text{C}$ NMR (75 MHz, DMSO- $d_6$ ) spectra of compound <b>3cf</b> .....              | S101 |
| <b>Figure S75.</b>                | $^1\text{H}$ NMR (600 MHz, DMSO- $d_6$ ) spectra of compound <b>3cg</b> .....                | S102 |
| <b>Figure S76.</b>                | $^{13}\text{C}$ NMR (150 MHz, DMSO- $d_6$ ) spectra of compound <b>3cg</b> .....             | S103 |
| <b>Figure S77.</b>                | $^1\text{H}$ NMR (500 MHz, DMSO- $d_6$ ) spectra of compound <b>3ch</b> .....                | S104 |
| <b>Figure S78.</b>                | $^{13}\text{C}$ NMR (125 MHz, DMSO- $d_6$ ) spectra of compound <b>3ch</b> .....             | S105 |
| <b>Figure S79.</b>                | $^{19}\text{F}$ NMR (470 MHz, DMSO- $d_6$ ) spectra of compound <b>3ch</b> .....             | S106 |
| <b>Figure S80.</b>                | $^1\text{H}$ NMR (600 MHz, DMSO- $d_6$ + HClO $_4$ ) spectra of compound <b>3ci</b> .....    | S107 |
| <b>Figure S81.</b>                | $^{13}\text{C}$ NMR (150 MHz, DMSO- $d_6$ + HClO $_4$ ) spectra of compound <b>3ci</b> ..... | S108 |
| <b>Figure S82.</b>                | $^{19}\text{F}$ NMR (565 MHz, DMSO- $d_6$ + HClO $_4$ ) spectra of compound <b>3ci</b> ..... | S109 |
| <b>Figure S83.</b>                | $^1\text{H}$ NMR (600 MHz, DMSO- $d_6$ + HClO $_4$ ) spectra of compound <b>3cj</b> .....    | S110 |
| <b>Figure S84.</b>                | $^{13}\text{C}$ NMR (150 MHz, DMSO- $d_6$ + HClO $_4$ ) spectra of compound <b>3cj</b> ..... | S111 |
| <b>Figure S85.</b>                | $^1\text{H}$ NMR (600 MHz, DMSO- $d_6$ ) spectra of compound <b>3ck</b> .....                | S112 |
| <b>Figure S86.</b>                | $^{13}\text{C}$ NMR (150 MHz, DMSO- $d_6$ ) spectra of compound <b>3ck</b> .....             | S113 |
| <b>Figure S87.</b>                | $^1\text{H}$ NMR (300 MHz, DMSO- $d_6$ ) spectra of compound <b>3cl</b> .....                | S114 |
| <b>Figure S88.</b>                | $^{13}\text{C}$ NMR (75 MHz, DMSO- $d_6$ ) spectra of compound <b>3cl</b> .....              | S115 |
| <b>Figure S89.</b>                | $^1\text{H}$ NMR (500 MHz, DMSO- $d_6$ ) spectra of compound <b>3cm</b> .....                | S116 |
| <b>Figure S90.</b>                | $^{13}\text{C}$ NMR (125 MHz, DMSO- $d_6$ ) spectra of compound <b>3cm</b> .....             | S117 |
| <b>Figure S91.</b>                | $^1\text{H}$ NMR (600 MHz, DMSO- $d_6$ ) spectra of compound <b>3cn</b> .....                | S118 |
| <b>Figure S92.</b>                | $^{13}\text{C}$ NMR (150 MHz, DMSO- $d_6$ ) spectra of compound <b>3cn</b> .....             | S119 |
| <b>Figure S93.</b>                | $^1\text{H}$ NMR (500 MHz, DMSO- $d_6$ + DCCl $_3$ ) spectra of compound <b>4da</b> .....    | S120 |
| <b>Figure S94.</b>                | $^{13}\text{C}$ NMR (125 MHz, DMSO- $d_6$ + DCCl $_3$ ) spectra of compound <b>4da</b> ..... | S121 |
| <b>Figure S95.</b>                | $^{19}\text{F}$ NMR (471 MHz, DMSO- $d_6$ + DCCl $_3$ ) spectra of compound <b>4da</b> ..... | S122 |
| <b>Figure S96.</b>                | $^1\text{H}$ NMR (300 MHz, DMSO- $d_6$ + DCCl $_3$ ) spectra of compound <b>4db</b> .....    | S123 |
| <b>Figure S97.</b>                | $^{13}\text{C}$ NMR (75 MHz, DMSO- $d_6$ + DCCl $_3$ ) spectra of compound <b>4db</b> .....  | S124 |
| <b>Figure S98.</b>                | $^1\text{H}$ NMR (500 MHz, DMSO- $d_6$ + DCCl $_3$ ) spectra of compound <b>4dc</b> .....    | S125 |
| <b>Figure S99.</b>                | $^{13}\text{C}$ NMR (150 MHz, DMSO- $d_6$ + DCCl $_3$ ) spectra of compound <b>4dc</b> ..... | S126 |
| <b>Figure S100.</b>               | $^{19}\text{F}$ NMR (565 MHz, DMSO- $d_6$ + DCCl $_3$ ) spectra of compound <b>4dc</b> ..... | S127 |
| <b>Figure S101.</b>               | $^1\text{H}$ NMR (600 MHz, DMSO- $d_6$ ) spectra of compound <b>4dd</b> .....                | S128 |
| <b>Figure S102.</b>               | $^{13}\text{C}$ NMR (150 MHz, DMSO- $d_6$ ) spectra of compound <b>4dd</b> .....             | S129 |
| <b>Figure S103.</b>               | $^{19}\text{F}$ NMR (471 MHz, DMSO- $d_6$ + DCCl $_3$ ) spectra of compound <b>4dd</b> ..... | S130 |
| <b>Figure S104.</b>               | HPLC of intermediate <b>6</b> .....                                                          | S131 |
| <b>Figure S105.</b>               | HRMS of piperidine .....                                                                     | S132 |
| <b>Figure S106.</b>               | HRMS of compound <b>2d</b> .....                                                             | S133 |
| <b>Figure S107.</b>               | HRMS of intermediate <b>6</b> .....                                                          | S134 |
| <b>References and Notes</b> ..... | S135                                                                                         |      |

## General Information

All compounds were fully characterized by spectroscopic data. The NMR spectra were recorded on a Bruker DRX300 ( $^1\text{H}$ : 300 MHz,  $^{13}\text{C}$ : 75 MHz), a Bruker DRX400 ( $^1\text{H}$ : 400 MHz,  $^{13}\text{C}$ : 100 MHz), a Bruker DRX500 ( $^1\text{H}$ : 500 MHz,  $^{13}\text{C}$ : 125 MHz) and a Bruker DRX600 ( $^1\text{H}$ : 600 MHz,  $^{13}\text{C}$ : 150 MHz) with  $\text{DMSO-}d_6$  and  $\text{CDCl}_3$  as the solvents. The chemical shifts ( $\delta$ ) are expressed in parts per million relative to the residual deuterated solvent signal, and coupling constants ( $J$ ) are given in Hertz. IR spectra were recorded on a FT-IR Thermo Nicolet Avatar 360 using KBr pellet. The reactions were monitored by thin layer chromatography (TLC) using silica gel  $\text{GF}_{254}$ . The melting points were determined on XT-4A melting point apparatus and are uncorrected. HRMs were performed on an Agilent LC/Ms TOF instrument. All chemicals and solvents were used as received without further purification unless otherwise stated. X-ray diffraction was obtained by APEX DUO.

The materials **1a-d** were purchased from Aldrich Corporation Limited. HKAs **2** were prepared according to a procedure described in the literature.<sup>1-3</sup>

## General Procedure for the Preparation of 3 and 4

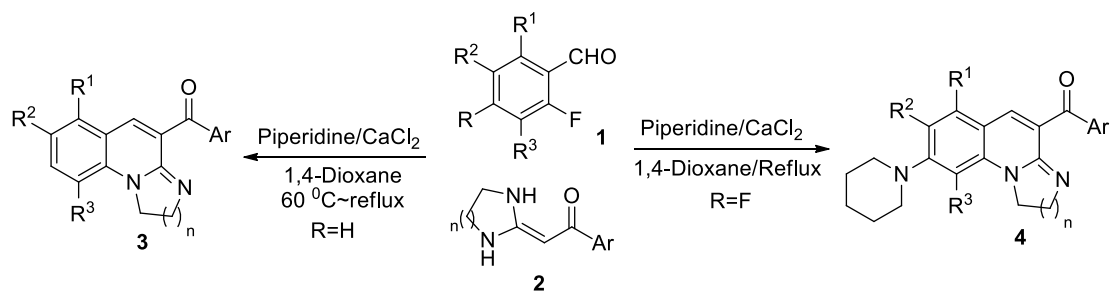

A mixture of 2-fluorobenzaldehyde **1** (1.1 mmol), HKAs **2** (1.0 mmol), and piperidine (1.5 mmol) are mixed by stirring at different temperatures (**1a** as starting material, the temperature of the reaction was  $60\text{ }^\circ\text{C}$ ; **1b** was  $75\text{ }^\circ\text{C}$ ; **1c** and **1d** (at reflux) in 1,4-dioxane (15 mL). When the solution of the reaction was clear, the  $\text{CaCl}_2$  (0.5 mmol) was added. After completion of the reaction, as indicated by TLC ( $\text{CH}_2\text{Cl}_2$ – $\text{EtOAc}$ , 1:10 v/v), the mixture was cooled to room temperature and filtered. The solid was then washed with small amount of ethanol (*ca.* 5 mL), and dissolved in  $\text{CHCl}_3$  (20 mL). Then, the organic phase was washed with saturated salt water (25 mL) and  $\text{NaHCO}_3$  (25 mL), dried over anhydrous  $\text{Na}_2\text{SO}_4$ , concentrated, and petroleum ether was added for recrystallization to obtain the pure products **3** or **4**.



## Spectroscopic Data of 3 and 4

### 4-(4'-Fluorophenyl)methanoneyl-7-nitro-1,2-dihydroimi-dazo[1,2-*a*]quinoline (3aa).

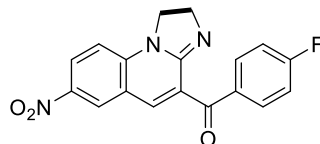

Yellow solid, m.p. 229–230 °C; IR (KBr): 3438, 1636, 1613, 1517, 1330, 1263, 1154, 853  $\text{cm}^{-1}$ ;  $^1\text{H}$  NMR (300 MHz,  $\text{DMSO-}d_6$ ) ( $\delta$ , ppm): 3.88–3.95 (m, 2H,  $\text{CH}_2\text{N}$ ), 4.01–4.08 (m, 2H,  $\text{NCH}_2$ ), 6.98 (d,  $J = 9.3$  Hz, 1H, ArH), 7.35 (t,  $J = 8.9$  Hz, 2H, ArH), 7.80 (s, 1H, CH), 7.97–8.02 (m, 2H, ArH), 8.24–8.28 (m, 1H, ArH), 8.45 (d,  $J = 2.4$  Hz, 1H, ArH);  $^{13}\text{C}$  NMR (75 MHz,  $\text{DMSO-}d_6$ ) ( $\delta$ , ppm): 45.5, 53.5, 112.4, 115.8 (d,  $J = 21.8$  Hz), 119.1, 124.9, 127.2, 129.4, 132.4, 132.6 (d,  $J = 9.8$  Hz), 136.2, 139.5, 143.9, 152.8, 165.4 (d,  $J = 251.3$  Hz), 190.9; HRMS (TOF  $\text{ES}^+$ ):  $m/z$  calcd for  $\text{C}_{18}\text{H}_{13}\text{FN}_3\text{O}_3$  [M+H], 338.0935; found, 338.0935.

### 4-(4'-Chlorophenyl)methanoneyl-7-nitro-1,2-dihydroimi-dazo[1,2-*a*]quinoline (3ab).

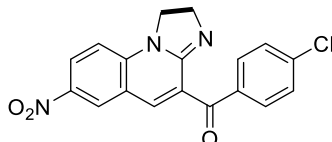

Yellow solid, m.p. 273–274 °C; IR (KBr): 2938, 1635, 1610, 1330, 1265, 1093, 871  $\text{cm}^{-1}$ ;  $^1\text{H}$  NMR (300 MHz,  $\text{DMSO-}d_6$ ) ( $\delta$ , ppm): 3.92–3.95 (m, 2H,  $\text{CH}_2\text{N}$ ), 4.02–4.05 (m, 2H,  $\text{NCH}_2$ ), 7.00 (d,  $J = 9.0$  Hz, 1H, ArH), 7.59 (d,  $J = 8.4$  Hz, 2H, ArH), 7.84 (s, 1H, CH), 7.91 (d,  $J = 8.7$  Hz, 2H, ArH), 8.26–8.29 (m, 1H, ArH), 8.48 (d,  $J = 2.7$  Hz, 1H, ArH);  $^{13}\text{C}$  NMR (75 MHz,  $\text{DMSO-}d_6$ ) ( $\delta$ , ppm): 45.5, 53.4, 112.5, 119.1, 125.1, 127.3, 128.8, 129.1, 131.4, 134.4, 136.8, 138.8, 139.6, 143.9, 152.8, 191.3; HRMS (TOF  $\text{ES}^+$ ):  $m/z$  calcd for  $\text{C}_{18}\text{H}_{13}\text{N}_3\text{O}_3\text{Cl}$  [M+H], 354.0640; found, 354.0638.

### 4-(4'-Bromophenyl)methanoneyl-7-nitro-1,2-dihydroimi-dazo[1,2-*a*]quinoline (3ac).

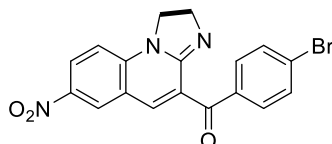

Yellow solid, m.p. 281–282 °C; IR (KBr): 3439, 2938, 1636, 1613, 1325, 1264, 1091, 868  $\text{cm}^{-1}$ ;  $^1\text{H}$  NMR (300 MHz,  $\text{DMSO-}d_6$ ) ( $\delta$ , ppm): 3.89–3.95 (m, 2H,  $\text{CH}_2\text{N}$ ), 4.02–4.09 (m, 2H,  $\text{NCH}_2$ ), 7.01(d,  $J = 9.0$  Hz, 1H,  $\text{ArH}$ ), 7.74 (d,  $J = 8.7$  Hz, 2H,  $\text{ArH}$ ), 7.83 (d,  $J = 6.9$  Hz, 2H,  $\text{ArH}$ ), 7.84 (s, 1H,  $\text{CH}$ ), 8.27–8.31 (m, 1H,  $\text{ArH}$ ), 8.49 (d,  $J = 2.4$  Hz, 1H,  $\text{ArH}$ );  $^{13}\text{C}$  NMR (75 MHz,  $\text{DMSO-}d_6$ ) ( $\delta$ , ppm): 45.5, 53.5, 112.5, 119.1, 125.1, 127.3, 128.1, 129.1, 131.4, 131.8, 134.8, 136.7, 139.6, 144.0, 152.8, 191.6; HRMS (TOF  $\text{ES}^+$ ):  $m/z$  calcd for  $\text{C}_{18}\text{H}_{13}\text{N}_3\text{O}_3\text{Br}[\text{M}+\text{H}]$ , 398.0134; found, 398.0137.

#### 4-(Phenyl)methanoneyl-7-nitro-1,2-dihydroimidazo[1,2-*a*]quinoline (3ad).

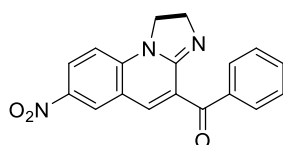

Yellow solid, m.p. 284–285 °C; IR (KBr): 3439, 2927, 1635, 1592, 1325, 1262, 1094, 729  $\text{cm}^{-1}$ ;  $^1\text{H}$  NMR (300 MHz,  $\text{DMSO-}d_6$ ) ( $\delta$ , ppm): 3.90–3.96 (m, 2H,  $\text{CH}_2\text{N}$ ), 4.03–4.09 (m, 2H,  $\text{NCH}_2$ ), 7.01(d,  $J = 9.3$  Hz, 1H,  $\text{ArH}$ ), 7.54 (t,  $J = 7.5$  Hz, 2H,  $\text{ArH}$ ), 7.69 (t,  $J = 7.4$  Hz, 1H,  $\text{ArH}$ ), 7.80 (s, 1H,  $\text{CH}$ ), 7.91 (d,  $J = 7.5$  Hz,  $\text{ArH}$ ), 8.27–8.30 (m, 1H,  $\text{ArH}$ ), 8.48 (d,  $J = 2.4$  Hz, 1H,  $\text{ArH}$ );  $^{13}\text{C}$  NMR (75 MHz,  $\text{DMSO-}d_6$ ) ( $\delta$ , ppm): 50.8, 58.8, 117.7, 124.4, 130.2, 132.4, 134.0, 134.8, 135.0, 139.2, 140.9, 141.1, 144.8, 149.2, 158.1, 197.7; HRMS (TOF  $\text{ES}^+$ ):  $m/z$  calcd for  $\text{C}_{18}\text{H}_{14}\text{N}_3\text{O}_3[\text{M}+\text{H}]$ , 320.1029; found, 320.1029.

#### 4-(*p*-Tolyl)methanoneyl-7-nitro-1,2-dihydroimidazo[1,2-*a*]quinoline (3ae).

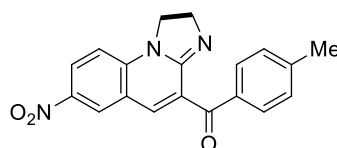

Yellow solid, m.p. 283–284 °C; IR (KBr): 3439, 2935, 1657, 1635, 1610, 1517, 1325, 1288, 1264, 1090, 870  $\text{cm}^{-1}$ ;  $^1\text{H}$  NMR (300 MHz,  $\text{DMSO-}d_6$ ) ( $\delta$ , ppm): 2.39 (s, 3H,  $\text{CH}_3$ ), 3.92–3.95 (m, 2H,  $\text{CH}_2\text{N}$ ), 4.02–4.05 (m, 2H,  $\text{NCH}_2$ ), 7.00 (d,  $J = 9.0$  Hz, 1H,  $\text{ArH}$ ), 7.34 (d,  $J = 7.8$  Hz, 2H,  $\text{ArH}$ ), 7.75 (s, 1H,  $\text{CH}$ ), 7.80 (d,  $J = 7.8$  Hz, 2H,  $\text{ArH}$ ), 8.27 (d,  $J = 8.7$  Hz, 1H,  $\text{ArH}$ ), 8.47 (s, 1H,  $\text{ArH}$ );  $^{13}\text{C}$  NMR (75 MHz,  $\text{DMSO-}d_6$ ) ( $\delta$ , ppm): 21.2, 45.5, 53.5, 112.3, 119.1, 124.8, 127.0, 129.3, 129.7, 129.9, 133.1, 135.5, 139.5, 143.8, 144.6, 152.8, 191.9; HRMS (TOF  $\text{ES}^+$ ):  $m/z$  calcd for  $\text{C}_{19}\text{H}_{16}\text{N}_3\text{O}_3[\text{M}+\text{H}]$ , 334.1186; found, 334.1186.

**4-(4'-Methoxyphenyl)methanoneyl-7-nitro-1,2-dihydroimidazo[1,2-*a*]quinoline (3af).**

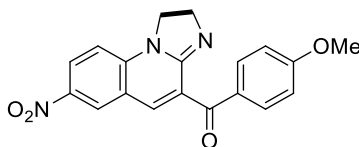

Yellow solid, m.p. 260–261 °C; IR (KBr): 1651, 1613, 1592, 1330, 1260, 1172, 585  $\text{cm}^{-1}$ ;  $^1\text{H}$  NMR (300 MHz,  $\text{DMSO-}d_6$ ) ( $\delta$ , ppm): 3.85 (s, 3H,  $\text{OCH}_3$ ), 3.89–3.96 (m, 2H,  $\text{CH}_2\text{N}$ ), 4.03–4.09 (m, 2H,  $\text{NCH}_2$ ), 7.00 (d,  $J = 9.3$  Hz, 1H,  $\text{ArH}$ ), 7.05 (d,  $J = 8.7$  Hz, 2H,  $\text{ArH}$ ), 7.72 (s, 1H,  $\text{CH}$ ), 7.88 (d,  $J = 8.7$  Hz, 2H,  $\text{ArH}$ ), 8.25–8.29 (m, 1H,  $\text{ArH}$ ), 8.46 (d,  $J = 2.4$  Hz, 1H,  $\text{ArH}$ );  $^{13}\text{C}$  NMR (75 MHz,  $\text{DMSO-}d_6$ ) ( $\delta$ , ppm): 45.5, 53.5, 55.6, 112.3, 114.0, 119.2, 124.7, 126.9, 128.4, 130.1, 132.0, 135.0, 139.5, 143.7, 152.9, 163.8, 190.7; HRMS (TOF  $\text{ES}^+$ ):  $m/z$  calcd for  $\text{C}_{19}\text{H}_{16}\text{N}_3\text{O}_4[\text{M}+\text{H}]$ , 350.1135; found, 350.1132.

**4-(Thiophen-2'-yl)methanoneyl-7-nitro-1,2-dihydroimidazo[1,2-*a*]quinoline (3ag).**

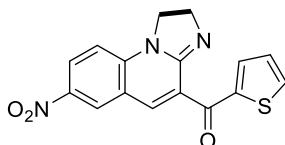

Orange solid, m.p. 274–275 °C; IR (KBr): 3076, 2975, 1641, 1589, 1410, 1324, 1262, 1054, 742  $\text{cm}^{-1}$ ;  $^1\text{H}$  NMR (300 MHz,  $\text{DMSO-}d_6$ ) ( $\delta$ , ppm): 3.97–4.00 (m, 2H,  $\text{CH}_2\text{N}$ ), 4.04–4.06 (m, 2H,  $\text{NCH}_2$ ), 7.00 (d,  $J = 9.0$  Hz, 1H,  $\text{ArH}$ ), 7.25–7.28 (m, 1H,  $\text{CH}$ ), 7.86 (s, 1H,  $\text{CH}$ ), 7.89–7.90 (m, 1H,  $\text{CH}$ ), 8.14–8.16 (m, 1H,  $\text{CH}$ ), 8.26–8.30 (m, 1H,  $\text{ArH}$ ), 8.48 (d,  $J = 2.4$  Hz, 1H,  $\text{ArH}$ );  $^{13}\text{C}$  NMR (75 MHz,  $\text{DMSO-}d_6$ ) ( $\delta$ , ppm): 45.6, 53.5, 112.4, 119.0, 125.0, 127.3, 129.0, 135.7, 136.6, 136.9, 139.5, 142.5, 143.9, 152.5, 184.1; HRMS (TOF  $\text{ES}^+$ ):  $m/z$  calcd for  $\text{C}_{16}\text{H}_{12}\text{N}_3\text{O}_3\text{S}[\text{M}+\text{H}]$ , 326.0593; found, 326.0595.

**5-(4'-Fluorophenyl)methanoneyl-8-nitro-2,3-dihydro-1H-pyrimido[1,2-*a*]quinoline (3ah).**

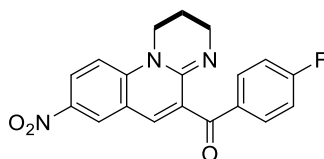

Yellow solid, m.p. 224–225 °C; IR (KBr): 2934, 1634, 1596, 1508, 1327, 1277, 907, 585  $\text{cm}^{-1}$ ;  $^1\text{H}$  NMR (300 MHz,  $\text{DMSO-}d_6$ ) ( $\delta$ , ppm): 1.90–1.92 (m, 2H,  $\text{CH}_2$ ),

3.27–3.31 (m, 2H, CH<sub>2</sub>N), 3.97–3.99 (m, 2H, NCH<sub>2</sub>), 7.30–7.42 (m, 3H, ArH), 7.63 (s, 1H, CH), 7.95–8.00 (m, 2H, ArH), 8.25–8.29 (m, 1H, ArH), 8.44(d, *J* = 2.4 Hz, 1H, ArH); <sup>13</sup>C NMR (75 MHz, DMSO-*d*<sub>6</sub>) (δ, ppm): 19.3, 42.9, 44.4, 112.4, 115.8 (d, *J* = 22.5), 119.5, 124.2, 125.8 130.8, 132.2 (d, *J* = 9.8 Hz), 132.7, 136.2, 140.4, 145.1, 146.7, 165.2 (d, *J* = 250.5 Hz), 192.5; HRMS (TOF ES<sup>+</sup>): *m/z* calcd for C<sub>19</sub>H<sub>15</sub>N<sub>3</sub>O<sub>3</sub>F[M+H], 352.1091; found, 352.1088.

**5-(4'-Chlorophenyl)methanoneyl-8-nitro-2,3-dihydro-1H-pyrimido[1,2-*a*]quinoline (3ai).**

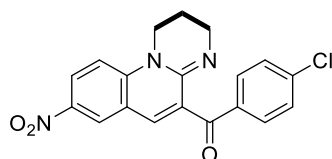

Yellow solid, m.p. 272–273 °C; IR (KBr): 2928, 1662, 1640, 1324, 1277, 1094, 899, 834 cm<sup>-1</sup>; <sup>1</sup>H NMR (300 MHz, DMSO-*d*<sub>6</sub>) (δ, ppm): 1.86–1.90 (m, 2H, CH<sub>2</sub>), 3.25–3.28 (m, 2H, CH<sub>2</sub>N), 3.92–3.96 (m, 2H, NCH<sub>2</sub>), 7.36 (d, *J* = 9.3 Hz, 1H, ArH), 7.59 (s, 1H, CH), 7.70 (d, *J* = 8.7 Hz, 2H, ArH), 7.89 (d, *J* = 8.4 Hz, 2H, ArH), 8.24–8.28 (m, 1H, ArH), 8.42 (d, *J* = 2.7 Hz, 1H, ArH); <sup>13</sup>C NMR (75 MHz, DMSO-*d*<sub>6</sub>) (δ, ppm): 19.4, 43.1, 44.3, 112.1, 119.4, 124.2, 125.8, 128.8 130.3, 130.9, 134.7, 136.7, 138.4, 140.2, 145.3, 146.5, 193.0; HRMS (TOF ES<sup>+</sup>): *m/z* calcd for C<sub>19</sub>H<sub>15</sub>N<sub>3</sub>O<sub>3</sub>Cl[M+H], 368.0796; found, 368.0795.

**5-(4'-Bromophenyl)methanoneyl-8-nitro-2,3-dihydro-1H-pyrimido[1,2-*a*]quinoline (3aj).**

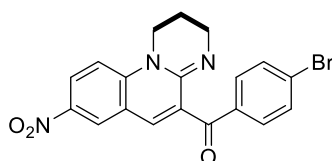

Yellow solid, m.p. 264–265 °C; IR (KBr): 2966, 1653, 1613, 1326, 1273, 743 cm<sup>-1</sup>; <sup>1</sup>H NMR (300 MHz, DMSO-*d*<sub>6</sub>) (δ, ppm): 1.86–1.90 (m, 2H, CH<sub>2</sub>), 3.25–3.28 (m, 2H, CH<sub>2</sub>N), 3.92–3.96 (m, 2H, NCH<sub>2</sub>), 7.36 (d, *J* = 9.3 Hz, 1H, ArH), 7.59 (s, 1H, CH), 7.70 (d, *J* = 8.7 Hz, 2H, ArH), 7.81 (d, *J* = 8.4 Hz, 2H, ArH), 8.24–8.28 (m, 1H, ArH), 8.42 (d, *J* = 2.7 Hz, 1H, ArH); <sup>13</sup>C NMR (75 MHz, DMSO-*d*<sub>6</sub>) (δ, ppm): 19.4, 43.1, 44.3, 112.1, 119.5, 124.2, 125.8, 127.6 130.3, 131.0, 131.8, 135.1, 136.7, 140.3, 145.3, 146.5, 193.2; HRMS (TOF ES<sup>+</sup>): *m/z* calcd for C<sub>19</sub>H<sub>15</sub>N<sub>3</sub>O<sub>3</sub>Br[M+H], 412.0291; found, 412.0291.

**5-(Phenyl)methanoneyl-8-nitro-2,3-dihydro-1H-pyrimido[1,2-a]quinoline**

**(3ak).**

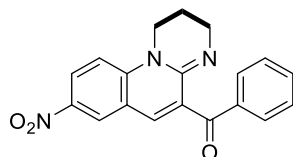

Yellow solid, m.p. 285–286 °C; IR (KBr): 2954, 2849, 1640, 1595, 1324, 1277, 1095, 904, 718 cm<sup>-1</sup>; <sup>1</sup>H NMR (300 MHz, DMSO-*d*<sub>6</sub>) (δ, ppm): 1.88 (m, 2H, CH<sub>2</sub>), 3.27 (m, 2H, CH<sub>2</sub>N), 3.95 (m, 2H, NCH<sub>2</sub>), 7.37 (d, *J* = 9.3 Hz, 1H, ArH), 7.51 (t, *J* = 7.5 Hz, 2H, ArH), 7.56 (s, 1H, CH), 7.64 (t, *J* = 7.1 Hz, 1H, ArH), 7.90 (d, *J* = 7.5 Hz, ArH), 8.27–8.25 (m, 1H, ArH), 8.42 (s, 1H, ArH); <sup>13</sup>C NMR (75 MHz, DMSO-*d*<sub>6</sub>) (δ, ppm): 19.4, 43.1, 44.3, 112.1, 119.5, 124.1, 125.6, 128.7, 129.1, 129.8, 133.6, 135.9, 137.2, 140.3, 145.2, 146.5, 194.0; HRMS (TOF ES<sup>+</sup>): *m/z* calcd for C<sub>19</sub>H<sub>16</sub>N<sub>3</sub>O<sub>3</sub>[M+H], 334.1186; found, 334.1186.

**5-(*p*-Tolyl)methanoneyl-8-nitro-2,3-dihydro-1H-pyrimido[1,2-a]quinoline**

**(3al).**

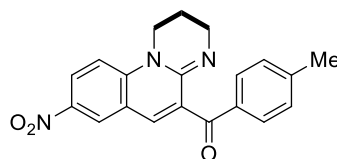

Yellow solid, m.p. 282–283 °C; IR (KBr): 2959, 1642, 1595, 1323, 1277, 1093, 904 cm<sup>-1</sup>; <sup>1</sup>H NMR (300 MHz, DMSO-*d*<sub>6</sub>) (δ, ppm): 1.86–1.89 (m, 2H, CH<sub>2</sub>), 2.37 (s, 3H, CH<sub>3</sub>), 3.26–3.29 (m, 2H, CH<sub>2</sub>N), 3.92–3.96 (m, 2H, NCH<sub>2</sub>), 7.30 (d, *J* = 8.1 Hz, 2H, ArH), 7.35 (d, *J* = 9.3 Hz, 1H, ArH), 7.51 (s, 1H, CH), 7.78 (d, *J* = 8.1 Hz, 2H, ArH), 8.22–8.26 (m, 1H, ArH), 8.40 (d, *J* = 2.7 Hz, 1H, ArH); <sup>13</sup>C NMR (75 MHz, DMSO-*d*<sub>6</sub>) (δ, ppm): 19.4, 21.2, 43.1, 44.3, 112.0, 119.5, 124.0, 125.6, 129.2, 129.2, 129.5, 133.5, 137.4, 140.2, 144.1, 145.2, 146.4, 193.5; HRMS (TOF ES<sup>+</sup>): *m/z* calcd for C<sub>20</sub>H<sub>18</sub>N<sub>3</sub>O<sub>3</sub>[M+H], 348.1342; found, 348.1341.

**5-(4'-Methoxyphenyl)methanoneyl-8-nitro-2,3-dihydro-1H-pyrimido[1,2-a]quinoline (3am).**

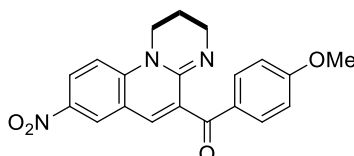

Yellow solid, m.p. 221–222 °C; IR (KBr): 2934, 1641, 1595, 1328, 1277, 1162, 986 cm<sup>-1</sup>; <sup>1</sup>H NMR (300 MHz, DMSO-*d*<sub>6</sub>) (δ, ppm): 1.87–1.90 (m, 2H, CH<sub>2</sub>),

3.27–3.30 (m, 2H, CH<sub>2</sub>N), 2.83 (s, 3H, OCH<sub>3</sub>), 3.92–3.96 (m, 2H, NCH<sub>2</sub>), 7.02 (d, *J* = 8.7 Hz, 2H, ArH), 7.35 (d, *J* = 9.3 Hz, 1H, ArH), 7.49 (s, 1H, CH), 7.85 (d, *J* = 8.7 Hz, 2H, ArH), 8.22–8.26 (m, 1H, ArH), 8.40 (d, *J* = 2.7 Hz, 1H, ArH); <sup>13</sup>C NMR (75 MHz, DMSO-*d*<sub>6</sub>) (δ, ppm): 19.4, 43.1, 44.3, 55.6, 112.0, 113.9, 119.6, 123.9, 125.5, 128.9, 129.2, 131.6, 137.5, 140.2, 145.2, 146.4, 163.4, 192.4; HRMS (TOF ES<sup>+</sup>): *m/z* calcd for C<sub>20</sub>H<sub>18</sub>N<sub>3</sub>O<sub>4</sub>[M+H], 364.1291; found, 364.1293.

**5-(Thiophen-2'-yl)methanoneyl-8-nitro-2,3-dihydro-1*H*-pyrimido[1,2-*a*]quinoline (3an).**

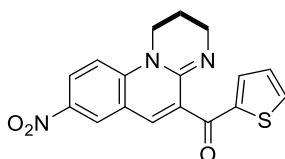

Yellow solid, m.p. 224–225 °C; IR (KBr): 2960, 1645, 1594, 1511, 1329, 1279, 1054, 737 cm<sup>-1</sup>; <sup>1</sup>H NMR (300 MHz, DMSO-*d*<sub>6</sub>) (δ, ppm): 1.89–1.92 (m, 2H, CH<sub>2</sub>), 3.31–3.35 (m, 2H, CH<sub>2</sub>N), 3.92–3.96 (m, 2H, NCH<sub>2</sub>), 7.20–7.23 (m, 1H, CH), 7.34(d, *J* = 9.3 Hz, 1H, ArH), 7.58 (s, 1H, CH), 7.77–7.79 (m, 1H, CH), 8.05–8.07 (m, 1H, CH), 8.22–8.40 (m, 1H, ArH), 8.40 (d, *J* = 2.7Hz, 1H, ArH); <sup>13</sup>C NMR (75 MHz, DMSO-*d*<sub>6</sub>) (δ, ppm): 19.4, 43.1, 44.4, 112.0, 119.4, 124.2, 125.8, 128.9, 129.7, 135.5, 135.8, 136.6, 140.2, 143.1, 145.3, 146.1, 186.1; HRMS (TOF ES<sup>+</sup>): *m/z* calcd for C<sub>17</sub>H<sub>14</sub>N<sub>3</sub>O<sub>3</sub>S[M+H], 340.0750; found, 340.0752.

**6-(4'-Chlorophenyl)methanoneyl-9-nitro-1,2,3,4-tetrahydro-[1,3]diazepino [1,2-*a*]quinoline (3ao).**

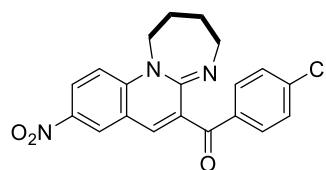

Yellow solid, m.p. 232–233 °C; IR (KBr): 2930, 1657, 1626, 1597, 1340, 1285, 1087, 840 cm<sup>-1</sup>; <sup>1</sup>H NMR (300 MHz, DMSO-*d*<sub>6</sub>) (δ, ppm): 1.78 (m, 2H, CH<sub>2</sub>), 2.04–2.07 (m, 2H, CH<sub>2</sub>), 3.62–3.66 (m, 2H, CH<sub>2</sub>N), 4.11–4.15 (m, 2H, NCH<sub>2</sub>), 7.38 (d, *J* = 9.3 Hz, 1H, ArH), 7.56 (d, *J* = 8.7 Hz, 2H, ArH), 7.62 (s, 1H, CH), 7.90 (d, *J* = 8.4 Hz, 2H, ArH), 8.22–8.26 (m, 1H, ArH), 8.45 (d, *J* = 2.7 Hz, 1H, ArH); <sup>13</sup>C NMR (75 MHz, DMSO-*d*<sub>6</sub>) (δ, ppm): 23.6, 25.0, 47.2, 49.2, 112.8, 120.0, 124.1, 125.6, 128.8, 130.6, 130.8, 134.8, 137.0, 138.2, 140.1, 146.9, 148.5, 192.9; HRMS (TOF ES<sup>+</sup>): *m/z* calcd for C<sub>20</sub>H<sub>17</sub>ClN<sub>3</sub>O<sub>3</sub>[M+H], 382.0953; found,

382.0952.

**6-(*p*-Tolyl)methanoneyl-9-nitro-1,2,3,4-tetrahydro-[1,3]diazepino[1,2-*a*]quinoline (3ap).**

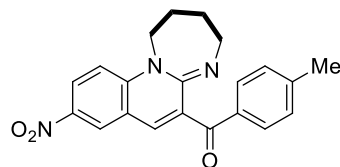

Yellow solid, m.p. 236–237 °C; IR (KBr): 1663, 1636, 1594, 1500, 1486, 1327, 1265, 1206, 1090, 861, 819  $\text{cm}^{-1}$ ;  $^1\text{H}$  NMR (300 MHz,  $\text{DMSO-}d_6$ ) ( $\delta$ , ppm): 1.79 (m, 2H,  $\text{CH}_2$ ), 2.04–2.08 (m, 2H,  $\text{CH}_2$ ), 3.63–3.66 (m, 2H,  $\text{CH}_2\text{N}$ ), 4.11–4.15 (m, 2H,  $\text{NCH}_2$ ), 7.31 (d,  $J = 8.1$  Hz, 1H, ArH), 7.37 (d,  $J = 9.3$  Hz, 2H, ArH), 7.54 (s, 1H, CH), 7.79 (d,  $J = 8.1$  Hz, 2H, ArH), 8.21–8.25 (m, 1H, ArH), 8.43 (d,  $J = 2.7$  Hz, 1H, ArH);  $^{13}\text{C}$  NMR (75 MHz,  $\text{DMSO-}d_6$ ) ( $\delta$ , ppm): 21.2, 23.6, 25.1, 47.2, 49.2, 112.8, 120.2, 123.9, 125.3, 129.1, 129.2, 129.7, 133.5, 137.8, 140.0, 143.9, 146.8, 148.5, 193.5; HRMS (TOF  $\text{ES}^+$ ):  $m/z$  calcd for  $\text{C}_{21}\text{H}_{20}\text{N}_3\text{O}_3[\text{M}+\text{H}]$ , 362.1499; found, 362.1500.

**4-(4'-Fluorophenyl)methanoneyl-7-(trifluoromethyl)-1,2-dihydroimidazo [1,2-*a*]quinoline (3ba).**

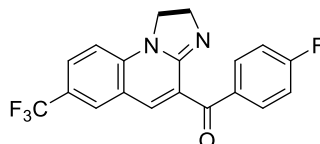

Yellow solid, m.p. 198–199 °C; IR (KBr): 3438, 1663, 1636, 1599, 1386, 1336, 1207, 1155, 1115, 1077, 998, 859, 610  $\text{cm}^{-1}$ ;  $^1\text{H}$  NMR (300 MHz,  $\text{DMSO-}d_6$ ) ( $\delta$ , ppm): 3.85–3.93 (m, 2H,  $\text{CH}_2\text{N}$ ), 3.98–4.04 (m, 2H,  $\text{NCH}_2$ ), 7.01 (d,  $J = 8.7$  Hz, 1H, ArH), 7.30–7.38 (m, 2H, ArH), 7.72 (s, 1H, CH), 7.72–7.76 (dd,  $J_1 = 9.0$  Hz,  $J_2 = 1.8$  Hz, 1H, ArH), 7.92 (d,  $J = 1.5$  Hz, 1H, ArH), 7.94–8.01 (m, 2H, ArH);  $^{13}\text{C}$  NMR (75 MHz,  $\text{DMSO-}d_6$ ) ( $\delta$ , ppm): 45.3, 53.3, 112.5, 115.8 (d,  $J_2 = 21.8$  Hz), 119.3, 119.8–120.7 (m), 124.4 (d,  $J_1 = 269.3$  Hz), 126.4, 128.2, 129.0, 132.5 (d,  $J_3 = 9.8$  Hz), 136.3, 142.1, 153.2, 165.3 (d,  $J_1 = 251.3$  Hz), 191.2; HRMS (TOF  $\text{ES}^+$ ):  $m/z$  calcd for  $\text{C}_{19}\text{H}_{13}\text{N}_2\text{OF}_4[\text{M}+\text{H}]$ , 361.0958; found, 361.0958.

**4-(4'-Chlorophenyl)methanoneyl-7-(trifluoromethyl)-1,2-dihydroimidazo [1,2-*a*]quinoline (3bb).**

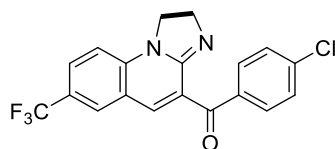

Yellow solid, m.p. 232–233 °C; IR (KBr): 3442, 1661, 1635, 1580, 1334, 1206, 1159, 1112, 1076, 997, 840, 519  $\text{cm}^{-1}$ ;  $^1\text{H}$  NMR (500 MHz, DMSO- $d_6$ ) ( $\delta$ , ppm): 3.87–3.91 (m, 2H,  $\text{CH}_2\text{N}$ ), 3.98–4.02 (m, 2H,  $\text{NCH}_2$ ), 7.02 (d,  $J = 8.6$  Hz, 1H,  $\text{ArH}$ ), 7.59 (d,  $J = 8.3$  Hz, 2H,  $\text{ArH}$ ), 7.75 (s, 1H,  $\text{ArH}$ ), 7.76 (s, 1H,  $\text{ArH}$ ), 7.90 (d,  $J = 8.5$  Hz, 2H,  $\text{ArH}$ ), 7.94 (s, 1H,  $\text{ArH}$ );  $^{13}\text{C}$  NMR (125 MHz, DMSO- $d_6$ ) ( $\delta$ , ppm): 45.7, 53.7, 112.9, 119.6, 120.5 (d,  $J_2 = 32.5$  Hz), 124.8 (d,  $J_1 = 270.0$  Hz), 126.9, 128.8, 129.1, 129.2, 131.7, 135.1, 137.2, 139.1, 142.6, 153.6, 192.0; HRMS (TOF  $\text{ES}^+$ ):  $m/z$  calcd for  $\text{C}_{19}\text{H}_{13}\text{N}_2\text{OF}_3\text{Cl}[\text{M}+\text{H}]$ , 377.0663; found, 377.0664.

**4-(4'-Bromophenyl)methanoneyl-7-(trifluoromethyl)-1,2-dihydroimidazo[1,2-*a*]quinoline (3bc).**

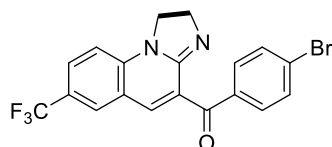

Yellow solid, m.p. 237–238 °C; IR (KBr): 1662, 1635, 1582, 1399, 1334, 1206, 1159, 1111, 1075, 996, 837, 765  $\text{cm}^{-1}$ ;  $^1\text{H}$  NMR (400 MHz,  $\text{DCCl}_3$ ) ( $\delta$ , ppm): 4.22–4.27 (t,  $J = 12.2$  Hz, 2H,  $\text{CH}_2\text{N}$ ), 4.35–4.42 (t,  $J = 12.4$  Hz, 2H,  $\text{NCH}_2$ ), 7.04 (d,  $J = 11.2$  Hz, 1H,  $\text{ArH}$ ), 7.66 (s, 1H,  $\text{CH}$ ), 7.82 (m, 2H,  $\text{ArH}$ ), 7.85–7.88 (m, 2H,  $\text{ArH}$ ), 8.02 (d,  $J = 10.0$  Hz, 2H,  $\text{ArH}$ );  $^{13}\text{C}$  NMR (125 MHz,  $\text{DCCl}_3$ ) ( $\delta$ , ppm): 45.8, 53.9, 111.9, 119.2, 122.5 (m), 125.3, 126.7, 128.6, 129.0, 129.2, 131.4, 131.9, 134.9, 138.1, 142.0, 154.0, 191.5; HRMS (TOF  $\text{ES}^+$ ):  $m/z$  calcd for  $\text{C}_{19}\text{H}_{13}\text{N}_2\text{OF}_3\text{Br}[\text{M}+\text{H}]$ , 421.0157; found, 421.0158.

**4-(Phenyl)methanoneyl-7-(trifluoromethyl)-1,2-dihydroimidazo[1,2-*a*]quinoline (3bd).**

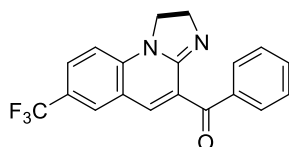

Yellow solid, m.p. 212–213 °C; IR (KBr): 1666, 1635, 1578, 1387, 1333, 1204, 1160, 1117, 1073, 996, 817, 519  $\text{cm}^{-1}$ ;  $^1\text{H}$  NMR (300 MHz, DMSO- $d_6$ ) ( $\delta$ , ppm): 3.85–3.92 (m, 2H,  $\text{CH}_2\text{N}$ ), 3.98–4.05 (m, 2H,  $\text{NCH}_2$ ), 7.02 (d,  $J = 8.7$  Hz, 1H,  $\text{ArH}$ ), 7.51–7.56 (m, 2H,  $\text{ArH}$ ), 7.67 (d,  $J = 7.2$  Hz, 1H,  $\text{ArH}$ ), 7.71 (s, 1H,  $\text{CH}$ ),



7.73–7.76 (dd,  $J_1 = 8.7$  Hz,  $J_2 = 1.5$  Hz, 1H, ArH), 7.89 (s, 1H, ArH), 7.92 (d,  $J = 5.4$  Hz, 2H, ArH);  $^{13}\text{C}$  NMR (75 MHz, DMSO- $d_6$ ) ( $\delta$ , ppm): 45.3, 53.3, 112.5, 119.3, 120.0 (d,  $J = 32.3$  Hz), 124.4 (d,  $J = 277.5$  Hz), 126.3, 128.2, 128.7, 129.3, 129.5, 133.8, 135.8, 135.9, 142.1, 153.2, 192.6; HRMS (TOF ES $^+$ ):  $m/z$  calcd for  $\text{C}_{19}\text{H}_{14}\text{N}_2\text{OF}_3[\text{M}+\text{H}]$ , 343.1052; found, 343.1050.

**4-(*p*-Tolyl)methanoneyl-7-(trifluoromethyl)-1,2-dihydroimidazo[1,2-*a*]quinoline (3be).**

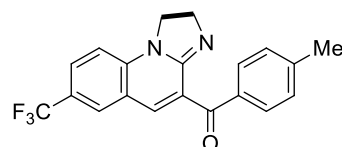

Yellow solid, m.p. 249–250 °C; IR (KBr): 1660, 1637, 1333, 1206, 1157, 1110, 1075, 997, 828, 762  $\text{cm}^{-1}$ ;  $^1\text{H}$  NMR (300 MHz, DMSO- $d_6$ ) ( $\delta$ , ppm): 2.38 (s, 3H,  $\text{CH}_3$ ), 3.85–3.91 (m, 2H,  $\text{CH}_2\text{N}$ ), 3.97–4.04 (m, 2H,  $\text{NCH}_2$ ), 7.00 (d,  $J = 8.7$  Hz, 1H, ArH), 7.32 (d,  $J = 8.7$  Hz, 2H, ArH), 7.66 (s, 1H, CH), 7.73 (d,  $J = 8.4$  Hz, 1H, ArH), 7.78 (d,  $J_1 = 8.1$  Hz, 2H, ArH), 7.92 (s, 1H, ArH);  $^{13}\text{C}$  NMR (75 MHz, DMSO- $d_6$ ) ( $\delta$ , ppm): 21.2, 45.3, 53.3, 112.4, 119.3, 119.7, 124.4 (d,  $J = 269.3$  Hz), 126.2, 128.1, 129.3, 129.5, 129.6, 133.3, 135.5, 142.0, 144.4, 153.2, 192.1; HRMS (TOF ES $^+$ ):  $m/z$  calcd for  $\text{C}_{20}\text{H}_{16}\text{N}_2\text{OF}_3[\text{M}+\text{H}]$ , 357.1209; found, 357.1210.

**4-(4'-Methoxyphenyl)methanoneyl-7-(trifluoromethyl)-1,2-dihydroimidazo[1,2-*a*]quinoline (3bf).**

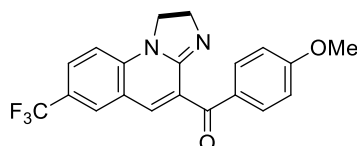

Yellow solid, m.p. 228–229 °C; IR (KBr): 2945, 1658, 1635, 1596, 1387, 1334, 1265, 1205, 1155, 1109, 856  $\text{cm}^{-1}$ ;  $^1\text{H}$  NMR (500 MHz, DMSO- $d_6$ ) ( $\delta$ , ppm): 3.85 (s, 3H,  $\text{CH}_3$ ), 3.88–3.92 (m, 2H,  $\text{CH}_2\text{N}$ ), 4.00–4.04 (m, 2H,  $\text{NCH}_2$ ), 7.03 (d,  $J = 9.0$  Hz, 1H, ArH), 7.05 (d,  $J = 8.6$  Hz, 2H, ArH), 7.65 (s, 1H, CH), 7.75 (d,  $J = 8.5$  Hz, 1H, ArH), 7.88 (d,  $J_1 = 8.5$  Hz, 2H, ArH), 7.92 (s, 1H, ArH);  $^{13}\text{C}$  NMR (125 MHz, DMSO- $d_6$ ) ( $\delta$ , ppm): 45.7, 53.6, 56.0, 112.8, 114.4, 119.8, 120.2, 125.9, 126.5, 128.4, 129.0, 130.1, 132.4, 135.5, 142.3, 153.7, 164.2, 192.4; HRMS (TOF ES $^+$ ):  $m/z$  calcd for  $\text{C}_{20}\text{H}_{16}\text{N}_2\text{O}_2\text{F}_3[\text{M}+\text{H}]$ , 373.1158; found, 373.1160.

**4-(Thiophen-2'-yl)methanoneyl-7-(trifluoromethyl)-1,2-dihydroimidazo[1,2-*a*]quinoline (3bg).**

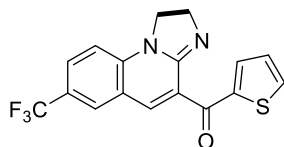

Orange solid, m.p. 208–209 °C; IR (KBr): 3069, 1650, 1633, 1413, 1334, 1204, 1159, 1118, 1073, 821, 743  $\text{cm}^{-1}$ ;  $^1\text{H}$  NMR (500 MHz,  $\text{DMSO-}d_6$ ) ( $\delta$ , ppm): 3.92–3.96 (m, 2H,  $\text{CH}_2\text{N}$ ), 4.00–4.04 (m, 2H,  $\text{NCH}_2$ ), 7.00 (d,  $J = 8.7$  Hz, 1H,  $\text{CH}$ ), 7.26 (t,  $J = 4.3$  Hz, 1H,  $\text{CH}$ ), 7.73–7.75 (m, 1H,  $\text{CH}$ ), 7.78 (s, 1H,  $\text{CH}$ ), 7.88 (d,  $J = 3.7$  Hz, 1H,  $\text{ArH}$ ), 7.93 (s, 1H,  $\text{ArH}$ ), 8.13 (d,  $J = 4.8$  Hz, 1H,  $\text{ArH}$ );  $^{13}\text{C}$  NMR (125 MHz,  $\text{DMSO-}d_6$ ) ( $\delta$ , ppm): 45.8, 53.6, 56.0, 112.8, 119.6, 120.4 (d,  $J = 32.5$  Hz), 124.8 (d,  $J = 270.0$  Hz), 126.8, 128.7, 129.0, 129.3, 136.2, 136.6, 136.9, 142.4, 143.0, 153.4, 184.7; HRMS (TOF  $\text{ES}^+$ ):  $m/z$  calcd for  $\text{C}_{17}\text{H}_{12}\text{N}_2\text{OF}_3\text{S}[\text{M}+\text{H}]$ , 349.0616; found, 349.0614.

**5-(4'-Fluorophenyl)methanoneyl-8-(trifluoromethyl)-2,3-dihydro-1H-pyrimidino[1,2-*a*]quinoline (3bh).**

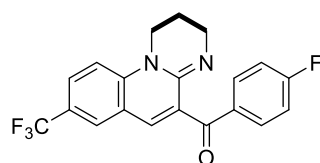

Yellowy solid, m.p. 172–173 °C; IR (KBr): 1668, 1642, 1596, 1319, 1210, 1154, 1116, 846, 814  $\text{cm}^{-1}$ ;  $^1\text{H}$  NMR (500 MHz,  $\text{DMSO-}d_6$ ) ( $\delta$ , ppm): 1.87–1.89 (m, 2H,  $\text{CH}_2$ ), 3.25–3.27 (m, 2H,  $\text{CH}_2\text{N}$ ), 3.90–3.92 (m, 2H,  $\text{NCH}_2$ ), 7.32 (t,  $J = 8.6$  Hz, 2H,  $\text{ArH}$ ), 7.37 (d,  $J = 8.9$  Hz, 1H,  $\text{ArH}$ ), 7.49 (s, 1H,  $\text{CH}$ ), 7.75 (d,  $J_1 = 8.7$  Hz, 1H,  $\text{ArH}$ ), 7.89 (s, 1H,  $\text{ArH}$ ), 7.95–7.98 (m, 2H,  $\text{ArH}$ );  $^{13}\text{C}$  NMR (123 MHz,  $\text{DMSO-}d_6$ ) ( $\delta$ , ppm): 19.9, 43.5, 44.3, 112.4, 116.1 (d,  $J = 22.5$  Hz), 119.9, 121.3 (d,  $J = 33.8$  Hz), 124.7 (d,  $J = 268.8$  Hz), 126.1 (d,  $J = 3.8$  Hz), 127.4 (d,  $J = 2.5$  Hz), 130.4, 132.4 (d,  $J = 10.0$  Hz), 133.3, 137.0, 143.8, 147.2, 165.5 (d,  $J = 252.5$  Hz), 193.2; HRMS (TOF  $\text{ES}^+$ ):  $m/z$  calcd for  $\text{C}_{20}\text{H}_{15}\text{N}_2\text{OF}_4[\text{M}+\text{H}]$ , 375.1115; found, 375.1113.

**5-(4'-Chlorophenyl)methanoneyl-8-(trifluoromethyl)-2,3-dihydro-1H-pyrimidino[1,2-*a*]quinoline (3bi).**

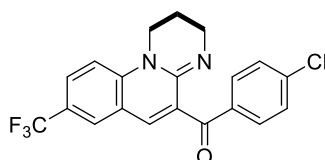

Yellowy solid, m.p. 181–182 °C; IR (KBr): 2931, 1670, 1640, 1592, 1319, 1208, 1161, 1115, 815  $\text{cm}^{-1}$ ;  $^1\text{H}$  NMR (300 MHz, DMSO- $d_6$ ) ( $\delta$ , ppm): 1.85–1.88 (m, 2H,  $\text{CH}_2$ ), 3.22–3.26 (m, 2H,  $\text{CH}_2\text{N}$ ), 3.89–3.92 (m, 2H,  $\text{NCH}_2$ ), 7.37 (d,  $J = 8.7$  Hz, 1H,  $\text{ArH}$ ), 7.51 (s, 1H,  $\text{CH}$ ), 7.55 (d,  $J = 8.4$  Hz, 2H,  $\text{ArH}$ ), 7.75 (d,  $J = 9.0$  Hz, 1H,  $\text{ArH}$ ), 7.87–7.90 (m, 3H,  $\text{ArH}$ );  $^{13}\text{C}$  NMR (75 MHz, DMSO- $d_6$ ) ( $\delta$ , ppm): 19.5, 43.0, 43.9, 112.1, 119.5, 121.0 (d,  $J = 33.0$  Hz), 124.3 (d,  $J = 270.0$  Hz), 125.8, 127.0, 128.8, 130.4, 130.8, 134.9, 136.2, 138.2, 143.4, 146.8, 193.2; HRMS (TOF  $\text{ES}^+$ ):  $m/z$  calcd for  $\text{C}_{20}\text{H}_{15}\text{N}_2\text{OF}_3\text{Cl}[\text{M}+\text{H}]$ , 391.0819; found, 391.0816.

**5-(4'-Bromophenyl)methanoneyl-8-(trifluoromethyl)-2,3-dihydro-1H-pyrimido[1,2-a]quinoline (3bj).**

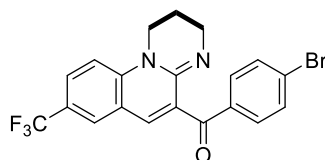

Yellowy solid, m.p. 195–196 °C; IR (KBr): 2951, 1671, 1641, 1590, 1318, 1277, 1112, 814  $\text{cm}^{-1}$ ;  $^1\text{H}$  NMR (300 MHz, DMSO- $d_6$ ) ( $\delta$ , ppm): 1.86 (m, 2H,  $\text{CH}_2$ ), 3.23 (m, 2H,  $\text{CH}_2\text{N}$ ), 3.88–3.92 (m, 2H,  $\text{NCH}_2$ ), 7.37 (d,  $J = 9.0$  Hz, 1H,  $\text{ArH}$ ), 7.51 (s, 1H,  $\text{CH}$ ), 7.70 (d,  $J = 8.4$  Hz, 2H,  $\text{ArH}$ ), 7.76 (d,  $J = 9.3$  Hz, 1H,  $\text{ArH}$ ), 7.80 (d,  $J = 8.4$  Hz, 2H,  $\text{ArH}$ ), 7.90 (s, 1H,  $\text{ArH}$ );  $^{13}\text{C}$  NMR (75 MHz, DMSO- $d_6$ ) ( $\delta$ , ppm): 19.5, 43.0, 43.8, 112.1, 119.5, 120.5 (d,  $J_2 = 32.3$ ), 124.3 (d,  $J_1 = 269.3$  Hz), 125.8, 127.1, 127.5, 130.4, 130.9, 131.8, 135.2, 136.2, 143.4, 146.8, 193.5; HRMS (TOF  $\text{ES}^+$ ):  $m/z$  calcd for  $\text{C}_{20}\text{H}_{15}\text{N}_2\text{OF}_3\text{Br}[\text{M}+\text{H}]$ , 435.0314; found, 435.0317.

**5-(Phenyl)methanoneyl-8-(trifluoromethyl)-2,3-dihydro-1H-pyrimido[1,2-a]quinoline (3bk).**

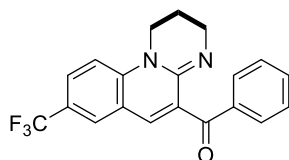

Yellowy solid, m.p. 187–188 °C; IR (KBr): 1667, 1640, 1589, 1343, 1320, 1213, 1160, 1099, 814  $\text{cm}^{-1}$ ;  $^1\text{H}$  NMR (500 MHz, DMSO- $d_6$ ) ( $\delta$ , ppm): 1.87–1.89 (m, 2H,  $\text{CH}_2$ ), 3.24–3.26 (m, 2H,  $\text{CH}_2\text{N}$ ), 3.90–3.93 (m, 2H,  $\text{NCH}_2$ ), 7.37 (d,  $J = 8.9$  Hz, 1H,  $\text{ArH}$ ), 7.48–7.52 (m, 3H,  $\text{CH}$ ), 7.63 (t,  $J = 7.4$  Hz, 1H,  $\text{ArH}$ ), 7.75 (d,  $J = 8.8$  Hz, 1H,  $\text{ArH}$ ), 7.88–7.90 (m, 3H,  $\text{ArH}$ );  $^{13}\text{C}$  NMR (125 MHz, DMSO- $d_6$ ) ( $\delta$ , ppm): 19.9, 43.4, 44.3, 112.4, 120.0, 121.4 (d,  $J = 32.5$  Hz), 124.8 (d,  $J = 267.5$  Hz), 126.0, 127.3, 129.0, 129.4, 130.3, 133.8, 136.5, 137.2, 143.7, 147.3, 194.6; HRMS

(TOF ES<sup>+</sup>):  $m/z$  calcd for C<sub>20</sub>H<sub>16</sub>N<sub>2</sub>OF<sub>3</sub>[M+H], 357.1209; found, 357.1205.

**5-(*p*-Tolyl)methanoneyl-8-(trifluoromethyl)-2,3-dihydro-1*H*-pyrimido[1,2-*a*]quinoline (3bl).**

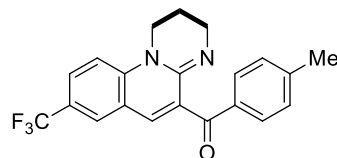

Yellowy solid, m.p. 226–227 °C; IR (KBr): 1663, 1642, 1319, 1209, 1160, 1112, 1083, 828 cm<sup>-1</sup>; <sup>1</sup>H NMR (500 MHz, DMSO-*d*<sub>6</sub>) (δ, ppm): 1.86–1.88 (m, 2H, CH<sub>2</sub>), 2.37 (s, 3H, CH<sub>3</sub>), 3.24–3.26 (m, 2H, CH<sub>2</sub>N), 3.89–3.92 (m, 2H, NCH<sub>2</sub>), 7.30 (d, *J* = 8.0 Hz, 2H, Ar*H*), 7.36 (d, *J* = 8.9 Hz, 1H, Ar*H*), 7.43 (s, 1H, CH), 7.74 (d, *J* = 8.7 Hz, 1H, Ar*H*), 7.78 (d, *J* = 8.1 Hz, 2H, Ar*H*), 7.88 (s, 1H, Ar*H*); <sup>13</sup>C NMR (125 MHz, DMSO-*d*<sub>6</sub>) (δ, ppm): 19.9, 21.6, 43.4, 44.3, 112.4, 120.0, 121.3 (d, *J* = 32.5), 124.8 (d, *J* = 270.0 Hz), 125.9, 127.1, 127.2, 129.6, 129.9, 134.1, 137.4, 143.7, 144.4, 147.2, 194.2; HRMS (TOF ES<sup>+</sup>):  $m/z$  calcd for C<sub>21</sub>H<sub>18</sub>N<sub>2</sub>OF<sub>3</sub>[M+H], 371.1365; found, 371.1363.

**5-(4'-Methoxyphenyl)methanoneyl-8-(trifluoromethyl)-2,3-dihydro-1*H*-pyrimido[1,2-*a*]quinoline (3bm).**

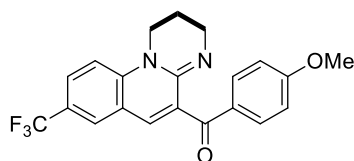

White solid, m.p. 192–193 °C; IR (KBr): 1662, 1641, 1593, 1319, 1264, 1157, 1029, 839 cm<sup>-1</sup>; <sup>1</sup>H NMR (500 MHz, DMSO-*d*<sub>6</sub>) (δ, ppm): 1.87–1.88 (m, 2H, CH<sub>2</sub>), 3.26 (m, 2H, CH<sub>2</sub>N), 3.84 (s, 3H, CH<sub>3</sub>), 3.90–3.91 (m, 2H, NCH<sub>2</sub>), 7.01–7.03 (m, 2H, Ar*H*), 7.36 (d, *J* = 8.8 Hz, 1H, Ar*H*), 7.41 (s, 1H, CH), 7.74 (d, *J* = 8.8 Hz, 1H, Ar*H*), 7.84–7.88 (m, 3H, Ar*H*); <sup>13</sup>C NMR (125 MHz, DMSO-*d*<sub>6</sub>) (δ, ppm): 19.9, 43.4, 44.3, 55.9, 112.3, 114.3, 120.0, 121.3 (d, *J* = 32.5), 124.8 (d, *J* = 270.0 Hz), 125.9, 127.2, 127.2, 129.5, 129.7, 137.5, 143.7, 147.2, 163.8, 193.1; HRMS (TOF ES<sup>+</sup>):  $m/z$  calcd for C<sub>21</sub>H<sub>18</sub>N<sub>2</sub>O<sub>2</sub>F<sub>3</sub> [M+H], 387.1314; found, 387.1317.

**5-(Thiophen-2'-yl)methanoneyl-8-(trifluoromethyl)-2,3-dihydro-1*H*-pyrimido[1,2-*a*]quinoline (3bn).**

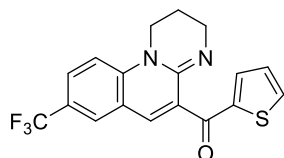

Light red solid, m.p. 209–210 °C; IR (KBr): 1645, 1586, 1343, 1319, 1209, 1156, 1102, 821, 732  $\text{cm}^{-1}$ ;  $^1\text{H}$  NMR (300 MHz,  $\text{DMSO-}d_6$ ) ( $\delta$ , ppm): 1.87–1.91 (m, 2H,  $\text{CH}_2$ ), 3.29–3.32 (m, 2H,  $\text{CH}_2\text{N}$ ), 3.88–3.92 (m, 2H,  $\text{NCH}_2$ ), 7.19–7.22 (m, 1H,  $\text{CH}$ ), 7.35 (d,  $J = 8.7$  Hz, 1H,  $\text{CH}$ ), 7.50 (s, 1H,  $\text{CH}$ ), 7.72–7.76 (m, 2H,  $\text{CH}$ ), 7.88 (d,  $J = 1.8$  Hz, 1H,  $\text{ArH}$ ), 8.04 (dd,  $J_1 = 4.8$  Hz,  $J_2 = 1.2$  Hz, 1H,  $\text{ArH}$ );  $^{13}\text{C}$  NMR (75 MHz,  $\text{DMSO-}d_6$ ) ( $\delta$ , ppm): 19.5, 43.0, 43.9, 112.0, 119.4, 120.9 (q,  $J_2 = 32.3$  Hz), 124.3 (d,  $J_1 = 269.3$  Hz), 125.7, 126.1, 127.0, 128.7, 129.8, 135.2, 135.5, 136.2, 143.3 (d,  $J_3 = 9.8$  Hz), 146.5, 186.3; HRMS (TOF  $\text{ES}^+$ ):  $m/z$  calcd for  $\text{C}_{18}\text{H}_{14}\text{N}_2\text{OF}_3\text{S}[\text{M}+\text{H}]$ , 363.0773; found, 363.0777.

**6,7,9-Trifluoro-4-(4'-fluorophenyl)methanoneyl-1,2-dihydroimidazo[1,2-a]quinoline (3ca).**

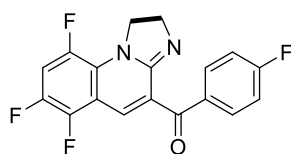

Red solid, m.p. 177–178 °C; IR (KBr): 1668, 1636, 1598, 1496, 1393, 1267, 1157, 858, 603  $\text{cm}^{-1}$ ;  $^1\text{H}$  NMR (500 MHz,  $\text{DMSO-}d_6$ ) ( $\delta$ , ppm): 3.84 (t,  $J = 10.3$  Hz, 2H,  $\text{CH}_2\text{N}$ ), 4.20–4.25 (m, 2H,  $\text{NCH}_2$ ), 7.35 (t,  $J = 8.7$  Hz, 2H,  $\text{ArH}$ ), 7.61 (s, 1H,  $\text{CH}$ ), 7.70–7.76 (m, 1H,  $\text{ArH}$ ), 7.97–8.00 (m, 2H,  $\text{ArH}$ );  $^{13}\text{C}$  NMR (125 MHz,  $\text{DMSO-}d_6$ ) ( $\delta$ , ppm): 48.6, 54.1, 108.8 (t,  $J = 25.0$  Hz), 111.5 (d,  $J = 15.0$  Hz), 116.2 (d,  $J = 22.5$  Hz), 126.4 (d,  $J = 13.8$  Hz), 127.3, 131.2, 132.7, 132.9 (d,  $J = 10.0$  Hz), 140.9 (t,  $J = 11.9$  Hz), 141.9 (m), 142.7 (d,  $J = 12.5$  Hz), 143.9 (t,  $J = 18.8$  Hz), 153.7, 165.8 (d,  $J = 251.3$  Hz), 191.1;  $^{19}\text{F}$  NMR (565 MHz,  $\text{DMSO-}d_6$ ) ( $\delta$ , ppm): -148.4 (t,  $J = 16.9$  Hz), -147.0 (d,  $J = 22.6$  Hz), -132.8 (d,  $J = 11.3$  Hz), -104.5; HRMS (TOF  $\text{ES}^+$ ):  $m/z$  calcd for  $\text{C}_{18}\text{H}_{11}\text{N}_2\text{OF}_4[\text{M}+\text{H}]$ , 347.0802; found, 347.0801.

**6,7,9-Trifluoro-4-(4'-chlorophenyl)methanoneyl-1,2-dihydroimidazo[1,2-a]quinoline (3cb).**

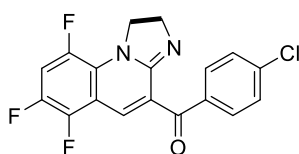

Red solid, m.p. 186–187 °C; IR (KBr): 1664, 1638, 1595, 1499, 1393, 1269, 1090,

776  $\text{cm}^{-1}$ ;  $^1\text{H}$  NMR (600 MHz,  $\text{DMSO-}d_6$ ) ( $\delta$ , ppm): 3.81–3.85 (m, 2H,  $\text{CH}_2\text{N}$ ), 4.21–4.26 (m, 2H,  $\text{NCH}_2$ ), 7.60 (d,  $J = 8.5$  Hz, 2H,  $\text{ArH}$ ), 7.65 (s, 1H,  $\text{CH}$ ), 7.73–7.78 (m, 1H,  $\text{ArH}$ ), 7.91 (d,  $J = 8.5$  Hz, 2H,  $\text{ArH}$ );  $^{13}\text{C}$  NMR (150 MHz,  $\text{DMSO-}d_6$ ) ( $\delta$ , ppm): 48.7 (d,  $J = 9.0$  Hz), 54.2, 109.0 (t,  $J = 25.5$  Hz), 111.6 (d,  $J = 10.5$  Hz), 126.6 (d,  $J = 10.0$  Hz), 127.8, 129.3, 131.0, 131.8, 134.8, 139.4, 141.1, 142.5 (d,  $J = 60.0$  Hz), 144.0 (d,  $J = 8.8$  Hz), 153.8, 191.7; HRMS (TOF  $\text{ES}^+$ ):  $m/z$  calcd for  $\text{C}_{18}\text{H}_{11}\text{N}_2\text{OF}_3\text{Cl}$  [ $\text{M}+\text{H}$ ], 363.0506; found, 363.0503.

**6,7,9-Trifluoro-4-(4'-bromophenyl)methanoneyl-1,2-dihydroimidazo[1,2-a]quinoline (3cc).**

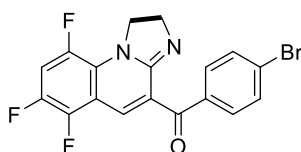

Orange solid, m.p. 203–204  $^{\circ}\text{C}$ ; IR (KBr): 1663, 1635, 1586, 1496, 1269, 1124, 774, 609  $\text{cm}^{-1}$ ;  $^1\text{H}$  NMR (600 MHz,  $\text{DMSO-}d_6 + \text{DCCl}_3$ ) ( $\delta$ , ppm): 3.83 (t,  $J = 10.3$  Hz, 2H,  $\text{CH}_2\text{N}$ ), 4.21–4.26 (m, 2H,  $\text{NCH}_2$ ), 7.64 (s, 1H,  $\text{CH}$ ), 7.73–7.74 (m, 3H,  $\text{ArH}$ ), 7.82 (d,  $J = 8.4$  Hz, 2H,  $\text{ArH}$ );  $^{13}\text{C}$  NMR (150 MHz,  $\text{DMSO-}d_6 + \text{DCCl}_3$ ) ( $\delta$ , ppm): 48.7 (d,  $J = 9.0$  Hz), 54.2, 109.0 (t,  $J = 25.5$  Hz), 111.6 (d,  $J = 10.5$  Hz), 126.6, 127.9, 128.6, 131.0, 131.8, 132.3, 135.1, 141.1, 142.7, 143.9 (d,  $J = 51.0$  Hz), 153.8, 191.8; HRMS (TOF  $\text{ES}^+$ ):  $m/z$  calcd for  $\text{C}_{18}\text{H}_{11}\text{N}_2\text{OF}_3\text{Br}$  [ $\text{M}+\text{H}$ ], 407.0001; found, 407.0000.

**6,7,9-Trifluoro-4-(phenyl)methanoneyl-1,2-dihydroimidazo[1,2-a]quinoline (3cd).**

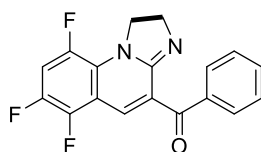

Orange solid, m.p. 195–196  $^{\circ}\text{C}$ ; IR (KBr): 1667, 1636, 1498, 1392, 1270, 803, 609  $\text{cm}^{-1}$ ;  $^1\text{H}$  NMR (500 MHz,  $\text{DMSO-}d_6$ ) ( $\delta$ , ppm): 3.84 (t,  $J = 10.3$  Hz, 2H,  $\text{CH}_2\text{N}$ ), 4.21–4.26 (m, 2H,  $\text{NCH}_2$ ), 7.54 (d,  $J = 7.7$  Hz, 2H,  $\text{ArH}$ ), 7.59 (s, 1H,  $\text{CH}$ ), 7.67–7.76 (m, 2H,  $\text{ArH}$ ), 7.90 (d,  $J = 7.5$  Hz, 2H,  $\text{ArH}$ );  $^{13}\text{C}$  NMR (125 MHz,  $\text{DMSO-}d_6$ ) ( $\delta$ , ppm): 48.6 (d,  $J = 8.8$  Hz), 54.1, 108.7 (t,  $J = 24.4$  Hz), 111.5 (d,  $J = 11.3$  Hz), 126.4 (d,  $J = 12.5$  Hz), 127.1, 129.1, 129.8, 131.4, 134.3, 135.9, 140.9, 141.9, 142.8, 143.9 (d,  $J = 33.8$  Hz), 153.7, 192.6; HRMS (TOF  $\text{ES}^+$ ):  $m/z$  calcd for  $\text{C}_{18}\text{H}_{12}\text{N}_2\text{OF}_3$  [ $\text{M}+\text{H}$ ], 329.0896; found, 329.0894.

**6,7,9-Trifluoro-4-(*p*-tolyl)methanoneyl-1,2-dihydroimidazo[1,2-*a*]quinoline (3ce).**

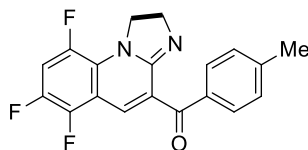

Red-orange solid, m.p. 185–186 °C; IR (KBr): 1662, 1635, 1496, 1392, 1272, 1193, 603  $\text{cm}^{-1}$ ;  $^1\text{H}$  NMR (500 MHz,  $\text{DMSO-}d_6$ ) ( $\delta$ , ppm): 2.39 (s, 3H,  $\text{CH}_3$ ), 3.83 (t,  $J = 10.3$  Hz, 2H,  $\text{CH}_2\text{N}$ ), 4.19–4.25 (m, 2H,  $\text{NCH}_2$ ), 7.33 (d,  $J = 8.0$  Hz, 2H,  $\text{ArH}$ ), 7.53 (s, 1H,  $\text{CH}$ ), 7.69–7.75 (m, 1H,  $\text{ArH}$ ), 7.79 (d,  $J = 8.1$  Hz, 2H,  $\text{ArH}$ );  $^{13}\text{C}$  NMR (125 MHz,  $\text{DMSO-}d_6$ ) ( $\delta$ , ppm): 21.6, 48.6 (d,  $J = 8.8$  Hz), 54.1, 108.6 (t,  $J = 25.0$  Hz), 111.6, 126.4, 126.7, 129.7, 130.0, 131.7, 133.5, 140.9, 141.9 (d,  $J = 30.0$  Hz), 142.8, 143.9, 145.0, 153.7, 192.0; HRMS (TOF  $\text{ES}^+$ ):  $m/z$  calcd for  $\text{C}_{19}\text{H}_{14}\text{N}_2\text{OF}_3$  [ $\text{M}+\text{H}$ ], 343.1052; found, 343.1050.

**6,7,9-Trifluoro-4-(4'-methoxyphenyl)methanoneyl-1,2-dihydroimidazo[1,2-*a*]quinoline (3cf).**

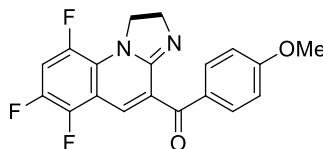

Orange solid, m.p. 191–192 °C; IR (KBr): 1633, 1598, 1497, 1260, 1162, 1026, 603  $\text{cm}^{-1}$ ;  $^1\text{H}$  NMR (300 MHz,  $\text{DMSO-}d_6$  +  $\text{DCCl}_3$ ) ( $\delta$ , ppm): 3.82–3.89 (m, 2H,  $\text{CH}_2\text{N}$ ), 3.85 (s, 3H,  $\text{CH}_3$ ), 4.19–4.27 (m, 2H,  $\text{NCH}_2$ ), 7.02 (d,  $J = 9.0$  Hz, 2H,  $\text{ArH}$ ), 7.46 (d,  $J = 1.5$  Hz, 1H,  $\text{CH}$ ), 7.57–7.67 (m, 1H,  $\text{ArH}$ ), 7.83–7.88 (m, 2H,  $\text{ArH}$ );  $^{13}\text{C}$  NMR (75 MHz,  $\text{DMSO-}d_6$ ) ( $\delta$ , ppm): 48.2 (d,  $J = 8.3$  Hz), 5.71, 55.5, 108.0 (t,  $J = 24.8$  Hz), 111.1 (d,  $J = 10.5$  Hz), 113.9, 126.0, 128.3, 131.3, 131.9, 139.8, 140.8, 143.1 (d,  $J = 18.8$  Hz), 144.0, 153.4, 163.8, 190.3; HRMS (TOF  $\text{ES}^+$ ):  $m/z$  calcd for  $\text{C}_{19}\text{H}_{14}\text{N}_2\text{O}_2\text{F}_3$  [ $\text{M}+\text{H}$ ], 359.1001; found, 359.0999.

**6,7,9-Trifluoro-4-(thiophen-2-yl)methanoneyl-1,2-dihydroimidazo[1,2-*a*]quinoline (3cg).**

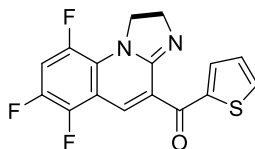

Orange solid, m.p. 170–171 °C; IR (KBr): 1640, 1496, 1413, 1280, 1127, 733  $\text{cm}^{-1}$ ;  $^1\text{H}$  NMR (600 MHz,  $\text{DMSO-}d_6$ ) ( $\delta$ , ppm): 3.86–3.89 (m, 2H,  $\text{CH}_2\text{N}$ ), 4.22–4.25 (m,

2H, NCH<sub>2</sub>), 7.25–7.26 (m, 1H, CH), 7.63 (s, 1H, CH), 7.66–7.72 (m, 1H, ArH), 7.86–7.87 (m, 1H, CH), 8.13–8.14 (m, 1H, CH); <sup>13</sup>C NMR (150 MHz, DMSO-*d*<sub>6</sub>) (δ, ppm): 48.8, 54.2, 108.9 (m), 111.5 (m), 126.5 (d, *J* = 12.0 Hz), 127.1, 129.4, 130.8, 136.9, 137.2, 141.1–142.7 (m), 142.0–142.4 (m), 142.9, 143.6–144.0 (m), 153.5, 184.4; HRMS (TOF ES<sup>+</sup>): *m/z* calcd for C<sub>16</sub>H<sub>10</sub>N<sub>2</sub>OF<sub>3</sub>S [M+H], 335.0460; found, 335.0464.

**7,8,10-Trifluoro-5-(4'-fluorophenyl)methanoneyl-2,3-dihydro-1H-pyrimido[1,2-*a*]quinoline (3ch).**

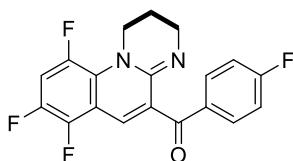

Yellow solid, m.p. 179–180 °C; IR (KBr): 2845, 1665, 1639, 1599, 1492, 1265, 1151, 992, 844 cm<sup>-1</sup>; <sup>1</sup>H NMR (500 MHz, DMSO-*d*<sub>6</sub>) (δ, ppm): 1.75 (m, 2H, CH<sub>2</sub>), 3.22 (m, 2H, CH<sub>2</sub>N), 4.14 (m, 2H, NCH<sub>2</sub>), 7.32 (t, *J* = 8.7 Hz, 2H, ArH), 7.43 (s, 1H, CH), 7.66–7.72 (m, 1H, ArH), 7.94–7.97 (m, 2H, ArH); <sup>13</sup>C NMR (125 MHz, DMSO-*d*<sub>6</sub>) (δ, ppm): 20.1, 43.5, 48.5 (d, *J* = 17.5 Hz), 108.2 (m), 112.4 (d, *J* = 18.8 Hz), 116.0 (t, *J* = 25.6 Hz), 121.3, 127.4, 132.4 (d, *J* = 10.0 Hz), 133.2 (d, *J* = 10.0 Hz), 138.5, 141.5 (d, *J* = 21.3 Hz), 143.5 (d, *J* = 6.3 Hz), 145.6, 146.8, 165.5 (d, *J* = 251.3 Hz), 192.5; <sup>19</sup>F NMR (470 MHz, DMSO-*d*<sub>6</sub>) (δ, ppm): -149.6, -145.5 (t, *J* = 9.4 Hz), -123.2, -105.3; HRMS (TOF ES<sup>+</sup>): *m/z* calcd for C<sub>19</sub>H<sub>13</sub>N<sub>2</sub>OF<sub>4</sub> [M+H], 361.0958; found, 361.0959.

**7,8,10-Trifluoro-5-(4'-chlorophenyl)methanoneyl-2,3-dihydro-1H-pyrimido[1,2-*a*]quinoline (3ci).**

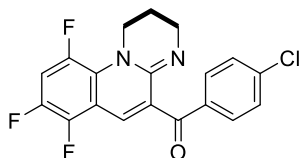

Yellow solid, m.p. 199–200 °C; IR (KBr): 2924, 1663, 1638, 1600, 1492, 1264, 1088, 991, 842 cm<sup>-1</sup>; <sup>1</sup>H NMR (600 MHz, DMSO-*d*<sub>6</sub> + HClO<sub>4</sub>) (δ, ppm): 2.16 (m, 2H, CH<sub>2</sub>), 3.54 (m, 2H, CH<sub>2</sub>N), 4.67 (m, 2H, NCH<sub>2</sub>), 7.71 (d, *J* = 8.2 Hz, 2H, ArH), 7.99 (d, *J* = 8.3 Hz, 2H, ArH), 8.26–8.31 (m, 1H, ArH), 8.48 (s, 1H, CH); <sup>13</sup>C NMR (150 MHz, DMSO-*d*<sub>6</sub> + HClO<sub>4</sub>) (δ, ppm): 18.3, 39.1, 50.8 (d, *J* = 19.5 Hz), 112.7 (m), 113.6 (d, *J* = 16.5 Hz), 124.8, 125.1, 129.6, 132.7, 134.9, 135.1, 140.3, 143.5 (d, *J* = 6.3 Hz), 145.6, 146.8, 150.7, 190.9; <sup>19</sup>F NMR (565 MHz, DMSO-*d*<sub>6</sub> +



HClO<sub>4</sub>) ( $\delta$ , ppm): -145.3 (m), -138.3 (m), -115.8; HRMS (TOF ES<sup>+</sup>): m/z calcd for C<sub>19</sub>H<sub>13</sub>N<sub>2</sub>OF<sub>3</sub>Cl [M+H], 377.0663; found, 377.0665.

**7,8,10-Trifluoro-5-(4'-bromophenyl)methanoneyl-2,3-dihydro-1H-pyrimido[1,2-a]quinoline (3cj).**

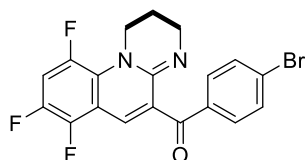

Yellow solid, m.p. 193–194 °C; IR (KBr): 2948, 1669, 1638, 1587, 1493, 1263, 1163, 1070, 906, 844 cm<sup>-1</sup>; <sup>1</sup>H NMR (600 MHz, DMSO-*d*<sub>6</sub>) ( $\delta$ , ppm): 1.74 (m, 2H, CH<sub>2</sub>), 3.21 (m, 2H, CH<sub>2</sub>N), 4.14 (m, 2H, NCH<sub>2</sub>), 7.47 (s, 1H, ArH), 7.71–7.72 (m, 3H, ArH), 7.79–7.81 (m, 2H, ArH); <sup>13</sup>C NMR (150 MHz, DMSO-*d*<sub>6</sub> + HClO<sub>4</sub>) ( $\delta$ , ppm): 20.2, 43.6, 48.6 (d, *J* = 16.5 Hz), 108.4 (m), 112.5 (d, *J* = 18.0 Hz), 121.8, 127.5, 128.0, 131.5, 132.2, 135.6, 138.3, 141.9 (d, *J* = 12.0 Hz), 143.5, 144.0, 147.0, 193.3; HRMS (TOF ES<sup>+</sup>): m/z calcd for C<sub>19</sub>H<sub>13</sub>N<sub>2</sub>OF<sub>3</sub>Br [M+H], 421.0158; found, 421.0159.

**7,8,10-Trifluoro-5-(phenyl)methanoneyl-2,3-dihydro-1H-pyrimido[1,2-a]quinoline (3ck).**

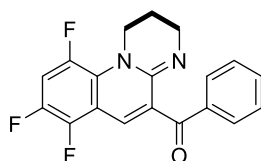

Yellow solid, m.p. 191–192 °C; IR (KBr): 2958, 1669, 1638, 1597, 1492, 1267, 1198, 1165, 990, 665 cm<sup>-1</sup>; <sup>1</sup>H NMR (600 MHz, DMSO-*d*<sub>6</sub>) ( $\delta$ , ppm): 1.72–1.76 (m, 2H, CH<sub>2</sub>), 3.21 (m, 2H, CH<sub>2</sub>N), 4.13–4.16 (m, 2H, NCH<sub>2</sub>), 7.42 (s, 1H, CH), 7.48–7.52 (m, 2H, ArH), 7.64 (t, *J* = 7.4 Hz, 1H, ArH), 7.67–7.72 (m, 1H, ArH), 7.85–7.88 (m, 2H, ArH); <sup>13</sup>C NMR (150 MHz, DMSO-*d*<sub>6</sub>) ( $\delta$ , ppm): 20.2, 43.6, 48.6, 108.2 (m), 112.5 (t, *J* = 10.5 Hz), 121.2, 127.4, 129.1, 129.5, 134.0, 136.4, 138.9, 141.8 (m), 143.4 (m), 145.6 (m), 147.0, 194.0; HRMS (TOF ES<sup>+</sup>): m/z calcd for C<sub>19</sub>H<sub>14</sub>N<sub>2</sub>OF<sub>3</sub> [M+H], 343.1052; found, 343.1054.

**7,8,10-Trifluoro-5-(*p*-tolyl)methanoneyl-2,3-dihydro-1H-pyrimido[1,2-a]quinoline (3cl).**

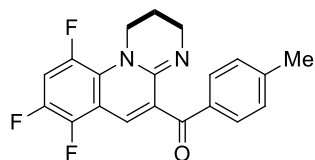

Yellow solid, m.p. 196–197 °C; IR (KBr): 1663, 1602, 1492, 1268, 1163, 990, 836  $\text{cm}^{-1}$ ;  $^1\text{H}$  NMR (300 MHz,  $\text{DMSO-}d_6$ ) ( $\delta$ , ppm): 1.69–1.76 (m, 2H,  $\text{CH}_2$ ), 2.37 (s, 3H,  $\text{CH}_3$ ), 3.19–3.22 (m, 2H,  $\text{CH}_2\text{N}$ ), 4.10–4.16 (m, 2H,  $\text{NCH}_2$ ), 7.30 (d,  $J = 7.8$  Hz, 2H, ArH), 7.35 (s, 1H, CH), 7.62–7.73 (m, 1H, ArH), 7.75 (d,  $J = 8.4$  Hz, 2H, ArH);  $^{13}\text{C}$  NMR (75 MHz,  $\text{DMSO-}d_6$ ) ( $\delta$ , ppm): 19.7, 21.2, 43.0, 48.2, 107.6 (m), 112.0 (d,  $J = 20.3$  Hz), 120.4, 127.0, 129.2, 129.2, 133.5, 138.6, 140.6 (m), 143.7 (m), 142.6–145.8 (m), 144.0, 146.4, 193.1; HRMS (TOF  $\text{ES}^+$ ): m/z calcd for  $\text{C}_{20}\text{H}_{16}\text{N}_2\text{OF}_3$  [M+H], 357.1209; found, 357.1208.

**7,8,10-Trifluoro-5-(4'-methoxyphenyl)methanoneyl-2,3-dihydro-1H-pyrimido[1,2-a]quinoline (3cm).**

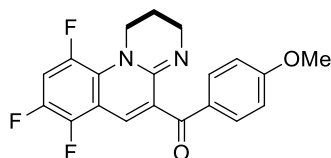

Yellow solid, m.p. 174–175 °C; IR (KBr): 1659, 1597, 1493, 1257, 1162, 1019, 849  $\text{cm}^{-1}$ ;  $^1\text{H}$  NMR (500 MHz,  $\text{DMSO-}d_6$ ) ( $\delta$ , ppm): 1.74–1.76 (m, 2H,  $\text{CH}_2$ ), 3.23–3.24 (m, 2H,  $\text{CH}_2\text{N}$ ), 3.85 (s, 3H,  $\text{CH}_3$ ), 4.14–4.15 (m, 2H,  $\text{NCH}_2$ ), 7.03 (d,  $J = 8.8$  Hz, 2H, ArH), 7.34 (s, 1H, CH), 7.63–7.73 (m, 1H, ArH), 7.84 (d,  $J = 8.7$  Hz, 2H, ArH);  $^{13}\text{C}$  NMR (125 MHz,  $\text{DMSO-}d_6$ ) ( $\delta$ , ppm): 20.1, 43.4, 48.5, 56.0, 108.0 (m), 112.4, 114.3, 120.7, 127.3, 129.3, 131.9, 139.0, 141.6 (m), 143.3 (m), 143.7–145.5 (m), 146.8, 163.9, 192.3; HRMS (TOF  $\text{ES}^+$ ): m/z calcd for  $\text{C}_{20}\text{H}_{16}\text{N}_2\text{O}_2\text{F}_3$  [M+H], 373.1158; found, 373.1158.

**7,8,10-Trifluoro-5-(thiophen-2'-yl)methanoneyl-2,3-dihydro-1H-pyrimido[1,2-a]quinoline (3cn).**

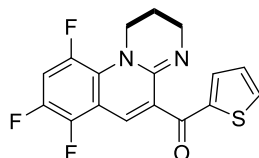

Yellow solid, m.p. 178–179 °C; IR (KBr): 2959, 1641, 1599, 1492, 1409, 1256, 1197, 983, 857  $\text{cm}^{-1}$ ;  $^1\text{H}$  NMR (600 MHz,  $\text{DMSO-}d_6$ ) ( $\delta$ , ppm): 1.75–1.78 (m, 2H,  $\text{CH}_2$ ), 3.26–3.28 (m, 2H,  $\text{CH}_2\text{N}$ ), 4.12–4.15 (m, 2H,  $\text{NCH}_2$ ), 7.20–7.22 (m, 1H, CH), 7.42 (s, 1H, CH), 7.66–7.72 (m, 1H, ArH), 7.75–7.76 (m, 1H, CH), 8.04–8.05

(m, 1H, CH);  $^{13}\text{C}$  NMR (150 MHz, DMSO- $d_6$ ) ( $\delta$ , ppm): 20.2, 43.5, 48.6, 108.4 (m), 112.3 (t,  $J = 7.5$  Hz), 121.2, 127.5 (d,  $J = 7.5$  Hz), 129.2, 135.8, 136.0, 138.3, 141.7–142.0 (m), 143.4–143.5 (m), 143.5, 143.8–145.5 (m), 146.6, 186.2; HRMS (TOF ES $^+$ ):  $m/z$  calcd for  $\text{C}_{17}\text{H}_{12}\text{N}_2\text{OF}_3\text{S}$  [M+H], 349.0616; found, 349.0618.

**6,7,9-Trifluoro-4-(4'-fluorophenyl)methanoneyl-8-(piperidin-1-yl)-1,2-dihydroimidazo[1,2-*a*]quinoline (4da).**

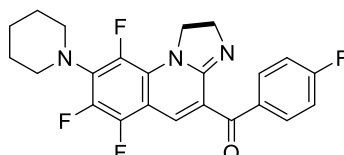

Red solid, m.p. 170–171 °C; IR (KBr): 2935, 2851, 1653, 1628, 1482, 1271, 1232, 1156, 1119, 1001, 848, 768, 602 $\text{cm}^{-1}$ ;  $^1\text{H}$  NMR (500 MHz, DMSO- $d_6$ +  $\text{CDCl}_3$ ) ( $\delta$ , ppm): 1.62–1.68 (m, 6H,  $\text{CH}_2$ ), 3.23 (m, 4H,  $\text{CH}_2$ ), 3.84 (t,  $J = 10.2$  Hz, 2H,  $\text{CH}_2\text{N}$ ), 4.21–4.26 (m, 2H,  $\text{NCH}_2$ ), 7.28 (t,  $J = 8.7$  Hz, 2H, ArH), 7.48 (s, 1H, CH), 7.90–7.93 (m, 2H, ArH);  $^{13}\text{C}$  NMR (125 MHz, DMSO- $d_6$  +  $\text{CDCl}_3$ ) ( $\delta$ , ppm): 24.0, 26.5, 48.8, 52.2, 53.9, 115.9 (d,  $J_2 = 22.5$  Hz), 127.3, 128.7, 132.7 (d,  $J_3 = 10.0$  Hz), 133.1, 133.6, 154.0, 165.7 (d,  $J_1 = 252.5$  Hz), 191.1;  $^{19}\text{F}$  NMR (471 MHz, DMSO- $d_6$ +  $\text{DCCl}_3$ ) ( $\delta$ , ppm): -105.0, -145.9, -148.5, -156.9 (d,  $J = 18.8$  Hz); HRMS (TOF ES $^+$ ):  $m/z$  calcd for  $\text{C}_{23}\text{H}_{20}\text{N}_3\text{OF}_4$  [M+H], 430.1537; found, 430.1533.

**6,7,9-Trifluoro-4-(4'-chlorophenyl)methanoneyl-8-(piperidin-1-yl)-1,2-dihydroimidazo[1,2-*a*]quinoline (4db).**

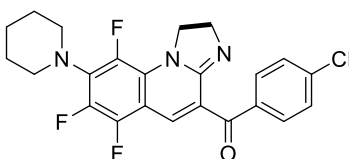

Red solid, m.p. 160–161 °C; IR (KBr): 2932, 2854, 1628, 1483, 1269, 1120, 1090, 1000, 844, 766 $\text{cm}^{-1}$ ;  $^1\text{H}$  NMR (300 MHz, DMSO- $d_6$ +  $\text{CDCl}_3$ ) ( $\delta$ , ppm): 1.61 (m, 6H,  $\text{CH}_2$ ), 3.22 (m, 4H,  $\text{CH}_2$ ), 3.84 (t,  $J = 10.2$  Hz, 2H,  $\text{CH}_2\text{N}$ ), 4.17–4.26 (m, 2H,  $\text{NCH}_2$ ), 7.47 (s, 1H, CH), 7.49 (d,  $J = 8.7$  Hz, 2H, ArH), 7.82 (d,  $J = 8.4$  Hz, 2H, ArH);  $^{13}\text{C}$  NMR (75 MHz, DMSO- $d_6$  +  $\text{CDCl}_3$ ) ( $\delta$ , ppm): 23.6, 26.1, 48.3, 51.8, 53.6, 103.2, 126.0, 126.5, 128.5, 128.8, 131.0, 134.7, 138.6, 153.6, 191.0; HRMS (TOF ES $^+$ ):  $m/z$  calcd for  $\text{C}_{23}\text{H}_{20}\text{ClN}_3\text{OF}_3$  [M+H], 446.1242; found, 446.1239.

**6,7,9-Trifluoro-4-(4'-bromophenyl)methanoneyl-8-(piperidin-1-yl)-1,2-dihydroimidazo[1,2-*a*]quinoline (4dc).**

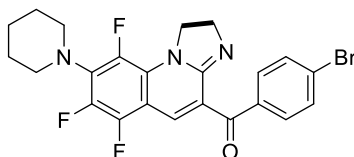

Orange solid, m.p. 181–181 °C; IR (KBr): 2933, 2855, 1654, 1633, 1478, 1386, 1270, 1156, 1121, 997, 832, 761 $\text{cm}^{-1}$ ;  $^1\text{H}$  NMR (500 MHz,  $\text{DMSO-}d_6 + \text{CDCl}_3$ ) ( $\delta$ , ppm): 1.62 (m, 6H,  $\text{CH}_2$ ), 3.24 (m, 4H,  $\text{CH}_2$ ), 3.83 (t,  $J = 10.2$  Hz, 2H,  $\text{CH}_2\text{N}$ ), 4.21–4.26 (m, 2H,  $\text{NCH}_2$ ), 7.52 (s, 1H,  $\text{CH}$ ), 7.69 (d,  $J = 8.4$  Hz, 2H,  $\text{ArH}$ ), 7.76 (d,  $J = 8.4$  Hz, 2H,  $\text{ArH}$ );  $^{13}\text{C}$  NMR (150 MHz,  $\text{DMSO-}d_6 + \text{CDCl}_3$ ) ( $\delta$ , ppm): 23.80, 26.6, 44.7, 50.8, 52.4, 104.9, 114.7, 124.0, 126.6, 127.0, 128.1, 131.9, 132.4, 135.6, 137.4, 138.1, 139.7, 140.2, 140.5, 141.6, 146.7, 155.2, 190.9;  $^{19}\text{F}$  NMR (565 MHz,  $\text{DMSO-}d_6 + \text{DCCl}_3$ ) ( $\delta$ , ppm): -143.9, -144.0, -148.7 (d,  $J = 16.9$  Hz); HRMS (TOF  $\text{ES}^+$ ):  $m/z$  calcd for  $\text{C}_{23}\text{H}_{20}\text{N}_3\text{OF}_3\text{Br}$  [ $\text{M}+\text{H}$ ], 490.0735; found, 490.0737.

**6,7,9-Trifluoro-4-(phenyl)methanoneyl-8-(piperidin-1-yl)-1,2-dihydroimidazo[1,2-*a*]quinoline (4dd).**

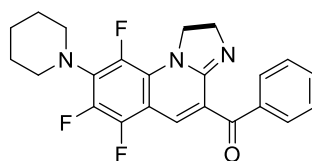

Orange-red solid, m.p. 186–187 °C; IR (KBr): 2938, 2853, 1633, 1480, 1456, 1268, 1119, 1000, 656 $\text{cm}^{-1}$ ;  $^1\text{H}$  NMR (600 MHz,  $\text{DMSO-}d_6$ ) ( $\delta$ , ppm): 1.62 (m, 6H,  $\text{CH}_2$ ), 3.23 (m, 4H,  $\text{CH}_2$ ), 3.86 (t,  $J = 10.3$  Hz, 2H,  $\text{CH}_2\text{N}$ ), 4.21–4.26 (m, 2H,  $\text{NCH}_2$ ), 7.43 (s, 1H,  $\text{CH}$ ), 7.46–7.49 (m, 2H,  $\text{ArH}$ ), 7.60–7.62 (m, 1H,  $\text{ArH}$ ), 7.83 (d,  $J = 7.5$  Hz, 2H,  $\text{ArH}$ );  $^{13}\text{C}$  NMR (150 MHz,  $\text{DMSO-}d_6$ ) ( $\delta$ , ppm): 23.7, 26.5, 44.7, 50.7, 52.3, 104.8 (d,  $J_3 = 19.5$  Hz), 114.8, 124.0, 129.3, 129.9, 133.9, 136.5, 137.2, 137.9, 139.8, 140.4, 155.2, 191.7;  $^{19}\text{F}$  NMR (471 MHz,  $\text{DMSO-}d_6 + \text{DCCl}_3$ ) ( $\delta$ , ppm): -143.9, -144.6, -149.0 (d,  $J = 22.6$  Hz); HRMS (TOF  $\text{ES}^+$ ):  $m/z$  calcd for  $\text{C}_{23}\text{H}_{21}\text{N}_3\text{OF}_3$  [ $\text{M}+\text{H}$ ], 412.1631; found, 412.1633.

## X-ray Structure and Data<sup>4</sup> of 3bf

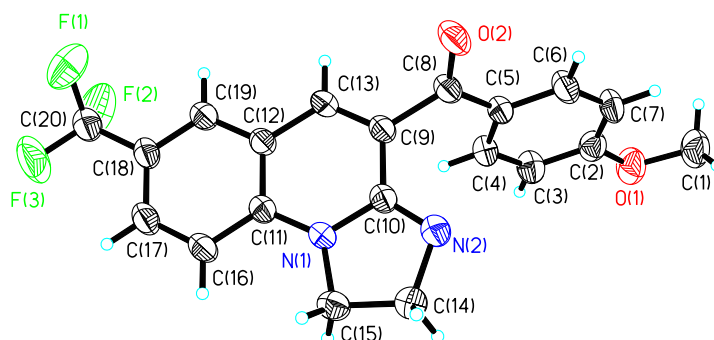

**Figure S1.** X-Ray crystal structure of **3bf**

**Table S1** Crystal data and structure refinement for **3bf**

|                                   |                                                                                                                         |
|-----------------------------------|-------------------------------------------------------------------------------------------------------------------------|
| Identification code               | 1                                                                                                                       |
| Empirical formula                 | C <sub>20</sub> H <sub>15</sub> F <sub>3</sub> N <sub>2</sub> O <sub>2</sub>                                            |
| Formula weight                    | 372.34                                                                                                                  |
| Temperature                       | 293(2) K                                                                                                                |
| Wavelength                        | 0.71073 Å                                                                                                               |
| Crystal system, space group       | Monoclinic, P2(1)/n                                                                                                     |
| Unit cell dimensions              | a = 13.0354(17) Å    alpha = 90 deg<br>b = 8.9711(12) Å    beta = 103.316(2) deg.<br>c = 15.209(2) Å    gamma = 90 deg. |
| Volume                            | 1730.8(4) Å <sup>3</sup>                                                                                                |
| Z, Calculated density             | 4, 1.429 Mg/m <sup>3</sup>                                                                                              |
| Absorption coefficient            | 0.115 mm <sup>-1</sup>                                                                                                  |
| F(000)                            | 768                                                                                                                     |
| Crystal size                      | 0.40 x 0.36 x 0.32 mm                                                                                                   |
| Theta range for data collection   | 1.86 to 25.14 deg.                                                                                                      |
| Limiting indices                  | -15 ≤ h ≤ 15, -10 ≤ k ≤ 10, -18 ≤ l ≤ 18                                                                                |
| Reflection collected/unique       | 13129 / 3092 [R(int) = 0.0456]                                                                                          |
| Completeness to theta = 30.07     | 99.9 %                                                                                                                  |
| Max. and min. transmission        | 0.9641 and 0.9554                                                                                                       |
| Refinement method                 | Full-matrix least-squares on F <sup>2</sup>                                                                             |
| Data/restraints/parameters        | 3092 / 0 / 246                                                                                                          |
| Goodness-of-fit on F <sup>2</sup> | 1.022                                                                                                                   |
| Final R indices [I > 2σ(I)]       | R1 = 0.0563, wR2 = 0.1471                                                                                               |
| R indices (all data)              | R1 = 0.1038, wR2 = 0.1812                                                                                               |
| Extinction coefficient            | 0.0047(16)                                                                                                              |
| Largest diff. peak and hole       | 0.387 and -0.330 e.Å <sup>-3</sup>                                                                                      |

**Table S2** Bond lengths [Å] and angles [deg] for **3bf**

---

|              |          |
|--------------|----------|
| F(1)-C(20)   | 1.341(4) |
| F(2)-C(20)   | 1.295(5) |
| F(3)-C(20)   | 1.297(4) |
| N(1)-C(11)   | 1.376(4) |
| N(1)-C(10)   | 1.394(3) |
| N(1)-C(15)   | 1.459(4) |
| N(2)-C(10)   | 1.288(4) |
| N(2)-C(14)   | 1.487(4) |
| O(1)-C(2)    | 1.371(4) |
| O(1)-C(1)    | 1.423(4) |
| O(2)-C(8)    | 1.228(3) |
| C(1)-H(1A)   | 0.9600   |
| C(1)-H(1B)   | 0.9600   |
| C(1)-H(1C)   | 0.9600   |
| C(2)-C(7)    | 1.380(5) |
| C(2)-C(3)    | 1.383(5) |
| C(3)-C(4)    | 1.374(4) |
| C(3)-H(3)    | 0.9300   |
| C(4)-C(5)    | 1.391(4) |
| C(4)-H(4)    | 0.9300   |
| C(5)-C(6)    | 1.390(4) |
| C(5)-C(8)    | 1.477(4) |
| C(6)-C(7)    | 1.389(4) |
| C(6)-H(6)    | 0.9300   |
| C(7)-H(7)    | 0.9300   |
| C(8)-C(9)    | 1.517(4) |
| C(9)-C(13)   | 1.352(4) |
| C(9)-C(10)   | 1.457(4) |
| C(11)-C(16)  | 1.403(4) |
| C(11)-C(12)  | 1.417(4) |
| C(12)-C(19)  | 1.392(4) |
| C(12)-C(13)  | 1.452(4) |
| C(13)-H(13)  | 0.9300   |
| C(14)-C(15)  | 1.535(4) |
| C(14)-H(14A) | 0.9700   |
| C(14)-H(14B) | 0.9700   |
| C(15)-H(15A) | 0.9700   |
| C(15)-H(15B) | 0.9700   |
| C(16)-C(17)  | 1.381(4) |
| C(16)-H(16)  | 0.9300   |
| C(17)-C(18)  | 1.390(4) |
| C(17)-H(17)  | 0.9300   |
| C(18)-C(19)  | 1.381(4) |
| C(18)-C(20)  | 1.479(5) |

---

---

|                   |          |
|-------------------|----------|
| C(19)-H(19)       | 0.9300   |
| C(11)-N(1)-C(10)  | 124.6(2) |
| C(11)-N(1)-C(15)  | 127.0(2) |
| C(10)-N(1)-C(15)  | 108.3(2) |
| C(10)-N(2)-C(14)  | 106.5(2) |
| C(2)-O(1)-C(1)    | 118.2(3) |
| O(1)-C(1)-H(1A)   | 109.5    |
| O(1)-C(1)-H(1B)   | 109.5    |
| H(1A)-C(1)-H(1B)  | 109.5    |
| O(1)-C(1)-H(1C)   | 109.5    |
| H(1A)-C(1)-H(1C)  | 109.5    |
| H(1B)-C(1)-H(1C)  | 109.5    |
| O(1)-C(2)-C(7)    | 124.7(3) |
| O(1)-C(2)-C(3)    | 115.9(3) |
| C(7)-C(2)-C(3)    | 119.4(3) |
| C(4)-C(3)-C(2)    | 120.8(3) |
| C(4)-C(3)-H(3)    | 119.6    |
| C(2)-C(3)-H(3)    | 119.6    |
| C(3)-C(4)-C(5)    | 120.9(3) |
| C(3)-C(4)-H(4)    | 119.5    |
| C(5)-C(4)-H(4)    | 119.5    |
| C(6)-C(5)-C(4)    | 117.8(3) |
| C(6)-C(5)-C(8)    | 121.0(3) |
| C(4)-C(5)-C(8)    | 121.2(3) |
| C(7)-C(6)-C(5)    | 121.5(3) |
| C(7)-C(6)-H(6)    | 119.2    |
| C(5)-C(6)-H(6)    | 119.2    |
| C(2)-C(7)-C(6)    | 119.6(3) |
| C(2)-C(7)-H(7)    | 120.2    |
| C(6)-C(7)-H(7)    | 120.2    |
| O(2)-C(8)-C(5)    | 122.5(3) |
| O(2)-C(8)-C(9)    | 119.3(3) |
| C(5)-C(8)-C(9)    | 118.2(2) |
| C(13)-C(9)-C(10)  | 119.5(3) |
| C(13)-C(9)-C(8)   | 122.3(3) |
| C(10)-C(9)-C(8)   | 118.1(3) |
| N(2)-C(10)-N(1)   | 116.1(3) |
| N(2)-C(10)-C(9)   | 126.7(3) |
| N(1)-C(10)-C(9)   | 117.2(3) |
| N(1)-C(11)-C(16)  | 121.9(3) |
| N(1)-C(11)-C(12)  | 118.2(2) |
| C(16)-C(11)-C(12) | 119.9(3) |
| C(19)-C(12)-C(11) | 118.5(3) |
| C(19)-C(12)-C(13) | 123.0(3) |
| C(11)-C(12)-C(13) | 118.5(3) |

---

---

|                     |          |
|---------------------|----------|
| C(9)-C(13)-C(12)    | 121.9(3) |
| C(9)-C(13)-H(13)    | 119.0    |
| C(12)-C(13)-H(13)   | 119.0    |
| N(2)-C(14)-C(15)    | 107.0(3) |
| N(2)-C(14)-H(14A)   | 110.3    |
| C(15)-C(14)-H(14A)  | 110.3    |
| N(2)-C(14)-H(14B)   | 110.3    |
| C(15)-C(14)-H(14B)  | 110.3    |
| H(14A)-C(14)-H(14B) | 108.6    |
| N(1)-C(15)-C(14)    | 102.1(2) |
| N(1)-C(15)-H(15A)   | 111.3    |
| C(14)-C(15)-H(15A)  | 111.3    |
| N(1)-C(15)-H(15B)   | 111.3    |
| C(14)-C(15)-H(15B)  | 111.3    |
| H(15A)-C(15)-H(15B) | 109.2    |
| C(17)-C(16)-C(11)   | 119.9(3) |
| C(17)-C(16)-H(16)   | 120.1    |
| C(11)-C(16)-H(16)   | 120.1    |
| C(16)-C(17)-C(18)   | 120.7(3) |
| C(16)-C(17)-H(17)   | 119.7    |
| C(18)-C(17)-H(17)   | 119.7    |
| C(19)-C(18)-C(17)   | 119.7(3) |
| C(19)-C(18)-C(20)   | 120.1(3) |
| C(17)-C(18)-C(20)   | 120.1(3) |
| C(18)-C(19)-C(12)   | 121.4(3) |
| C(18)-C(19)-H(19)   | 119.3    |
| C(12)-C(19)-H(19)   | 119.3    |
| F(2)-C(20)-F(3)     | 108.5(4) |
| F(2)-C(20)-F(1)     | 102.7(3) |
| F(3)-C(20)-F(1)     | 102.1(4) |
| F(2)-C(20)-C(18)    | 114.8(3) |
| F(3)-C(20)-C(18)    | 114.4(3) |
| F(1)-C(20)-C(18)    | 113.0(3) |

---

Symmetry transformations used to generate equivalent atoms:



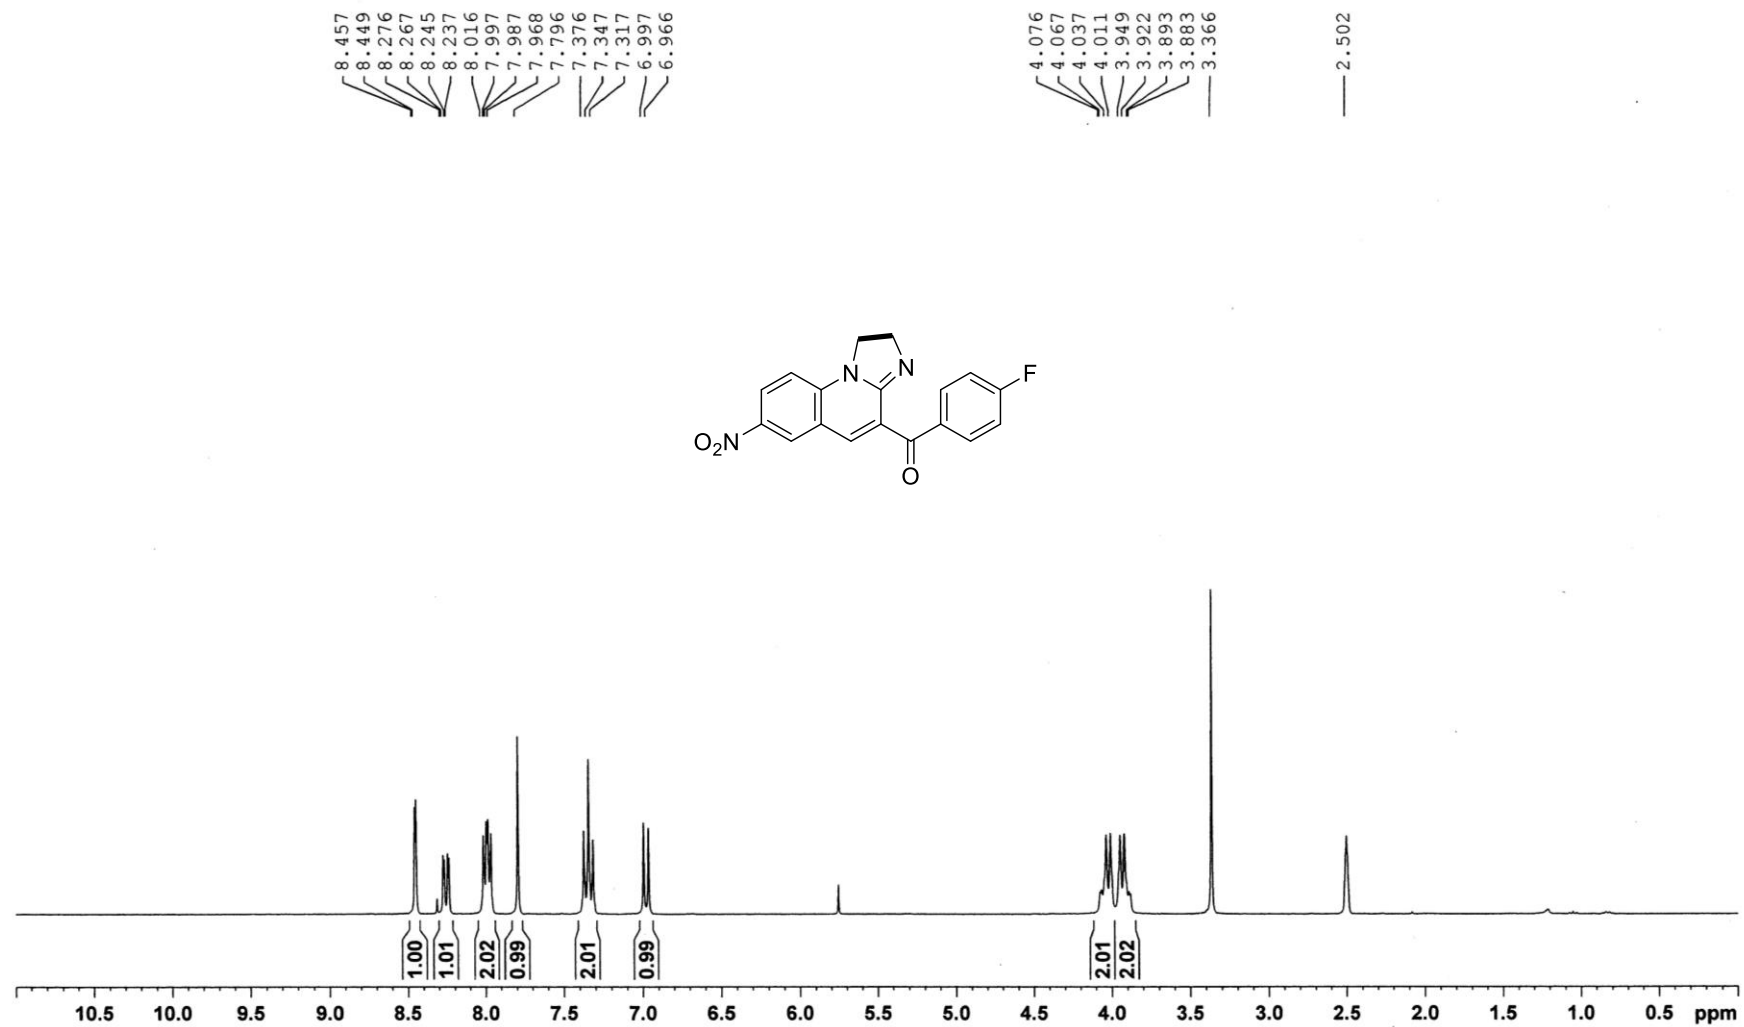

Figure S2. <sup>1</sup>H NMR (300 MHz, DMSO-*d*<sub>6</sub>) spectra of compound **3aa**

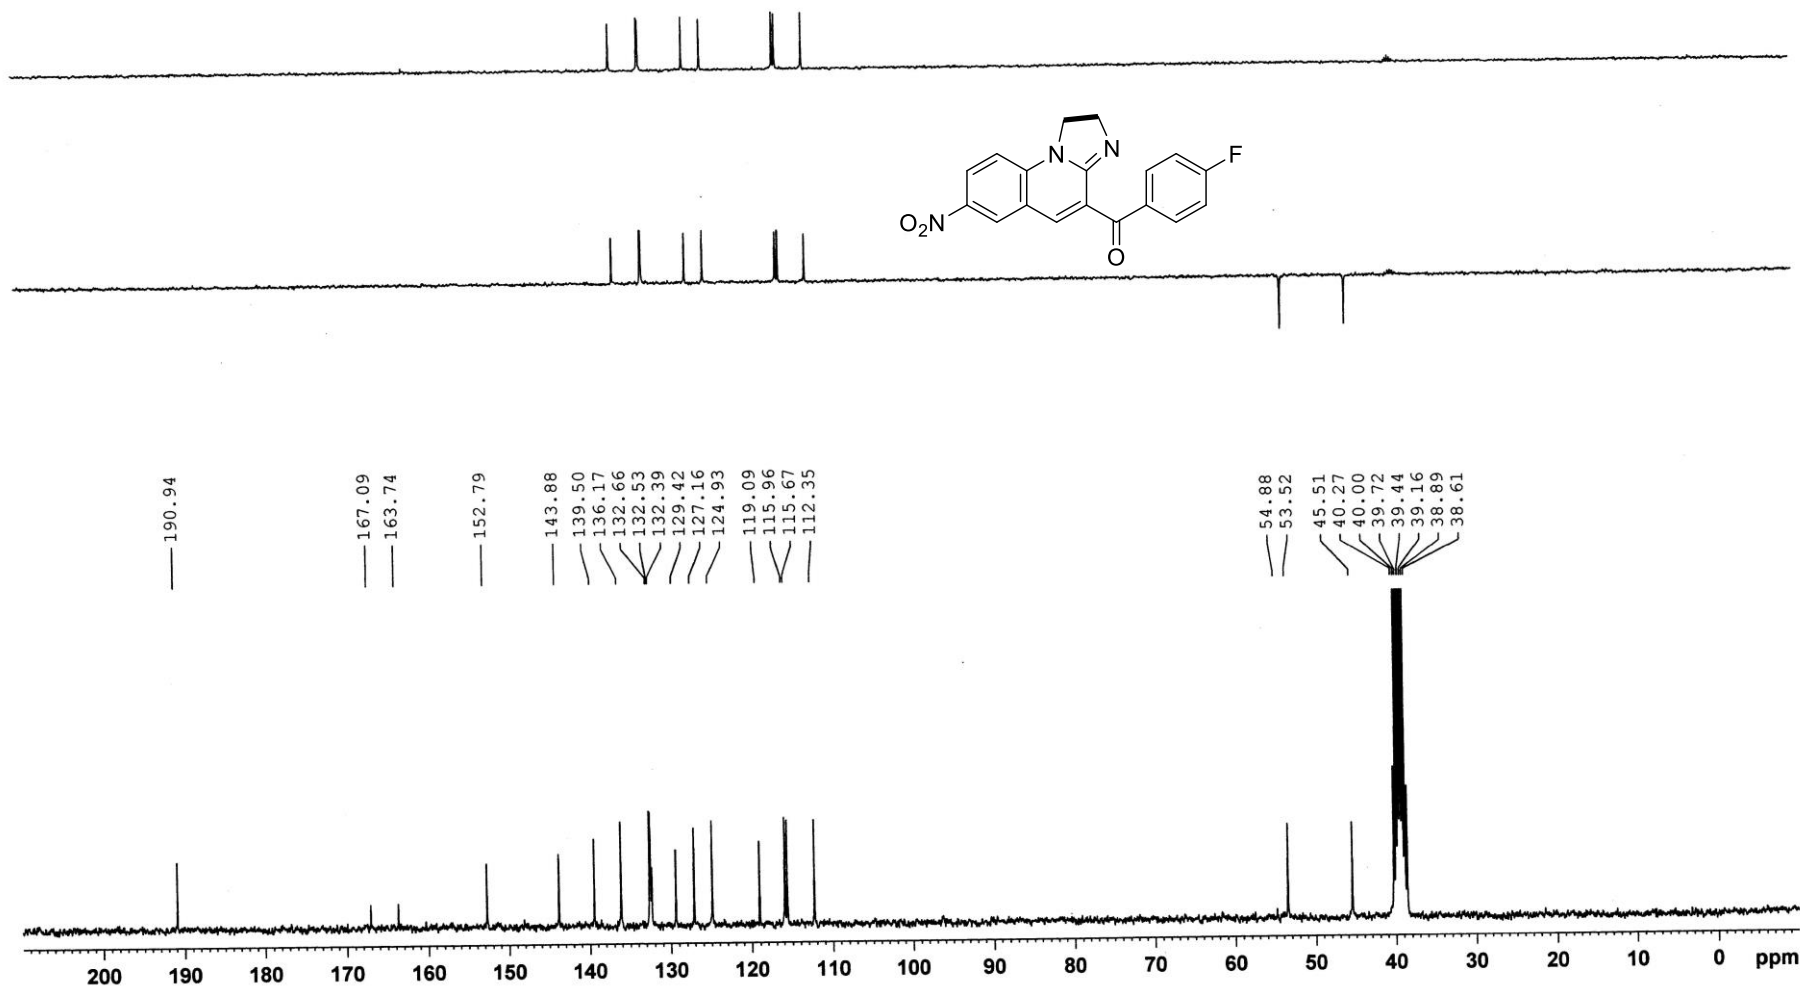

Figure S3. <sup>13</sup>C NMR (75 MHz, DMSO-*d*<sub>6</sub>) spectra of compound 3aa

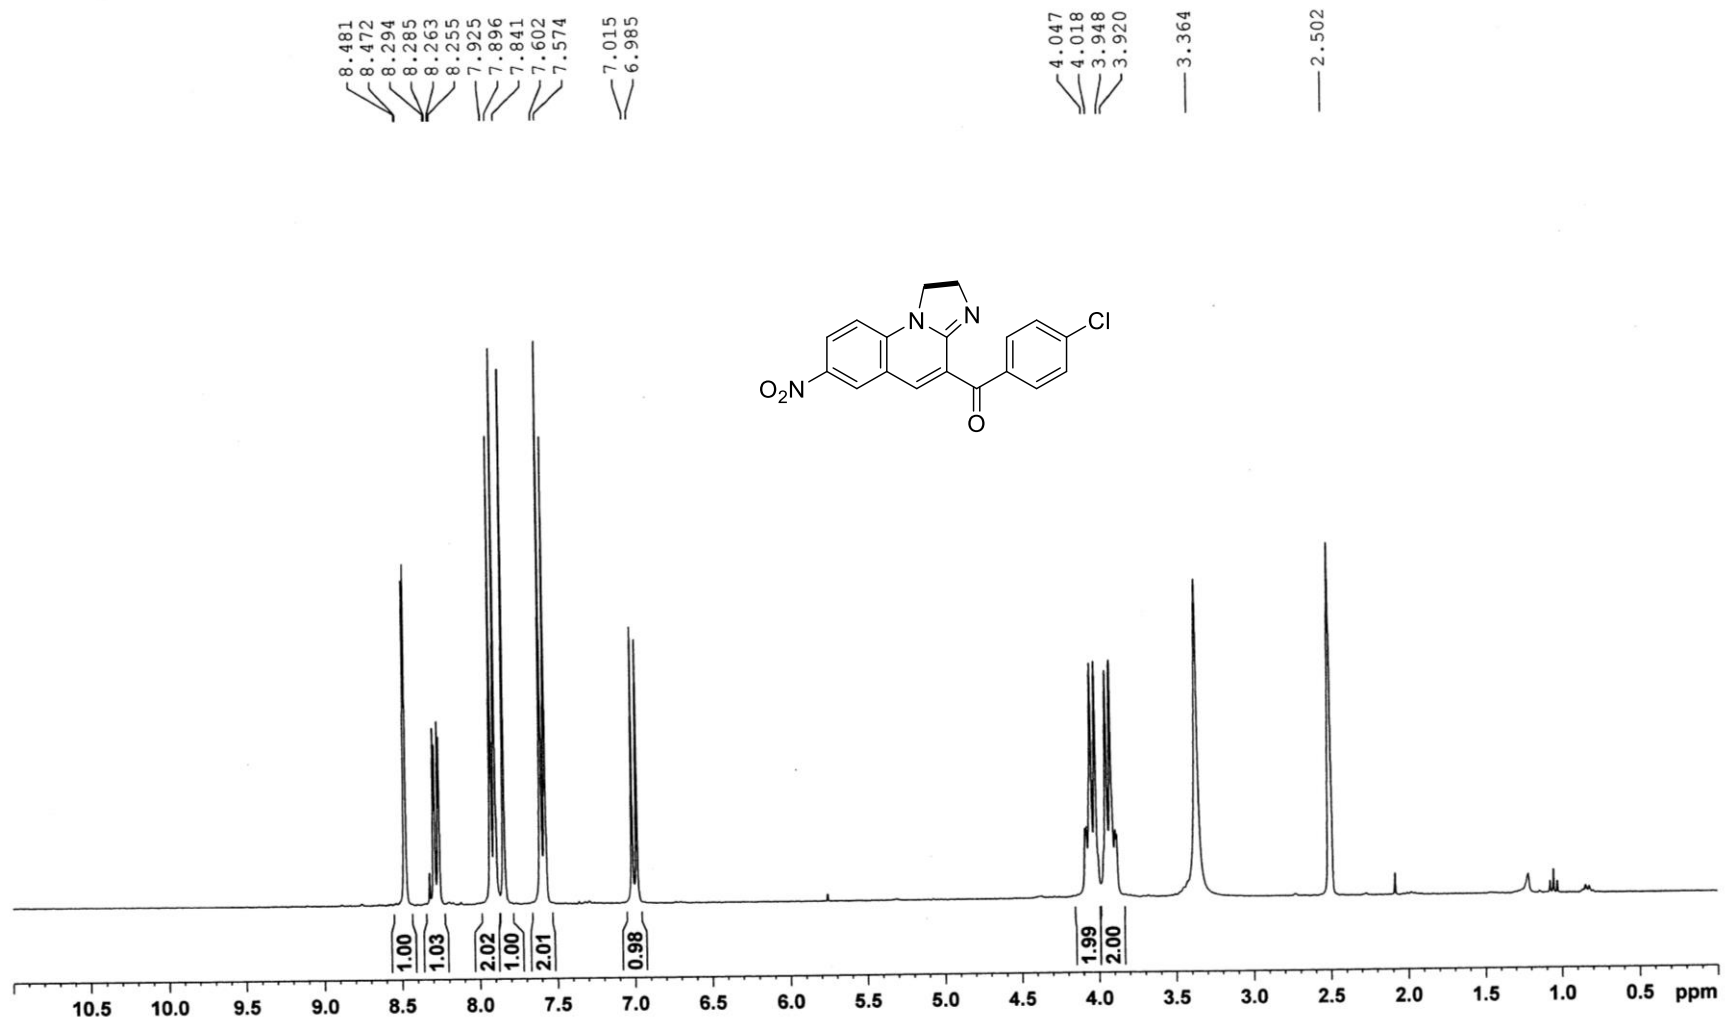

Figure S4. <sup>1</sup>H NMR (300 MHz, DMSO-*d*<sub>6</sub>) spectra of compound **3ab**

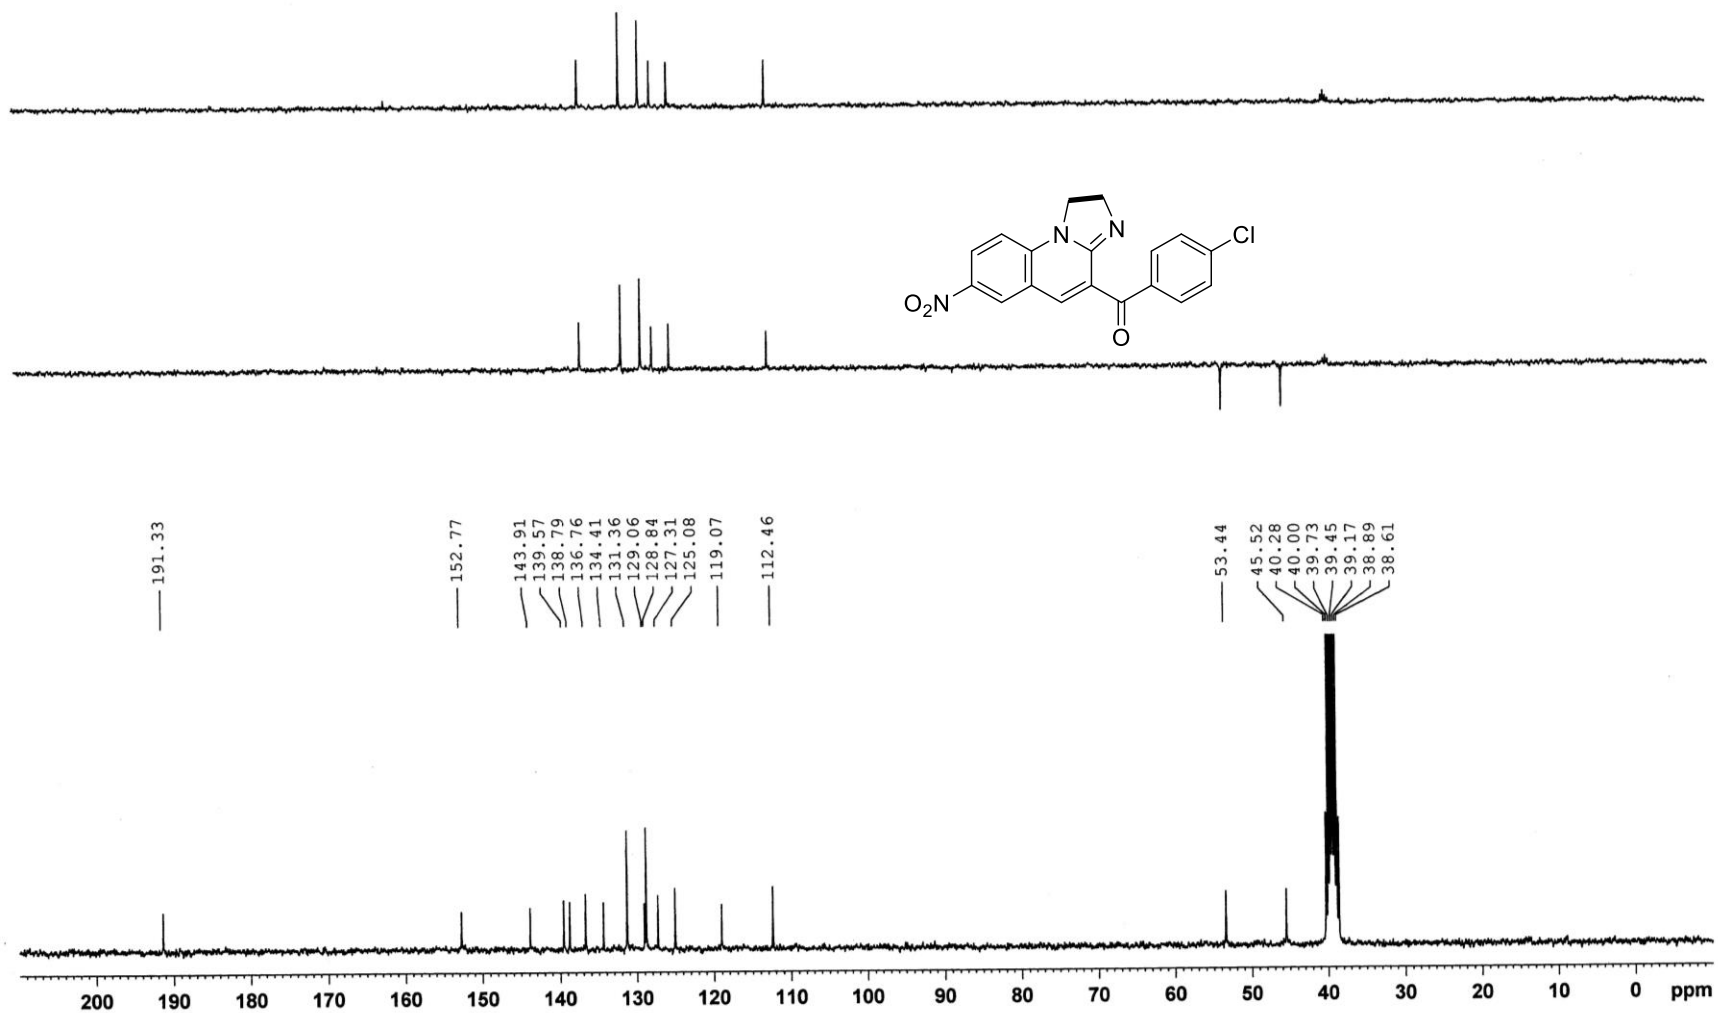

Figure S5.  $^{13}\text{C}$  NMR (75 MHz,  $\text{DMSO-}d_6$ ) spectra of compound **3ab**

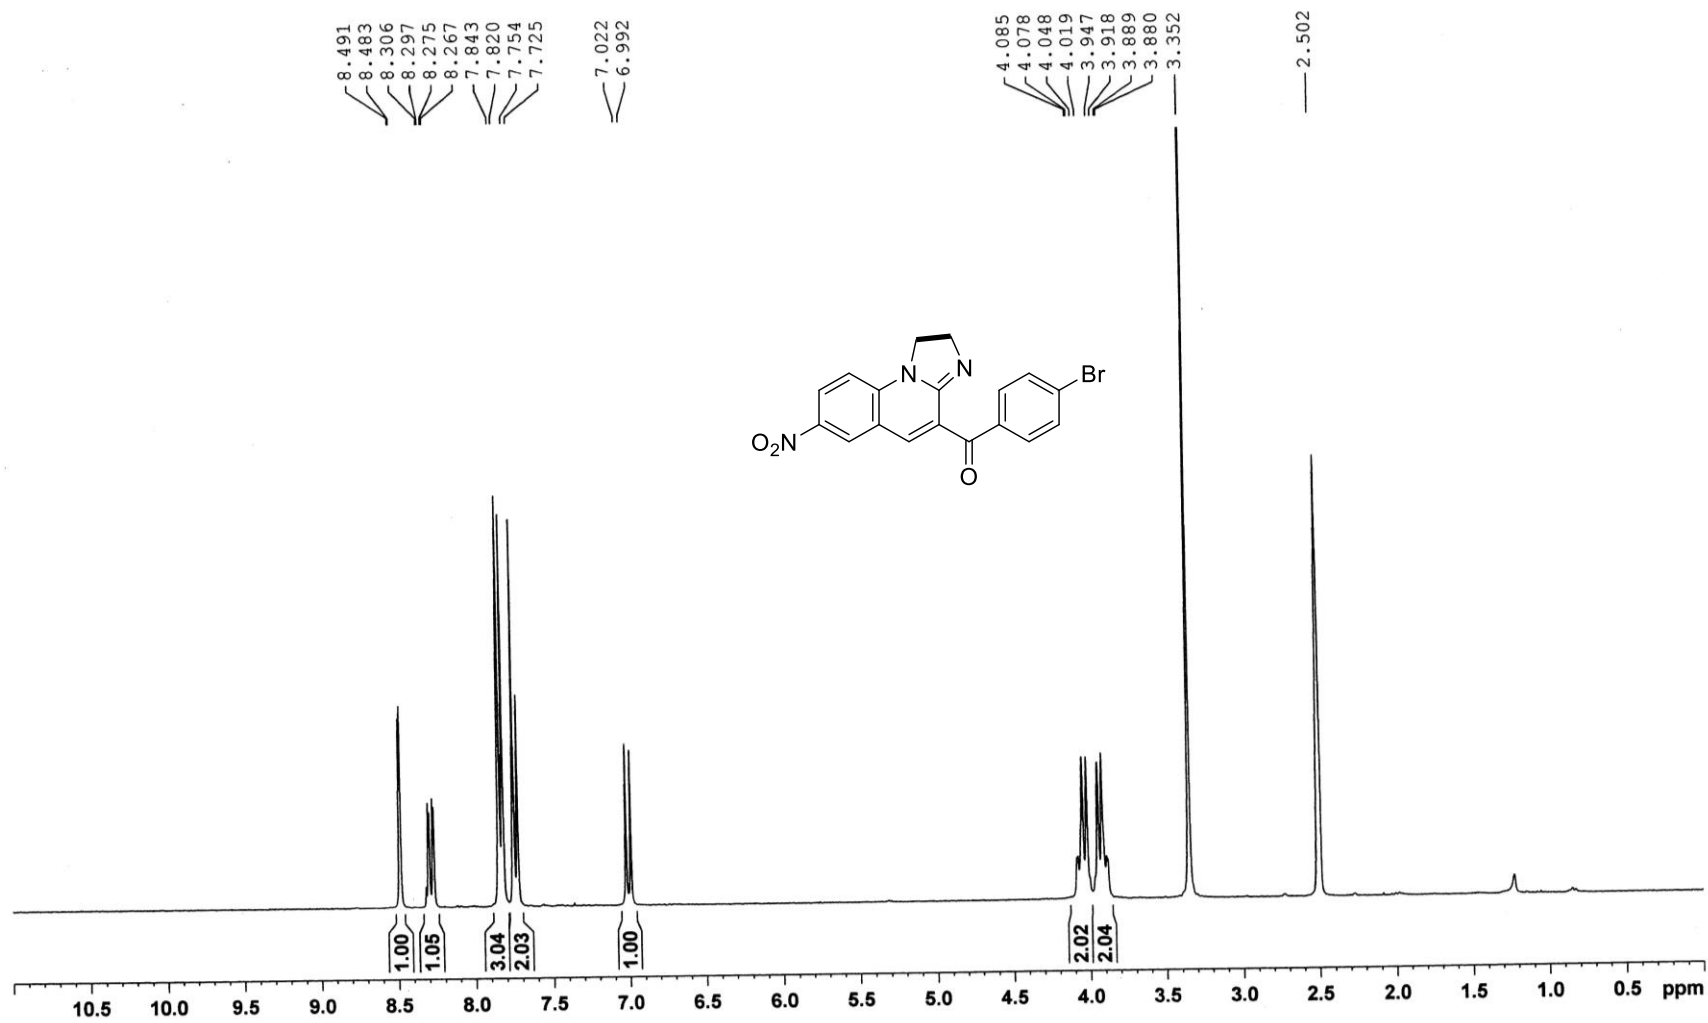

Figure S6. <sup>1</sup>H NMR (300 MHz, DMSO-*d*<sub>6</sub>) spectra of compound **3ac**

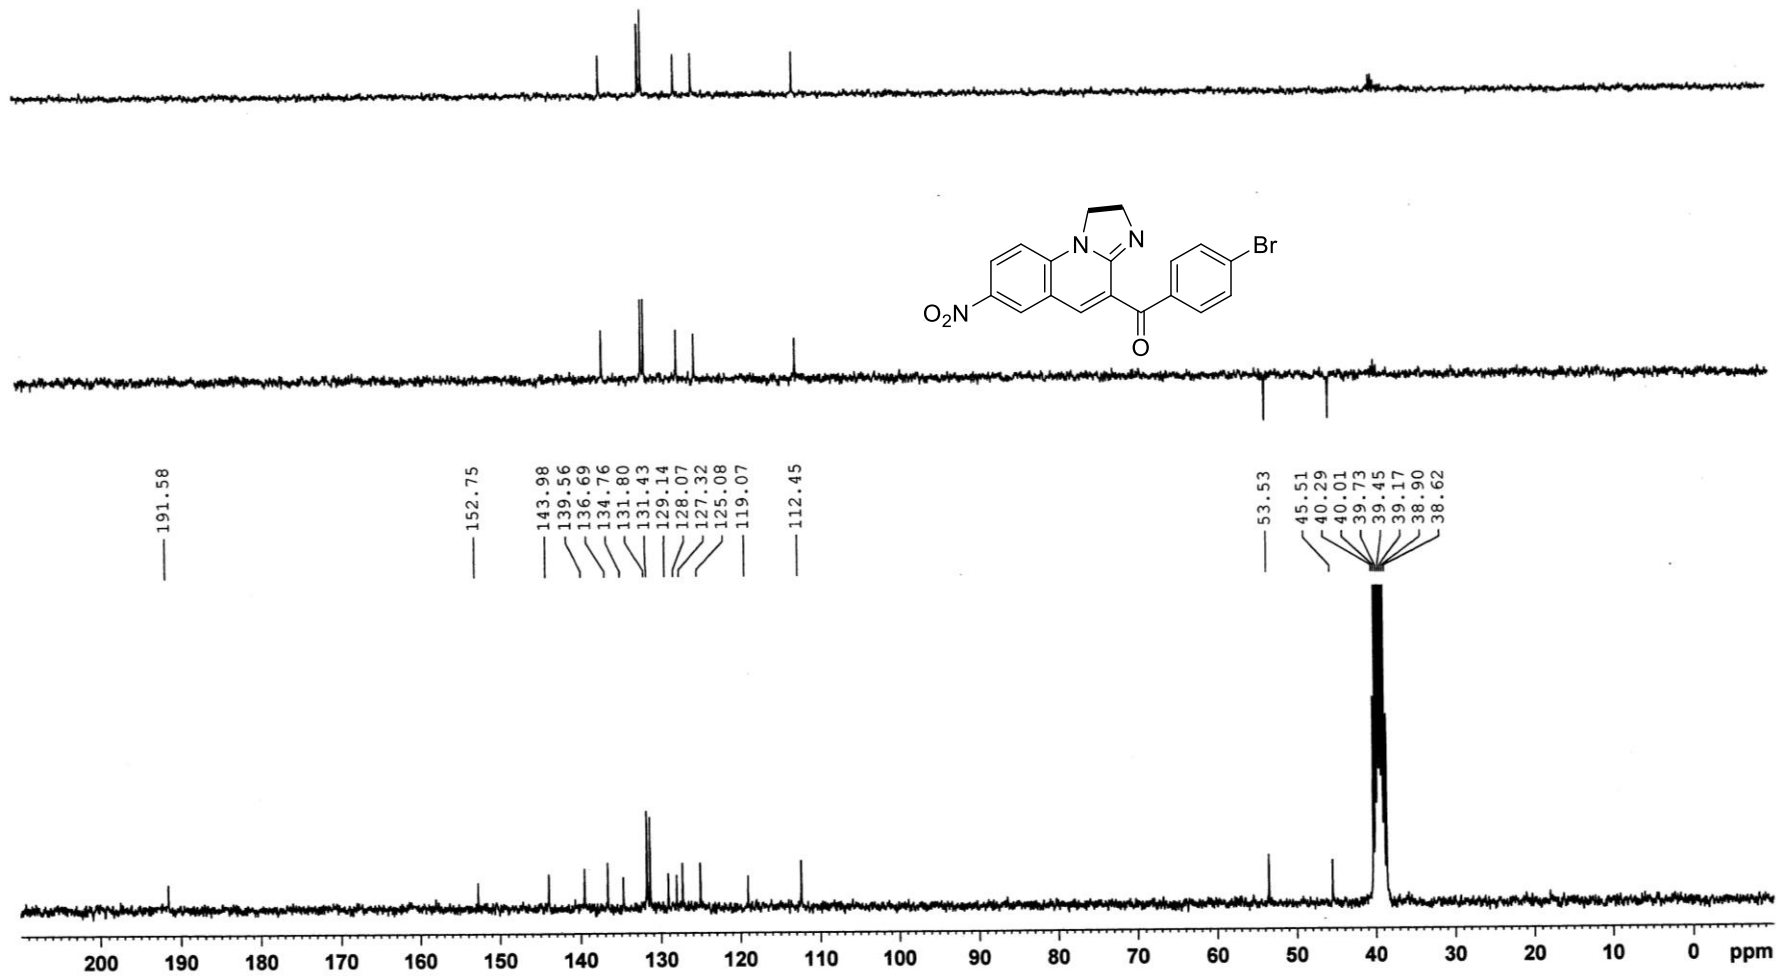

Figure S7  $^{13}\text{C}$  NMR (75 MHz,  $\text{DMSO-}d_6$ ) spectra of compound 3ac

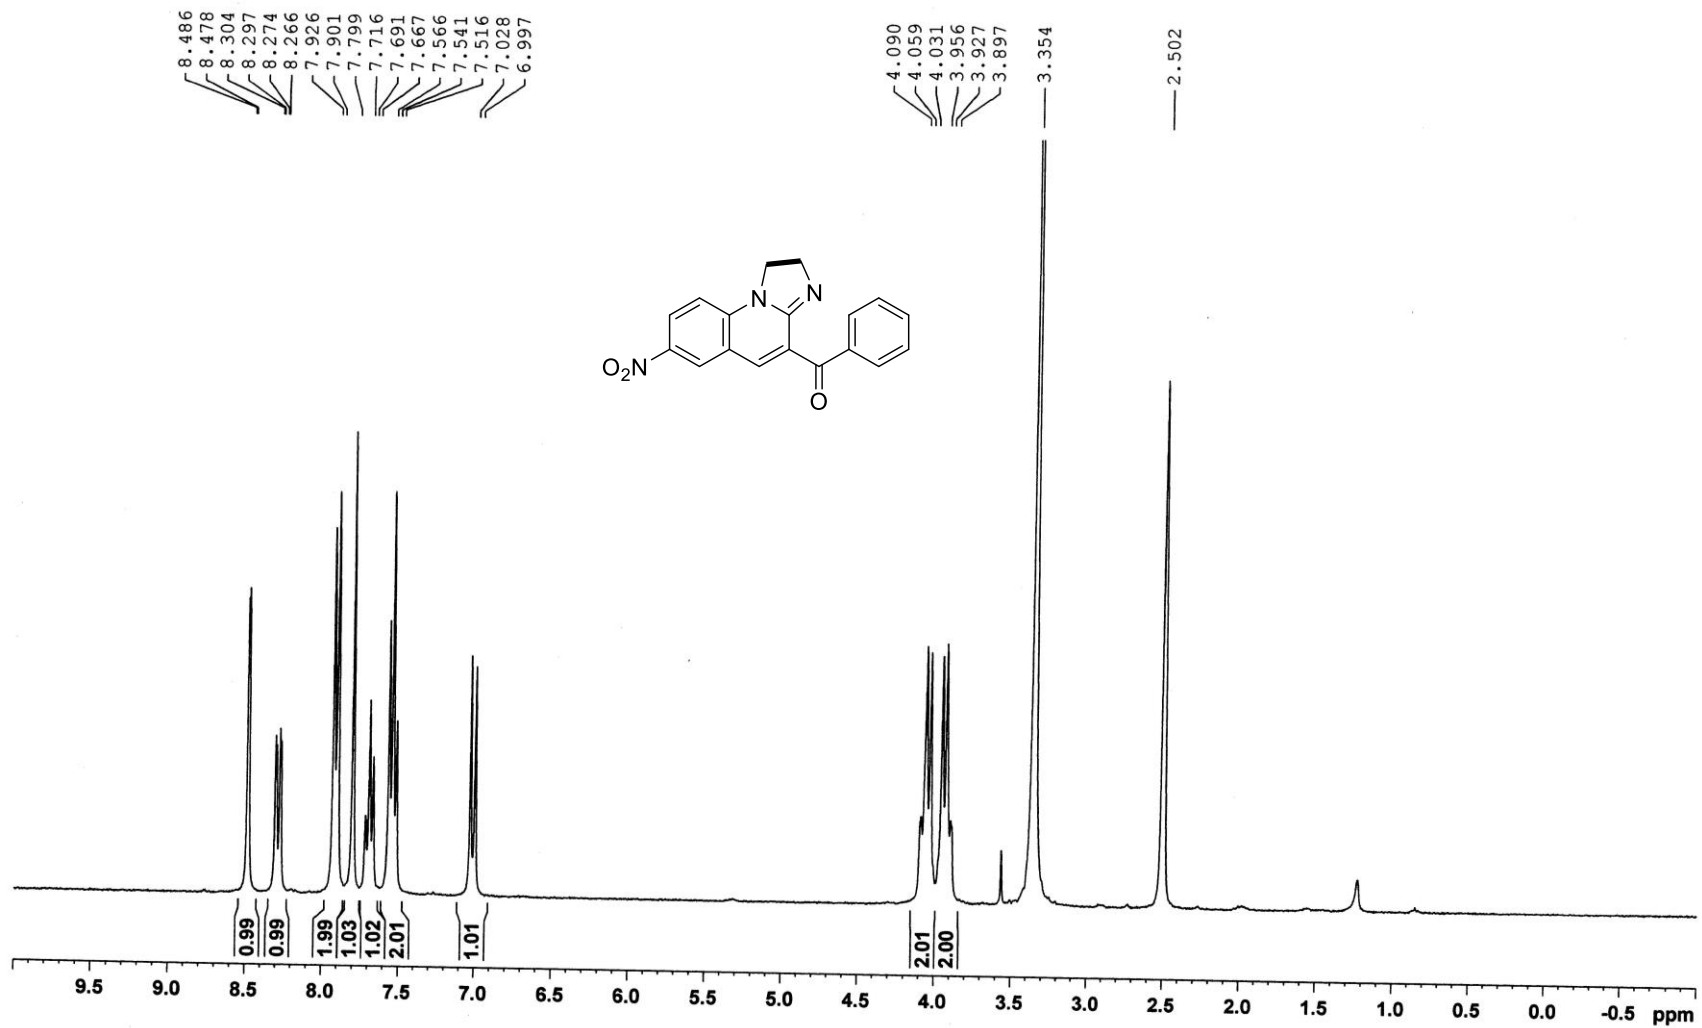

Figure S8. <sup>1</sup>H NMR (300 MHz, DMSO-*d*<sub>6</sub>) spectra of compound **3ad**

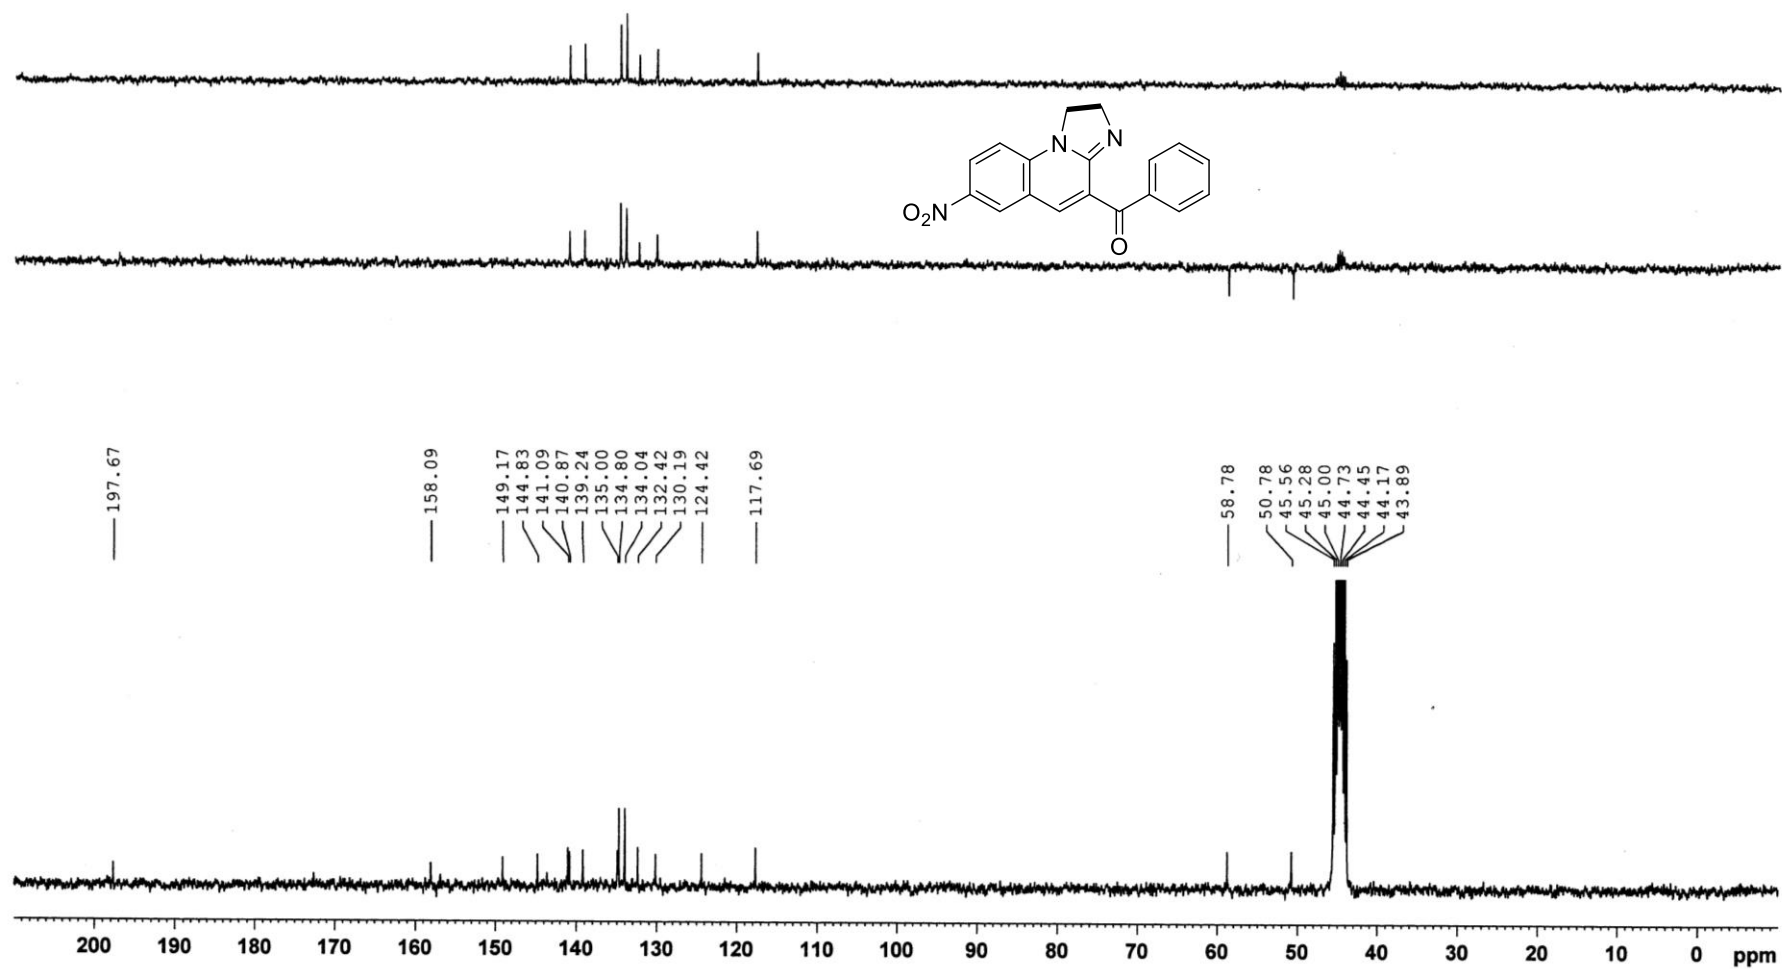

Figure S9.  $^{13}\text{C}$  NMR (75 MHz, DMSO- $d_6$ ) spectra of compound 3ad



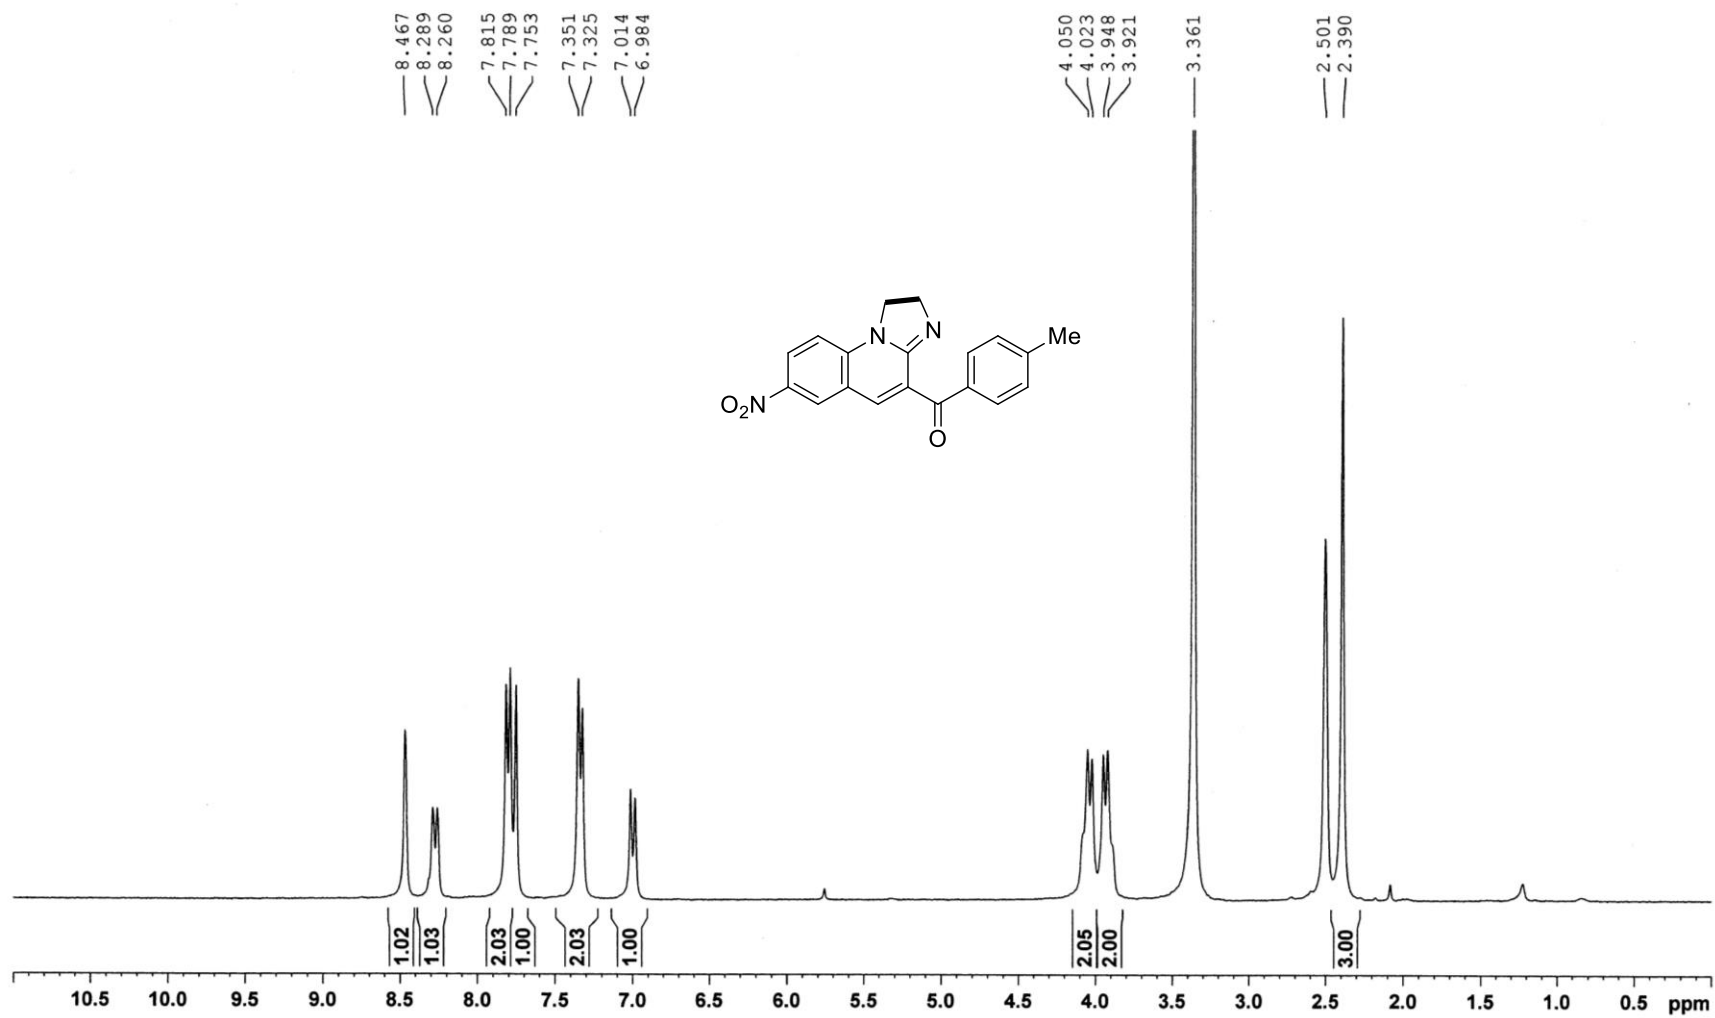

Figure S10. <sup>1</sup>H NMR (300 MHz, DMSO-*d*<sub>6</sub>) spectra of compound 3ae

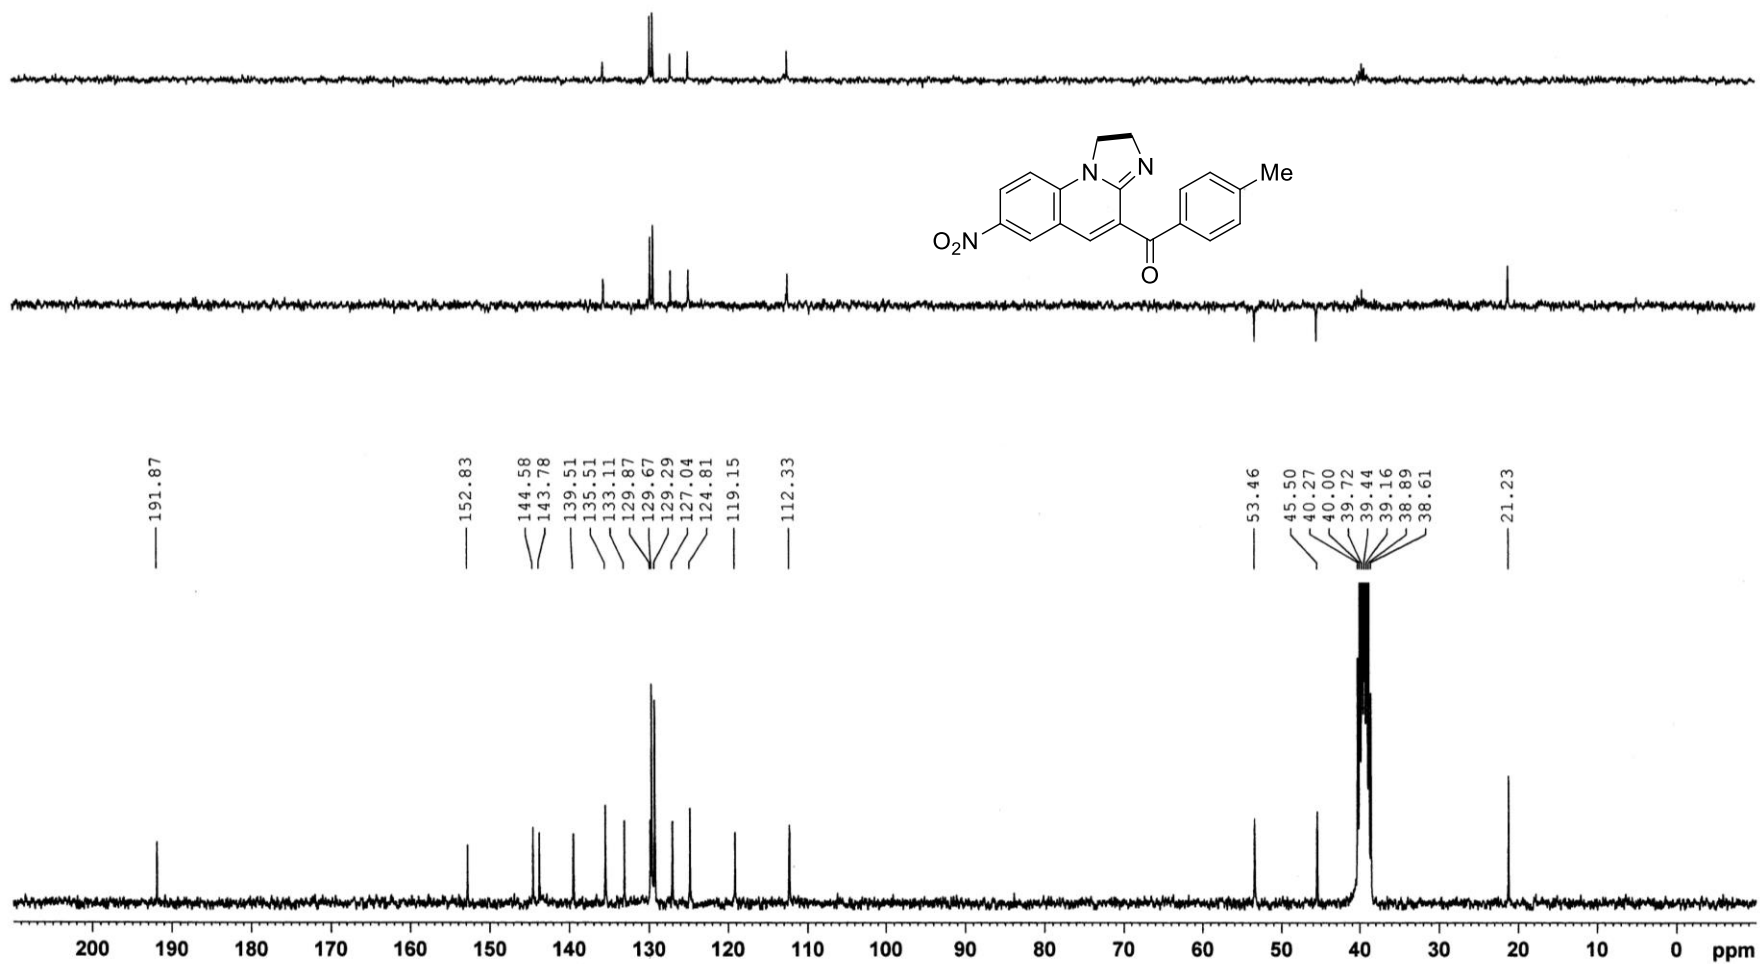

Figure S11.  $^{13}\text{C}$  NMR (75 MHz, DMSO- $d_6$ ) spectra of compound 3ae

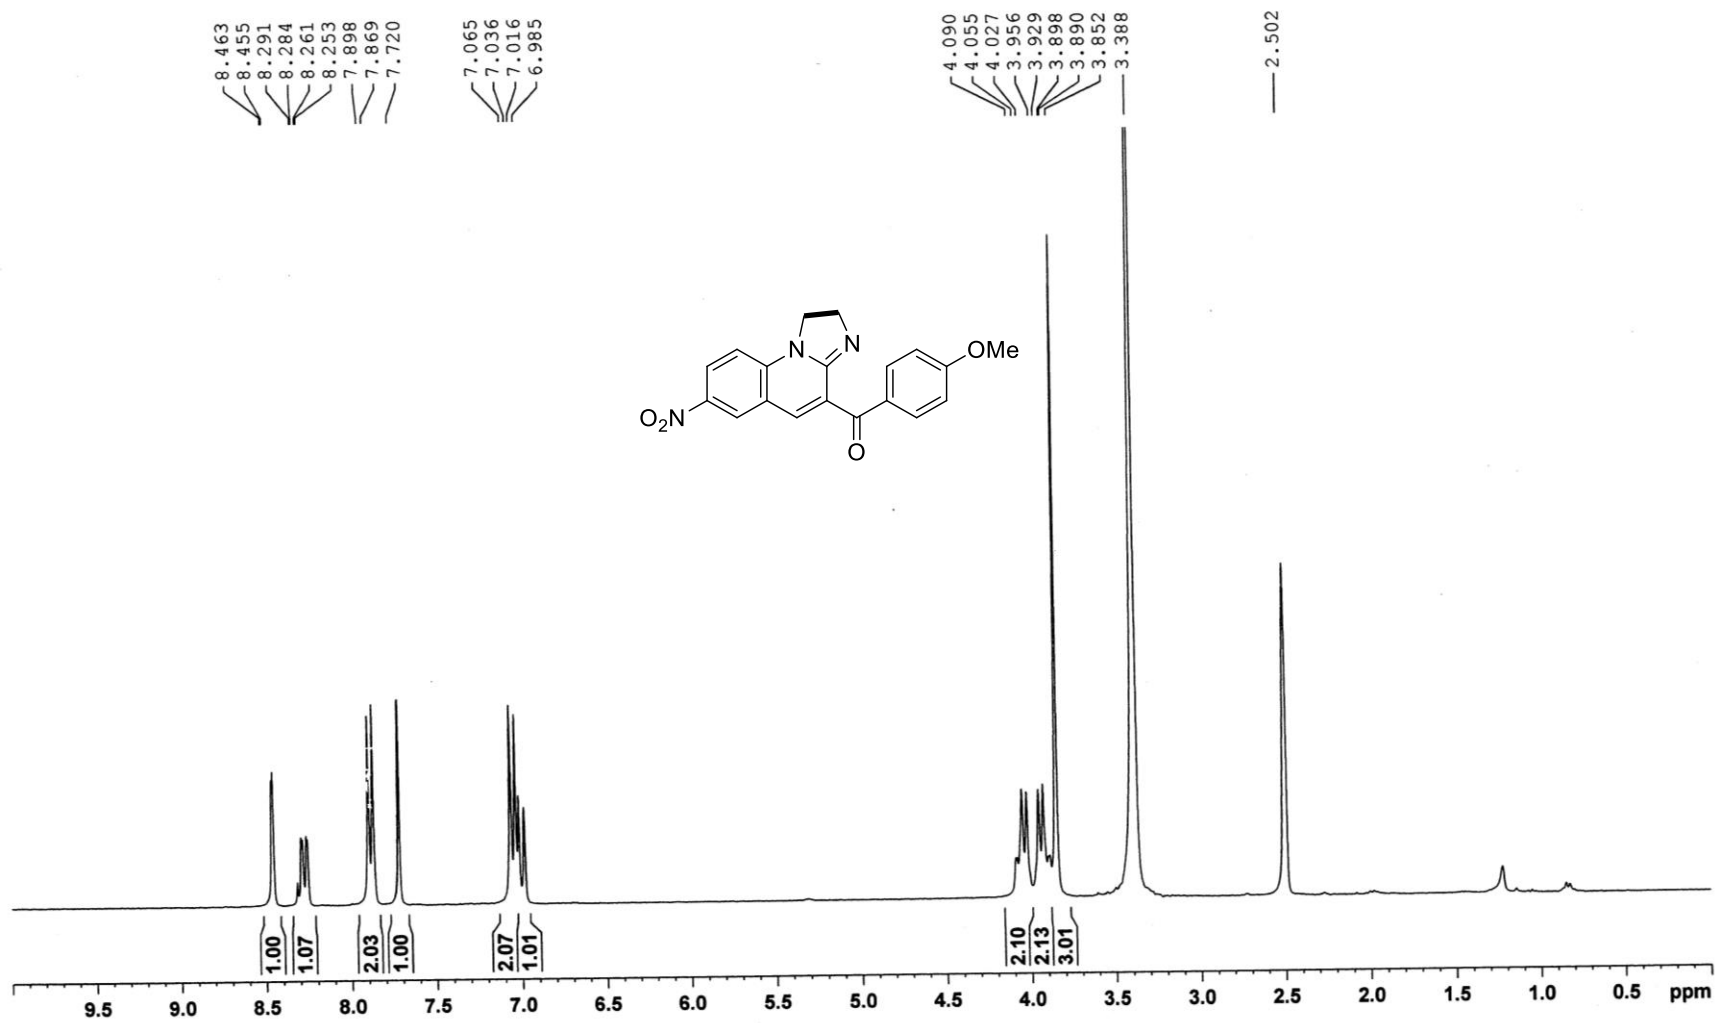

Figure S12.  $^1\text{H}$  NMR (300 MHz,  $\text{DMSO-}d_6$ ) spectra of compound **3af**

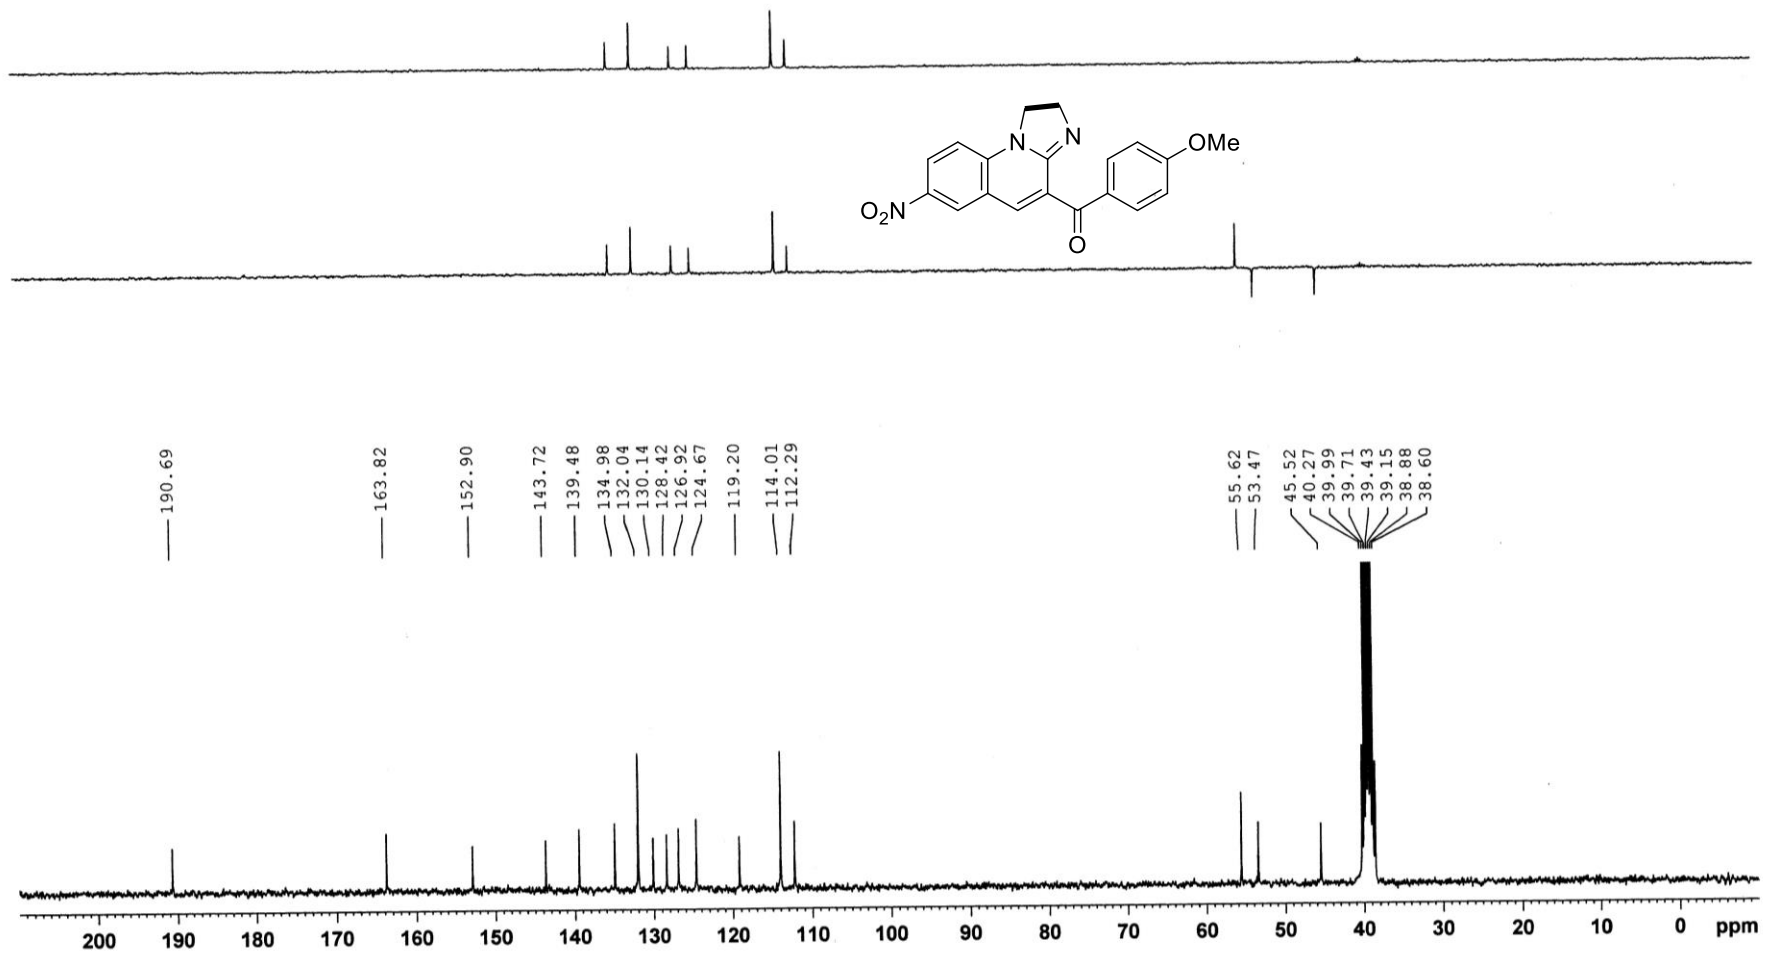

Figure S13. <sup>13</sup>C NMR (75 MHz, DMSO-*d*<sub>6</sub>) spectra of compound 3af

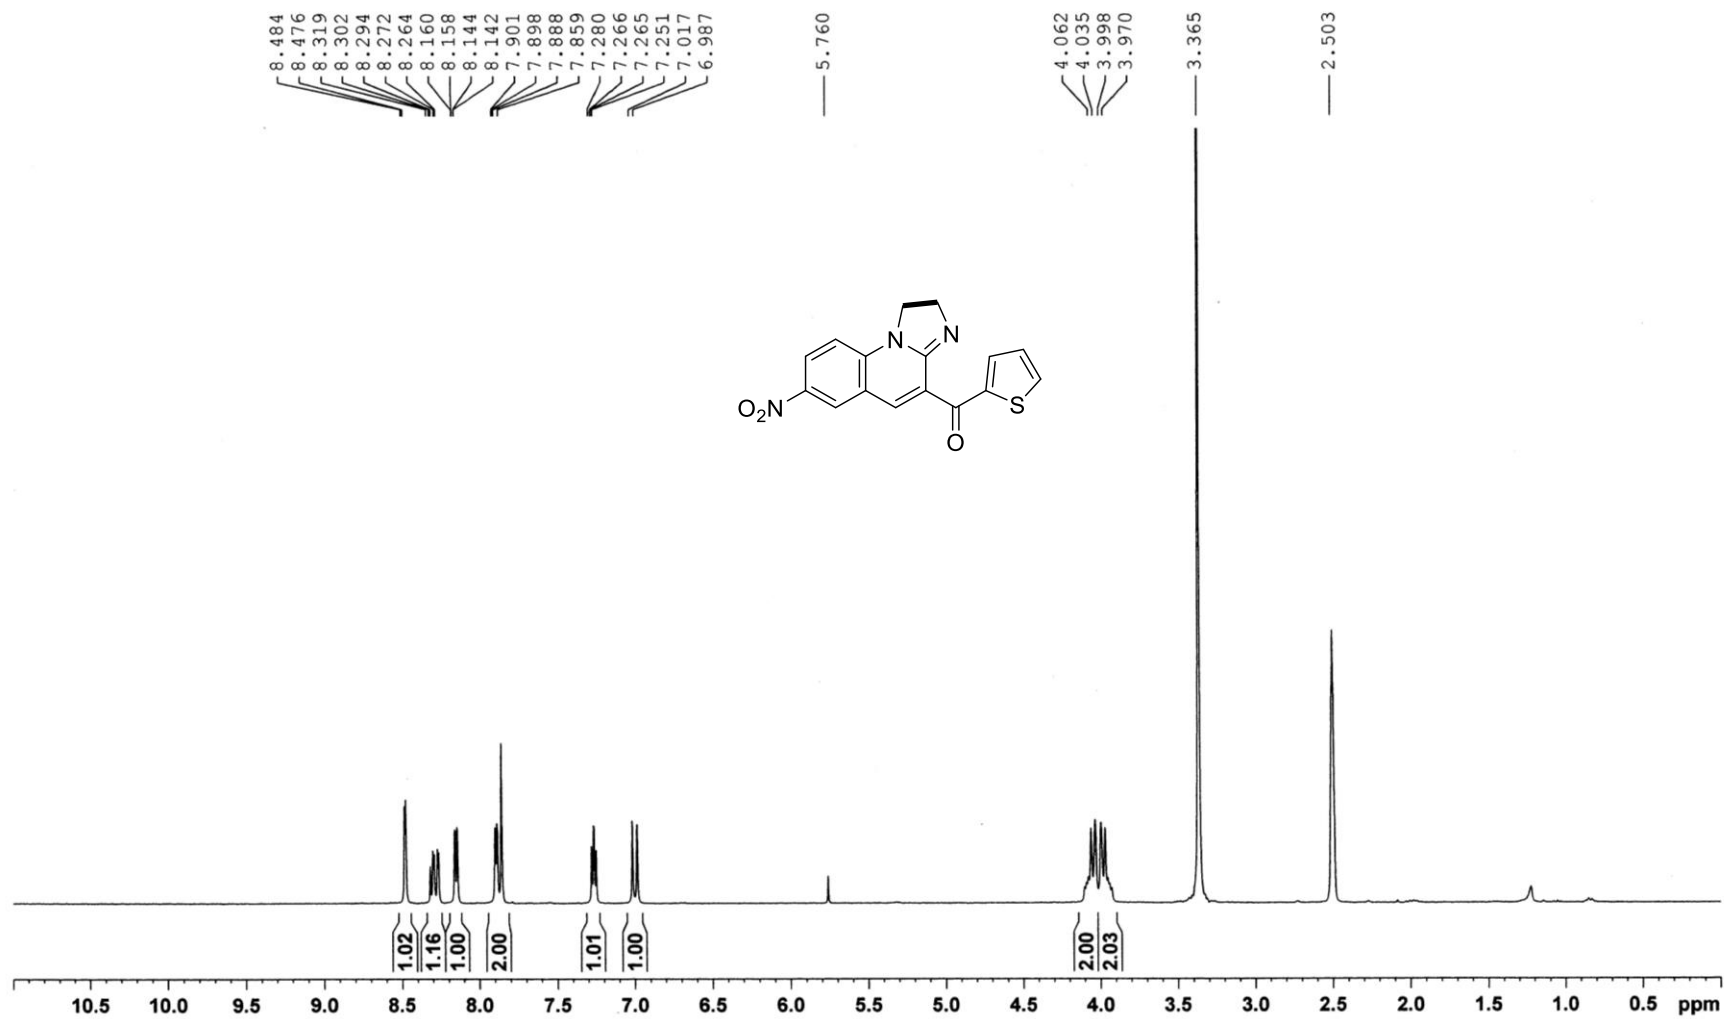

Figure S14. <sup>1</sup>H NMR (300 MHz, DMSO-*d*<sub>6</sub>) spectra of compound **3ag**

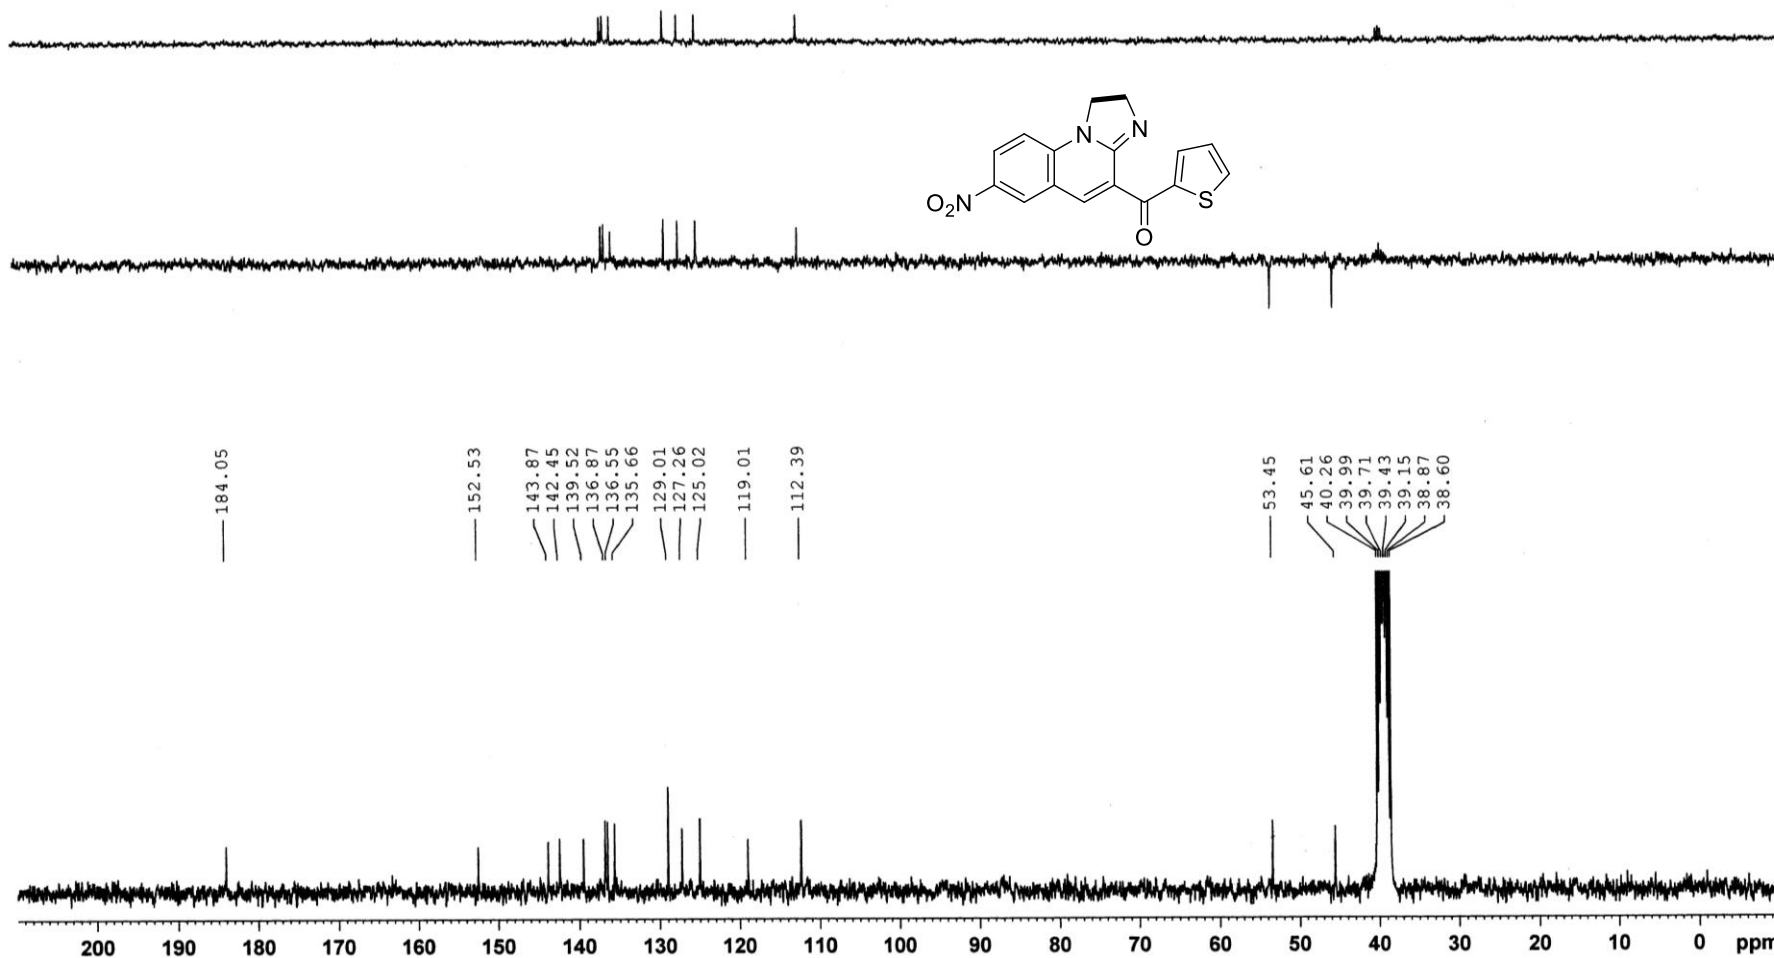

Figure S15. <sup>13</sup>C NMR (75 MHz, DMSO-*d*<sub>6</sub>) spectra of compound 3ag

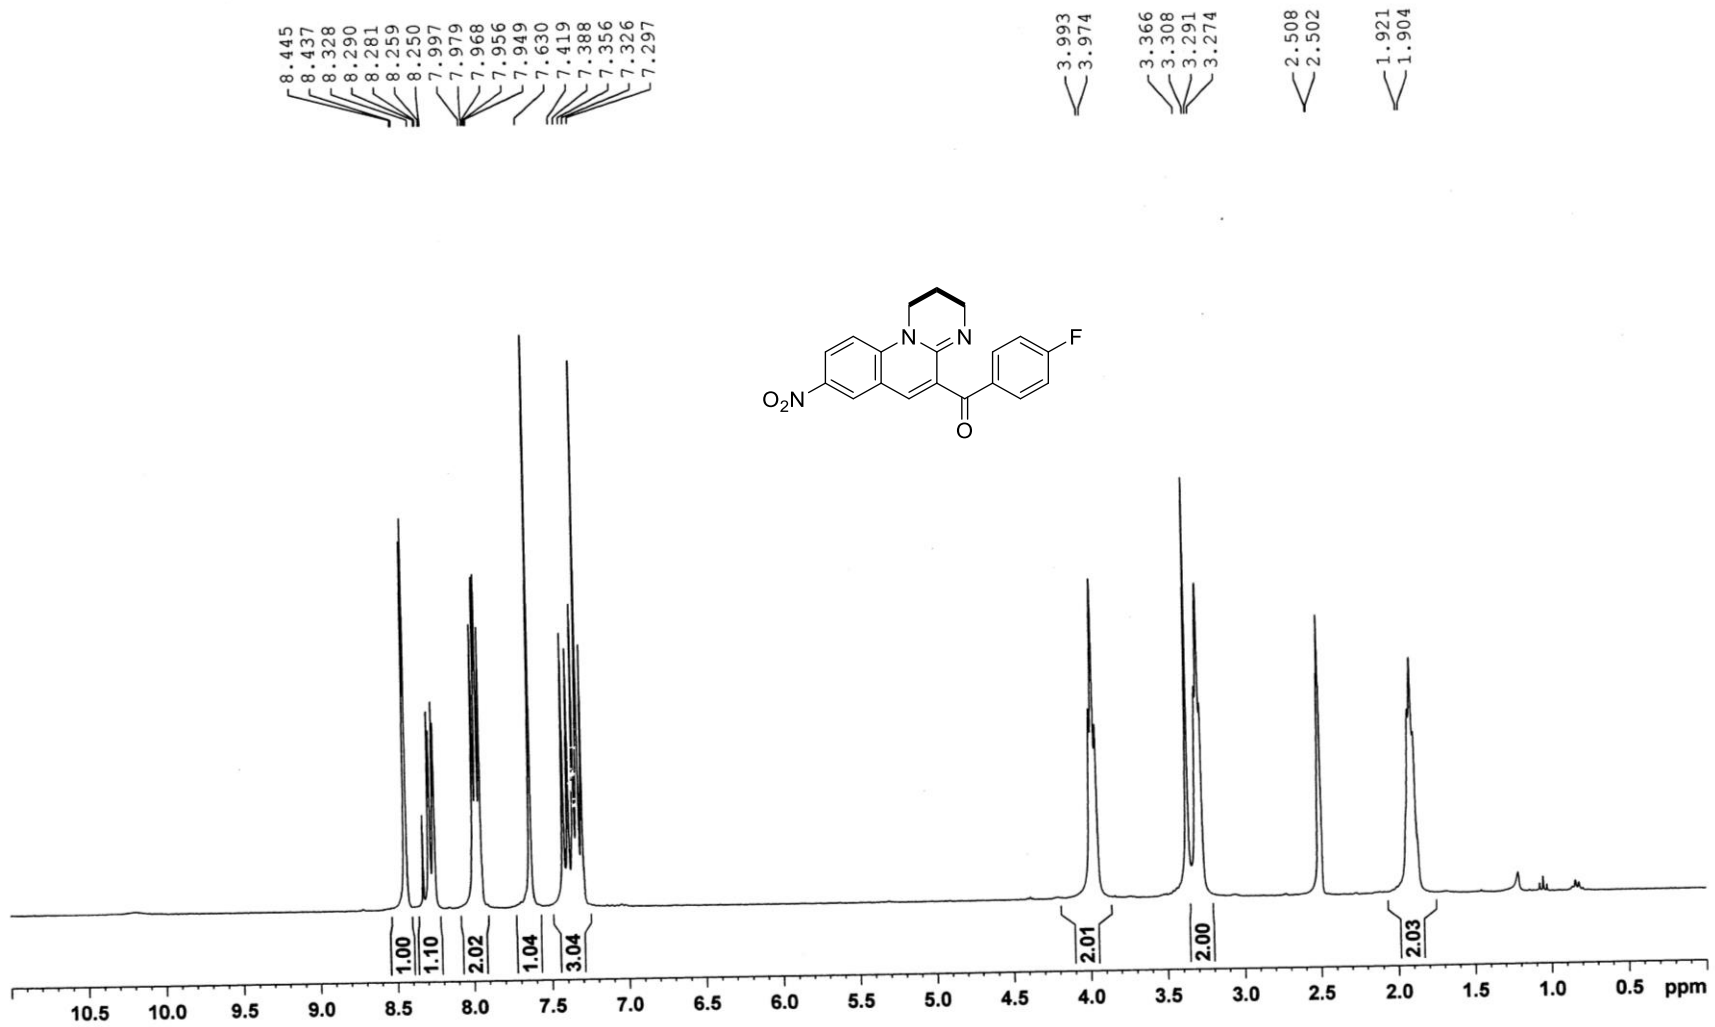

Figure S16. <sup>1</sup>H NMR (300 MHz, DMSO-*d*<sub>6</sub>) spectra of compound 3ah

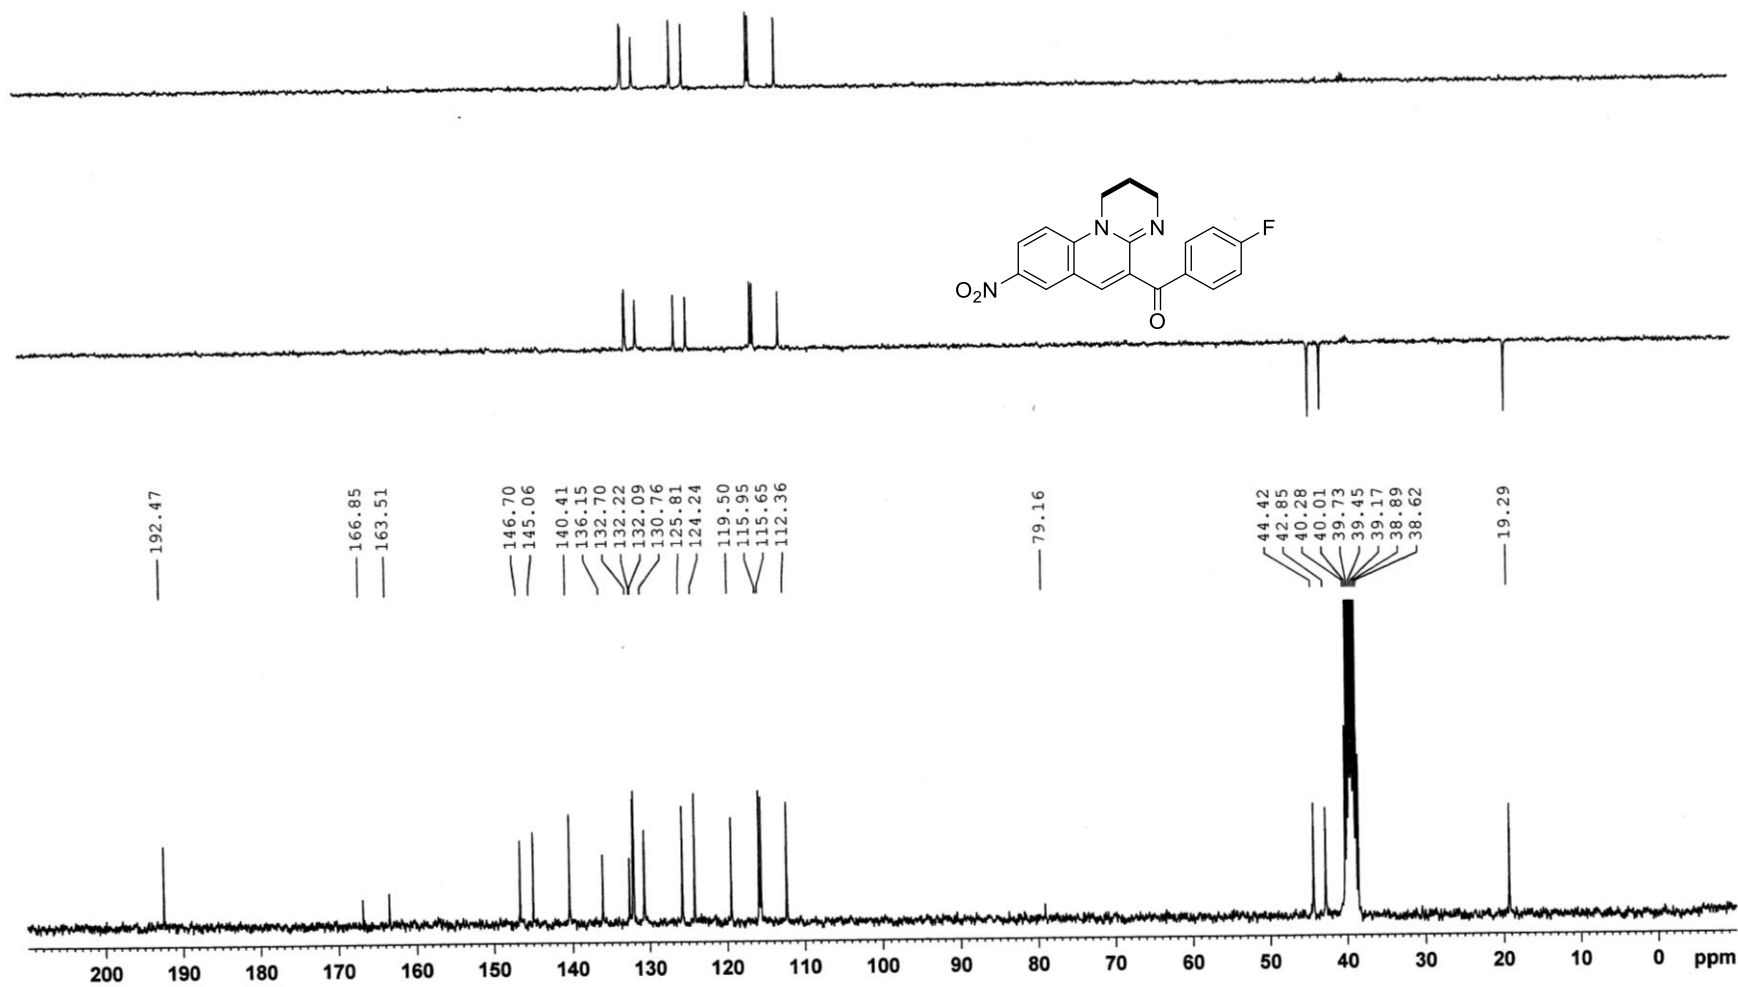

Figure S17.  $^{13}\text{C}$  NMR (75 MHz, DMSO- $d_6$ ) spectra of compound 3ah



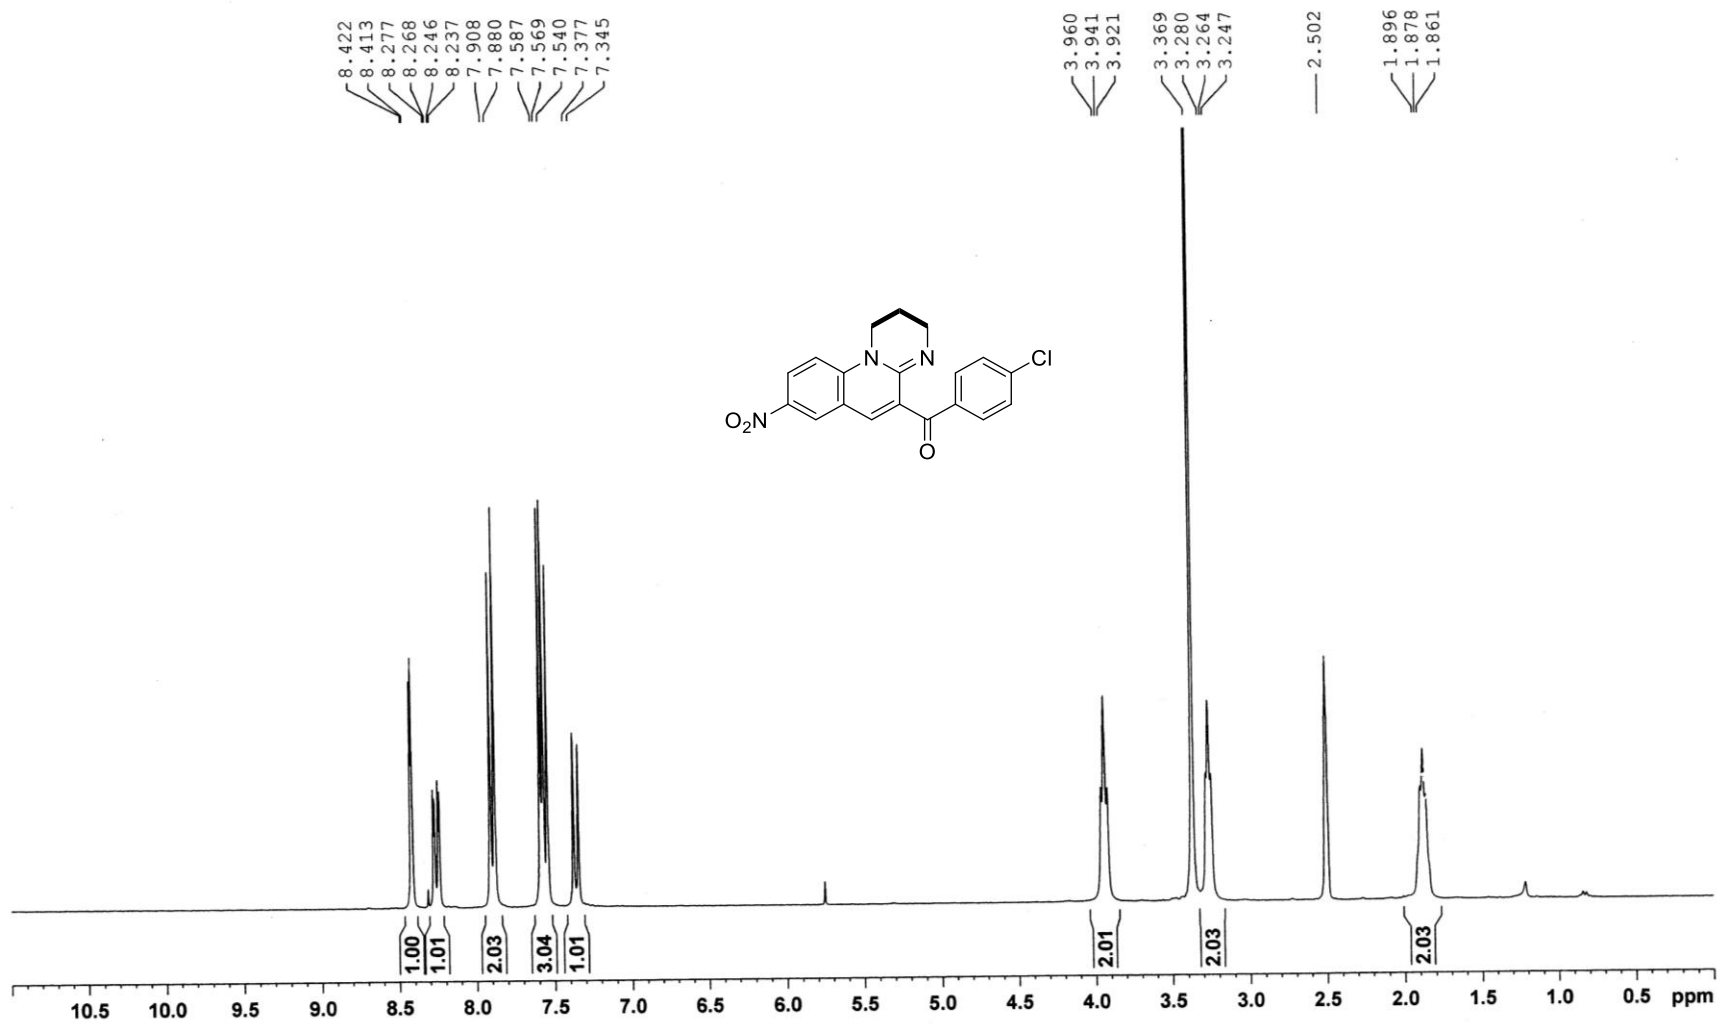

Figure S18.  $^1\text{H}$  NMR (300 MHz,  $\text{DMSO-}d_6$ ) spectra of compound 3ai

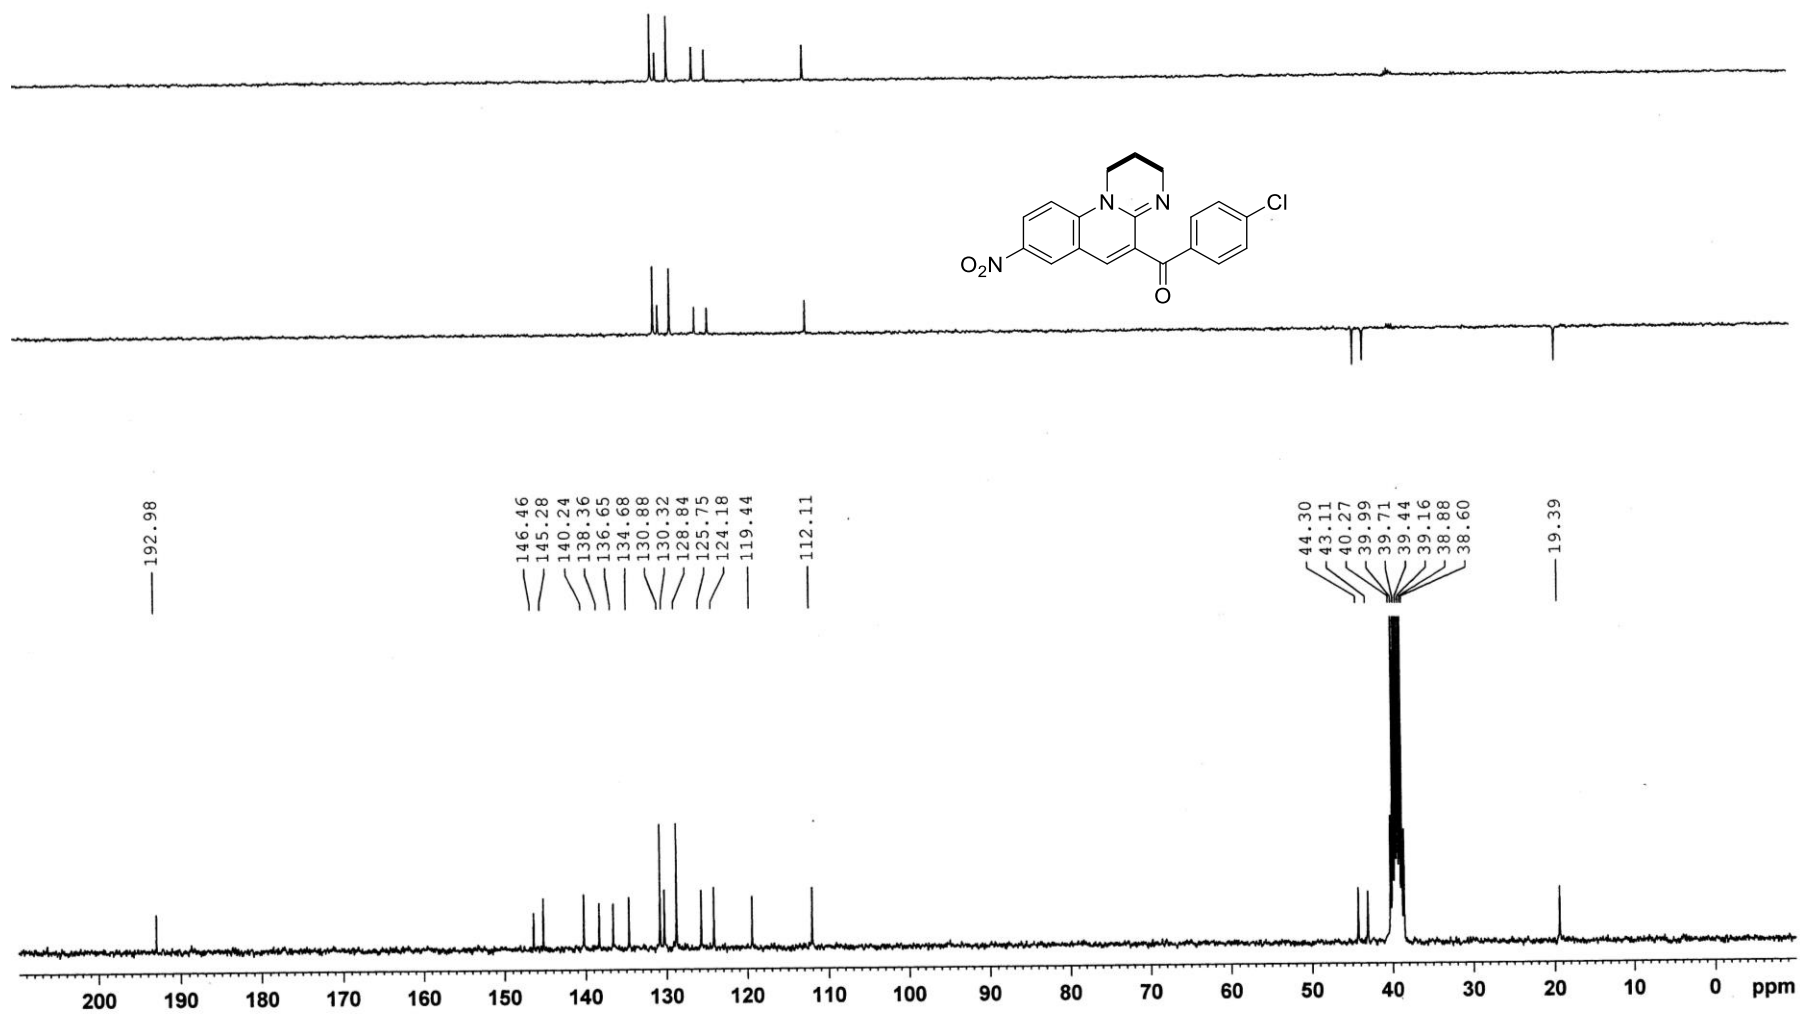

Figure S19.  $^{13}\text{C}$  NMR (75 MHz,  $\text{DMSO-}d_6$ ) spectra of compound **3ai**

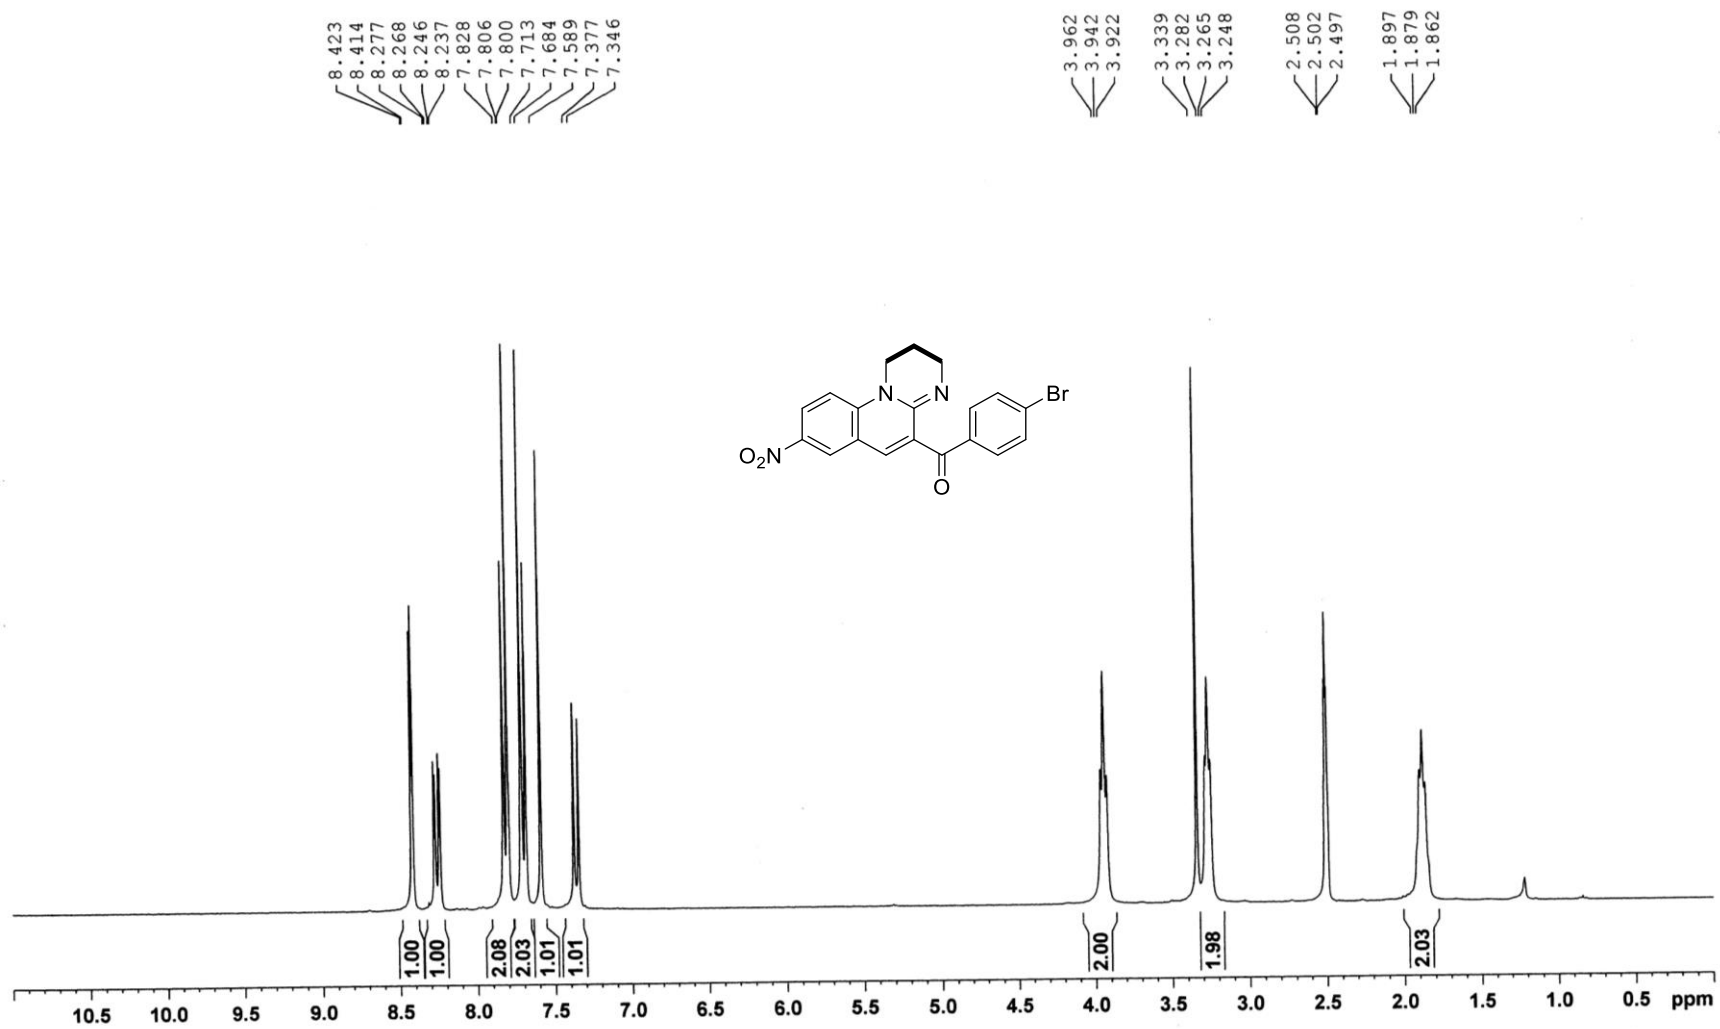

**Figure S20.** <sup>1</sup>H NMR (300 MHz, DMSO-*d*<sub>6</sub>) spectra of compound **3aj**

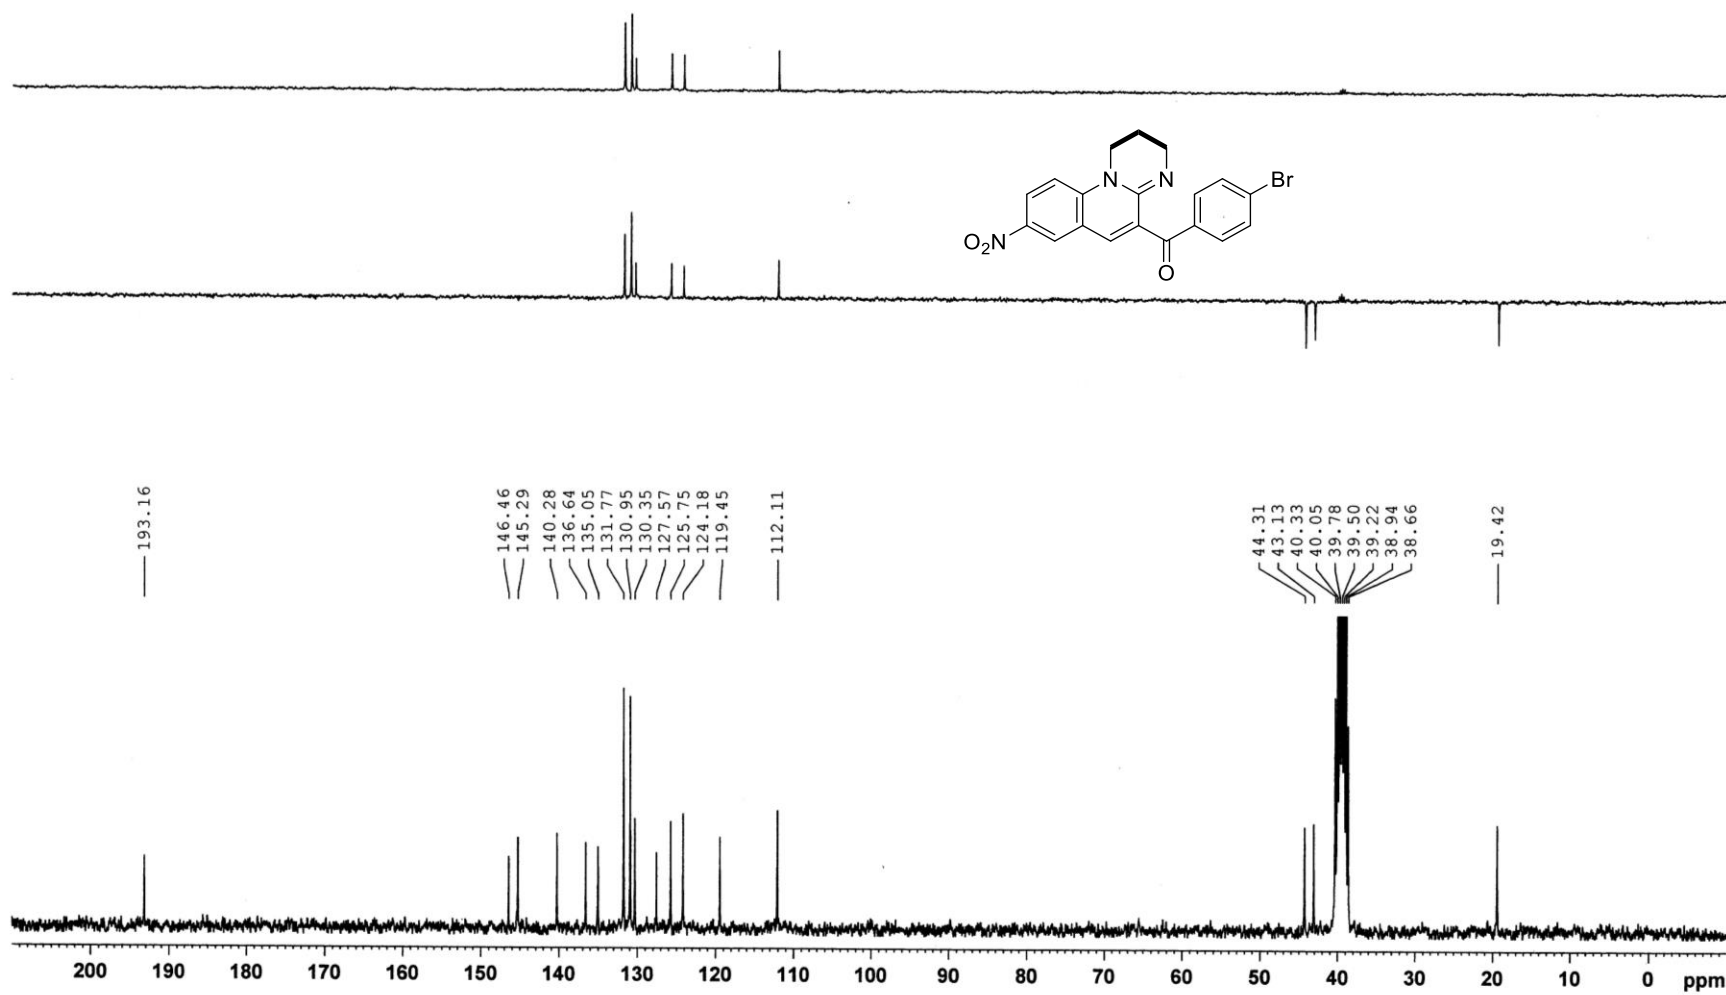

Figure S21.  $^{13}\text{C}$  NMR (75 MHz, DMSO- $d_6$ ) spectra of compound 3aj

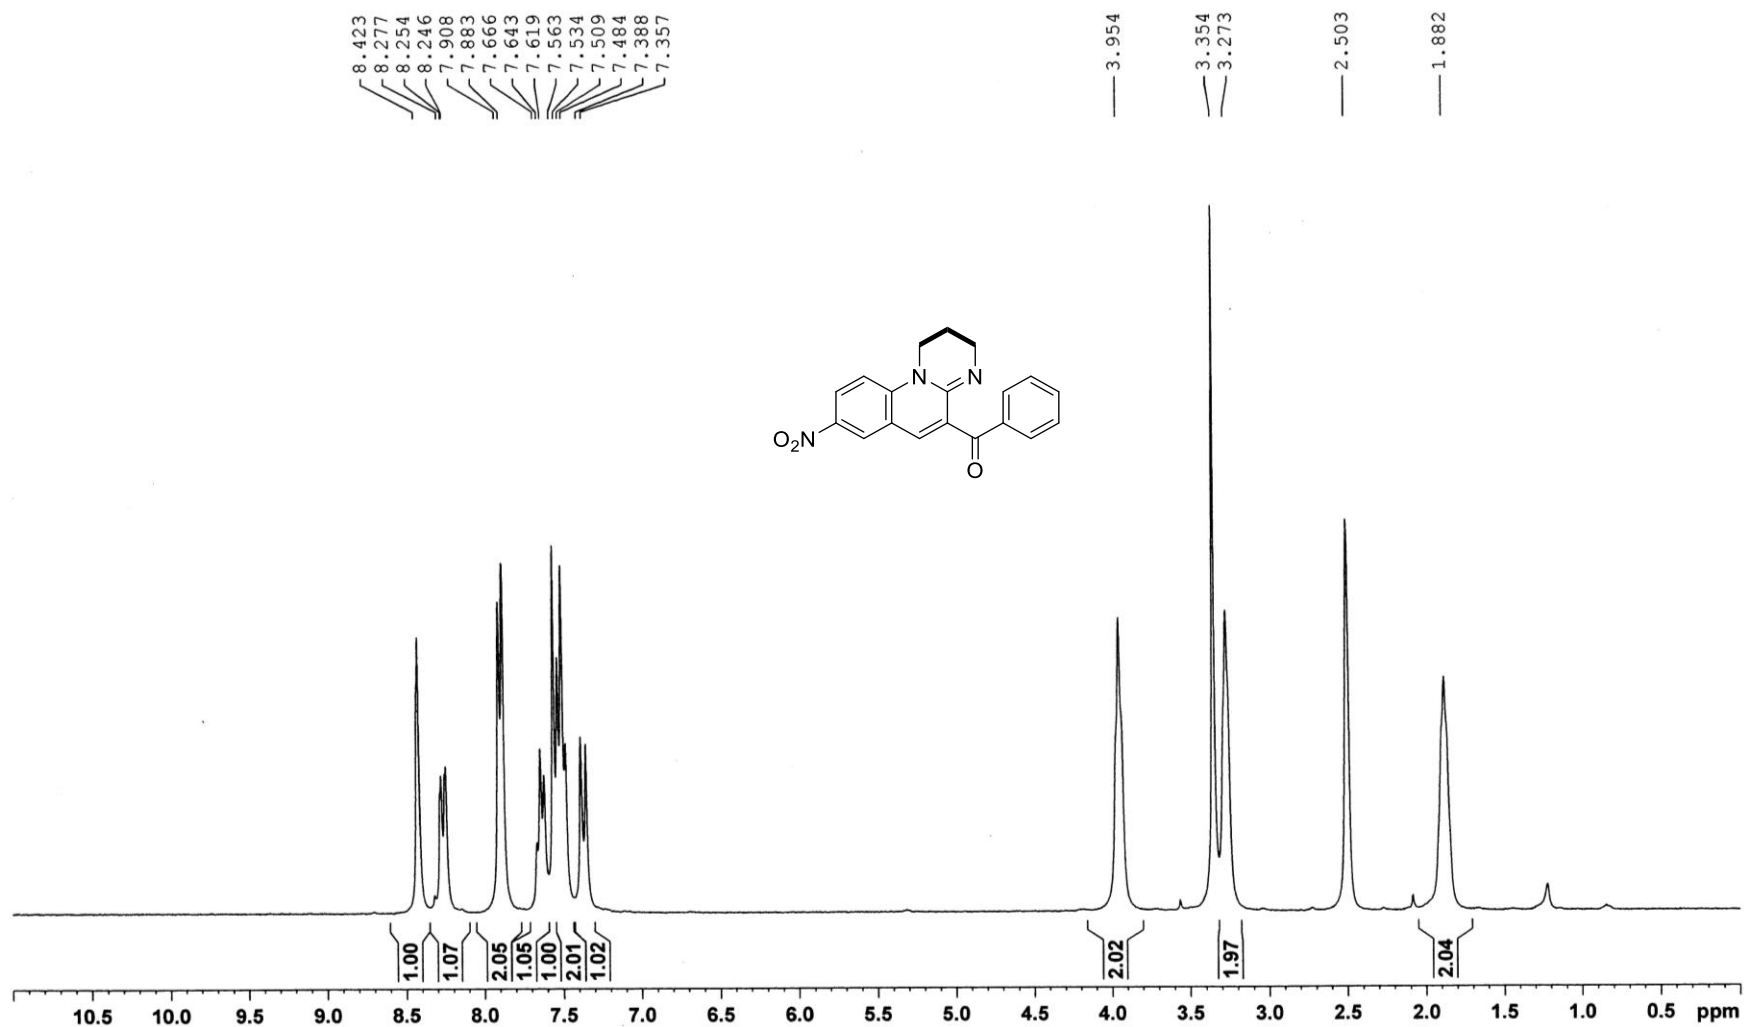

Figure S22. <sup>1</sup>H NMR (300 MHz, DMSO-*d*<sub>6</sub>) spectra of compound 3ak

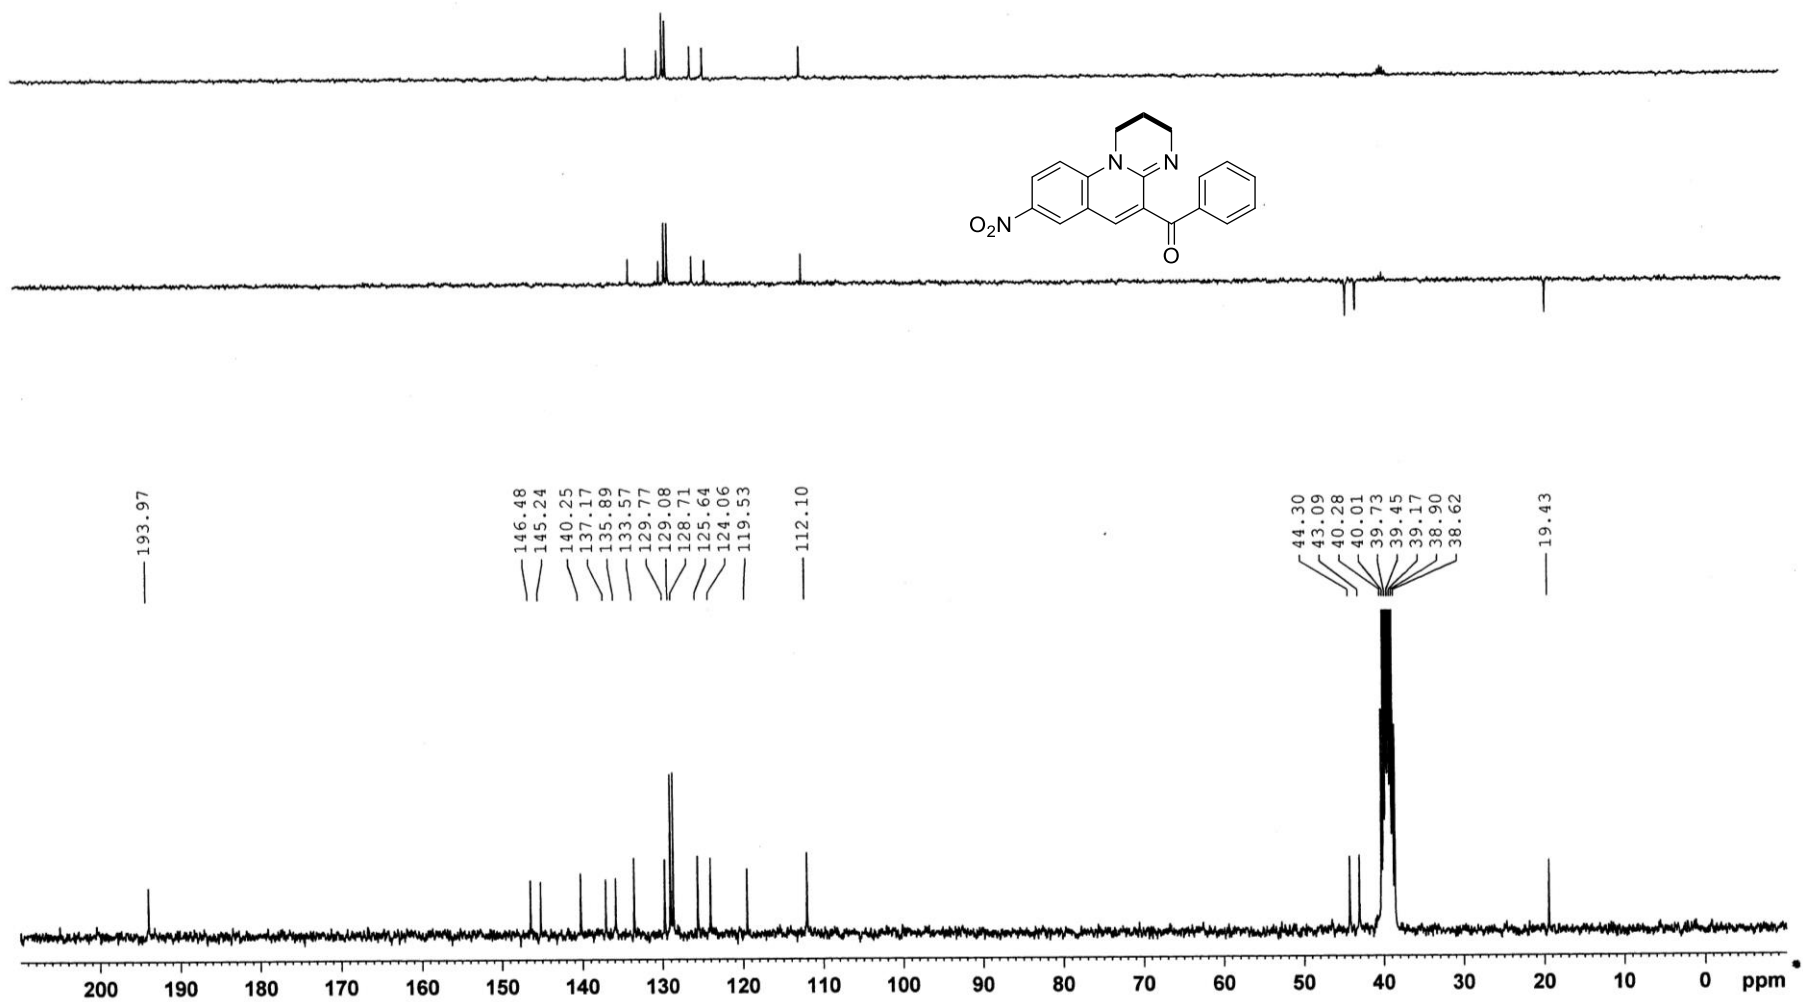

Figure S23.  $^{13}\text{C}$  NMR (75 MHz,  $\text{DMSO-}d_6$ ) spectra of compound 3ak

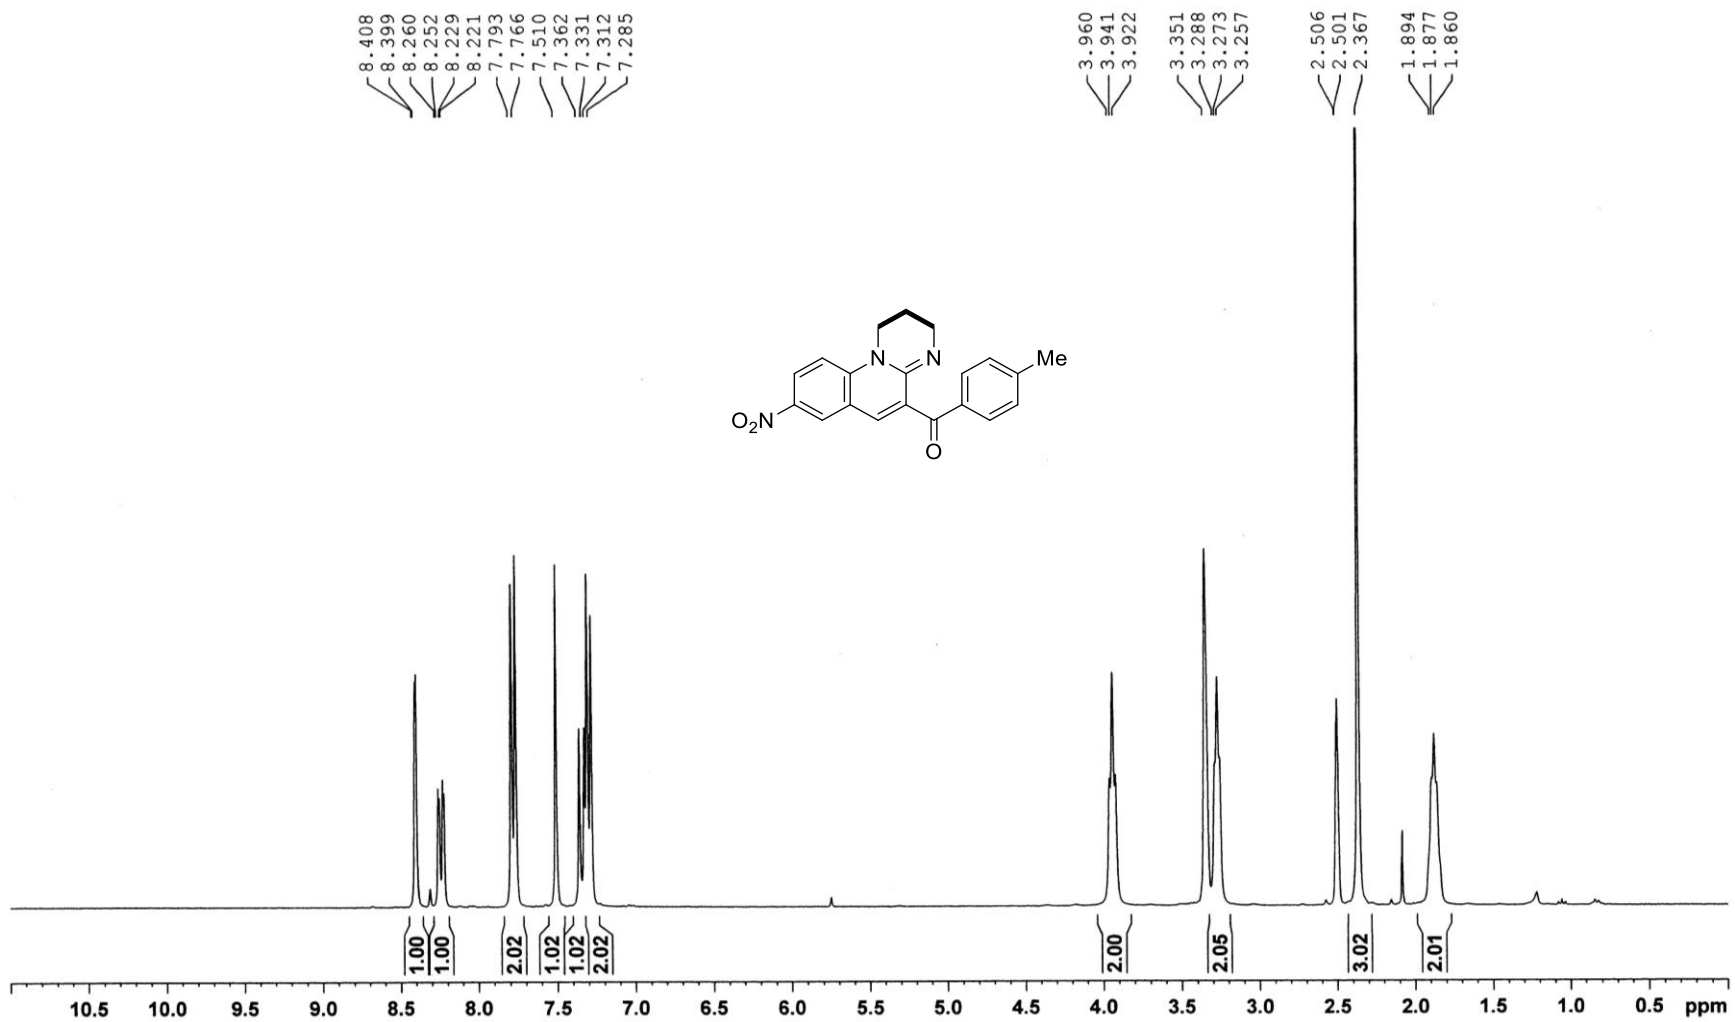

Figure S24. <sup>1</sup>H NMR (300 MHz, DMSO-*d*<sub>6</sub>) spectra of compound **3al**

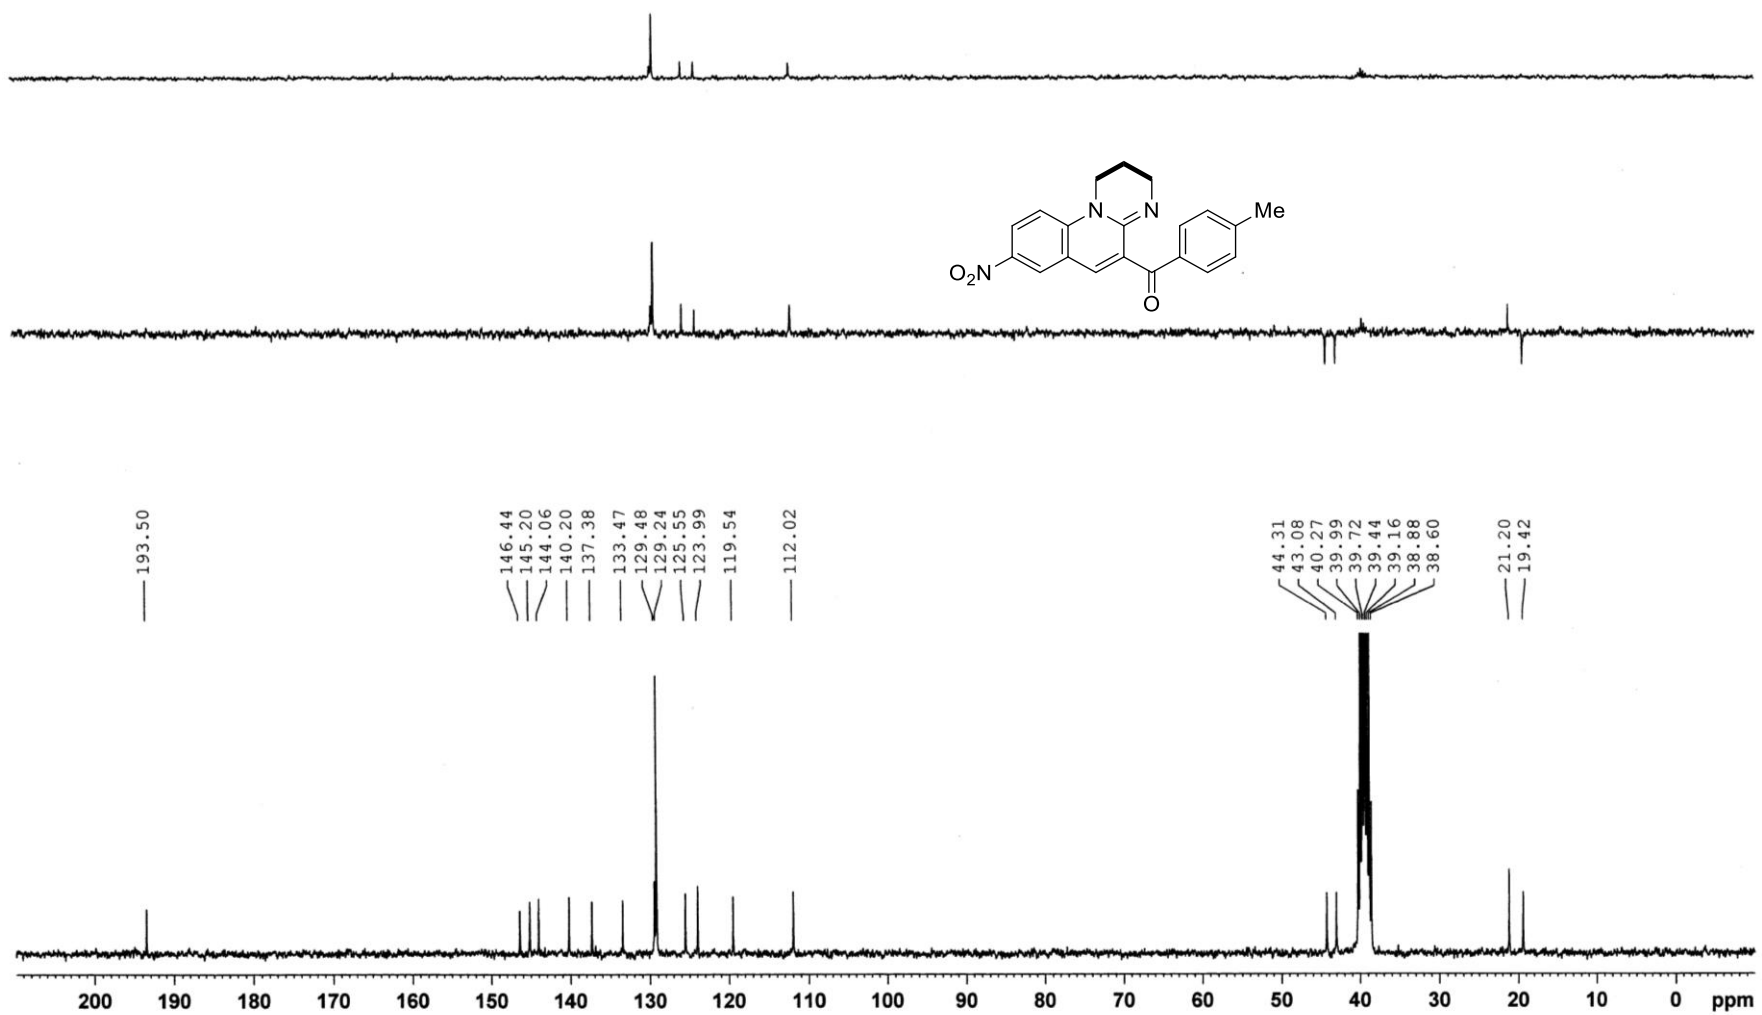

Figure S25.  $^{13}\text{C}$  NMR (75 MHz, DMSO- $d_6$ ) spectra of compound 3al



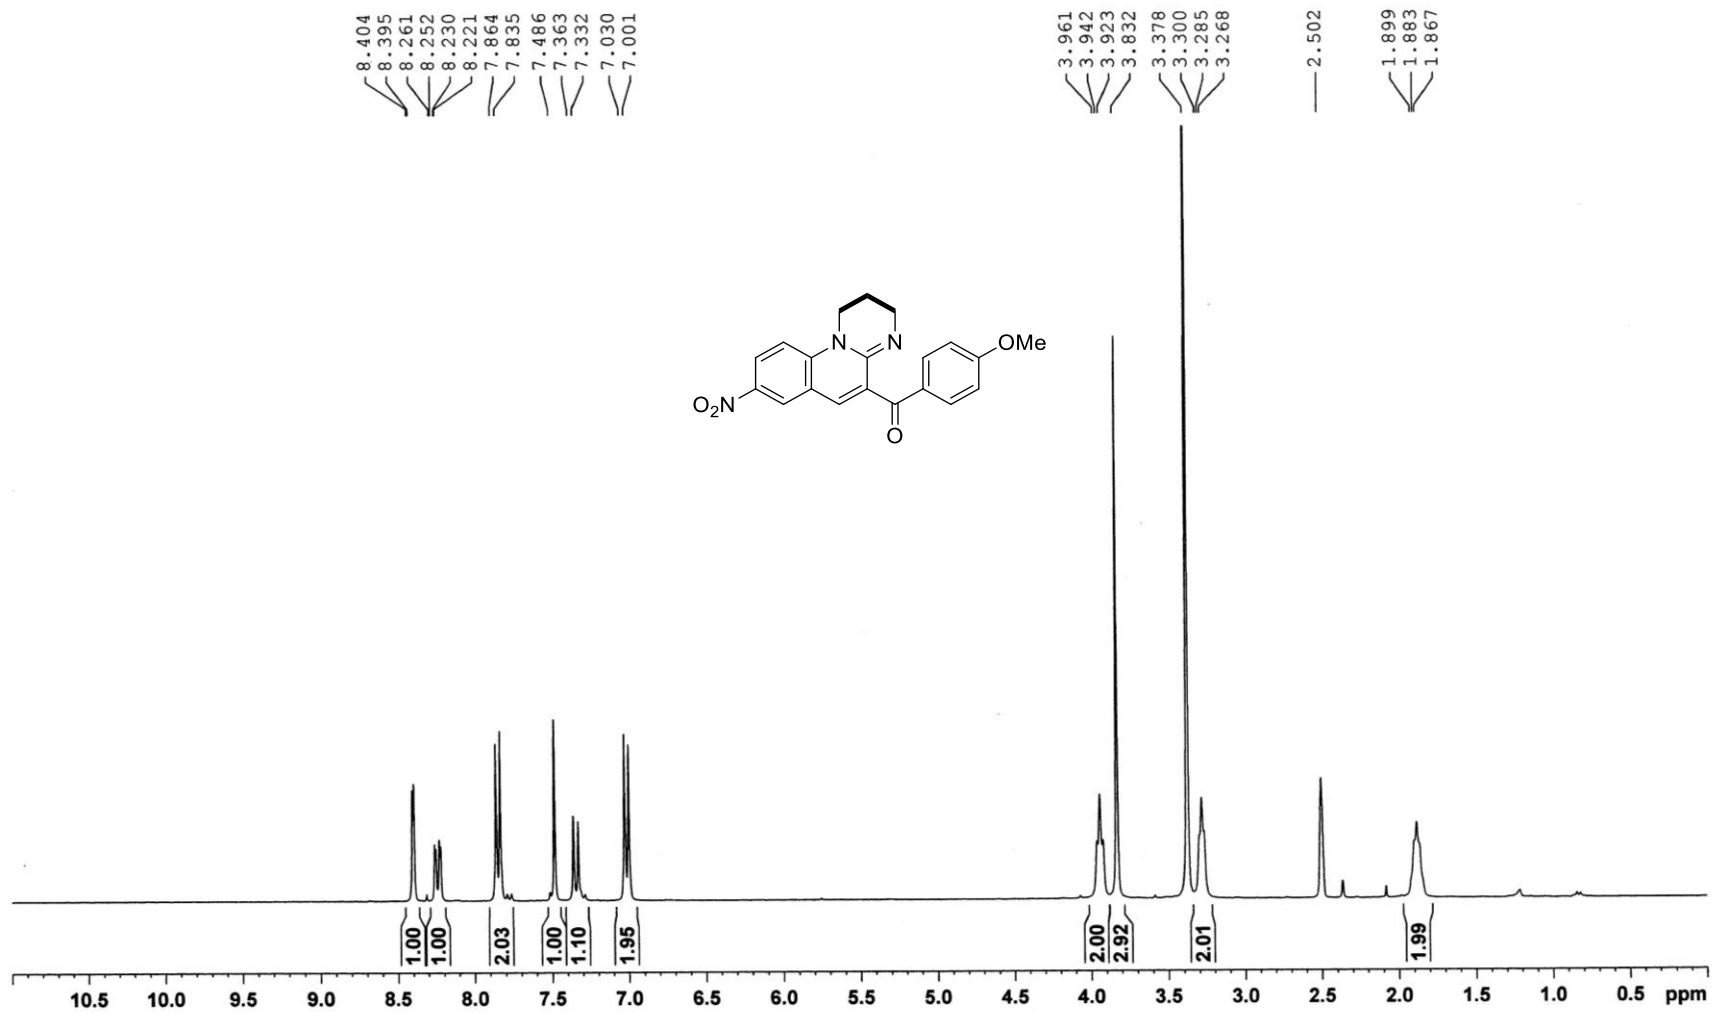

Figure S26.  $^1\text{H}$  NMR (300 MHz,  $\text{DMSO-}d_6$ ) spectra of compound **3am**

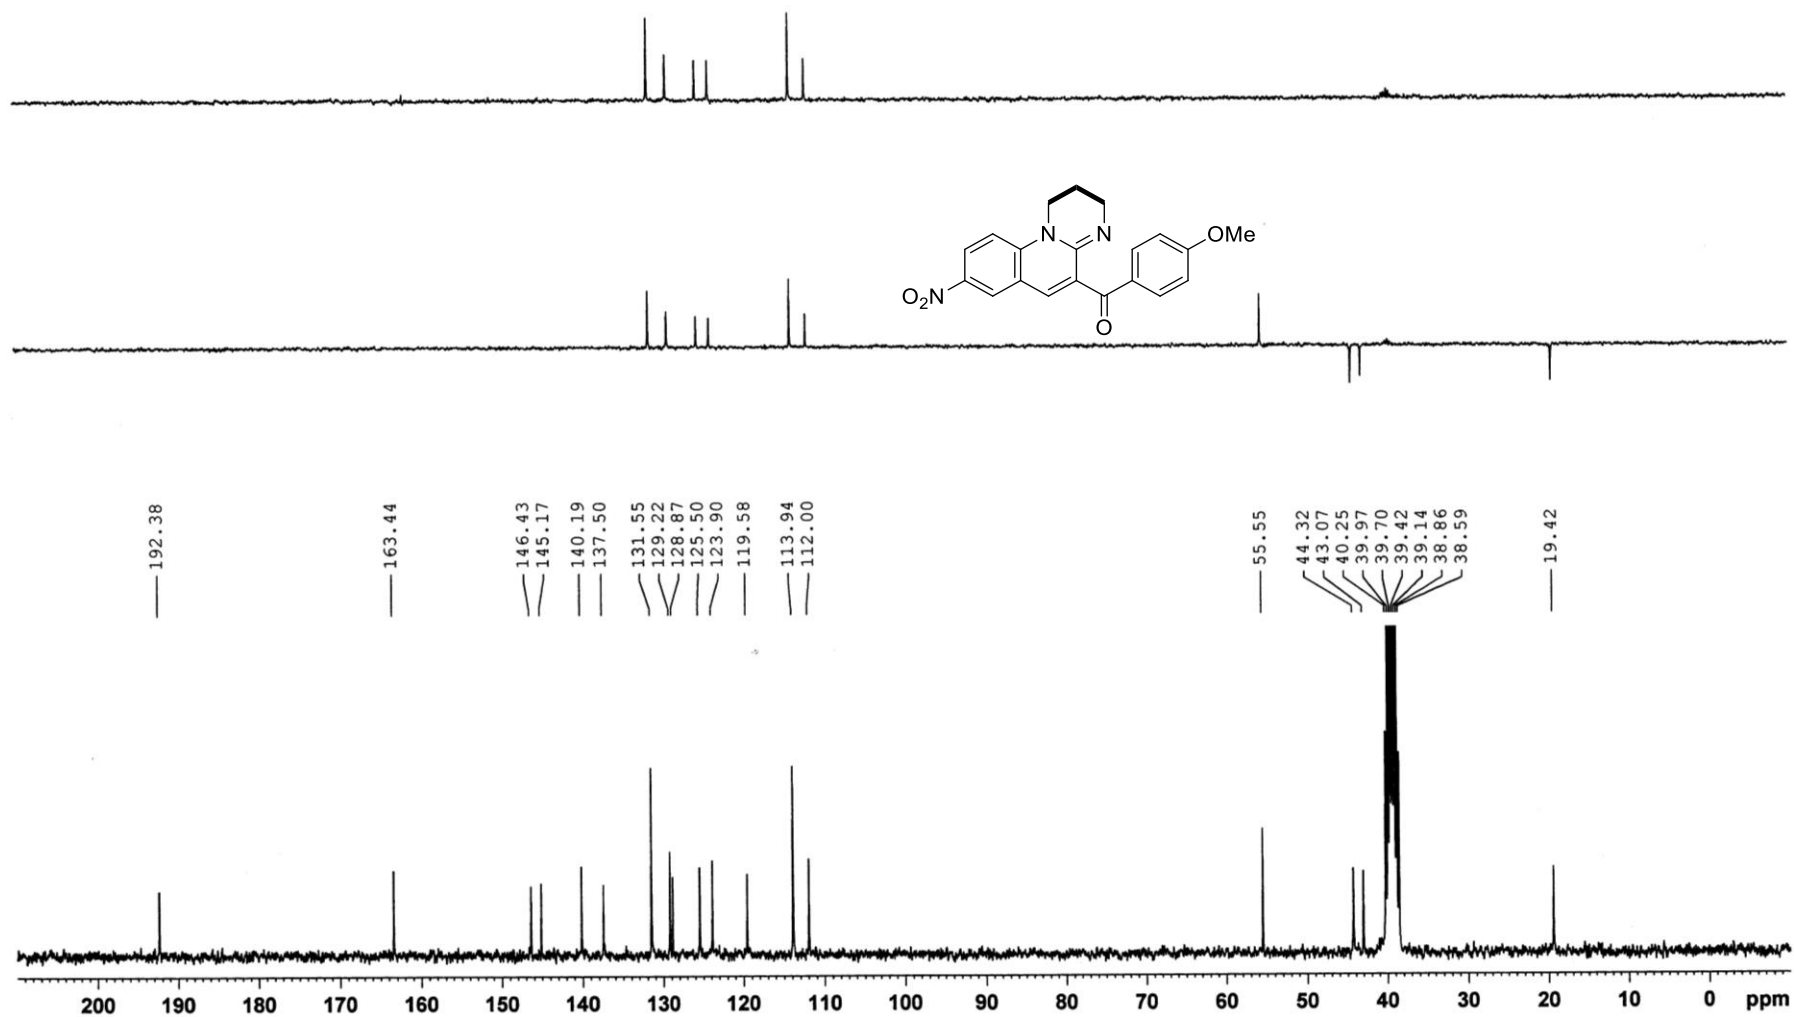

Figure S27. <sup>13</sup>C NMR (75 MHz, DMSO-*d*<sub>6</sub>) spectra of compound **3am**

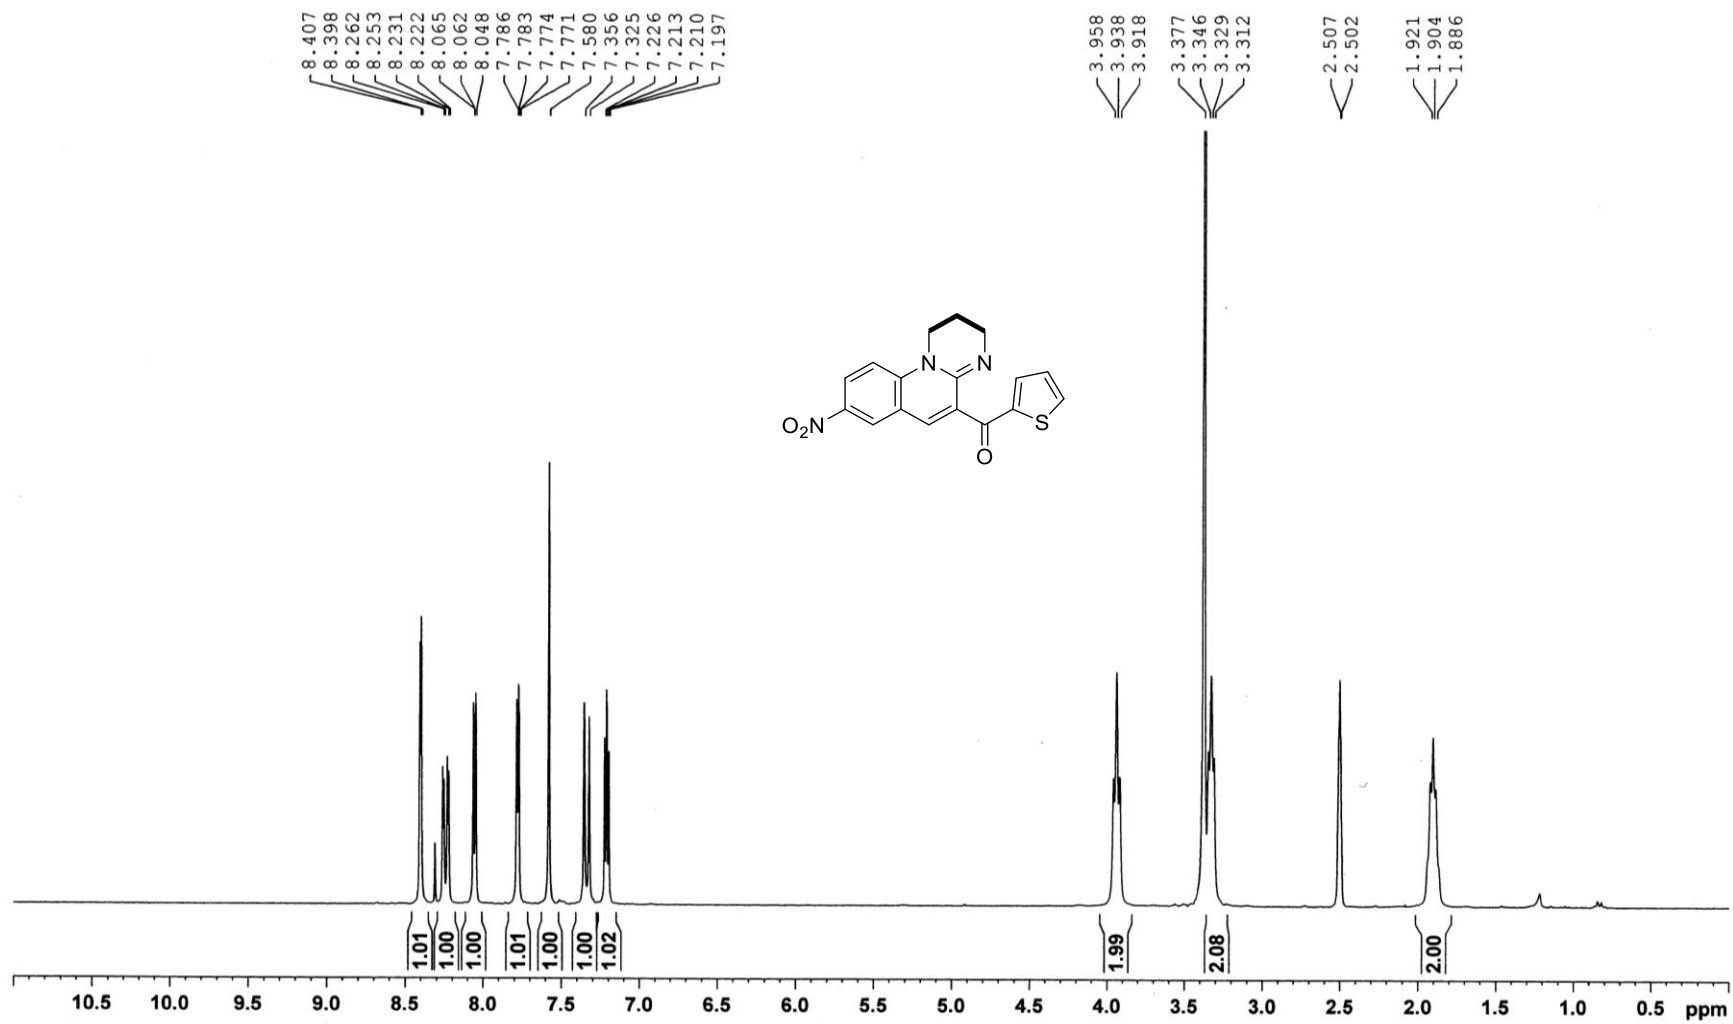

Figure S28. <sup>1</sup>H NMR (300 MHz, DMSO-*d*<sub>6</sub>) spectra of compound 3an

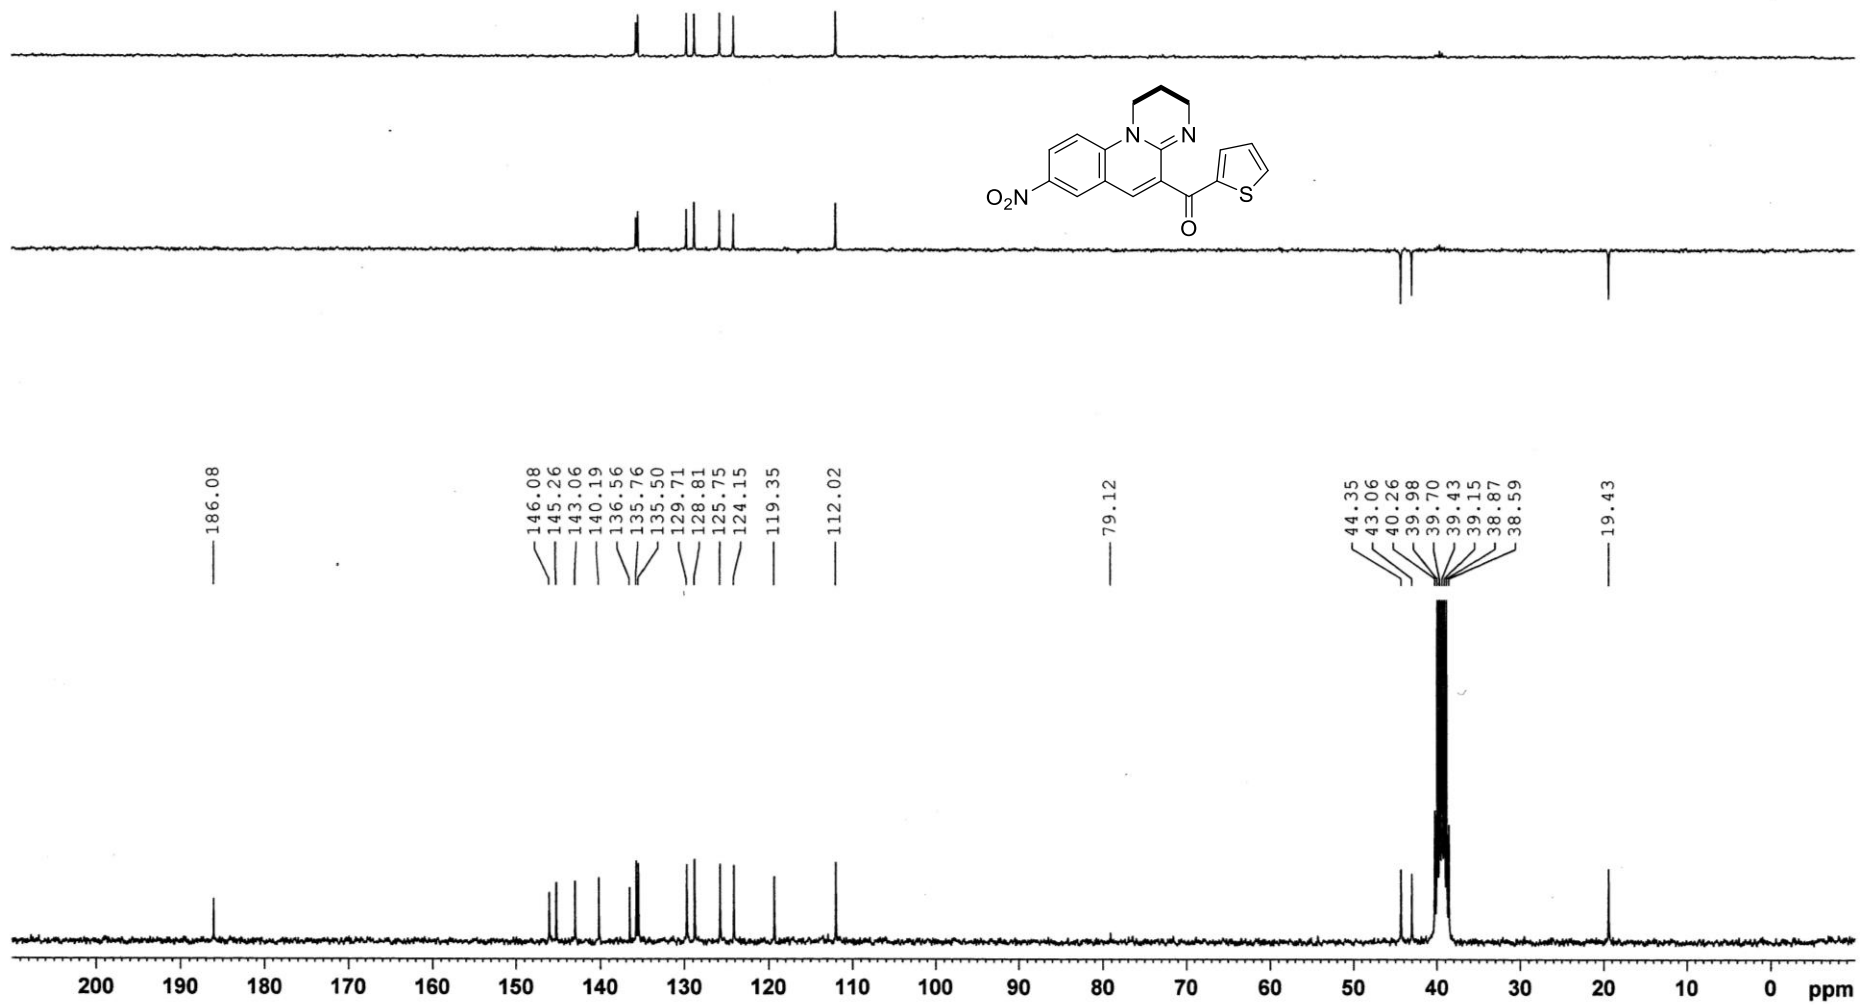

Figure S29. <sup>13</sup>C NMR (75 MHz, DMSO-*d*<sub>6</sub>) spectra of compound 3an

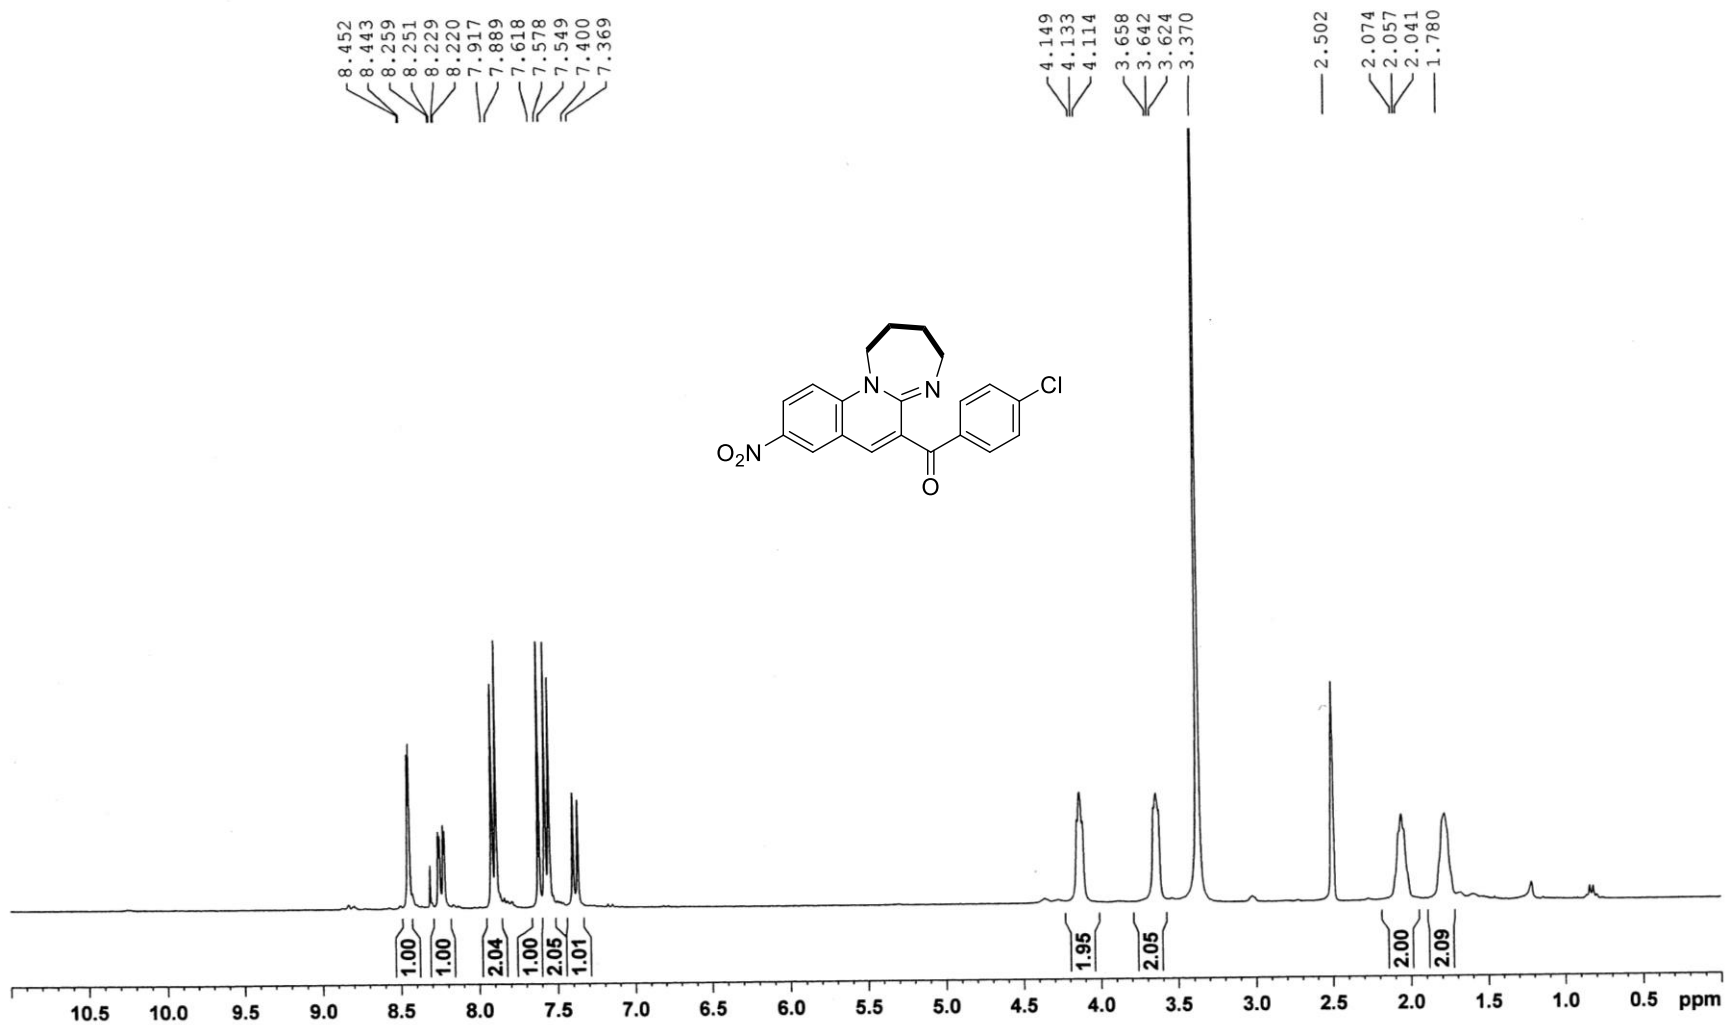

Figure S30.  $^1\text{H}$  NMR (300 MHz,  $\text{DMSO-}d_6$ ) spectra of compound 3ao

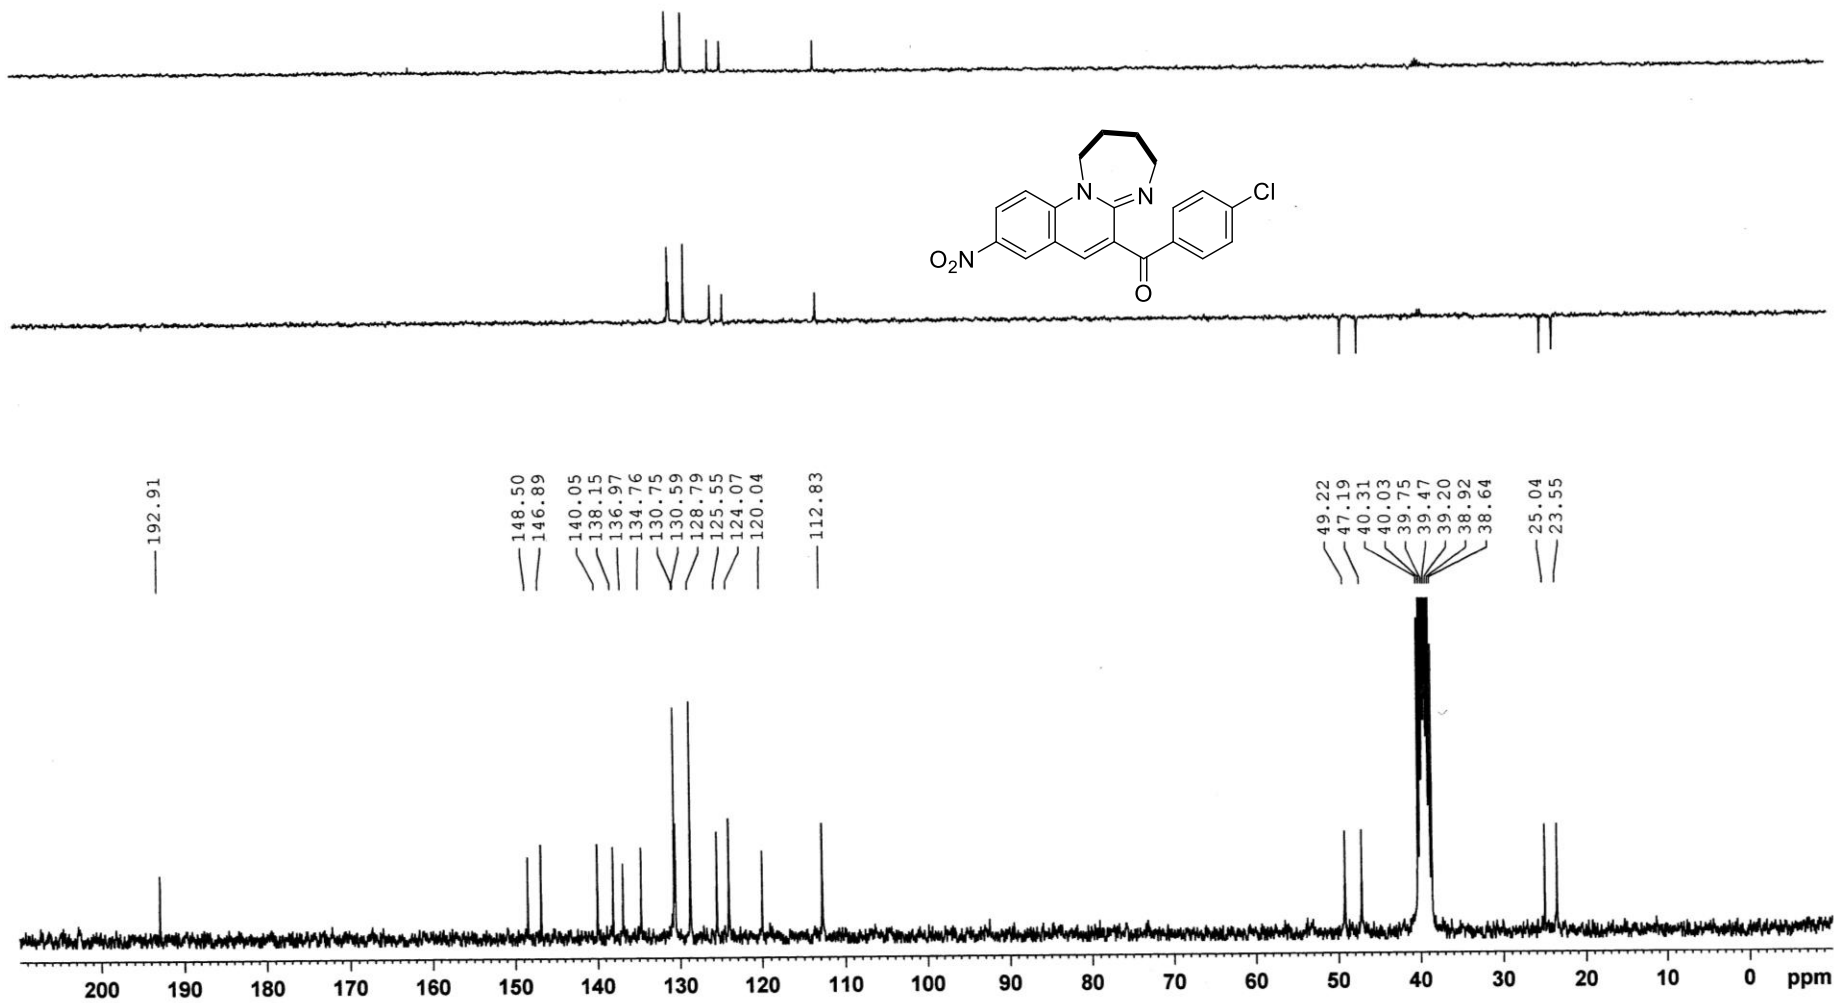

Figure S31.  $^{13}\text{C}$  NMR (75 MHz,  $\text{DMSO-}d_6$ ) spectra of compound 3ao

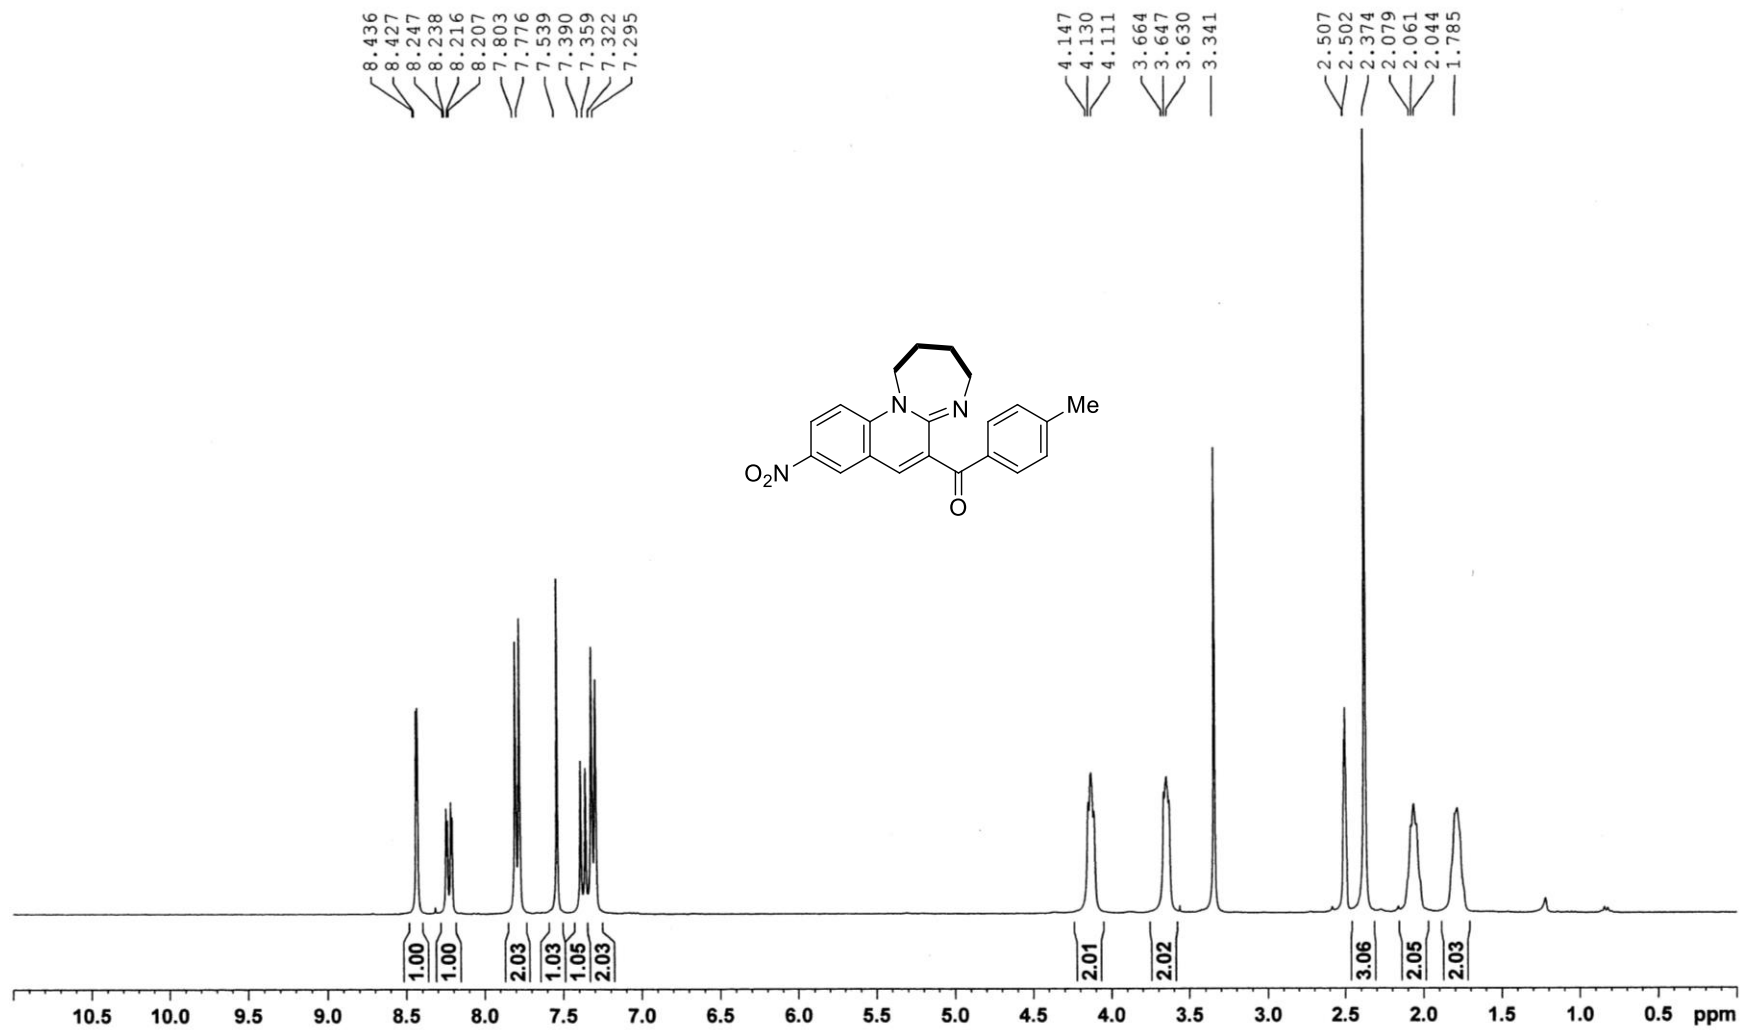

Figure S32. <sup>1</sup>H NMR (300 MHz, DMSO-*d*<sub>6</sub>) spectra of compound 3ap

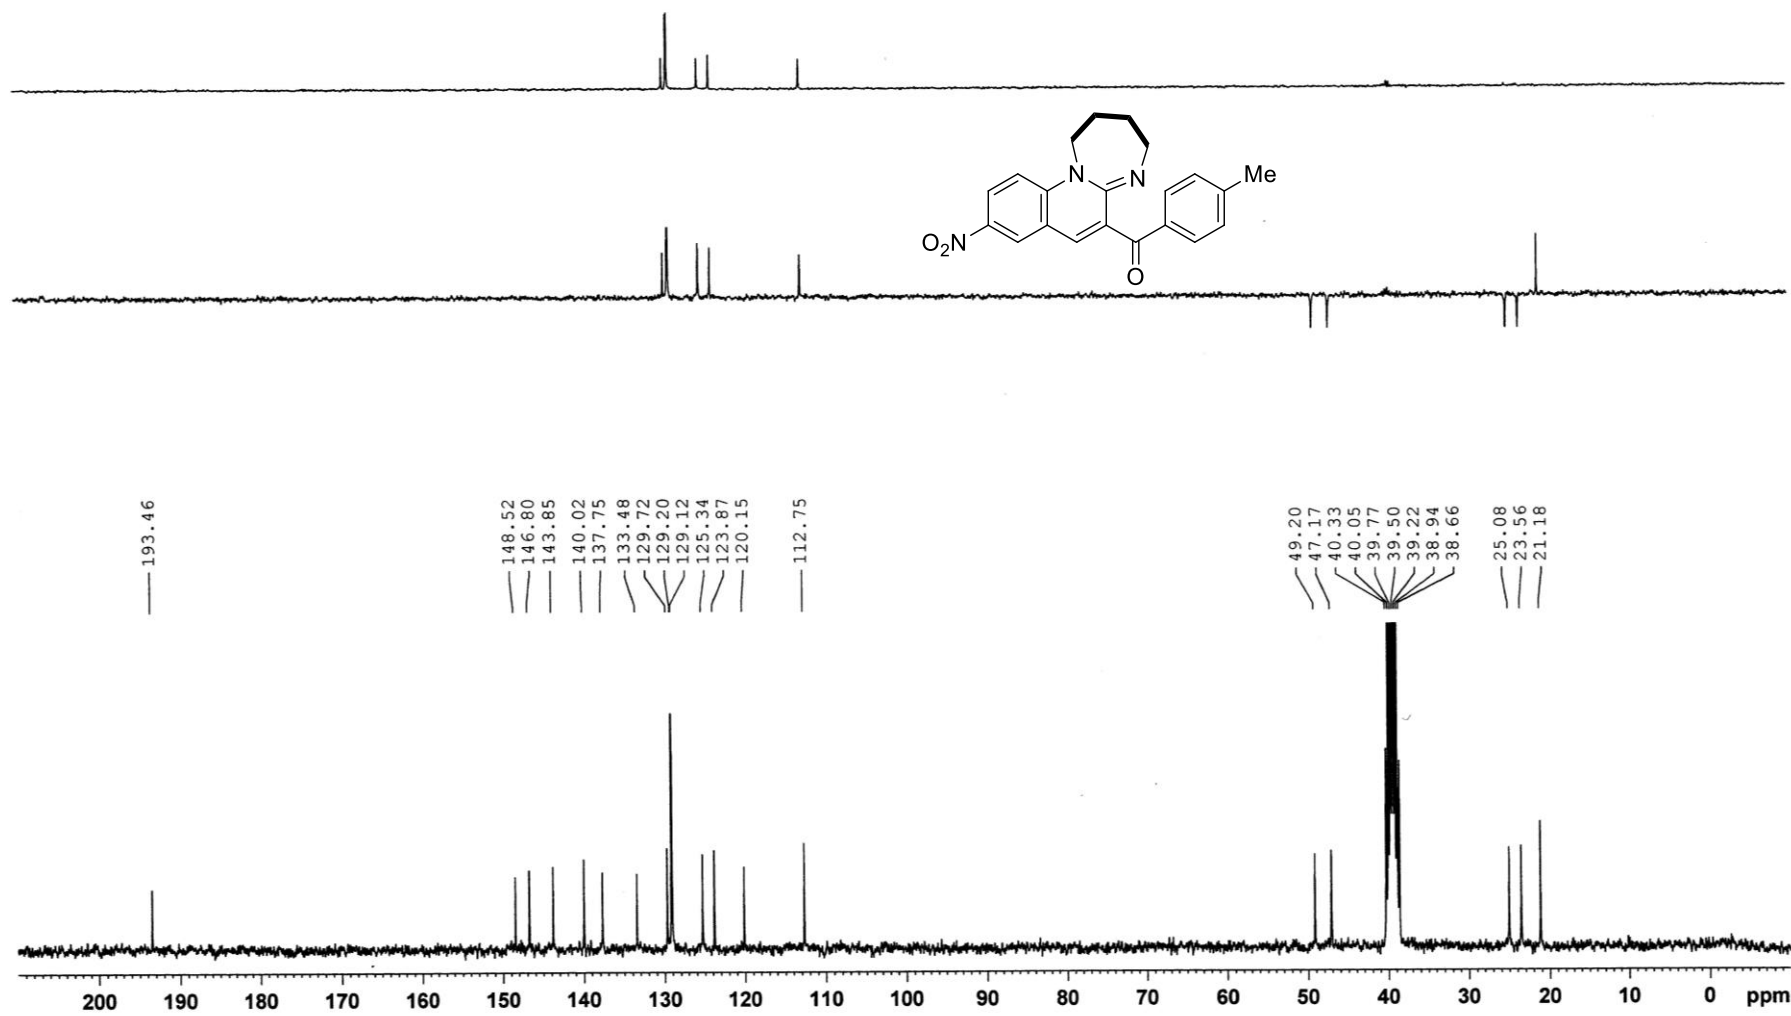

Figure S33. <sup>13</sup>C NMR (75 MHz, DMSO-*d*<sub>6</sub>) spectra of compound 3ap



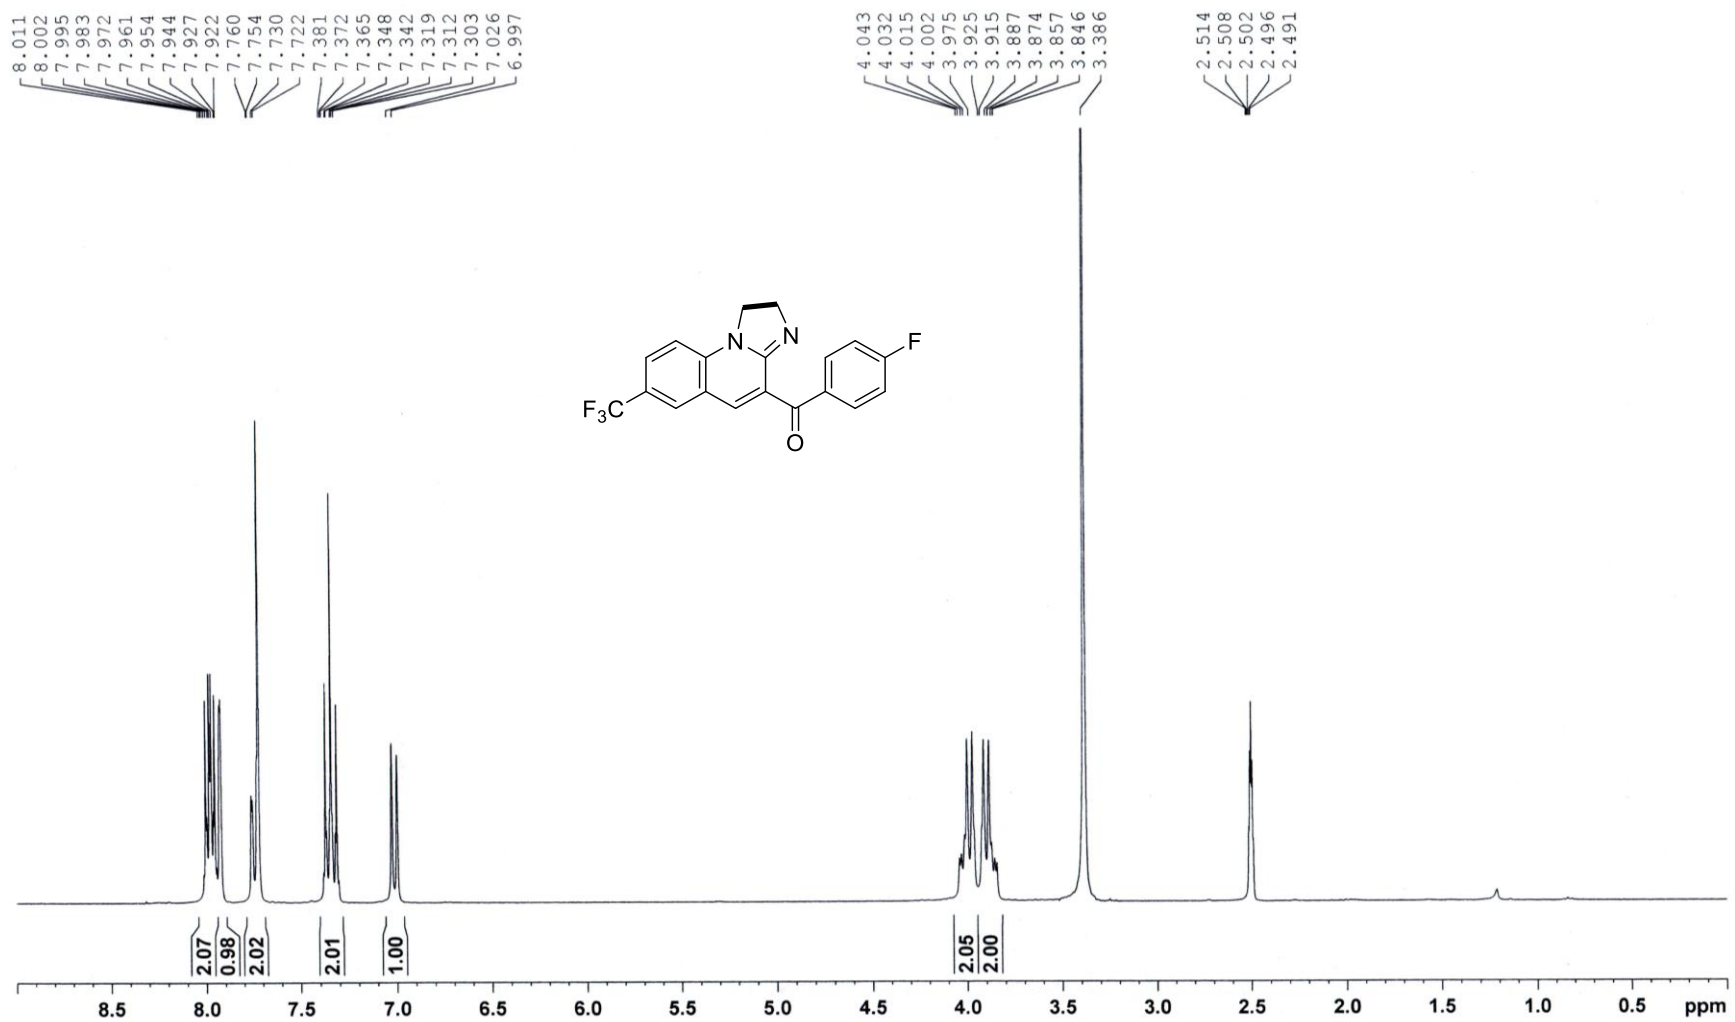

Figure S34. <sup>1</sup>H NMR (300 MHz, DMSO-*d*<sub>6</sub>) spectra of compound **3ba**

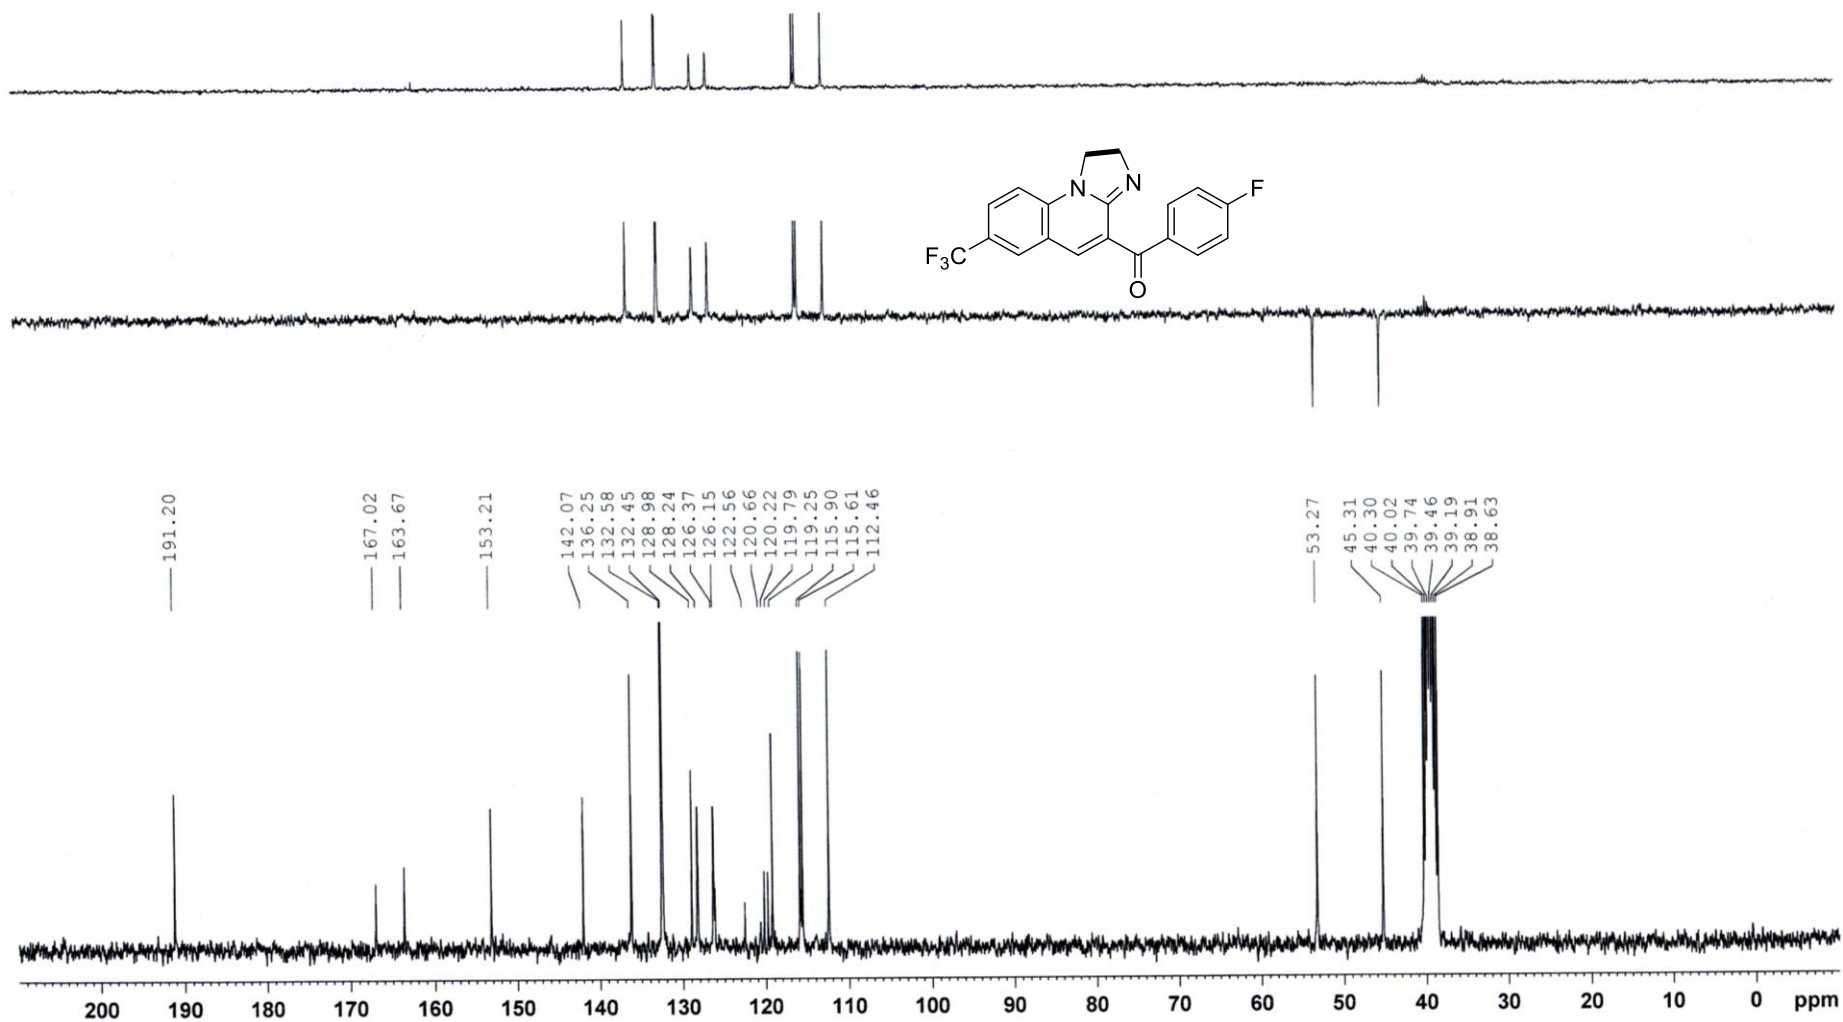

Figure S35.  $^{13}\text{C}$  NMR (75 MHz,  $\text{DMSO-}d_6$ ) spectra of compound **3ba**

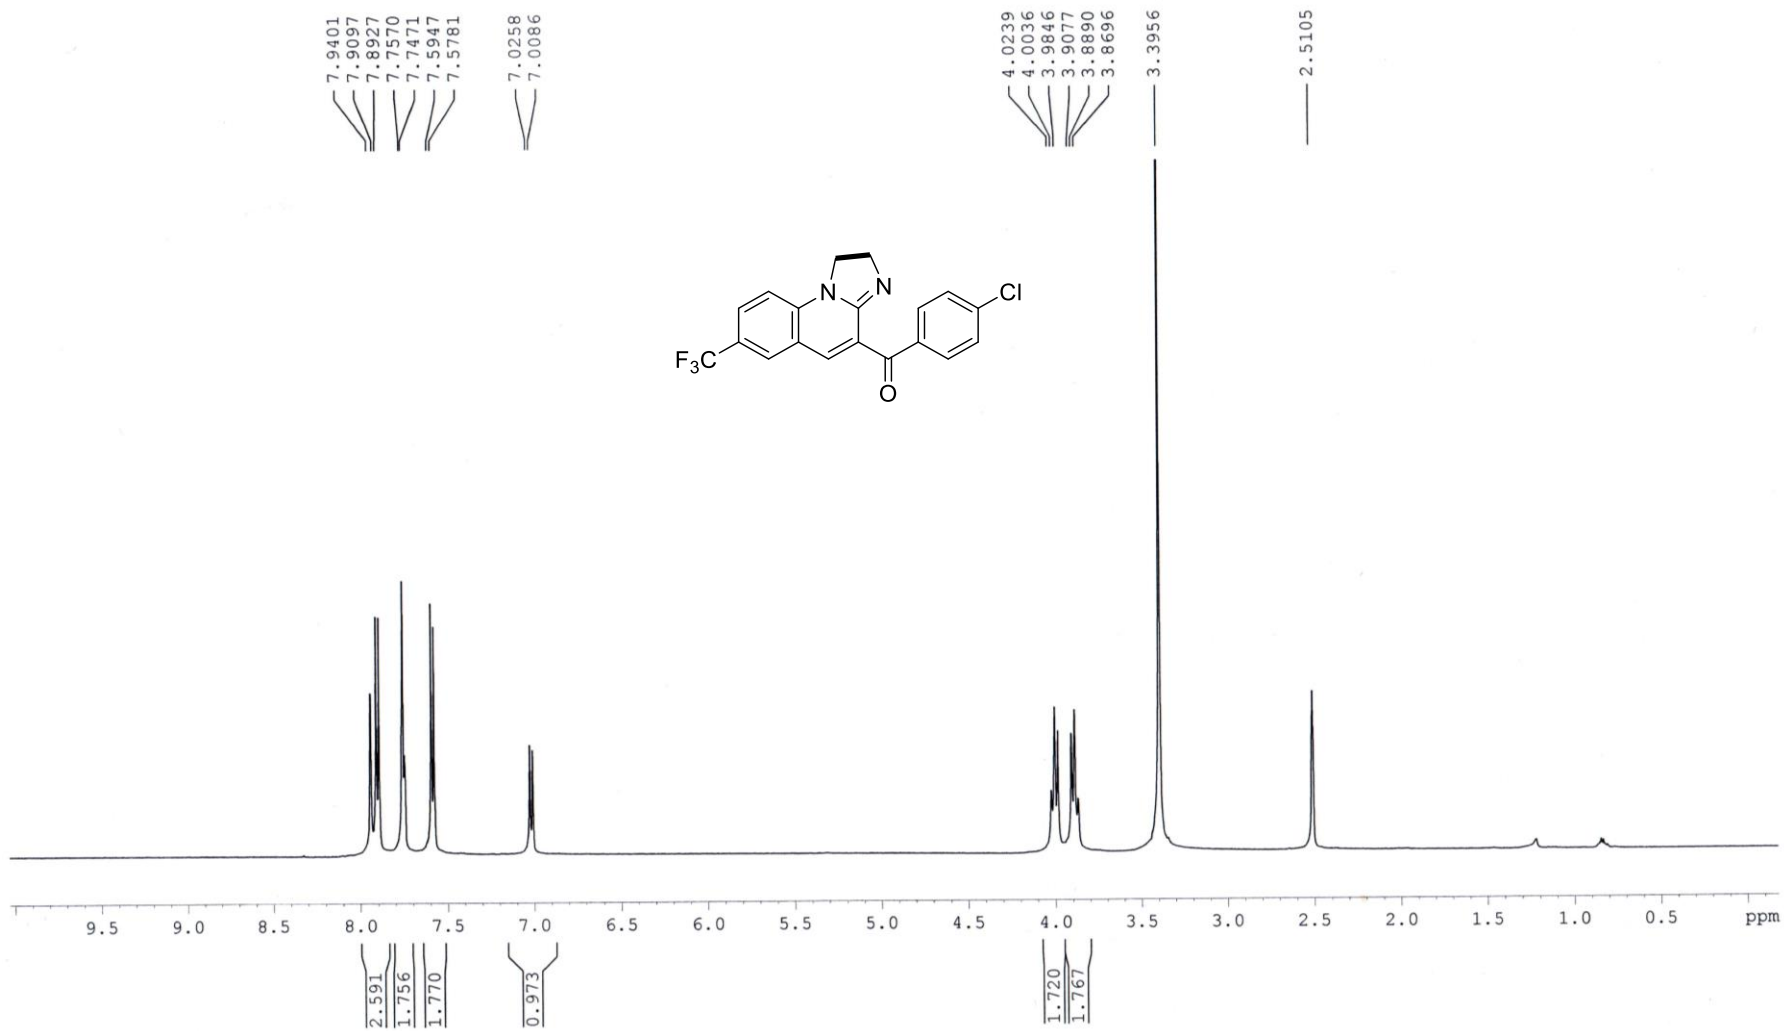

**Figure S36.** <sup>1</sup>H NMR (500 MHz, DMSO-*d*<sub>6</sub>) spectra of compound **3bb**

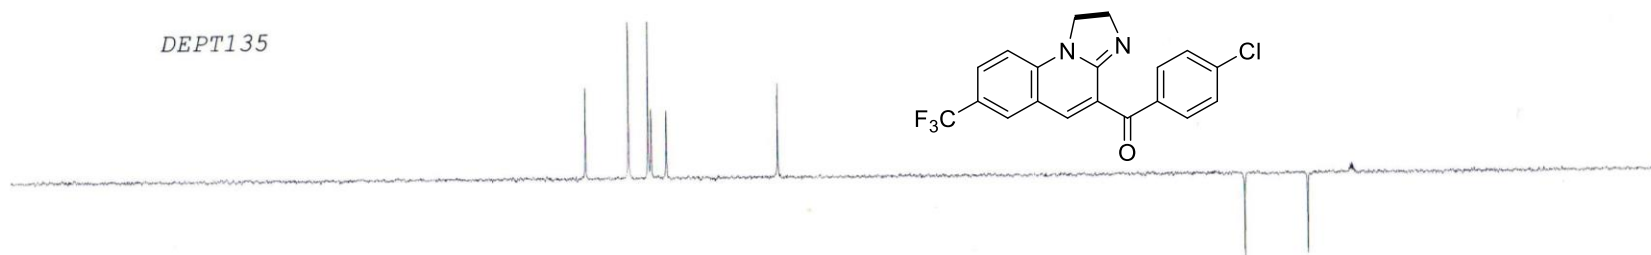

YUNNAN UNIVERSITY AV. DRX 500  
 chenliang CL-007 in DMSO  
 16030401

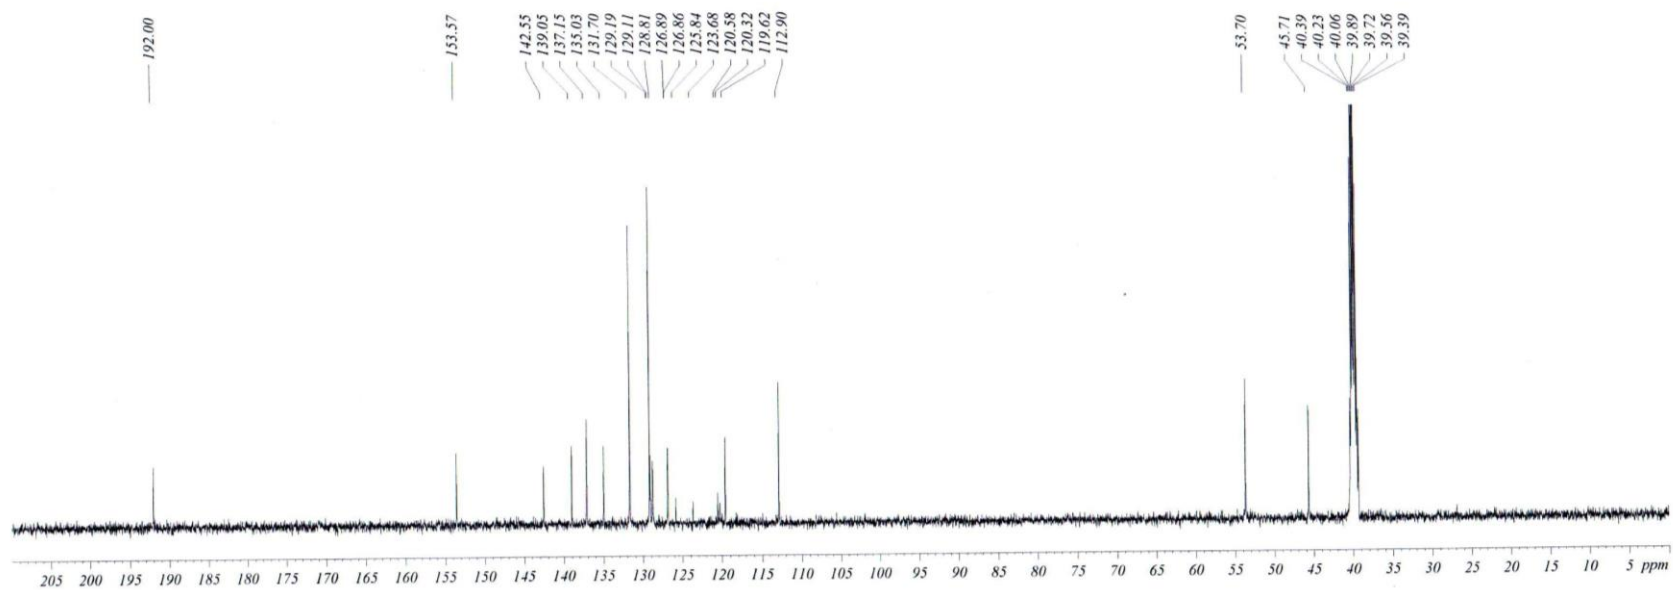

Figure S37.  $^{13}\text{C}$  NMR (125 MHz,  $\text{DMSO-}d_6$ ) spectra of compound 3bb

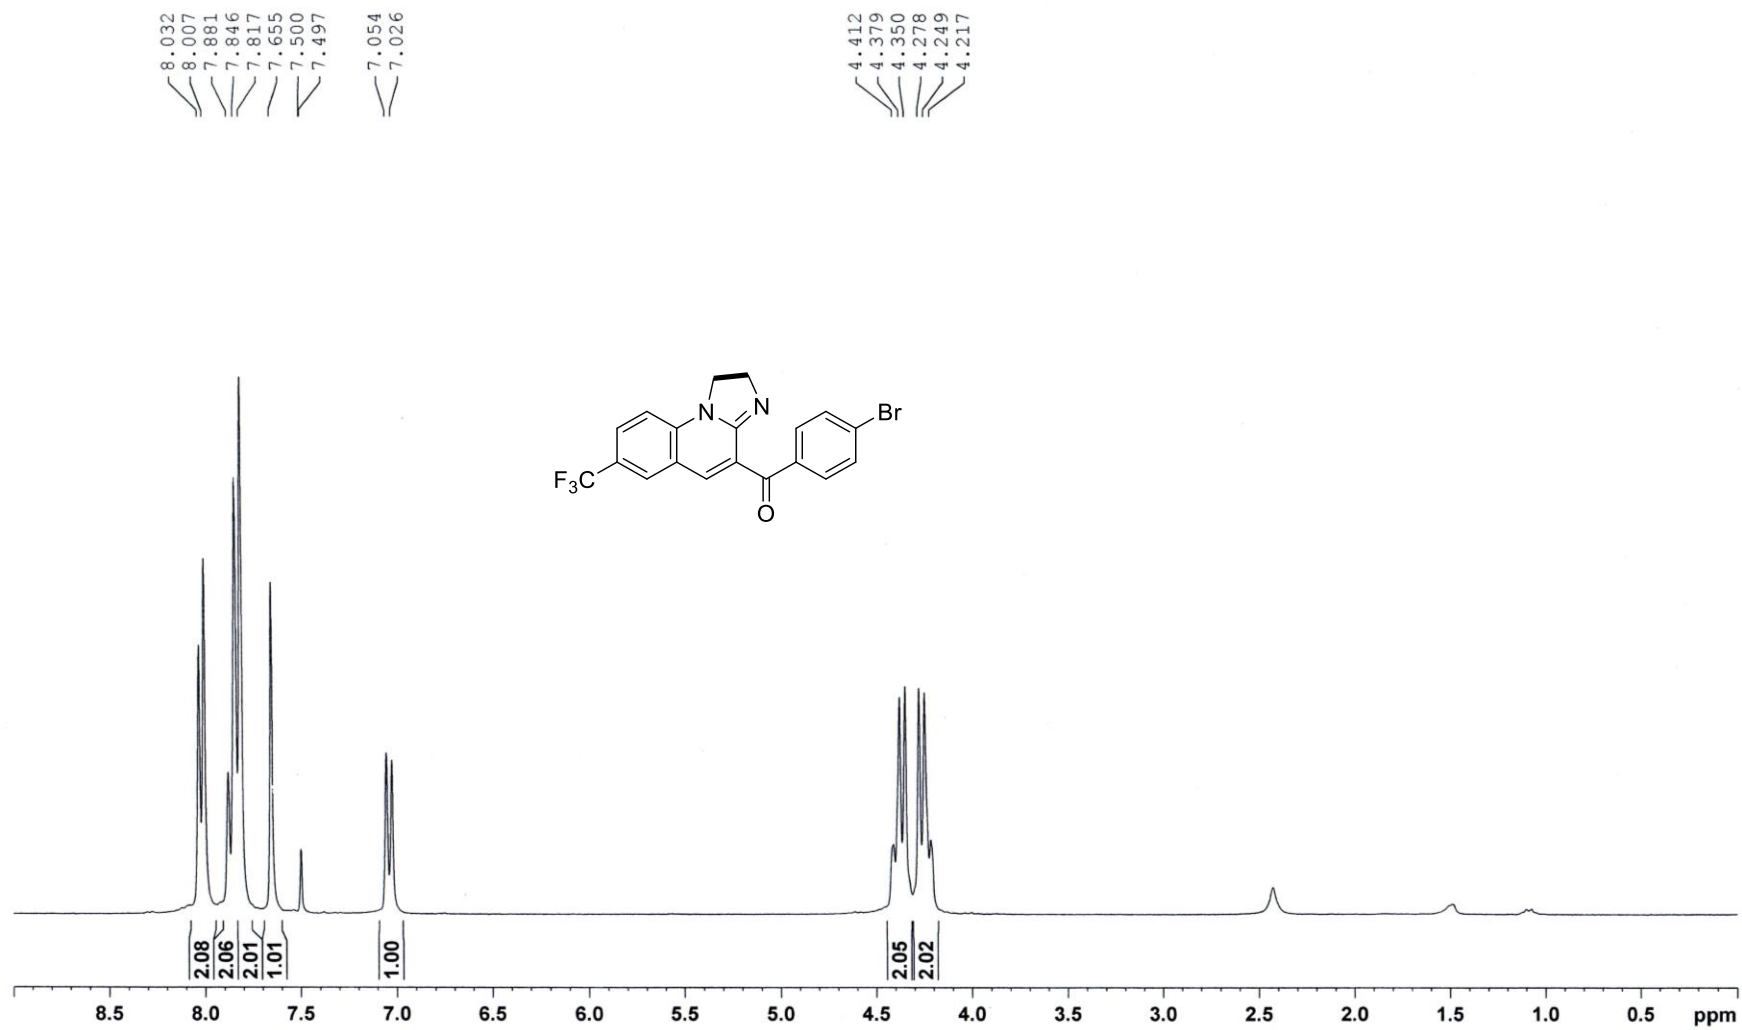

Figure S38. <sup>1</sup>H NMR (400 MHz, DCCl<sub>3</sub>) spectra of compound **3bc**

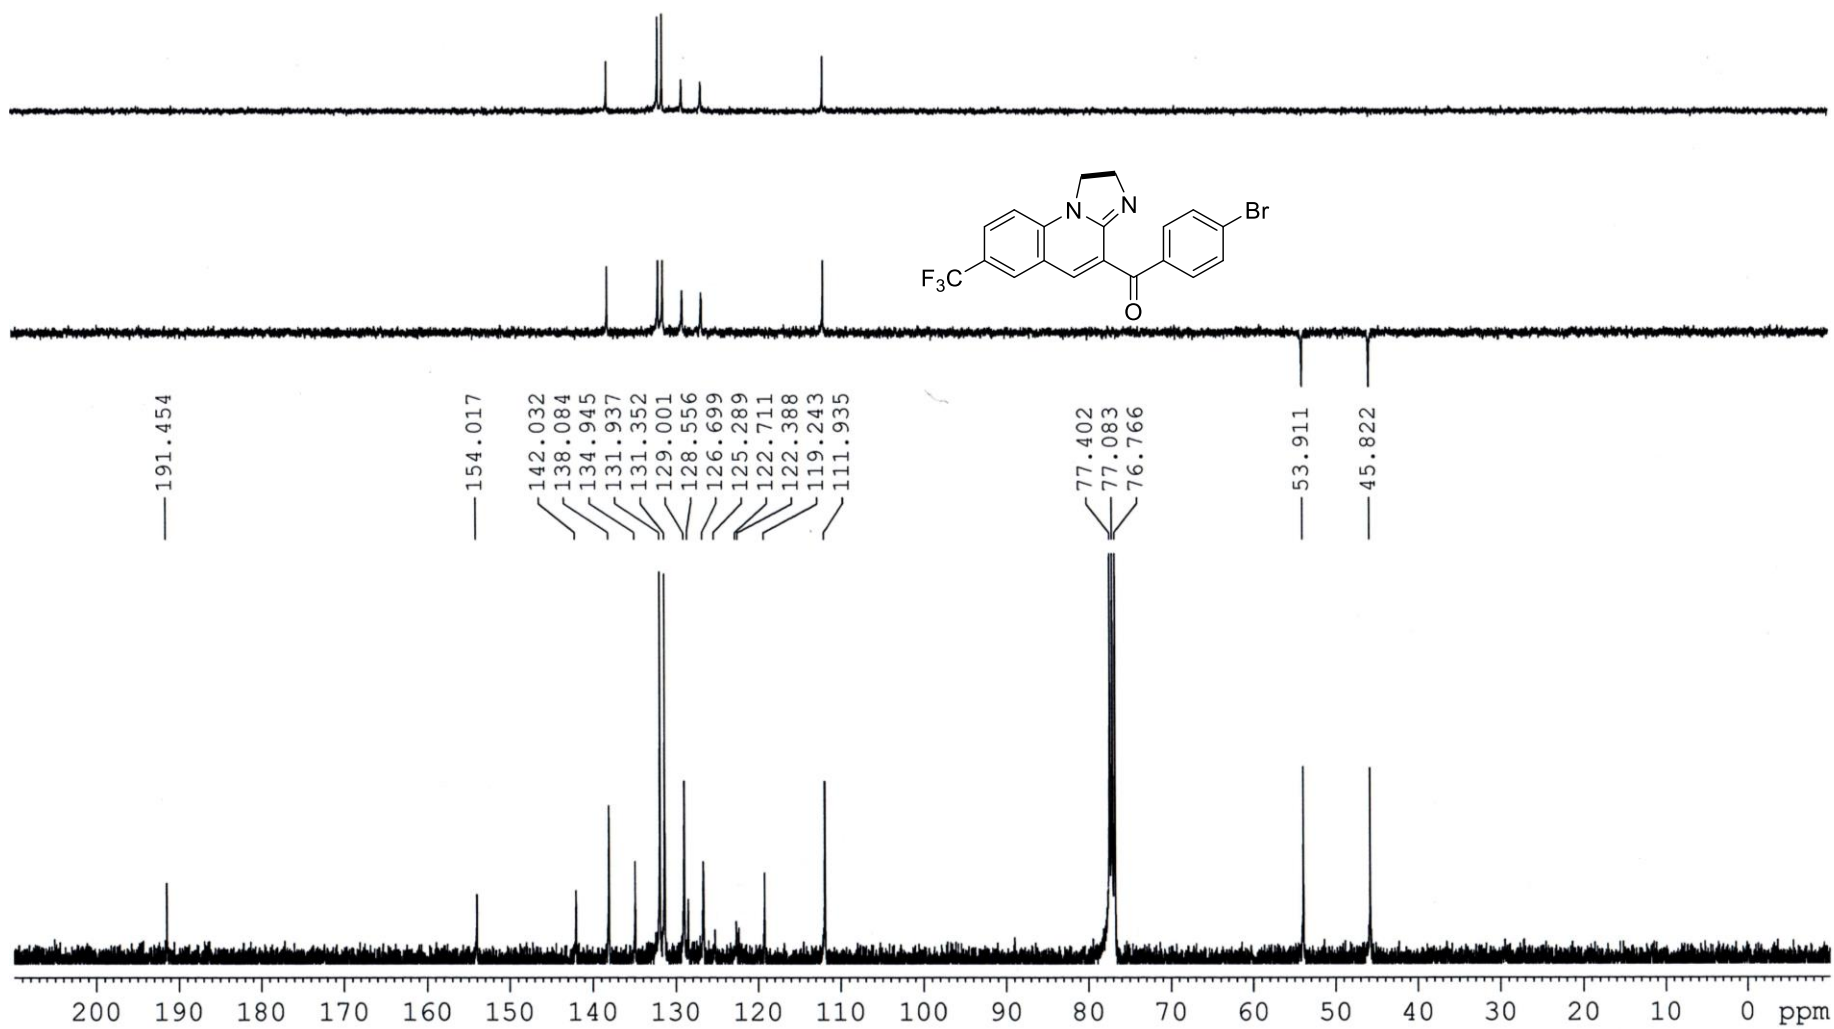

Figure S39.  $^{13}\text{C}$  NMR (100 MHz, DCCl<sub>3</sub>) spectra of compound **3bc**

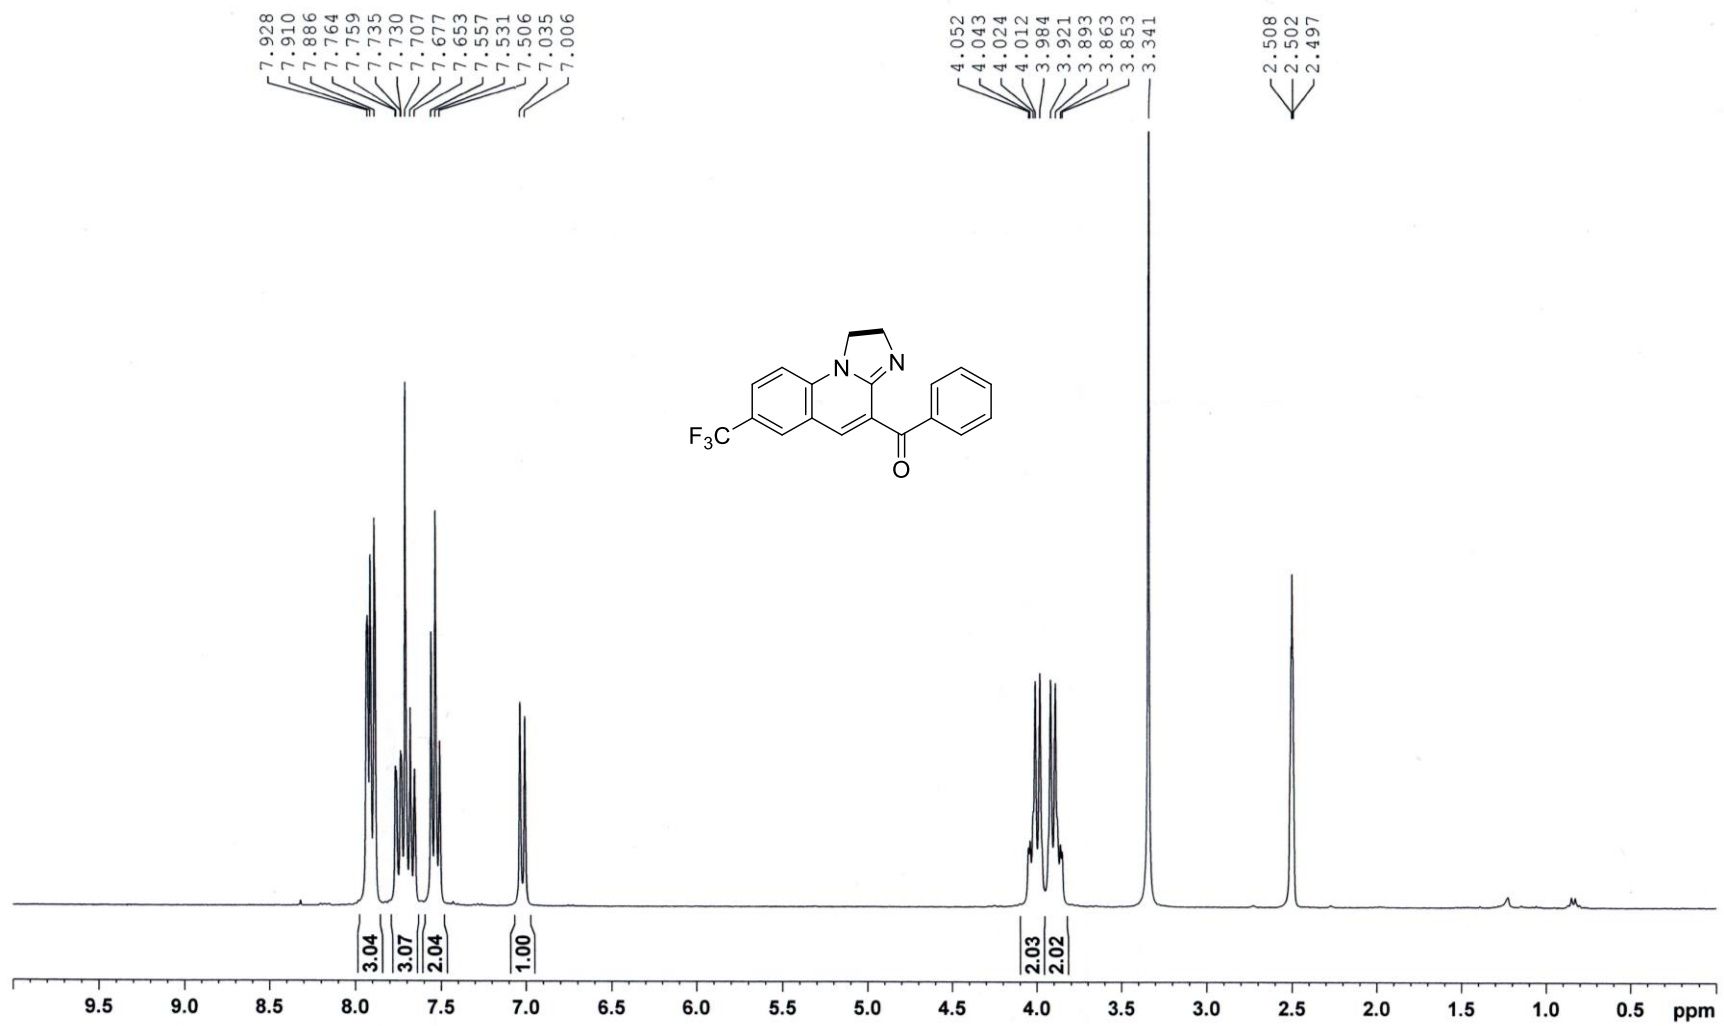

Figure S40. <sup>1</sup>H NMR (300 MHz, DMSO-*d*<sub>6</sub>) spectra of compound **3bd**

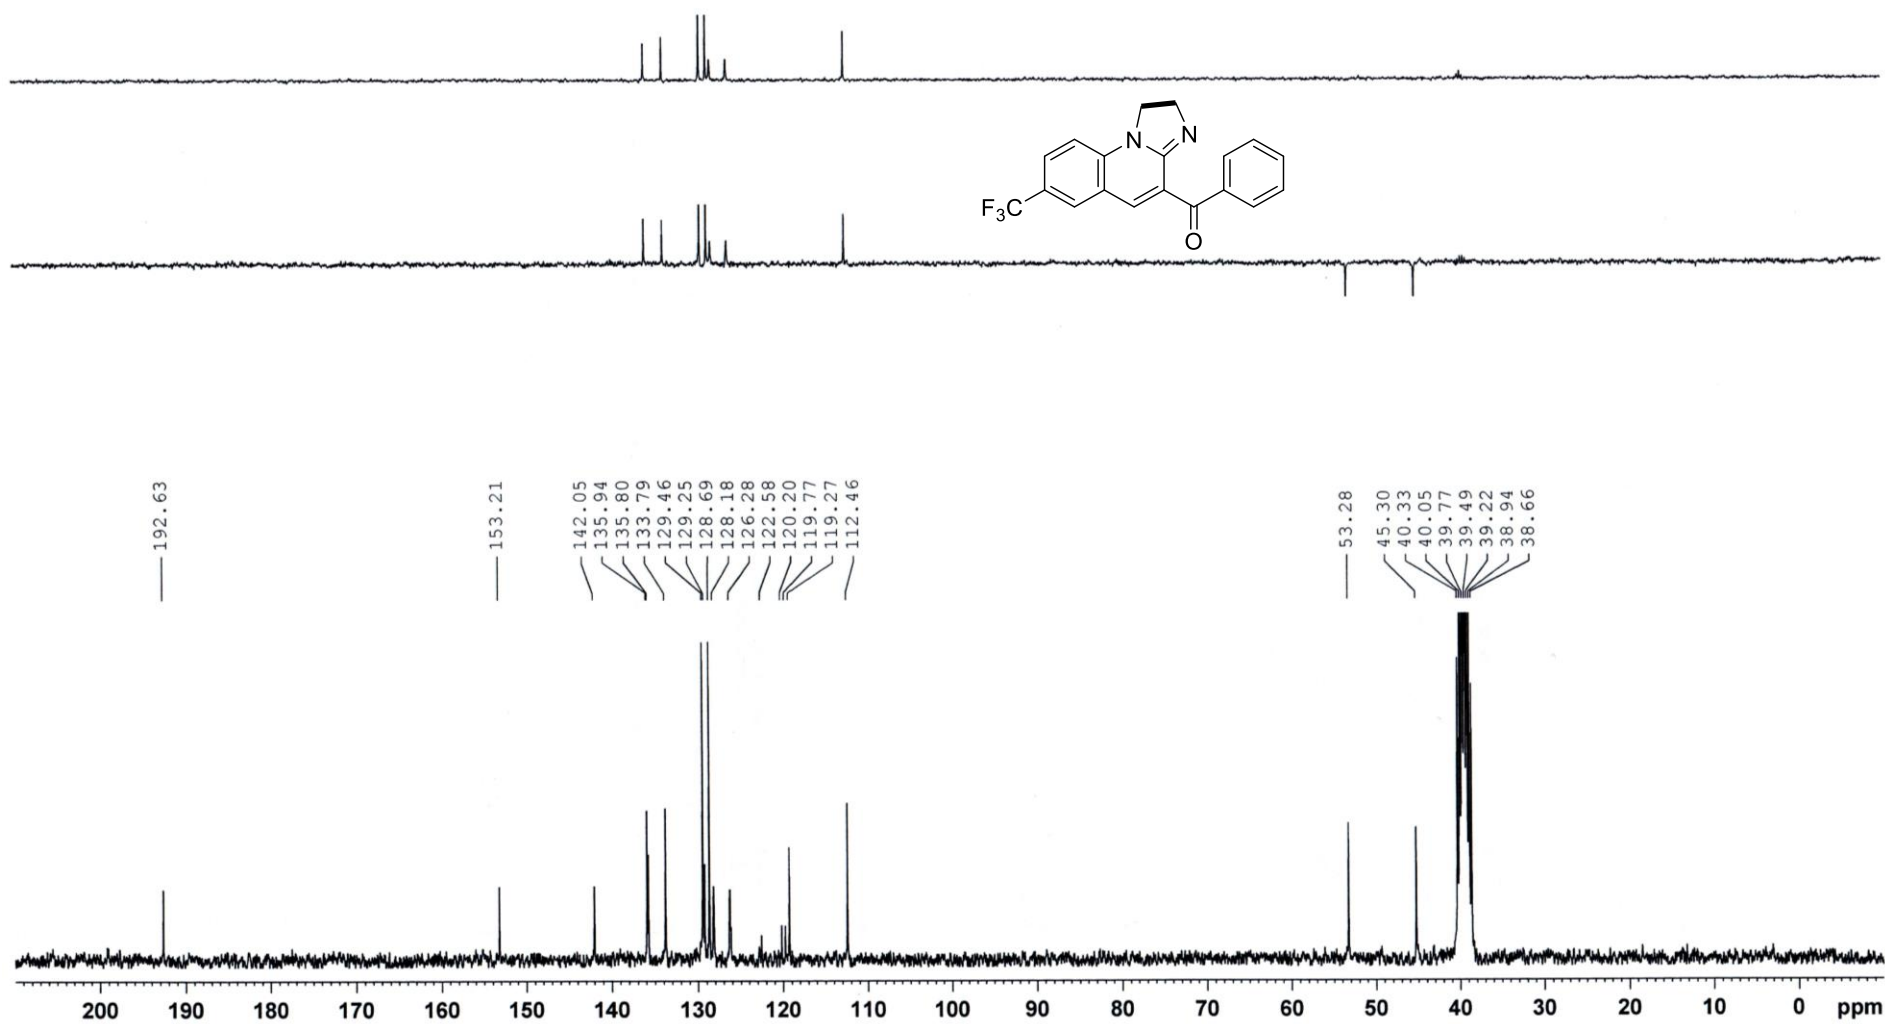

Figure S41.  $^{13}\text{C}$  NMR (75 MHz,  $\text{DMSO-}d_6$ ) spectra of compound **3bd**



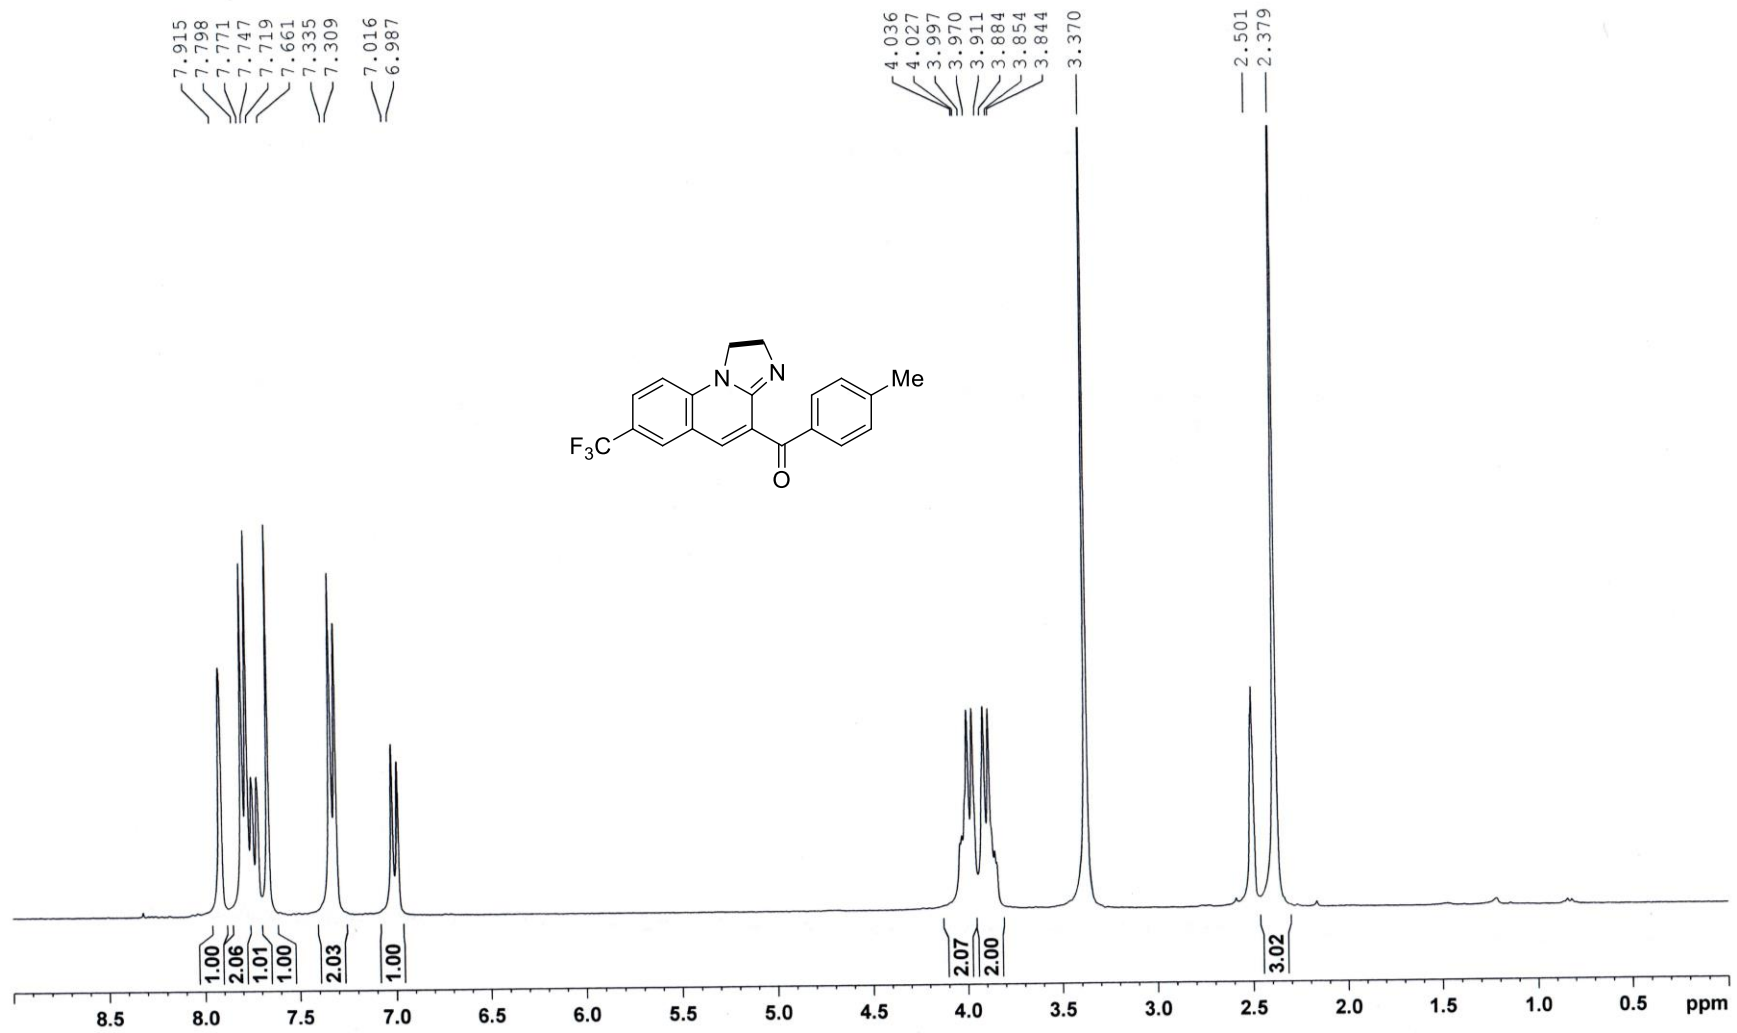

Figure S42. <sup>1</sup>H NMR (300 MHz, DMSO-*d*<sub>6</sub>) spectra of compound 3be

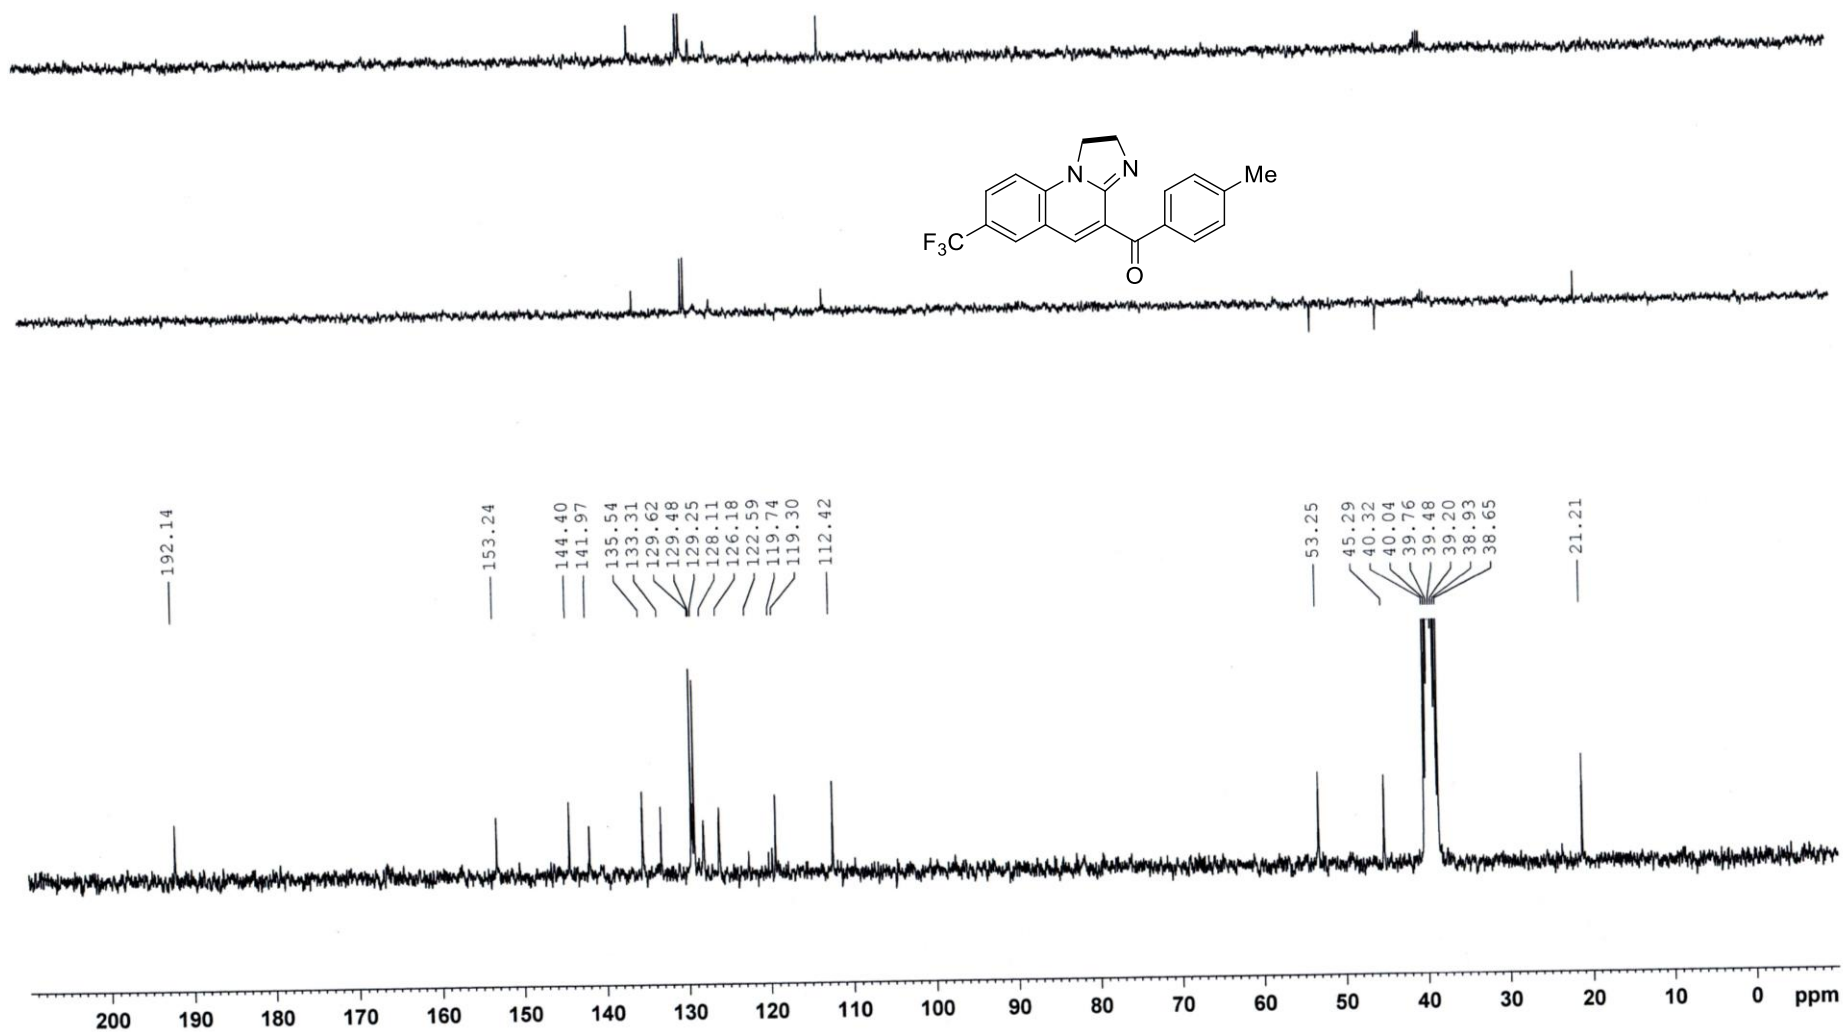

Figure S43.  $^{13}\text{C}$  NMR (75 MHz,  $\text{DMSO-}d_6$ ) spectra of compound **3be**

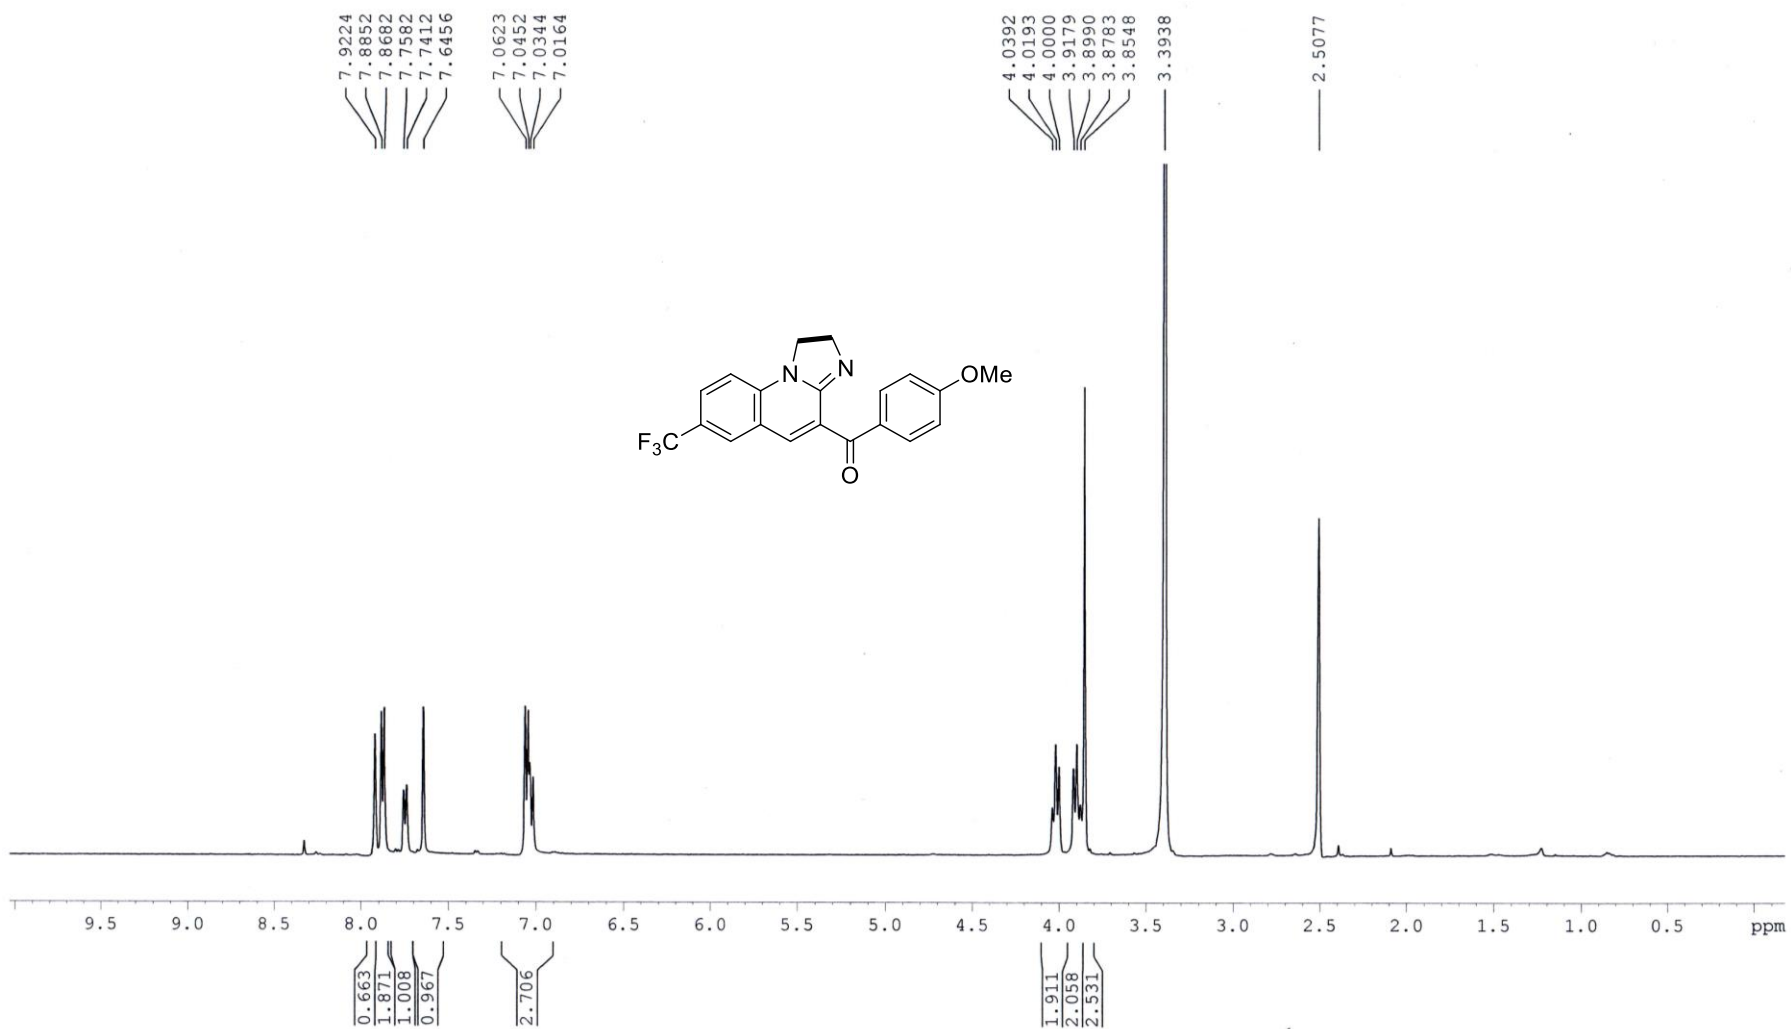

**Figure S44.** <sup>1</sup>H NMR (500 MHz, DMSO-*d*<sub>6</sub>) spectra of compound **3bf**

DEPT135

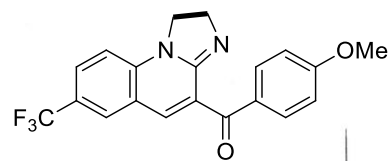

YUNNAN UNIVERSITY AV. DRX 50C  
chenliang CL-008 in DMSO  
16030402

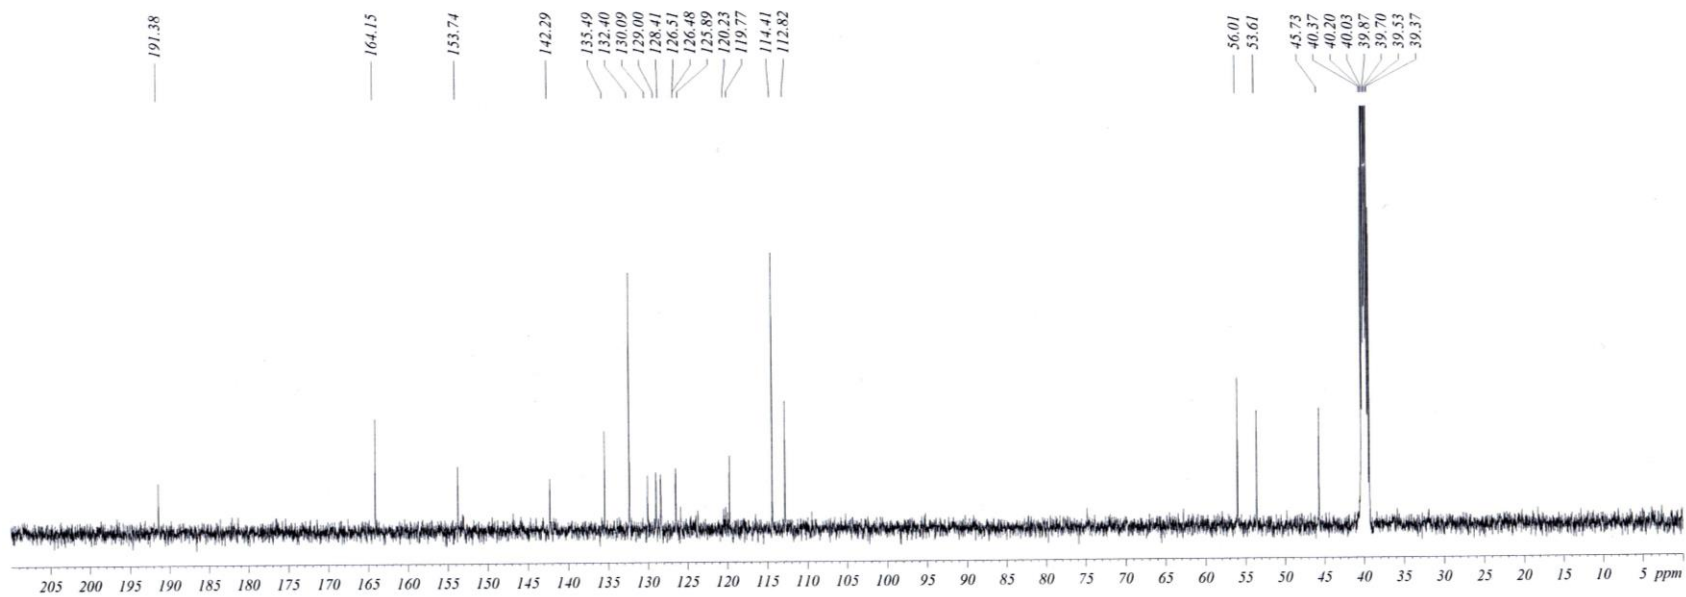

Figure S45.  $^{13}\text{C}$  NMR (125 MHz,  $\text{DMSO-}d_6$ ) spectra of compound **3bf**

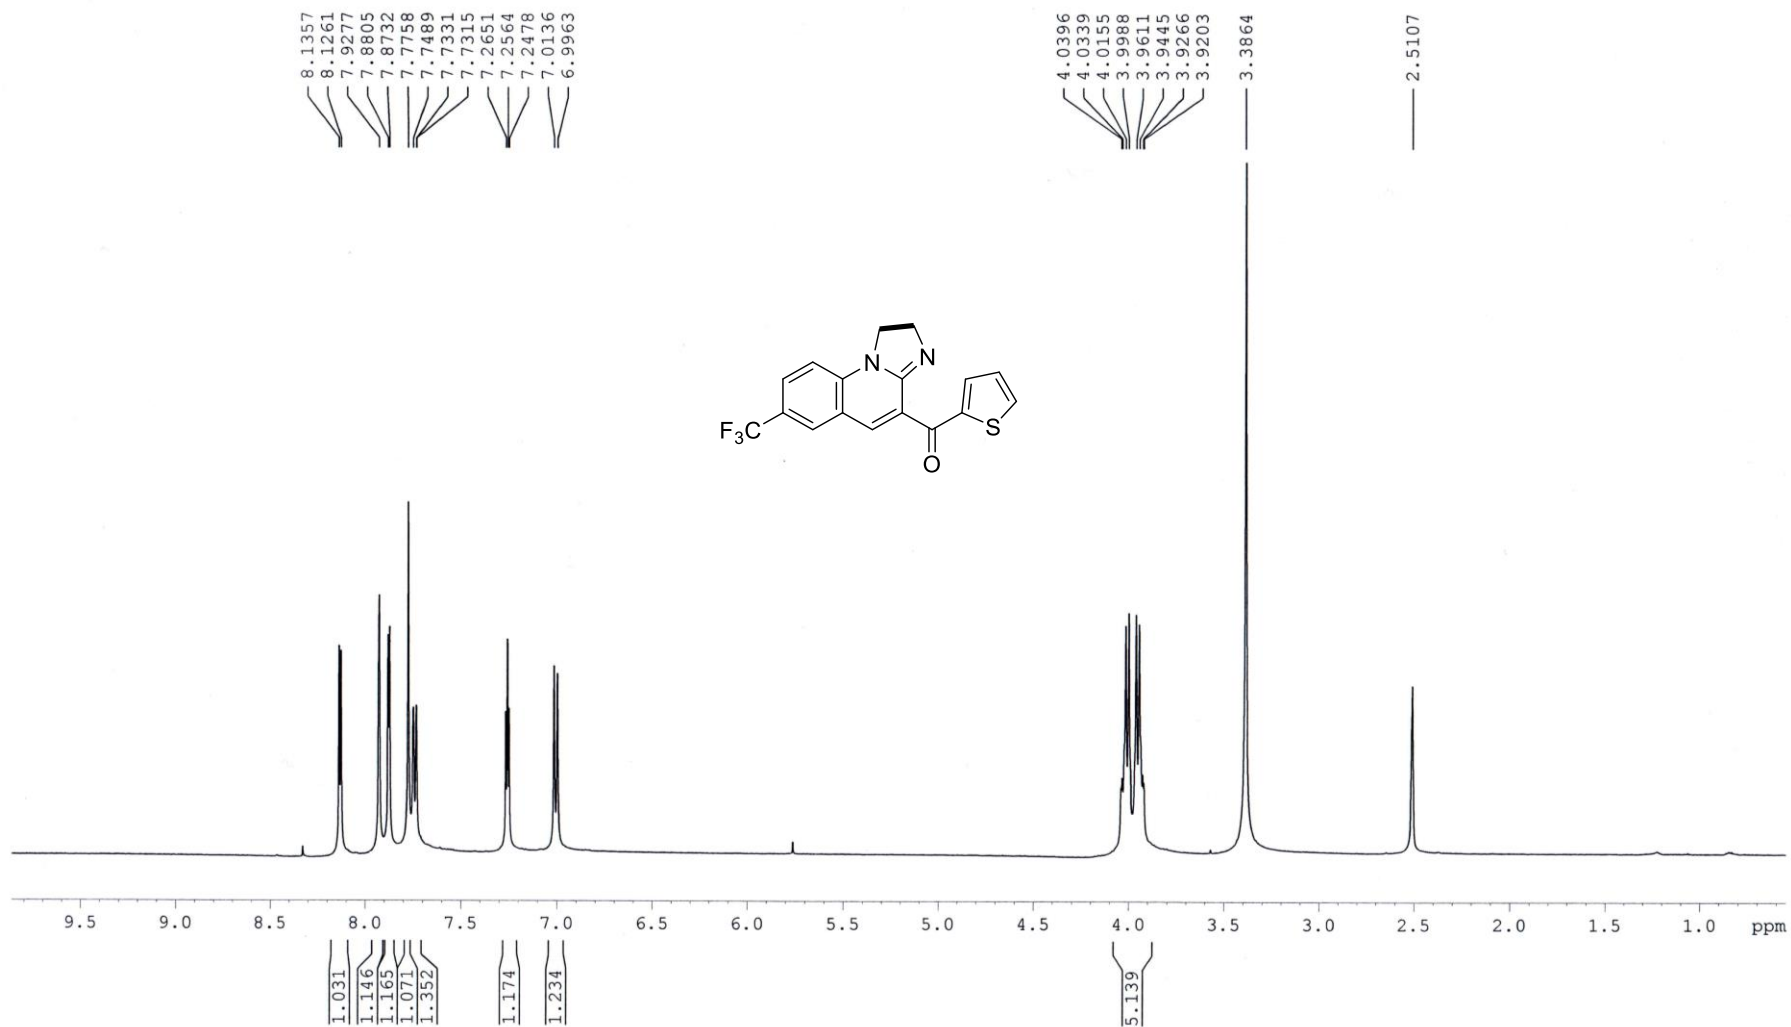

**Figure S46.** <sup>1</sup>H NMR (500 MHz, DMSO-*d*<sub>6</sub>) spectra of compound **3bg**

DEPT135

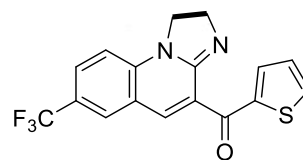

YUNNAN UNIVERSITY AV. DRX 506  
chenliang CL-018 in DMSO  
16032303

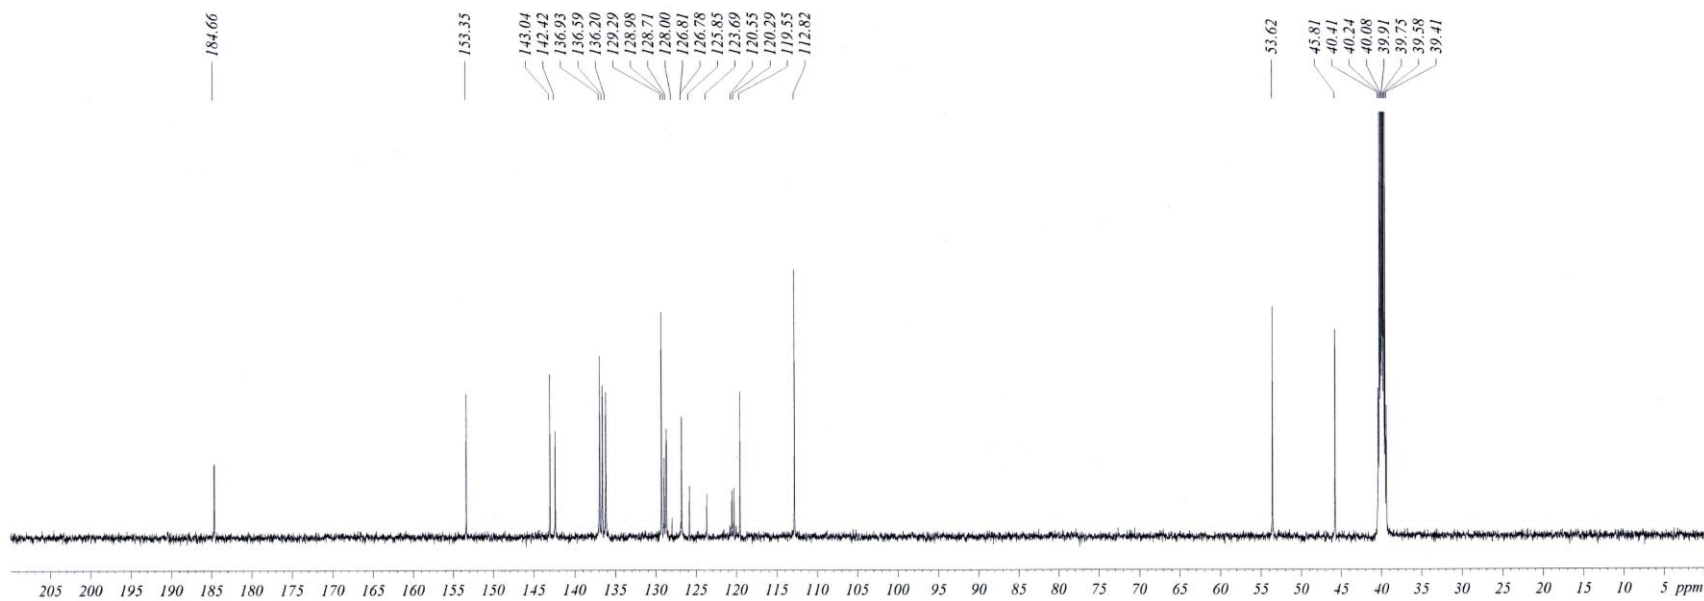

Figure S47.  $^{13}\text{C}$  NMR (125 MHz, DMSO- $d_6$ ) spectra of compound **3bg**

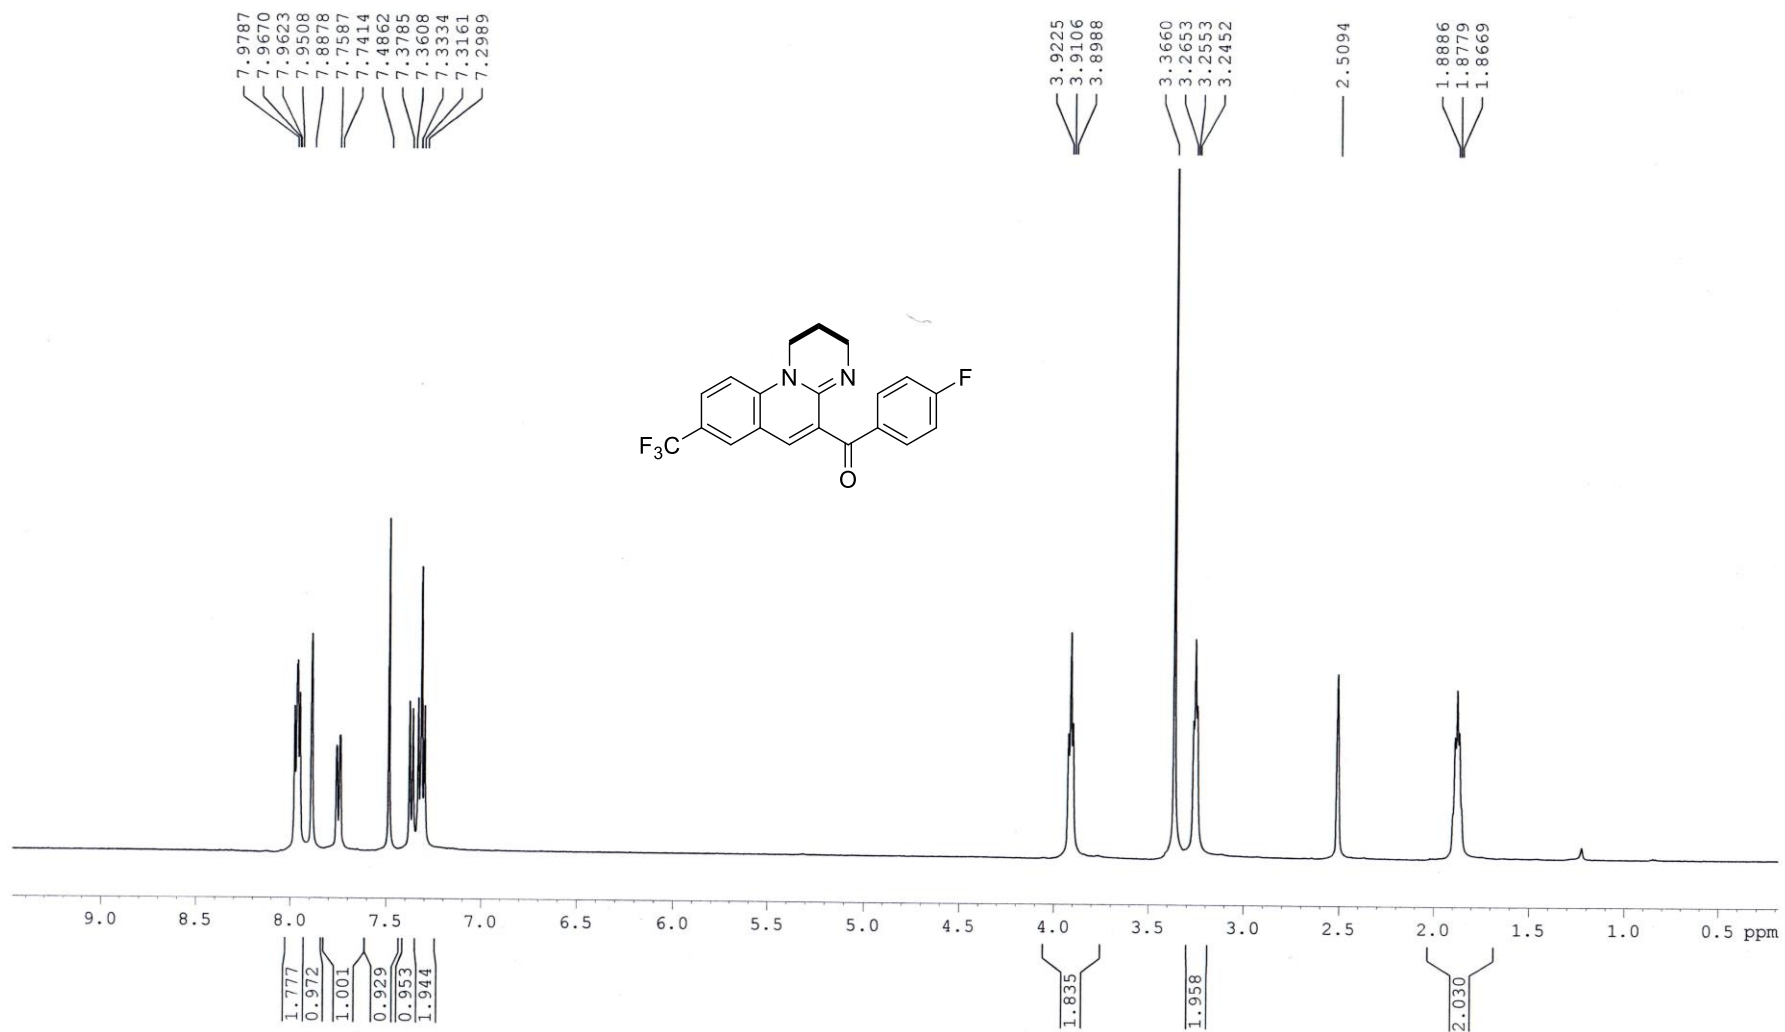

**Figure S48.** <sup>1</sup>H NMR (500 MHz, DMSO-*d*<sub>6</sub>) spectra of compound **3bh**

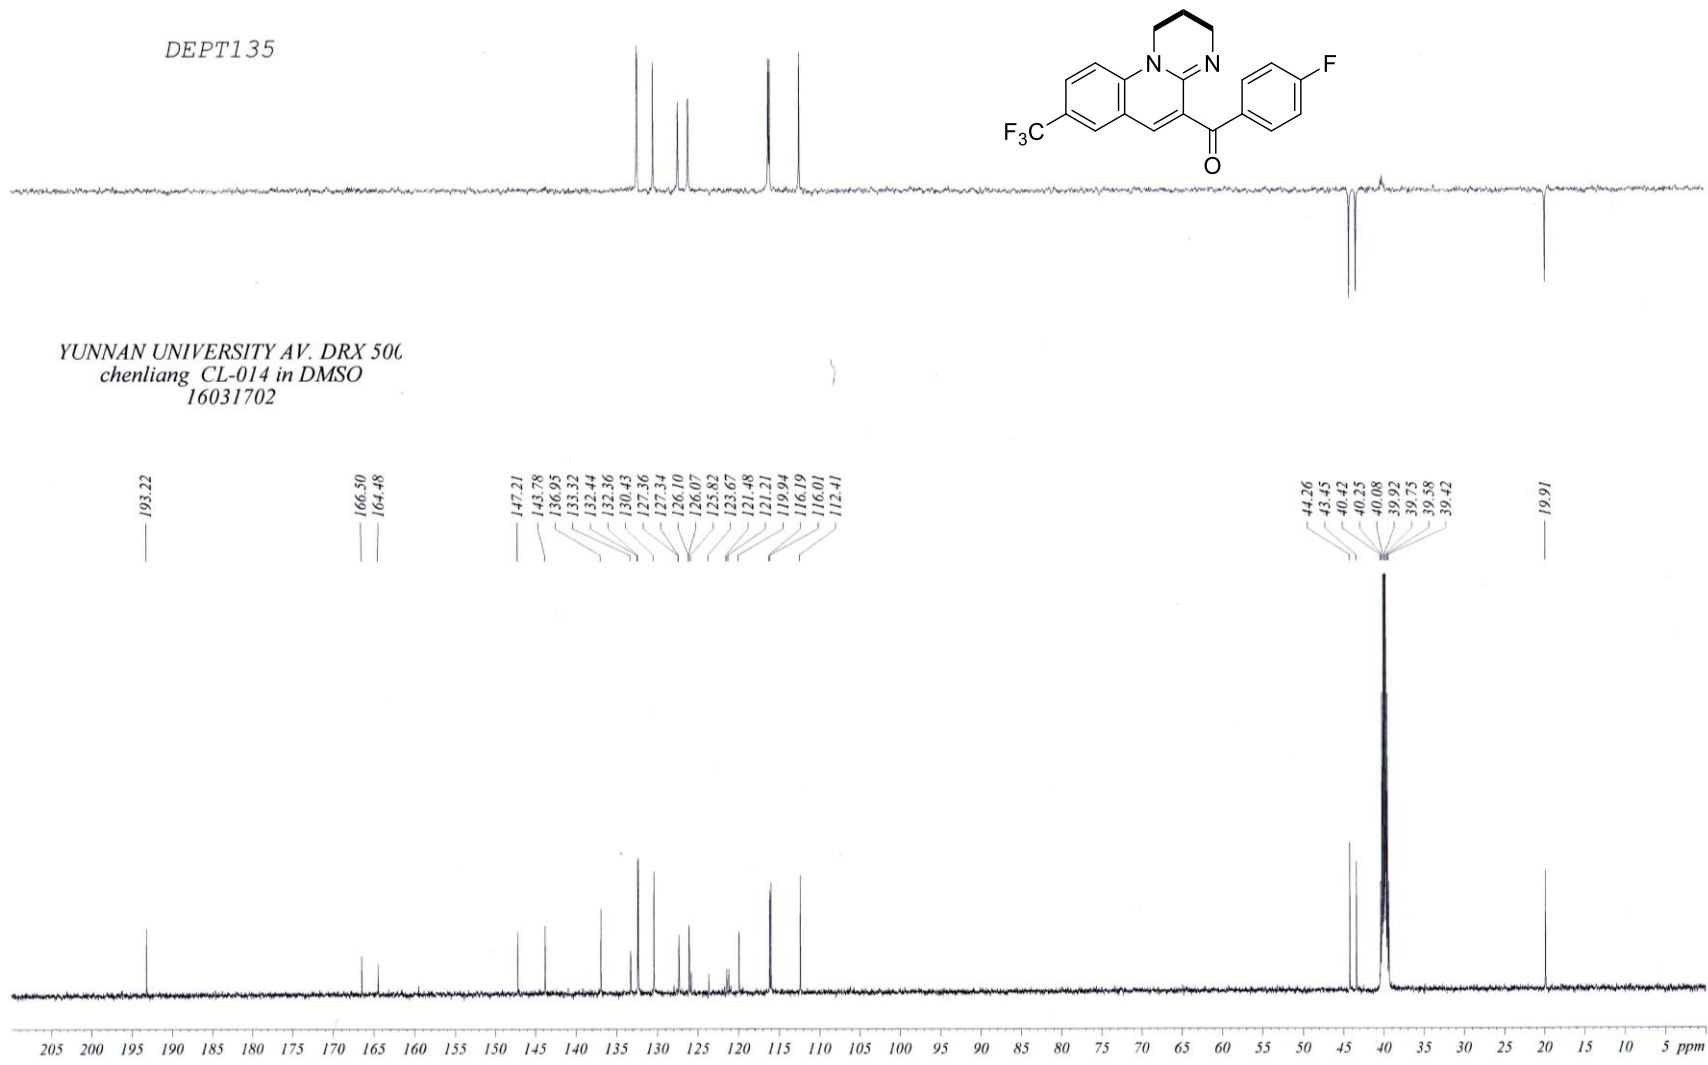

Figure S49. <sup>13</sup>C NMR (125 MHz, DMSO-*d*<sub>6</sub>) spectra of compound **3bh**



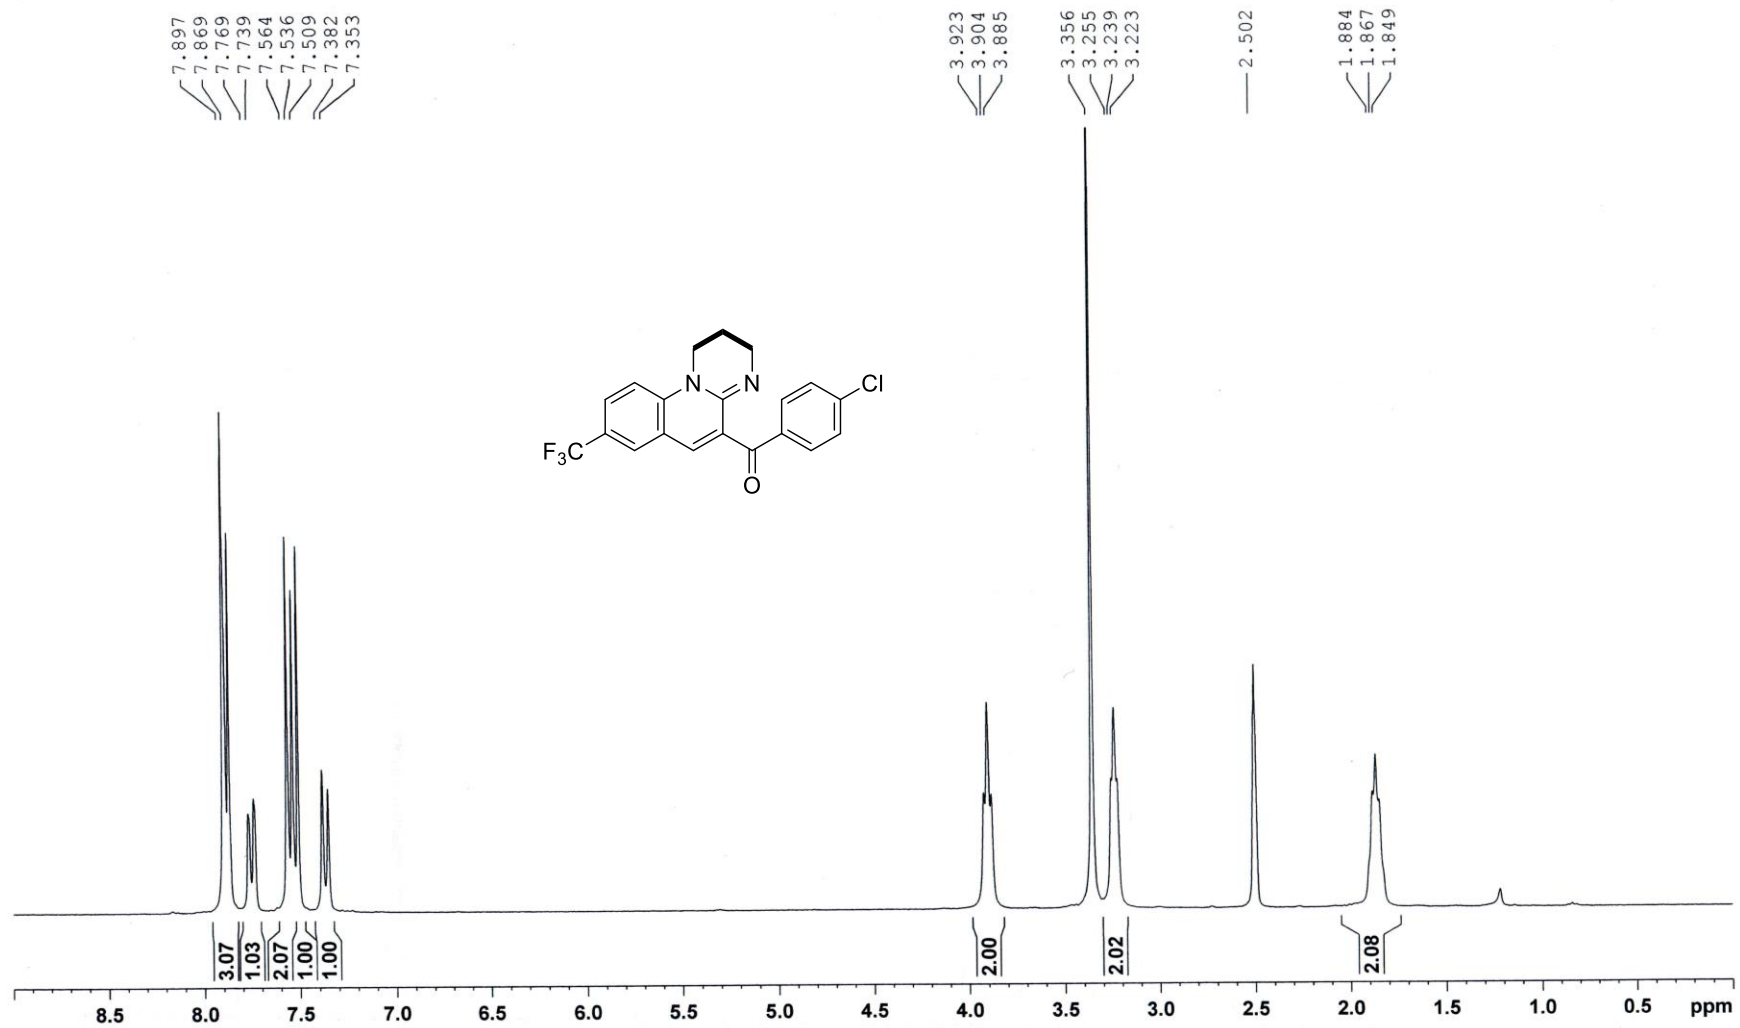

Figure S50. <sup>1</sup>H NMR (300 MHz, DMSO-*d*<sub>6</sub>) spectra of compound **3bi**

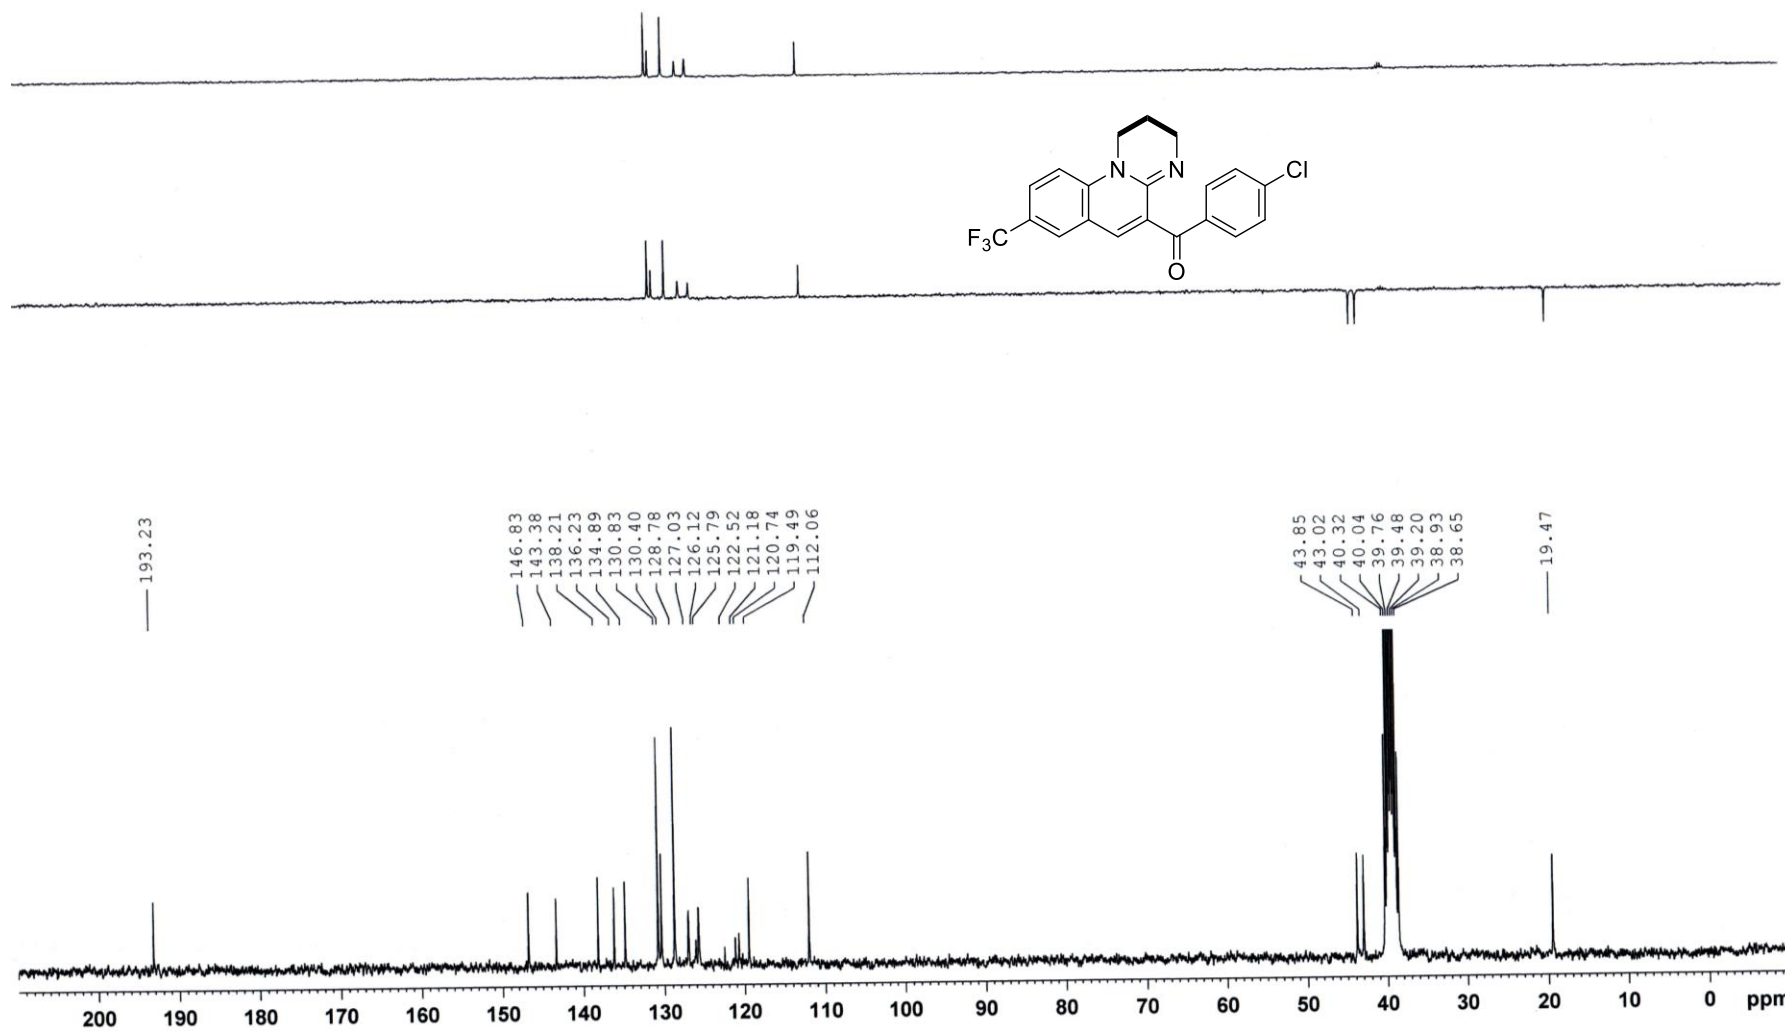

Figure S51.  $^{13}\text{C}$  NMR (75 MHz, DMSO- $d_6$ ) spectra of compound 3bi

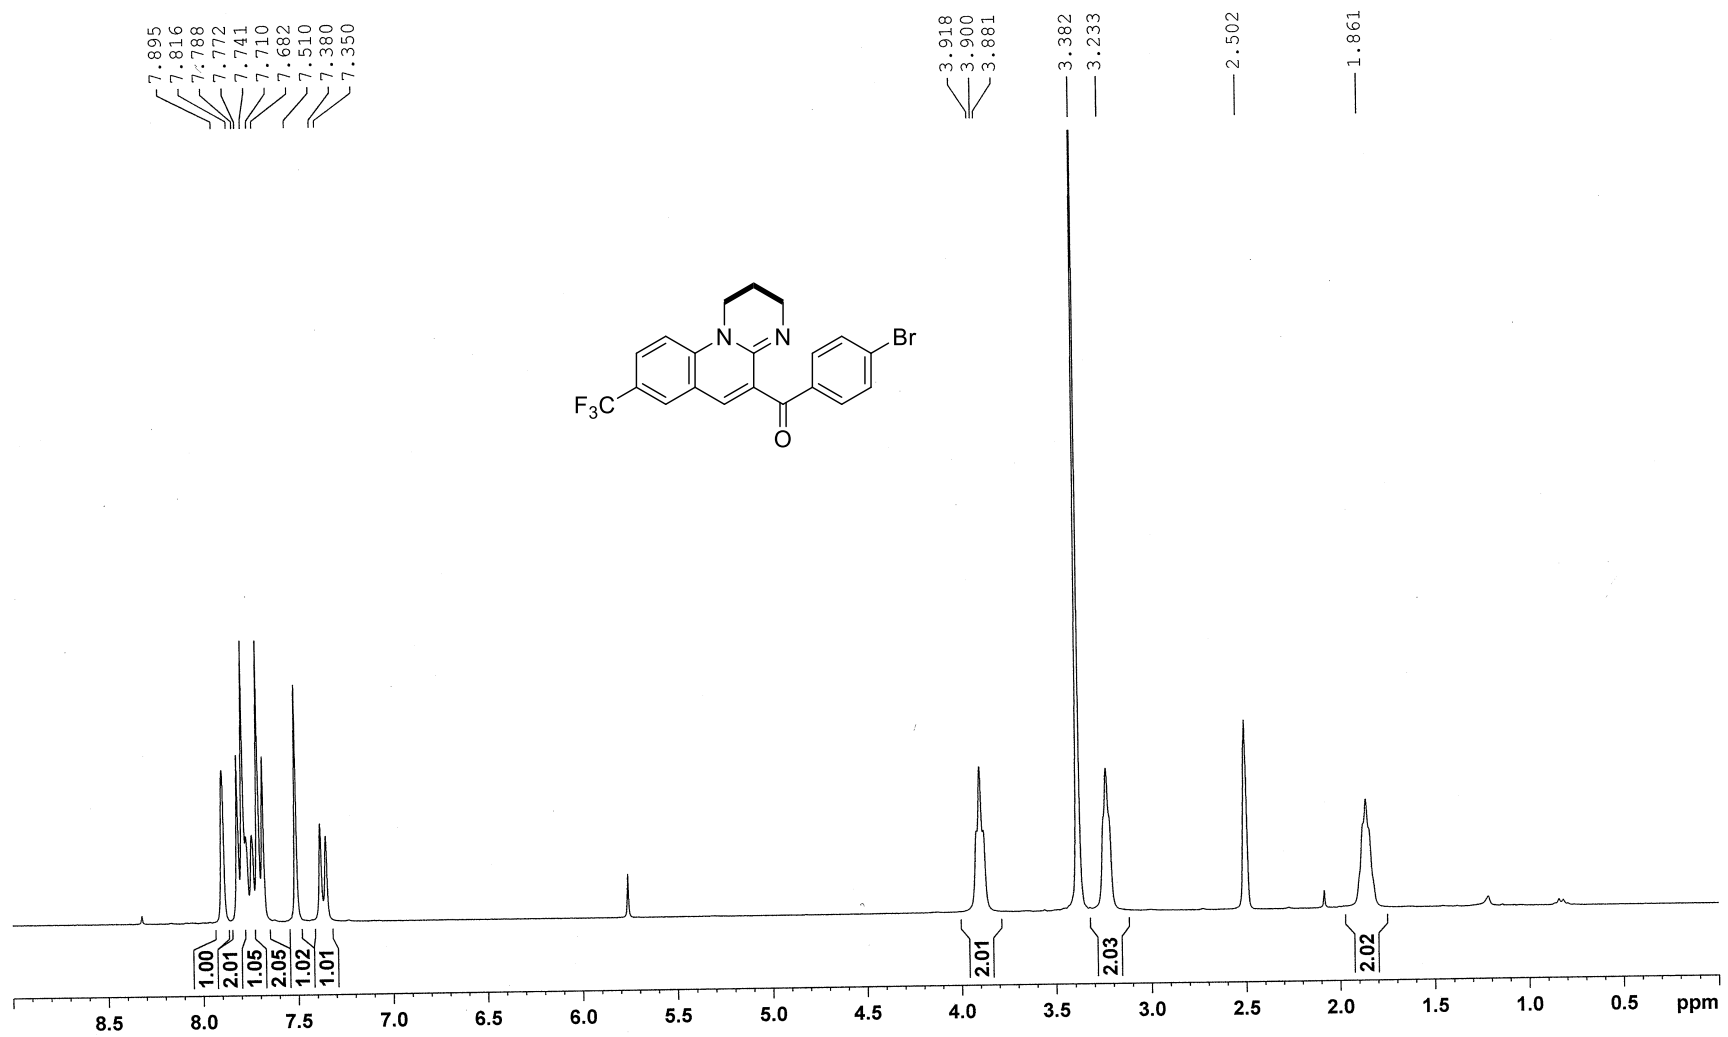

Figure S52. <sup>1</sup>H NMR (300 MHz, DMSO-*d*<sub>6</sub>) spectra of compound **3bj**

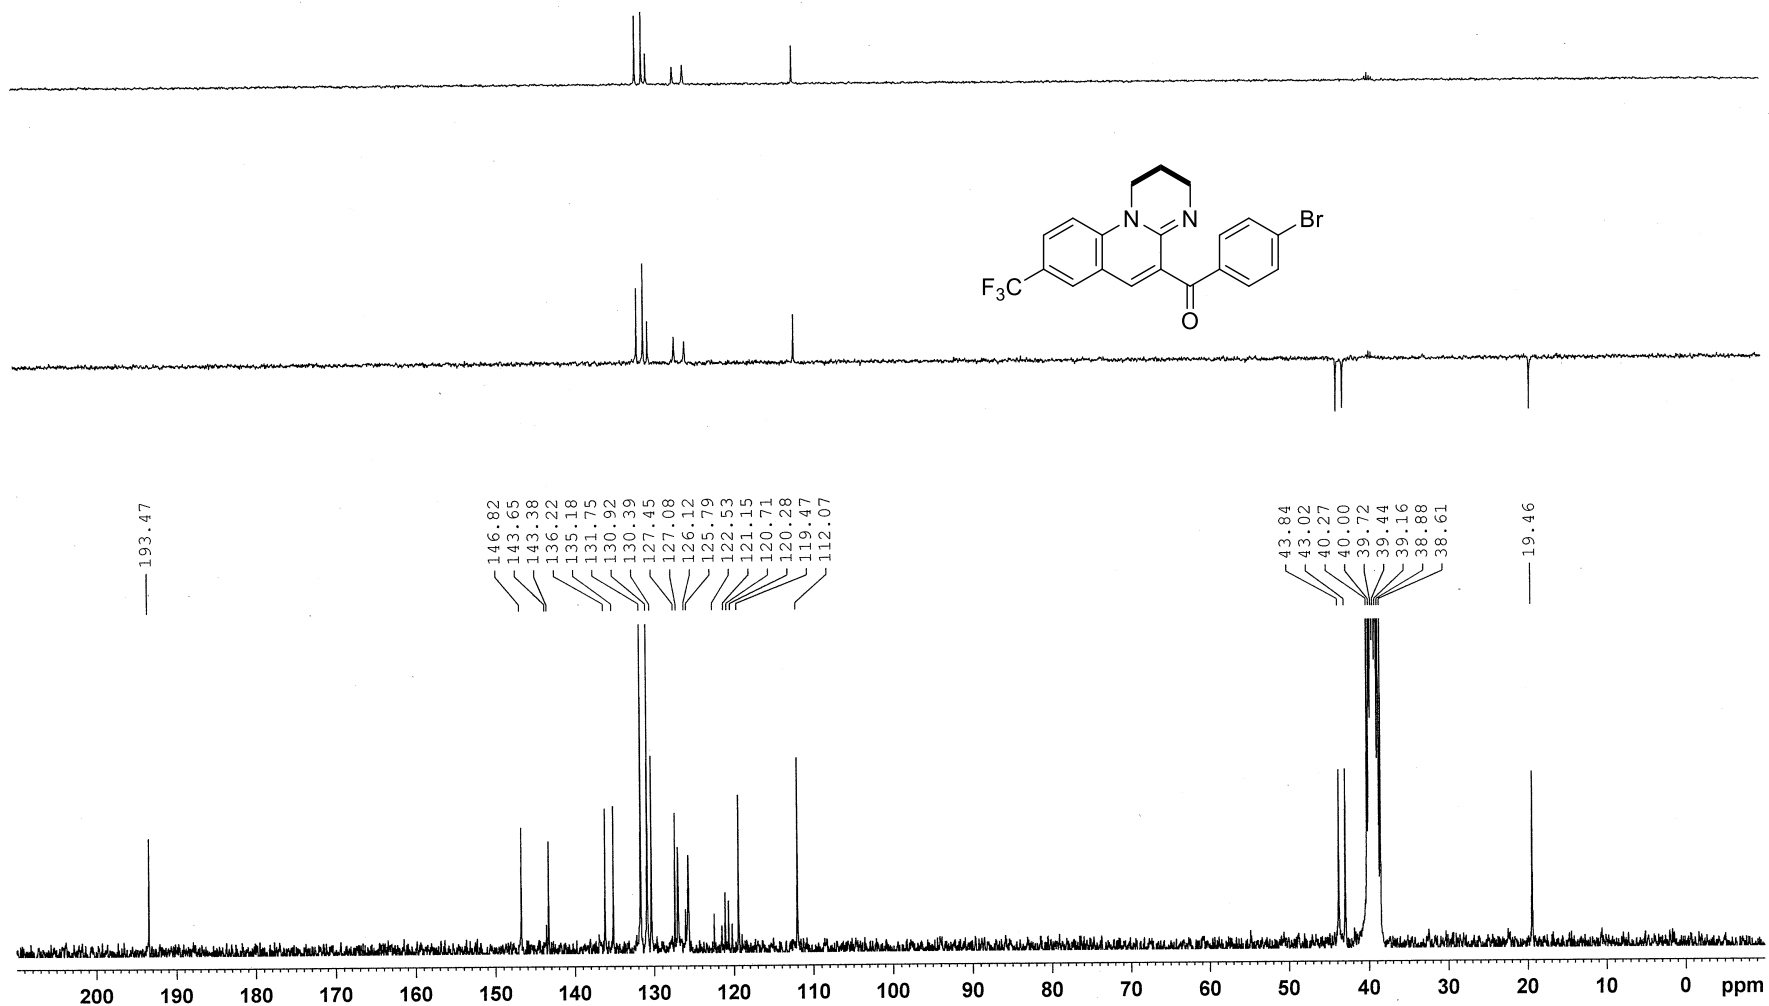

Figure S53.  $^{13}\text{C}$  NMR (75 MHz, DMSO- $d_6$ ) spectra of compound 3bj

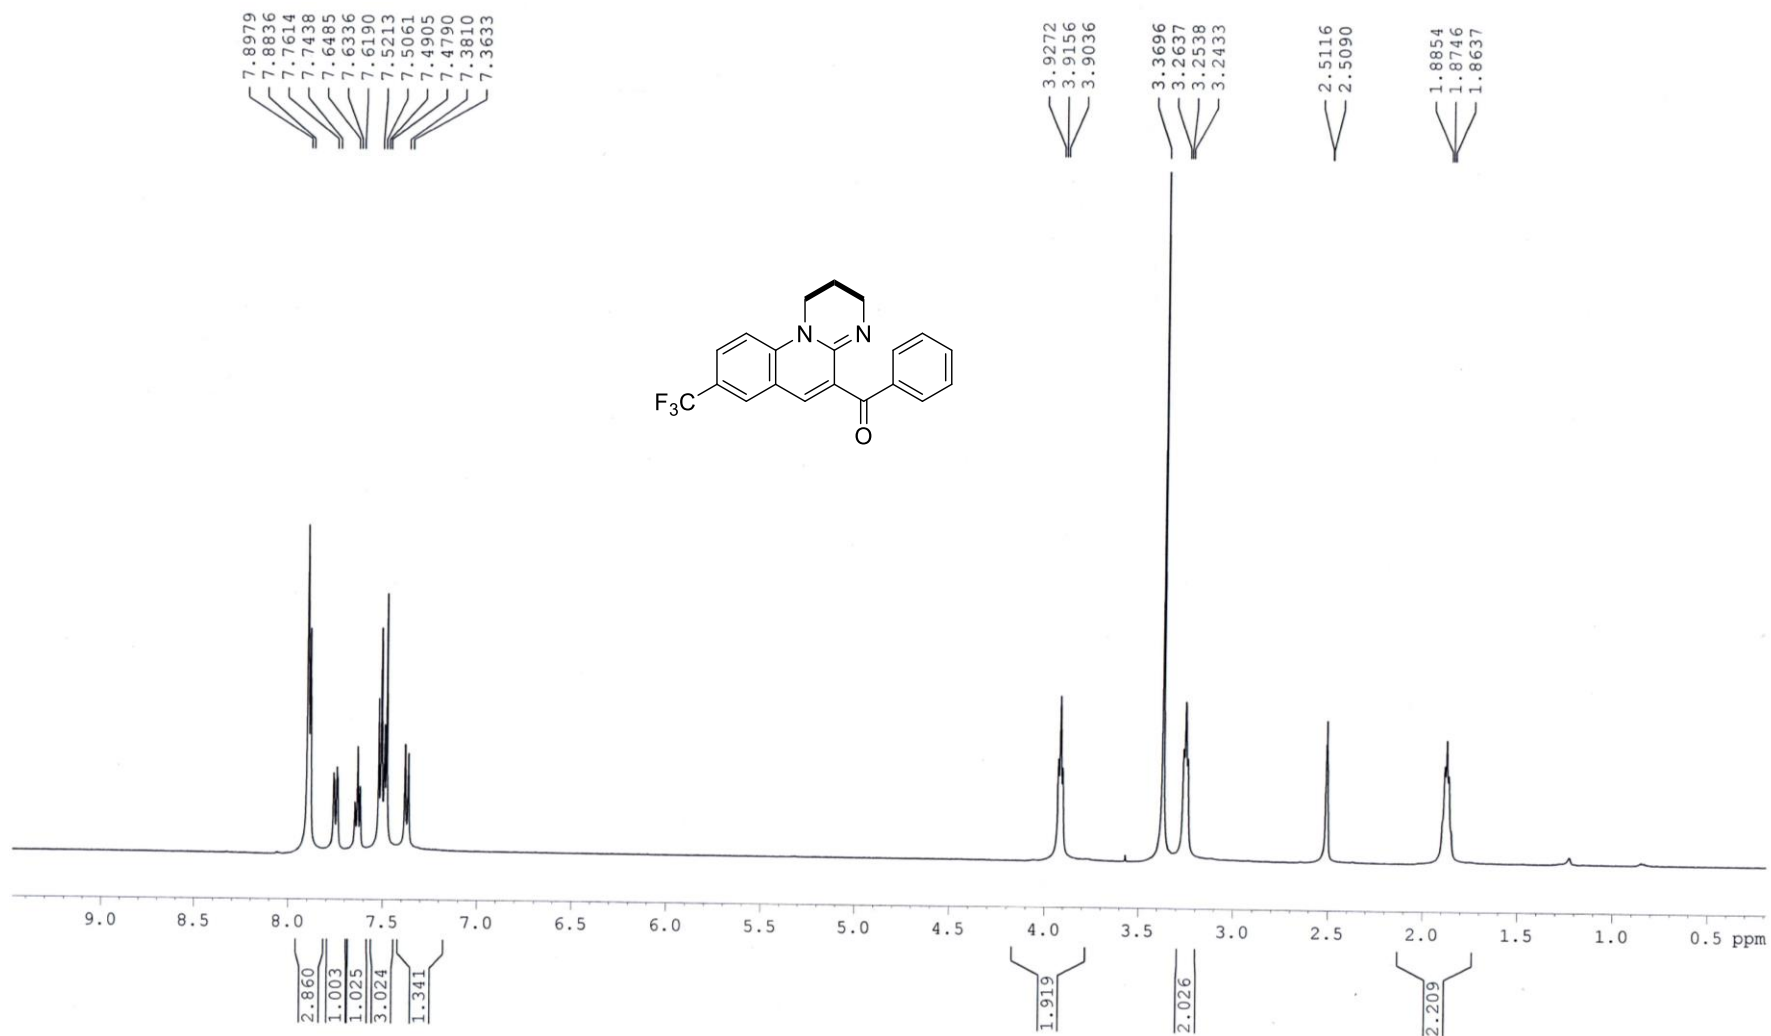

**Figure S54.**  $^1\text{H}$  NMR (500 MHz,  $\text{DMSO-}d_6$ ) spectra of compound **3bk**

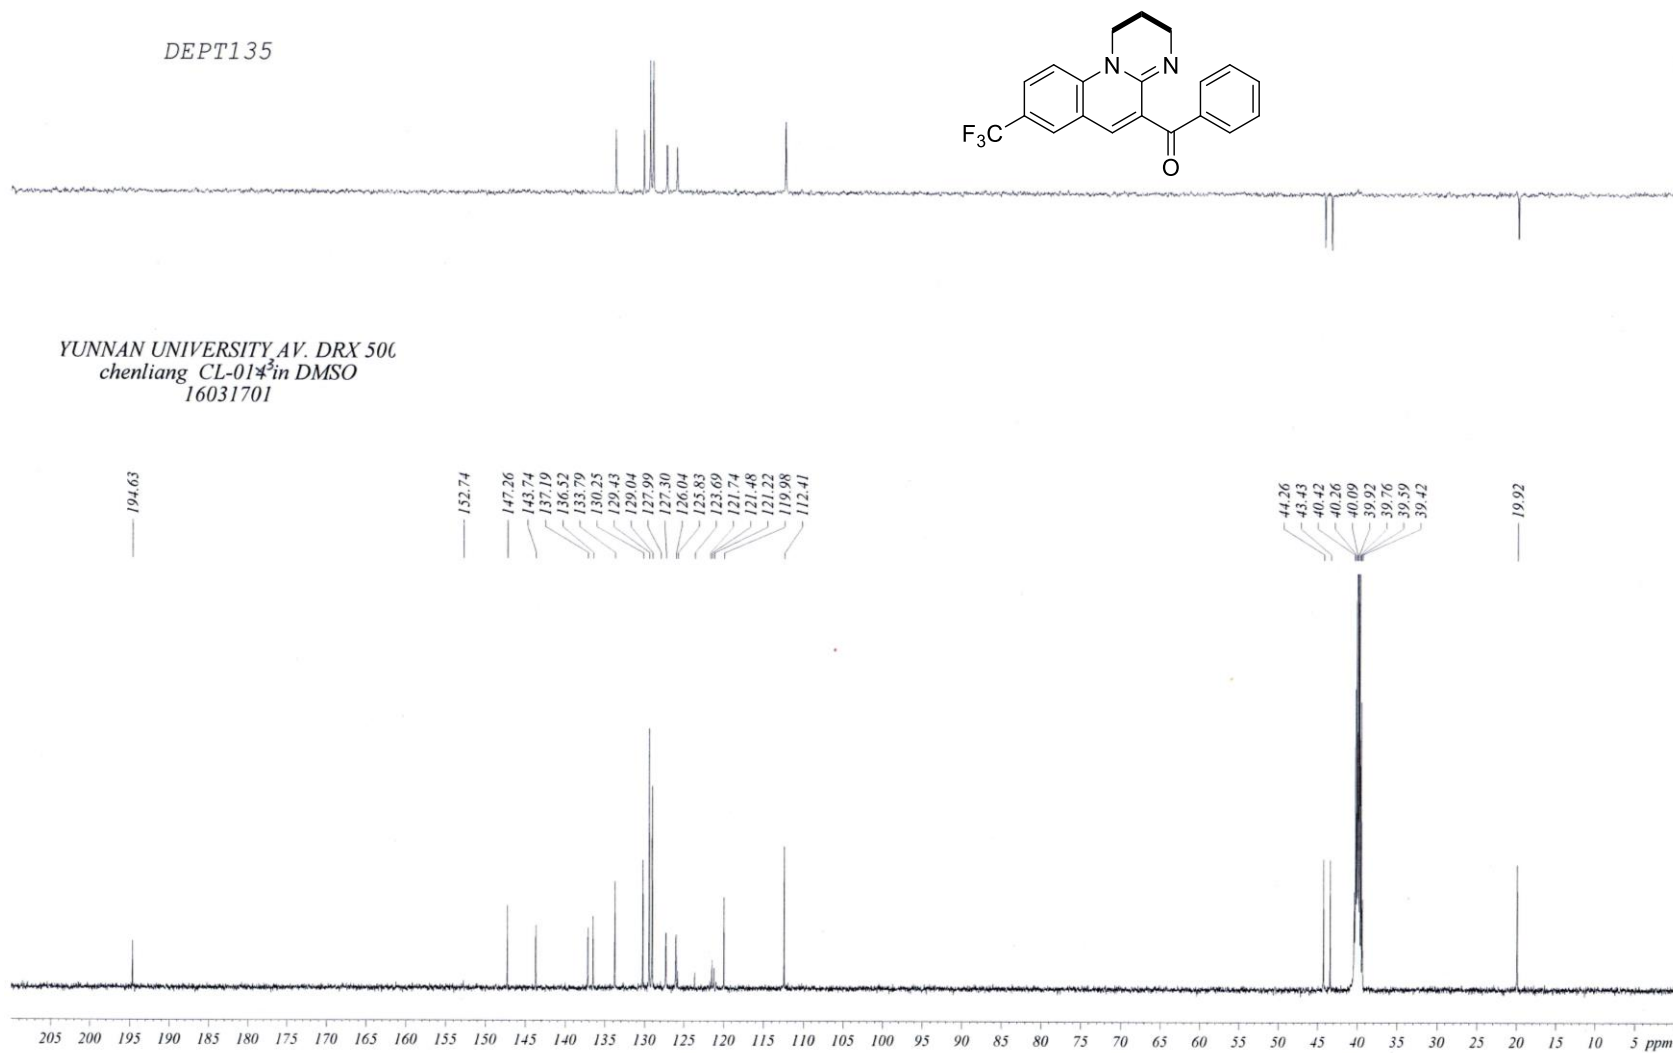

Figure S55.  $^{13}\text{C}$  NMR (125 MHz,  $\text{DMSO}-d_6$ ) spectra of compound **3bk**

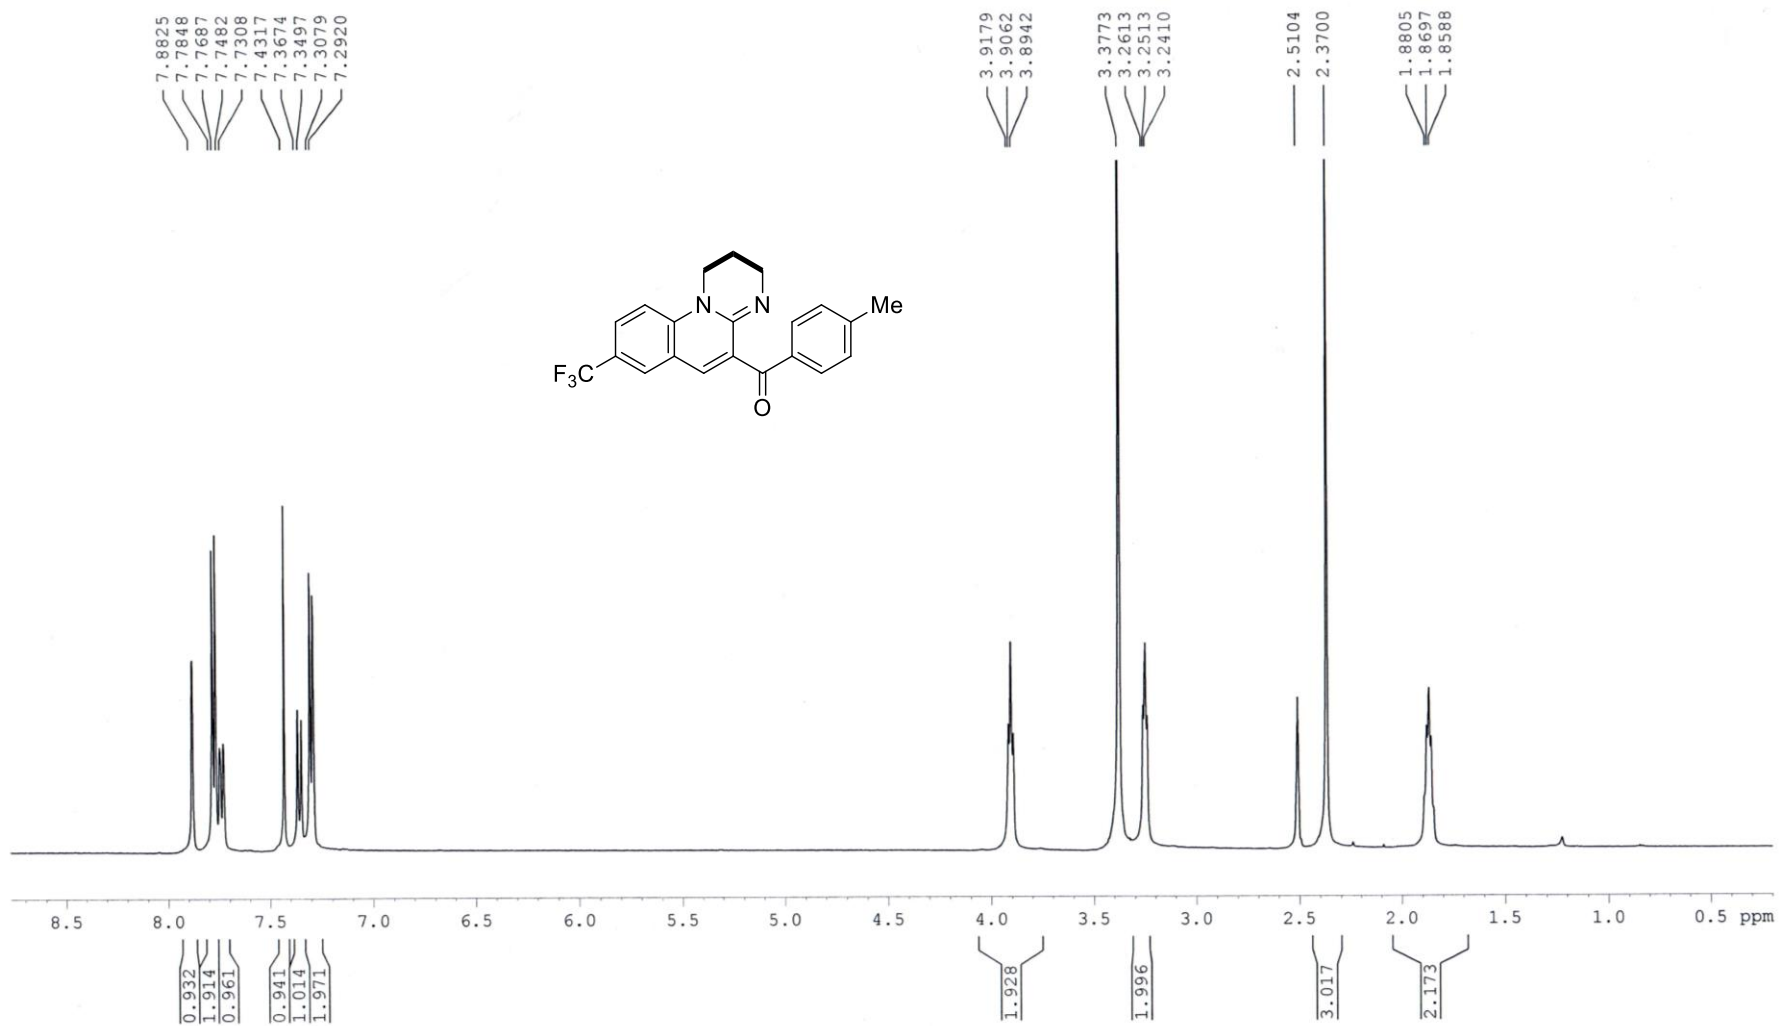

**Figure S56.** <sup>1</sup>H NMR (500 MHz, DMSO-*d*<sub>6</sub>) spectra of compound **3bl**

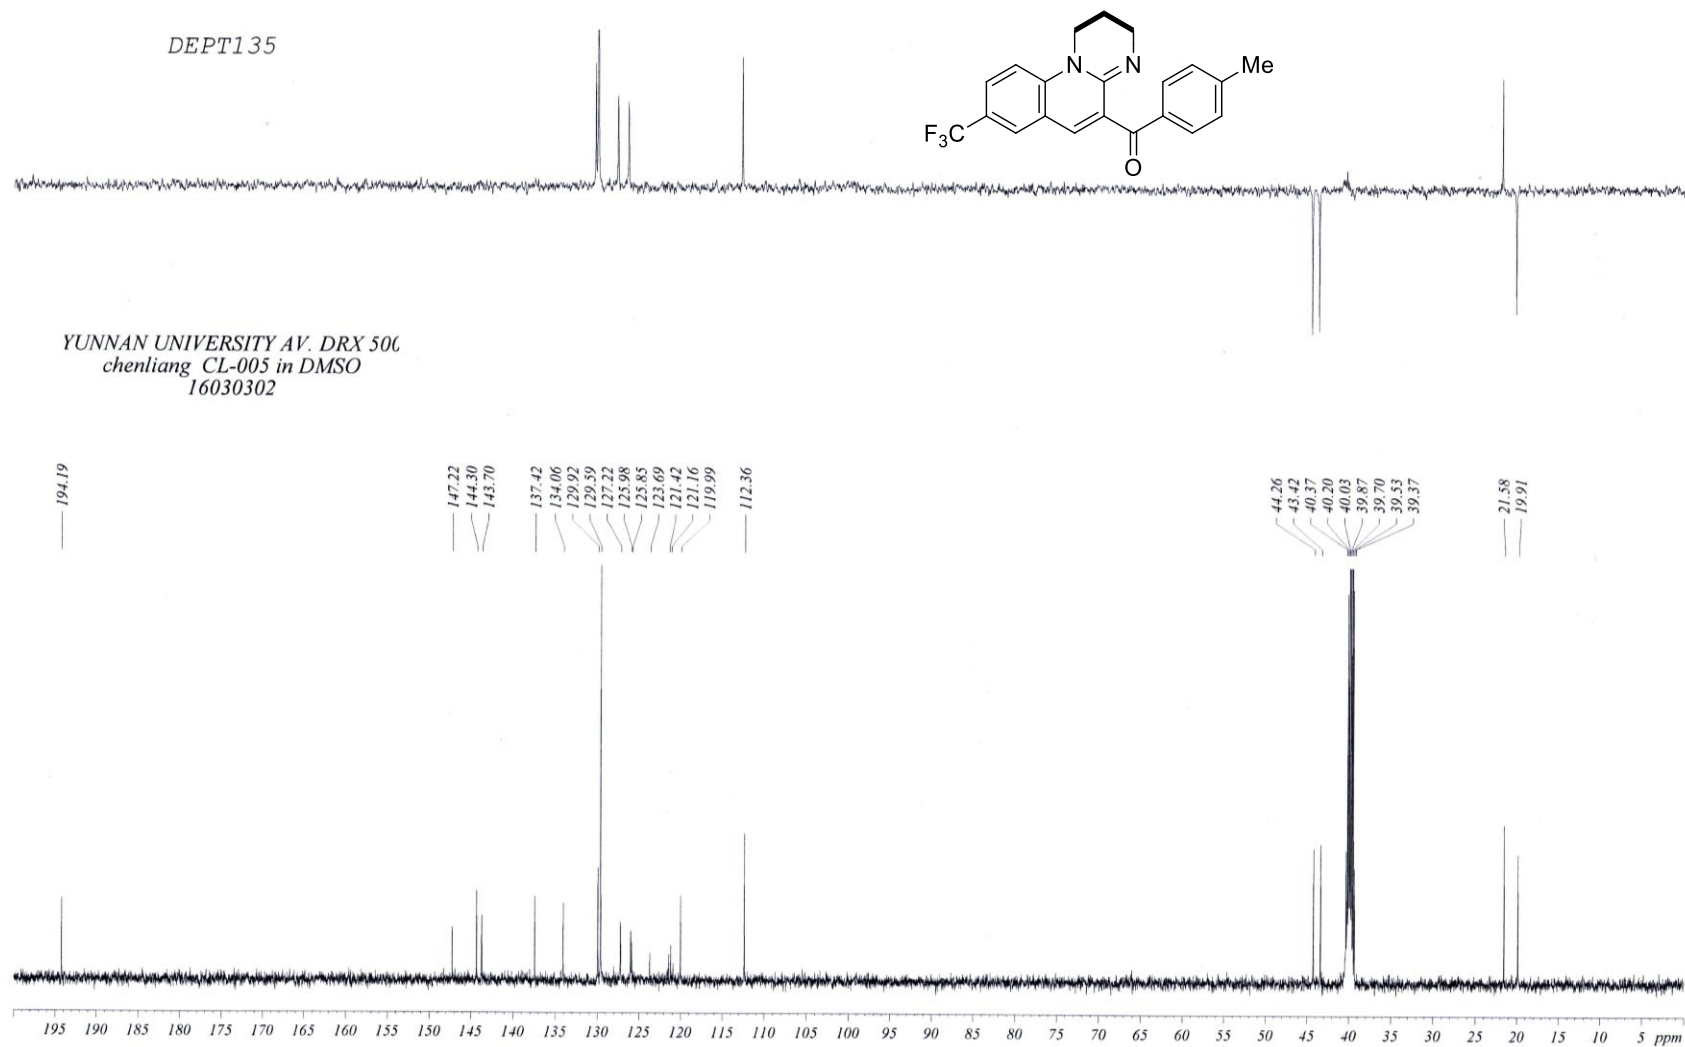

Figure S57.  $^{13}\text{C}$  NMR (125 MHz,  $\text{DMSO-}d_6$ ) spectra of compound **3bl**



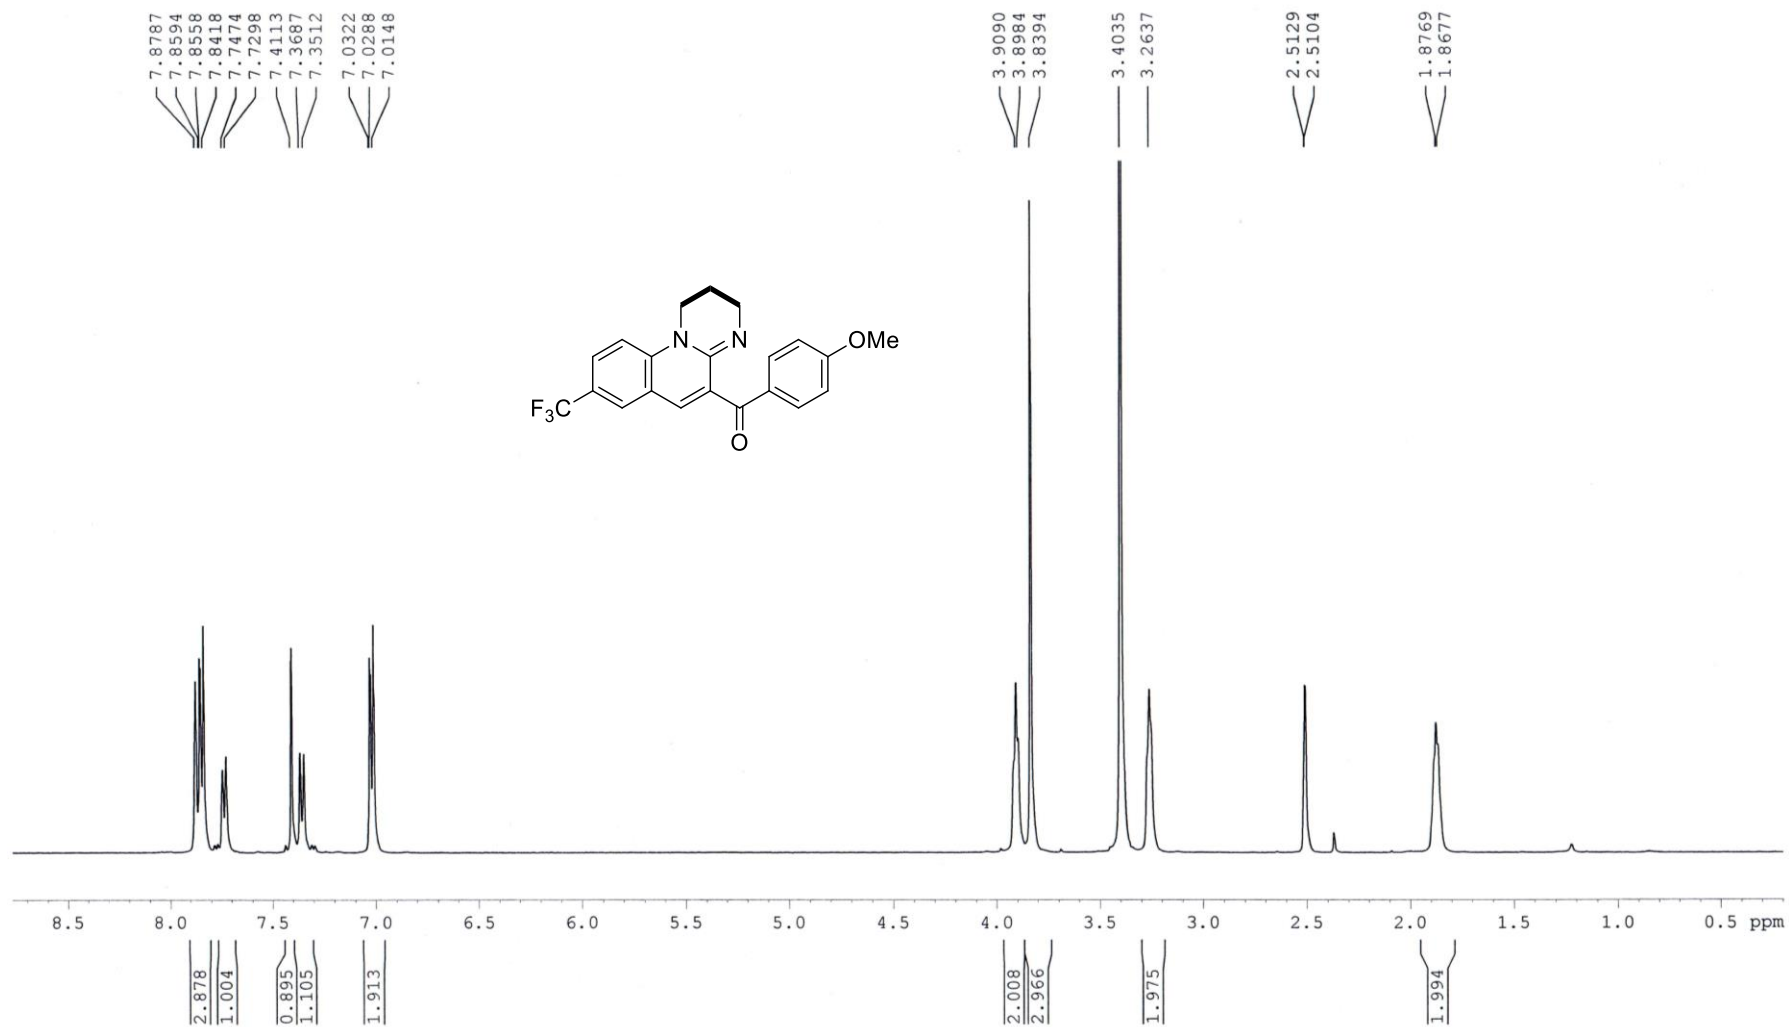

**Figure S58.** <sup>1</sup>H NMR (500 MHz, DMSO-*d*<sub>6</sub>) spectra of compound **3bm**

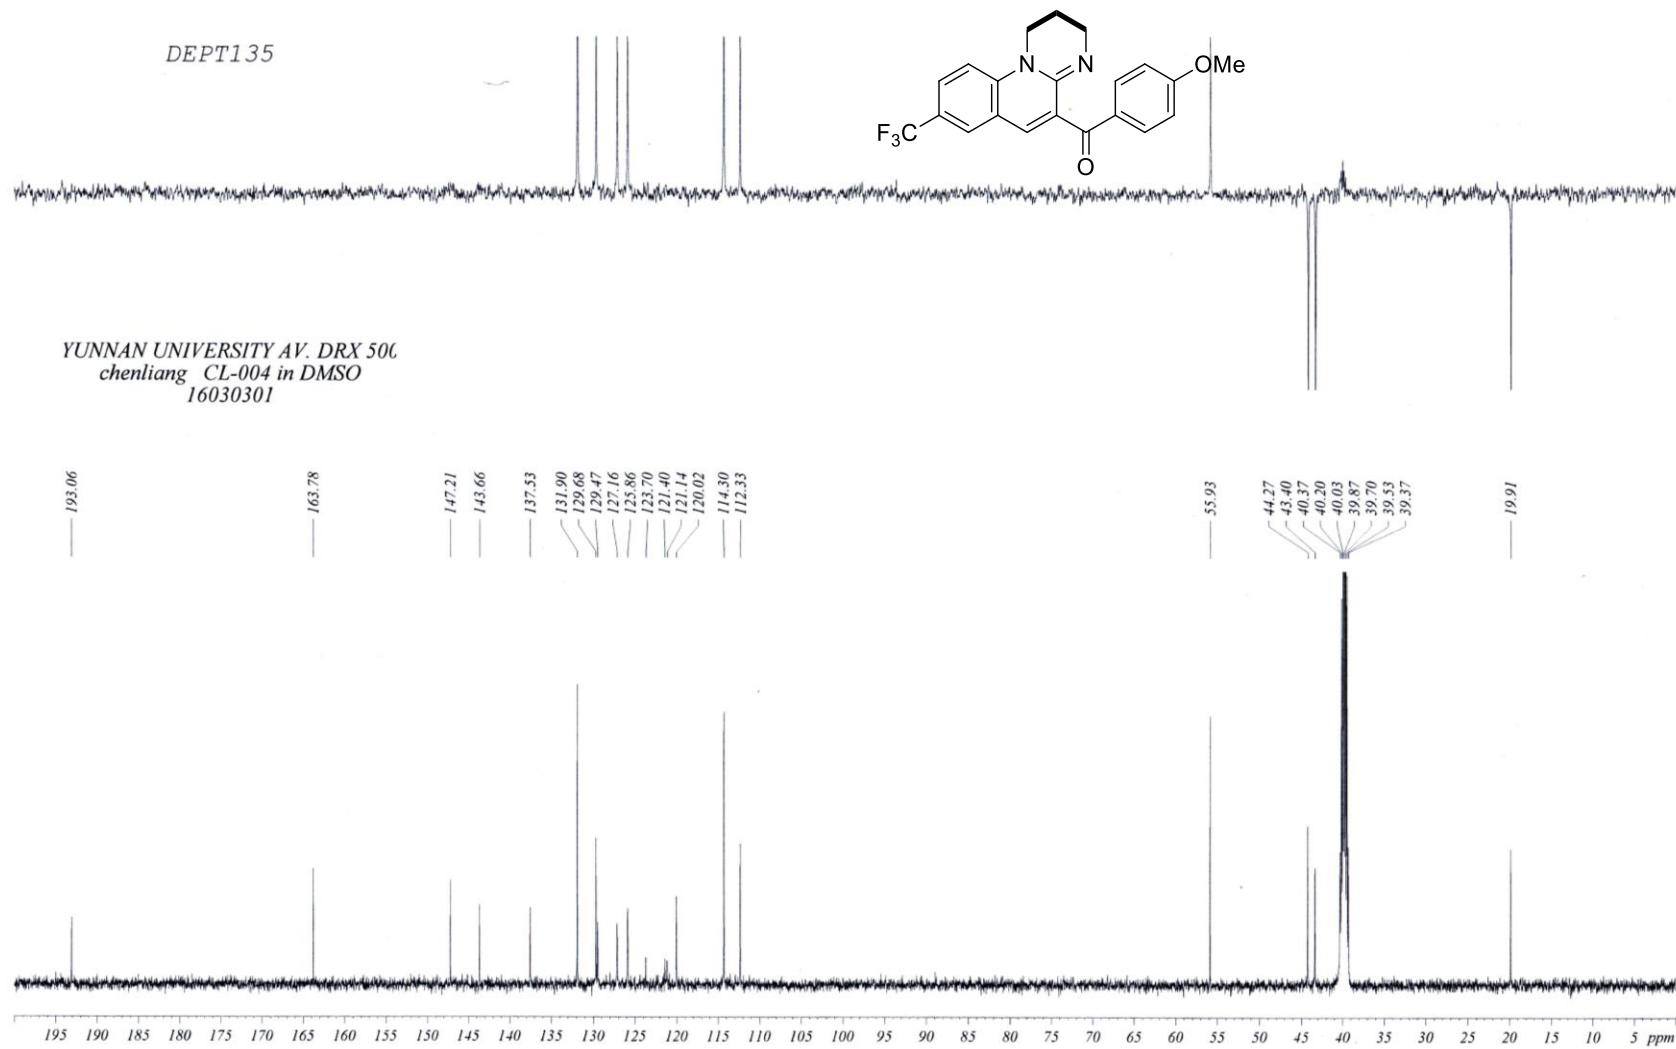

Figure S59.  $^{13}\text{C}$  NMR (125 MHz, DMSO- $d_6$ ) spectra of compound 3bm

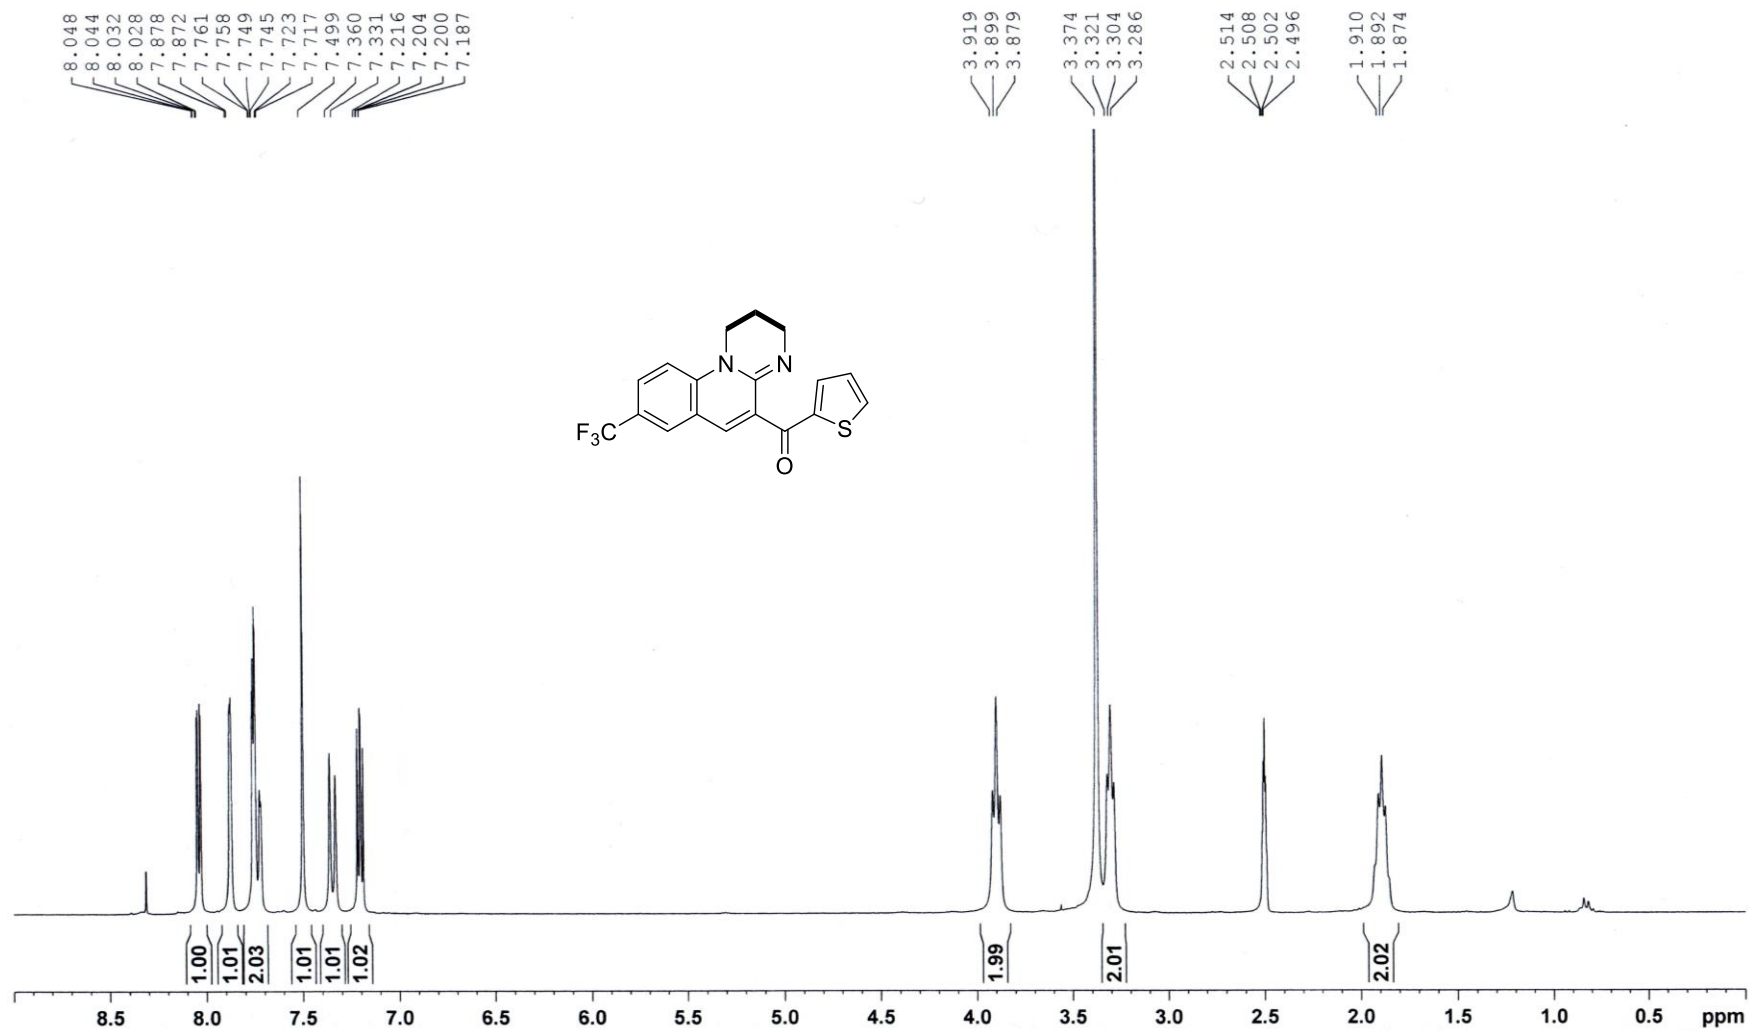

Figure S60. <sup>1</sup>H NMR (300 MHz, DMSO-*d*<sub>6</sub>) spectra of compound **3bn**

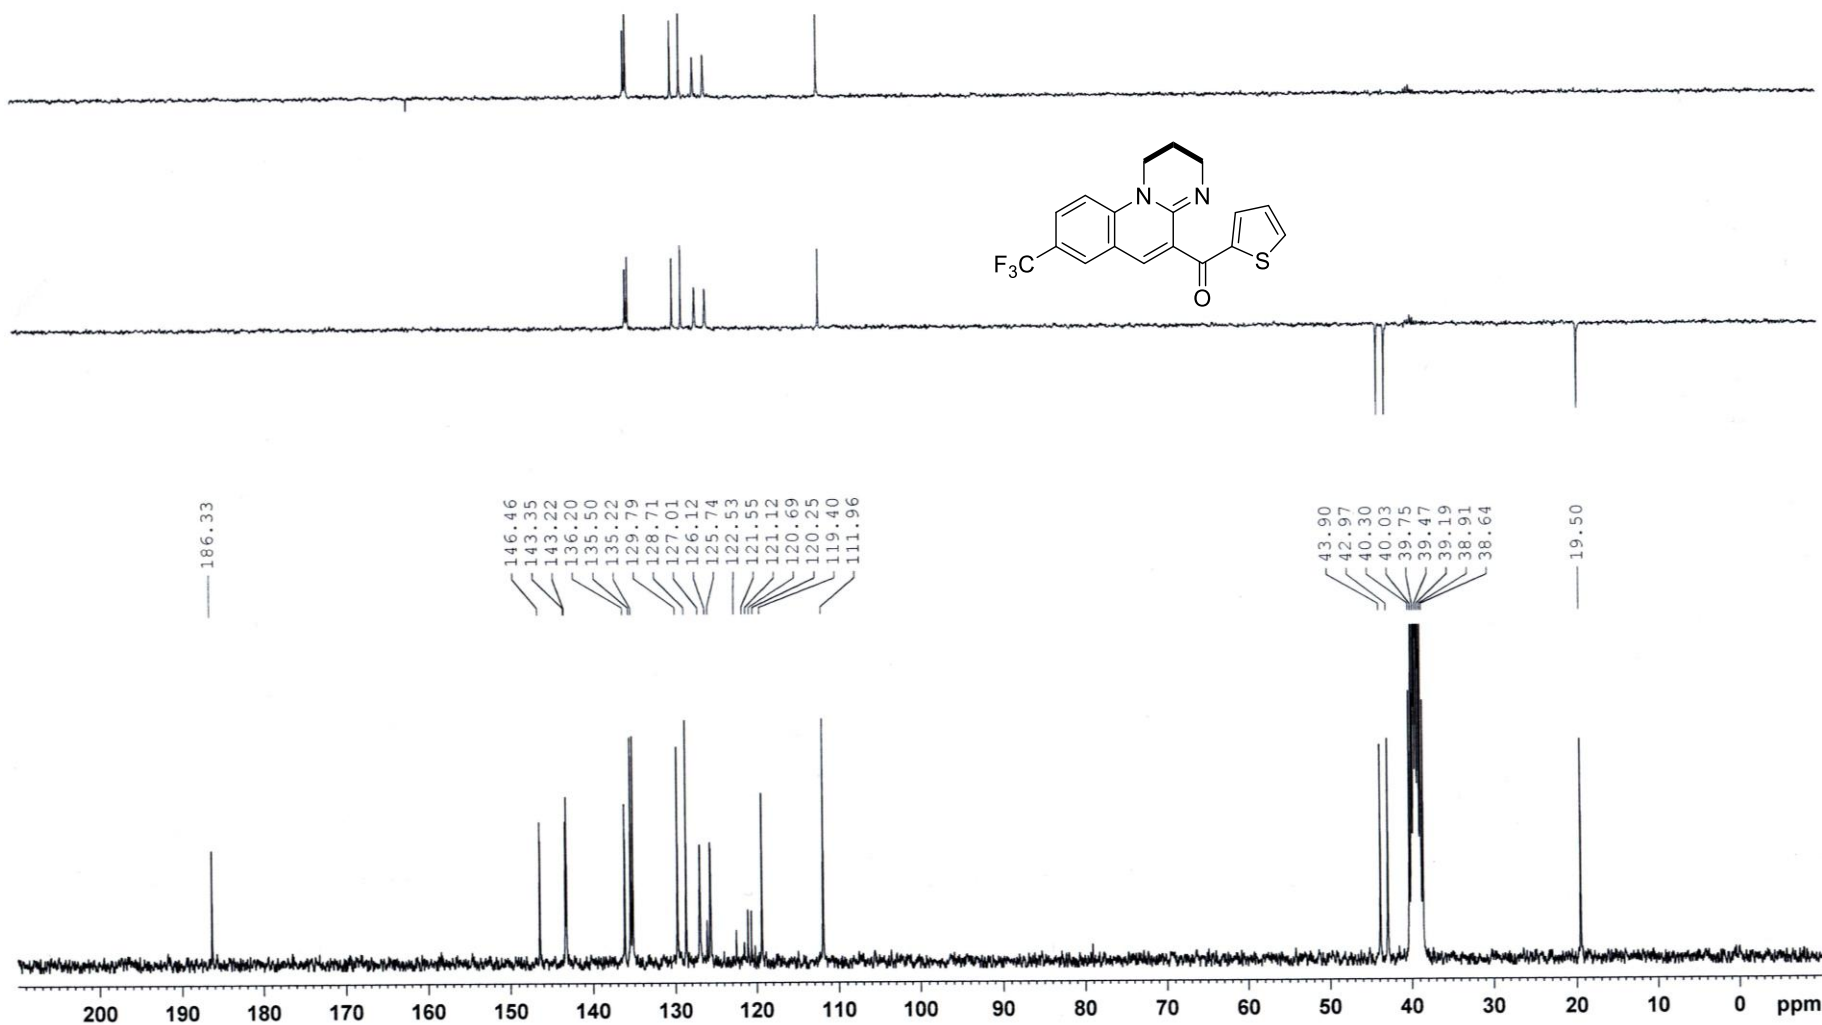

Figure S61.  $^{13}\text{C}$  NMR (75 MHz,  $\text{DMSO-}d_6$ ) spectra of compound **3bn**

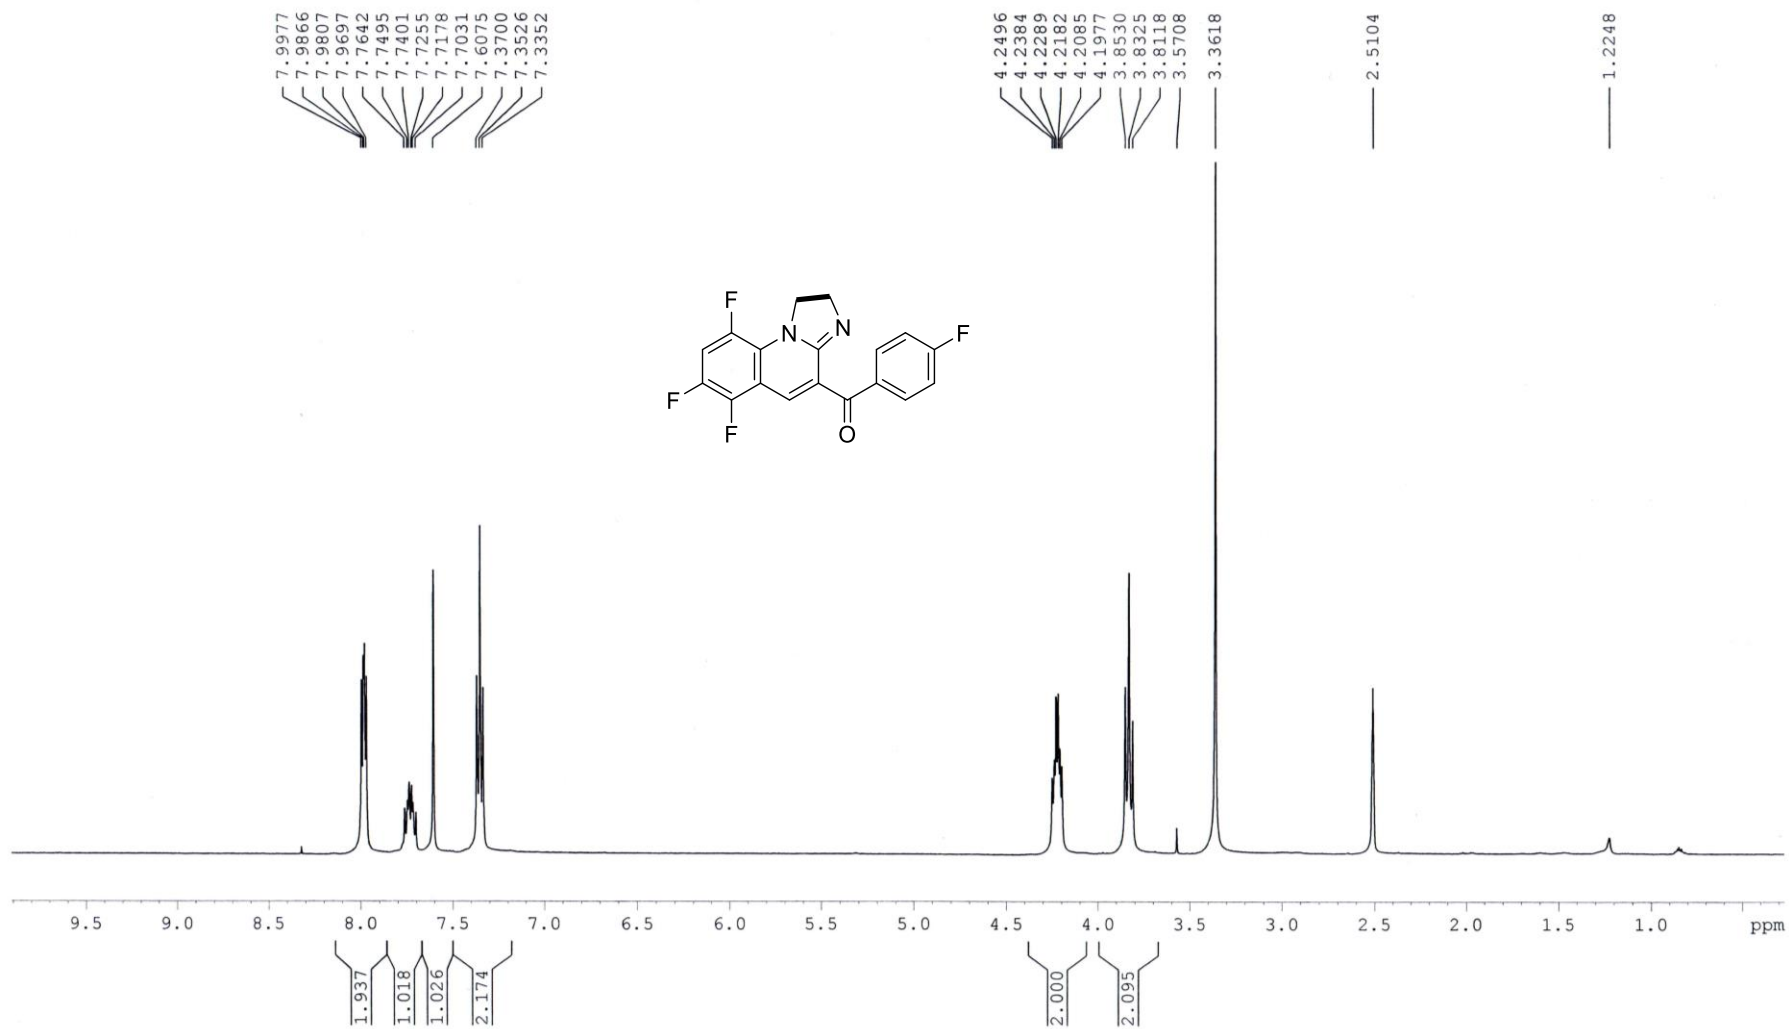

**Figure S62.** <sup>1</sup>H NMR (500 MHz, DMSO-*d*<sub>6</sub>) spectra of compound 3ca

DEPT135

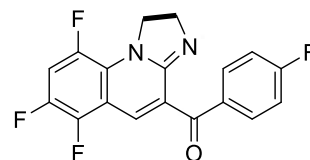

YUNNAN UNIVERSITY AV. DRX 50C  
chenliang CL-012 in DMSO  
16031602

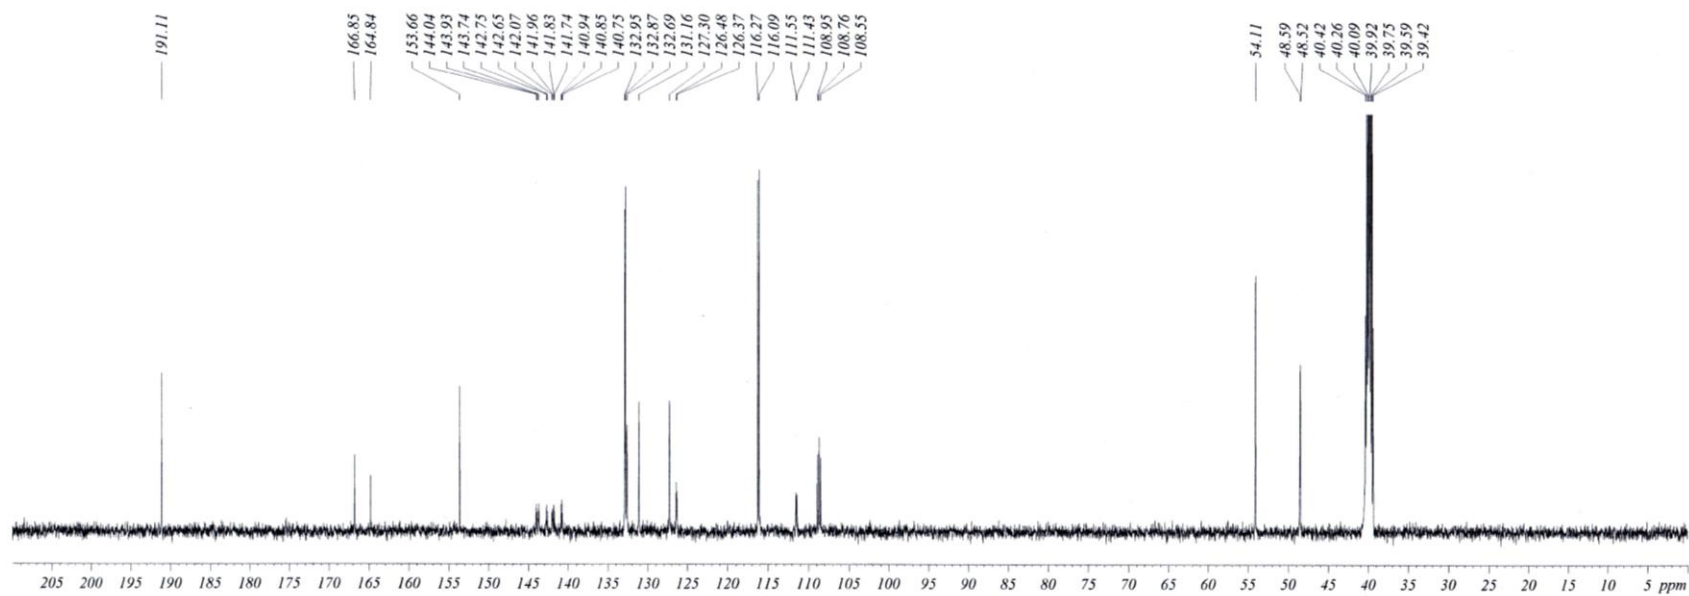

Figure S63.  $^{13}\text{C}$  NMR (125 MHz,  $\text{DMSO-}d_6$ ) spectra of compound **3ca**

YUNNAN UNIVERSITY ASCEND III 600  
CL-012 inDMSO  
20160316 19F

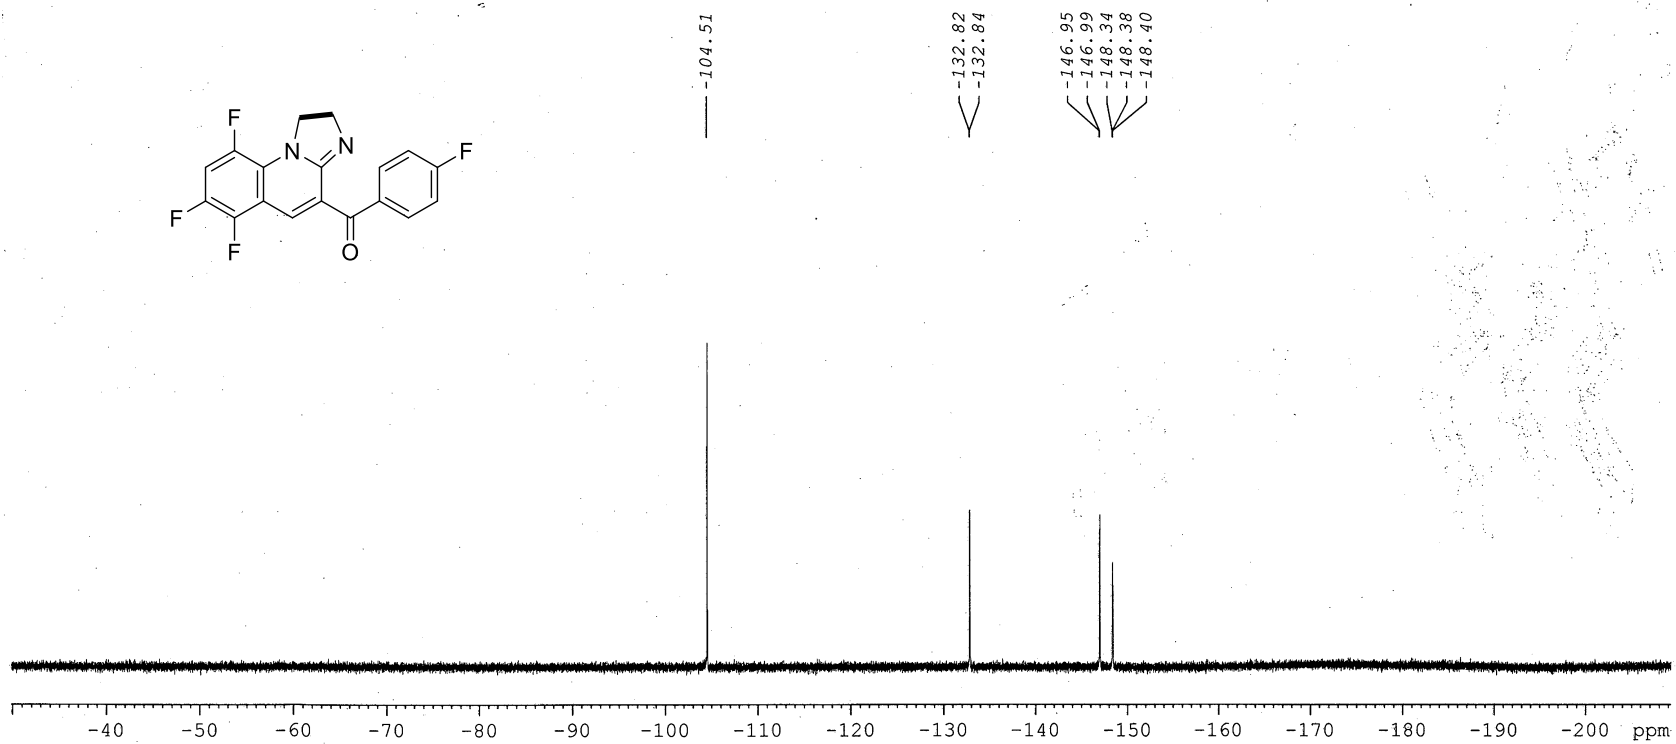

Figure S64.  $^{19}\text{F}$  NMR (565 MHz,  $\text{DMSO-}d_6$ ) spectra of compound **3ca**

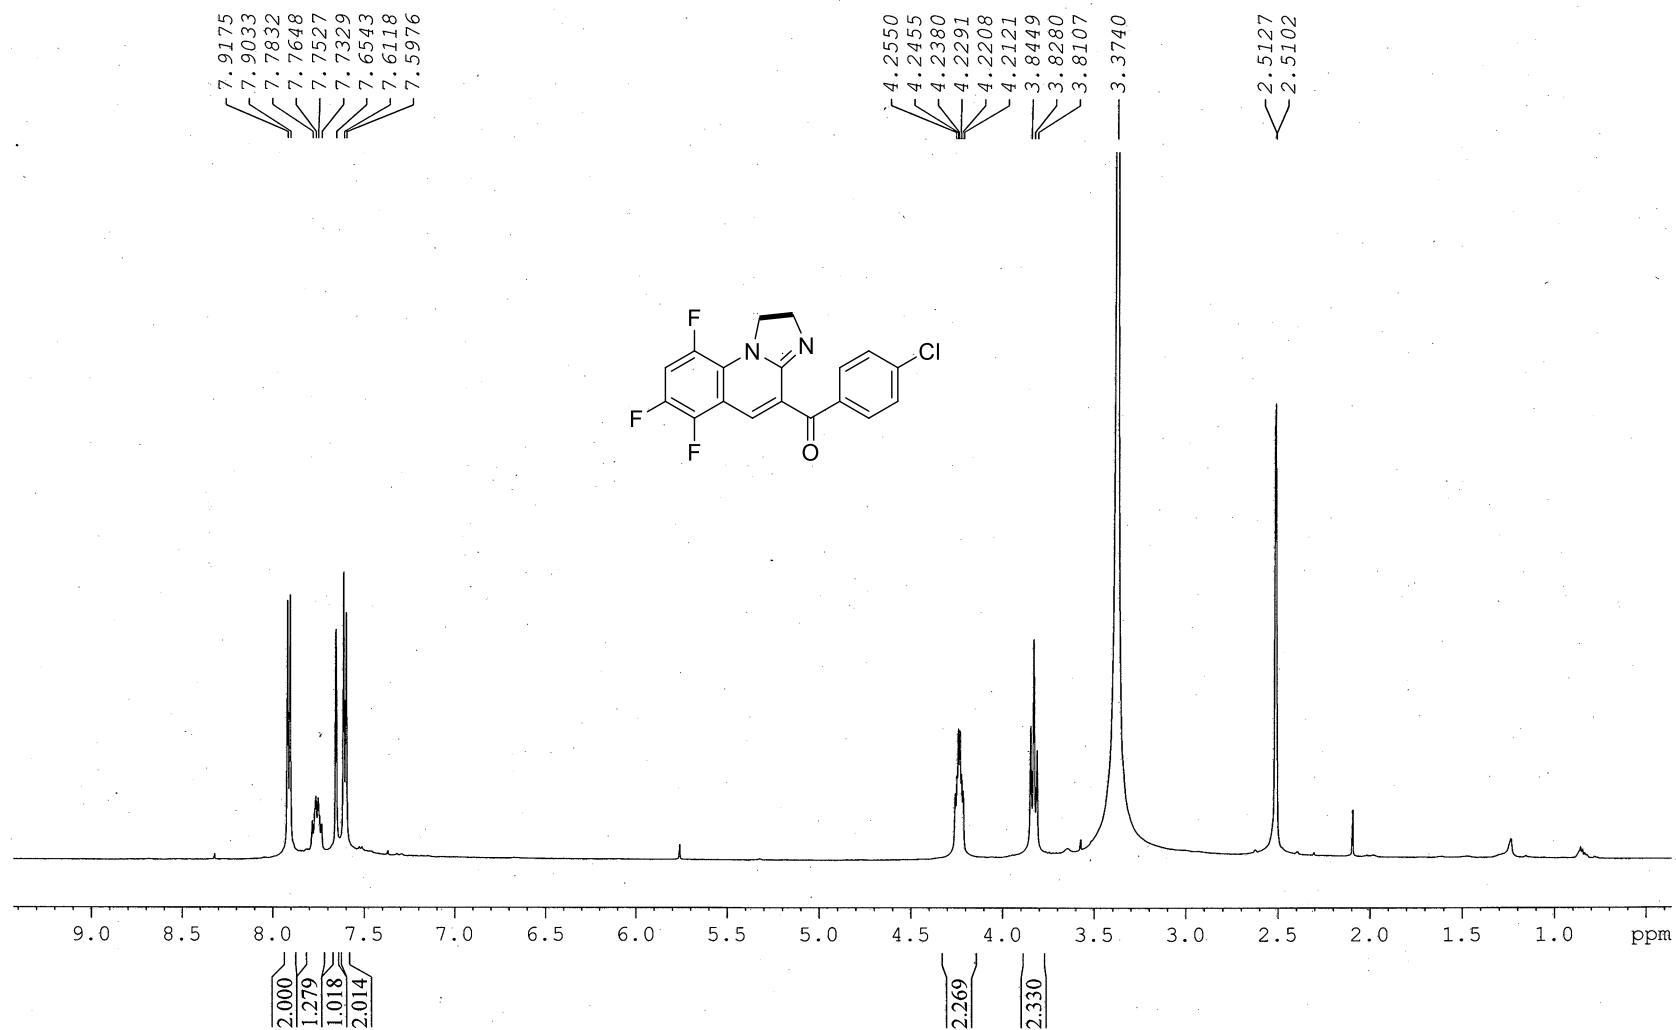

Figure S65.  $^1\text{H}$  NMR (600 MHz,  $\text{DMSO-}d_6$ ) spectra of compound 3cb



DEPT135

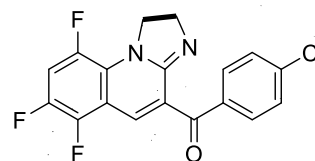

YUNNAN UNIVERSITY ASCEND III 600  
chenliang CL-021 in DMSO

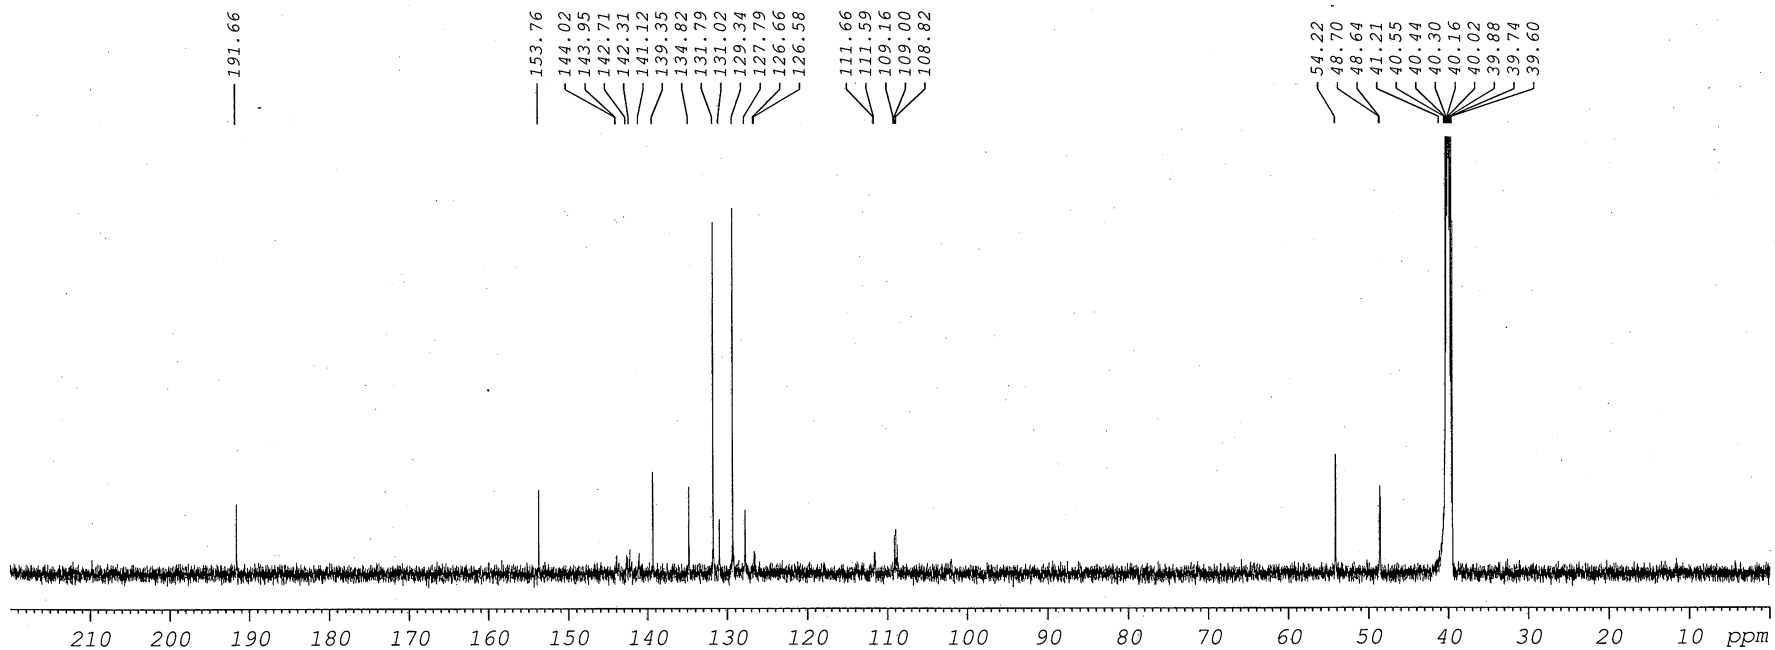

Figure S66.  $^{13}\text{C}$  NMR (150 MHz,  $\text{DMSO-}d_6$ ) spectra of compound **3cb**

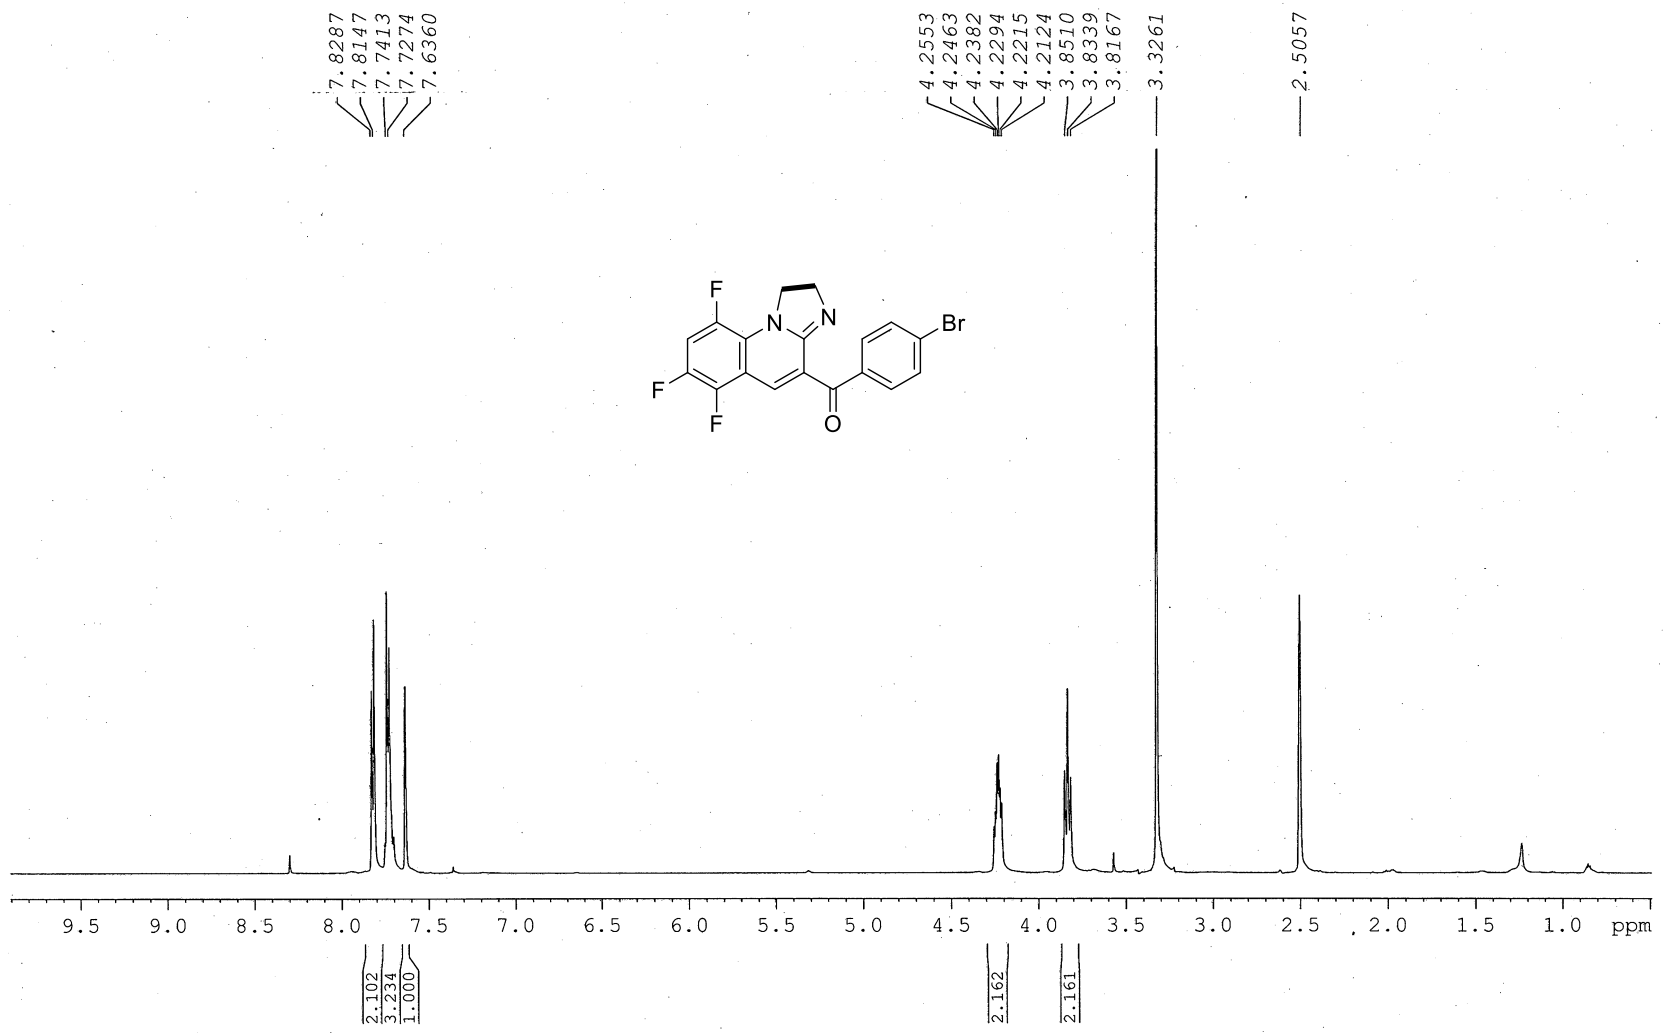

**Figure S67.**  $^1\text{H}$  NMR (600 MHz,  $\text{DMSO-}d_6$ ) spectra of compound **3cc**

DEPT135

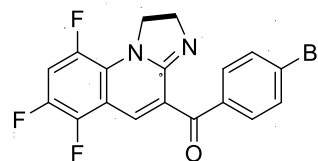

YUNNAN UNIVERSITY ASCEND III 600  
CL-32 in DMSO  
2016042903

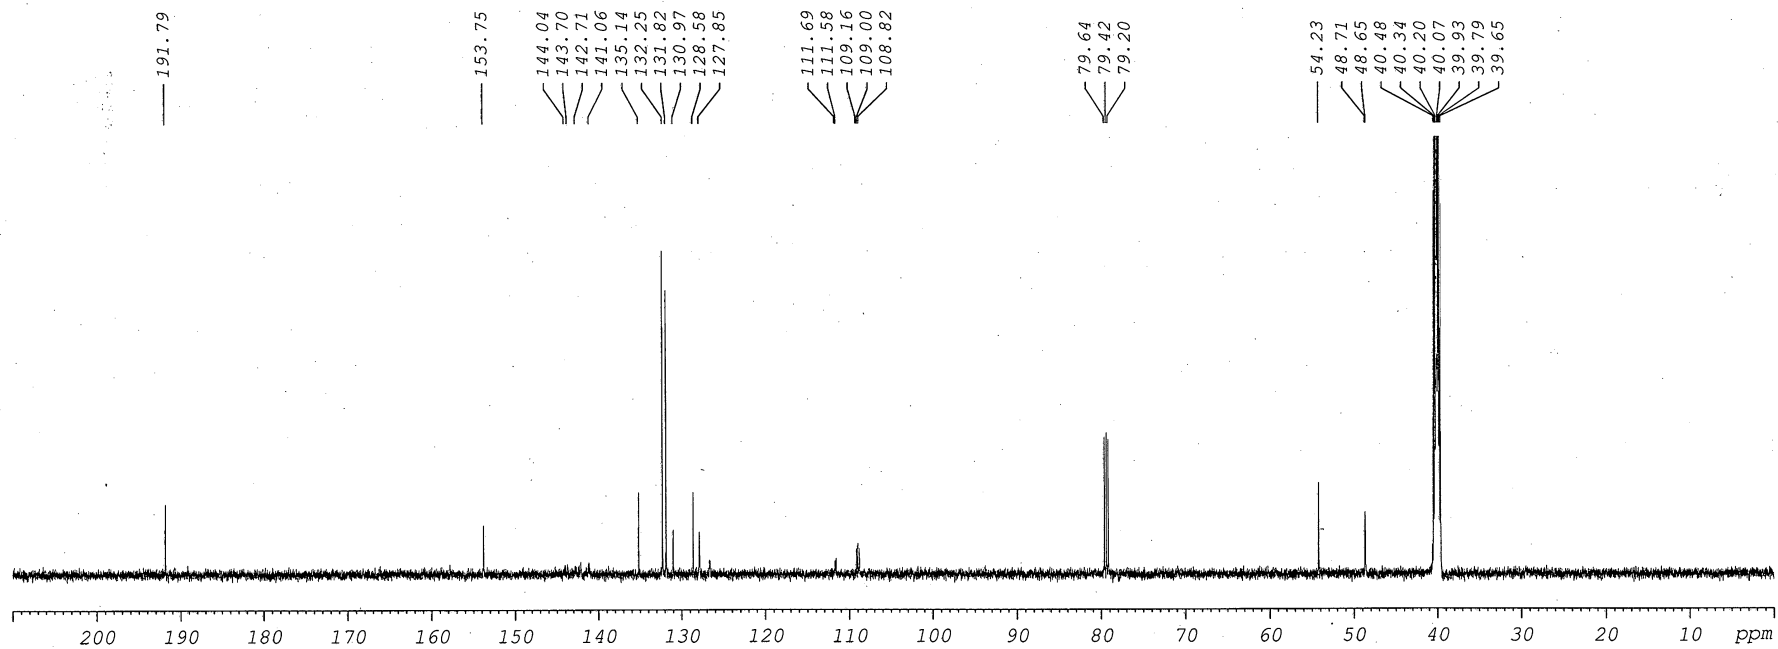

Figure S68.  $^{13}\text{C}$  NMR (150 MHz,  $\text{DMSO-}d_6$ ) spectra of compound **3cc**

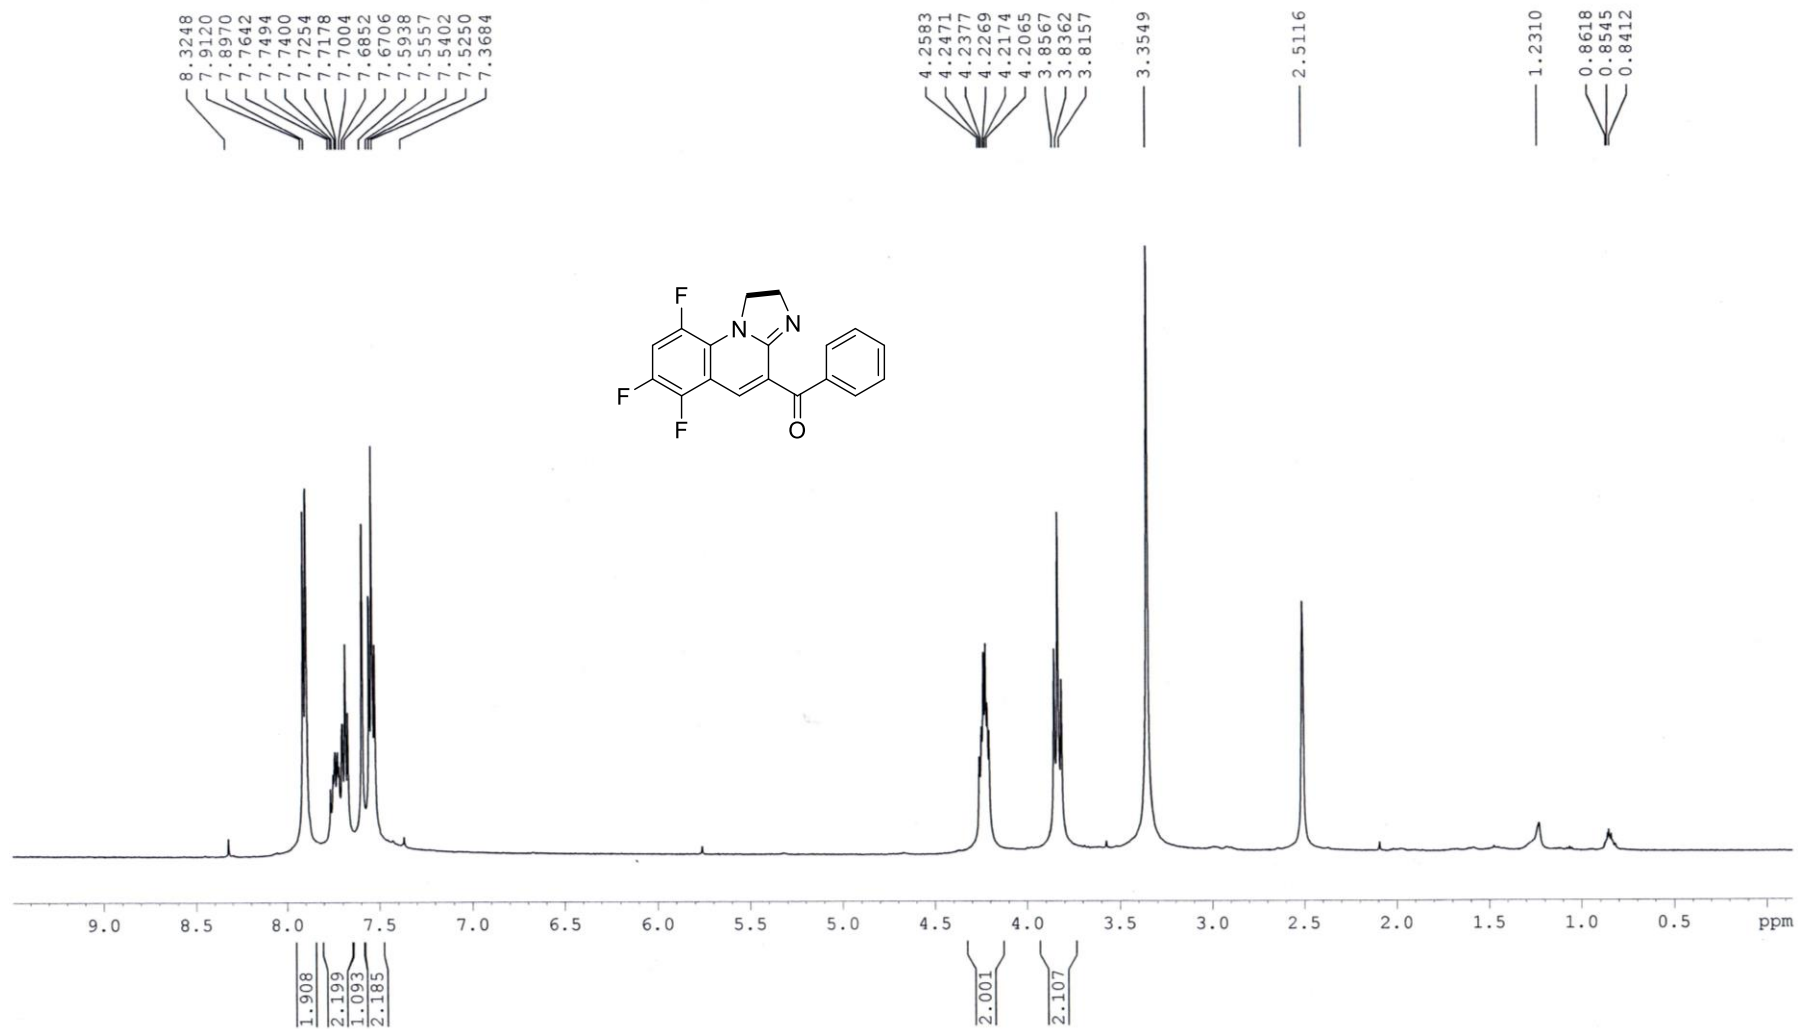

**Figure S69.** <sup>1</sup>H NMR (500 MHz, DMSO-*d*<sub>6</sub>) spectra of compound 3cd

DEPT135

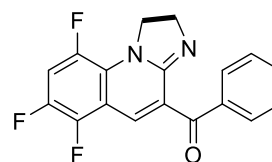

YUNNAN UNIVERSITY AV. DRX 50C  
chenliang CL-011 in DMSO  
16031601

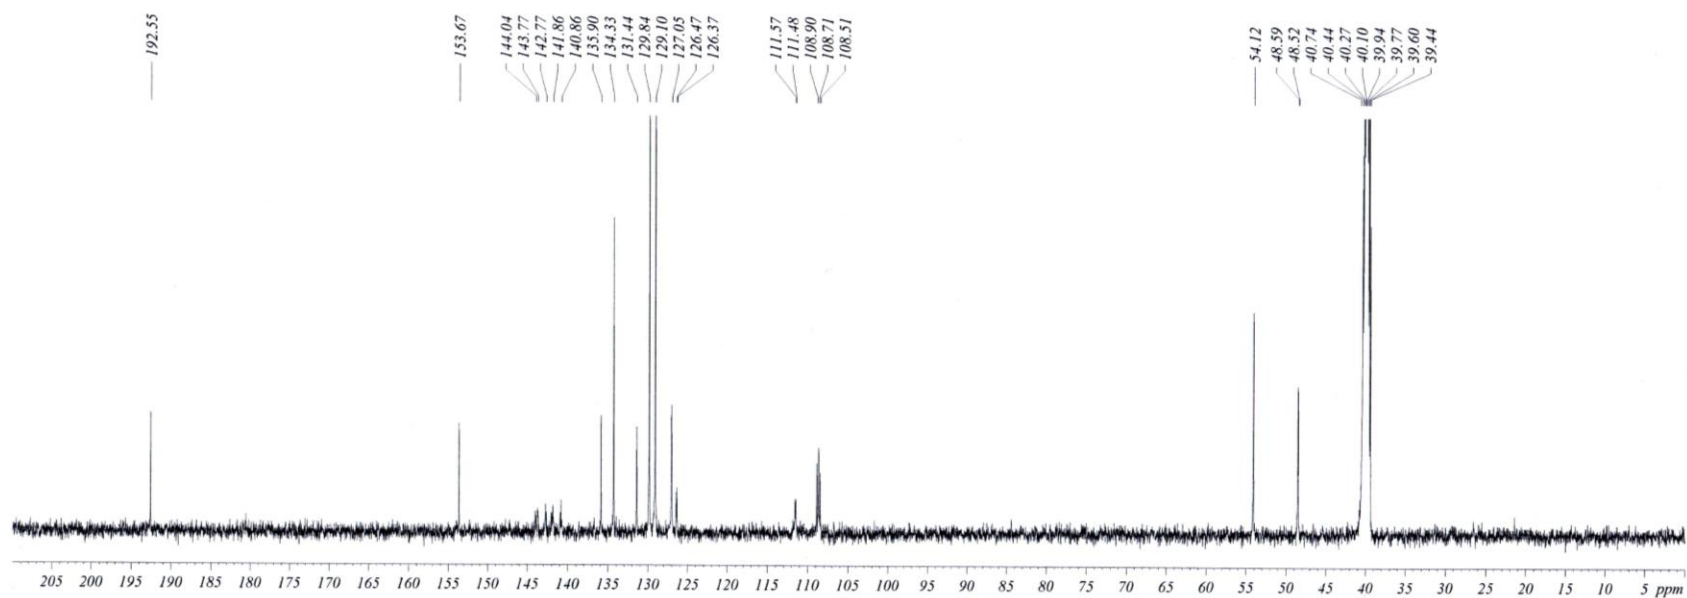

Figure S70.  $^{13}\text{C}$  NMR (125 MHz,  $\text{DMSO-}d_6$ ) spectra of compound **3cd**

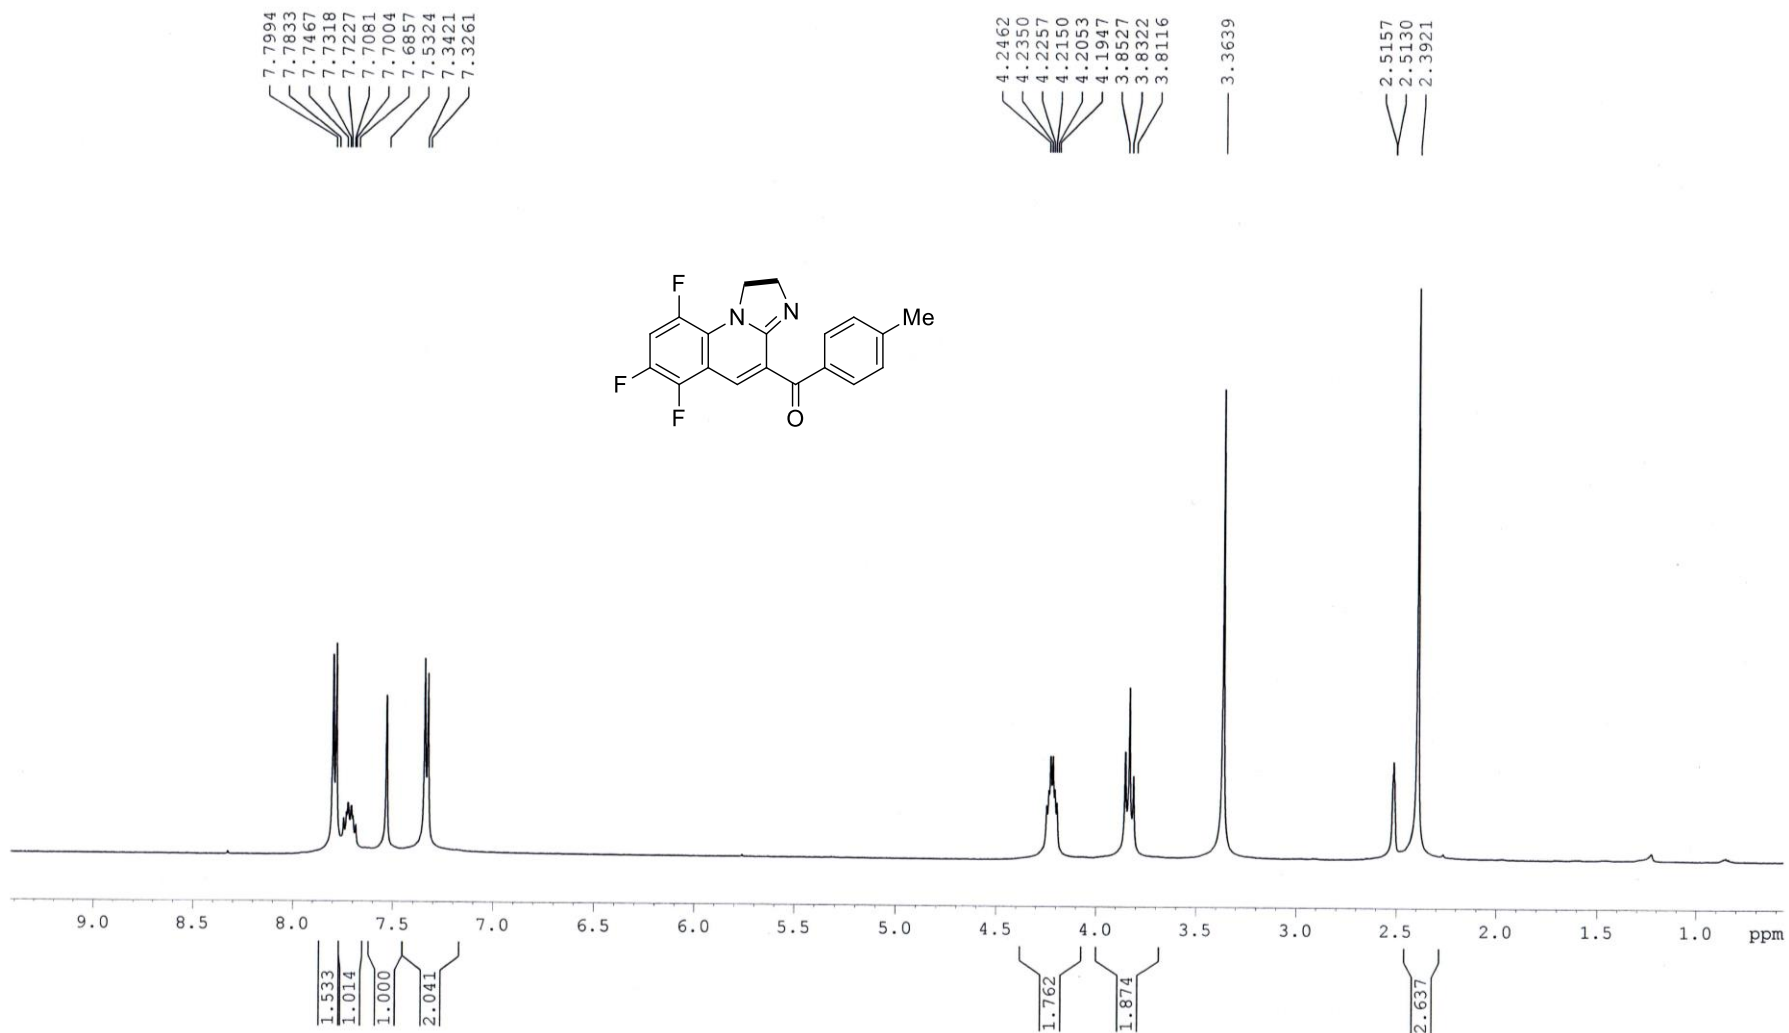

**Figure S71.** <sup>1</sup>H NMR (500 MHz, DMSO-*d*<sub>6</sub>) spectra of compound **3ce**

DEPT135

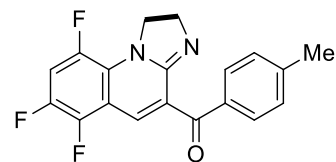

YUNNAN UNIVERSITY AV. DRX 50G  
chenliang CL-016 in DMSO  
16032301

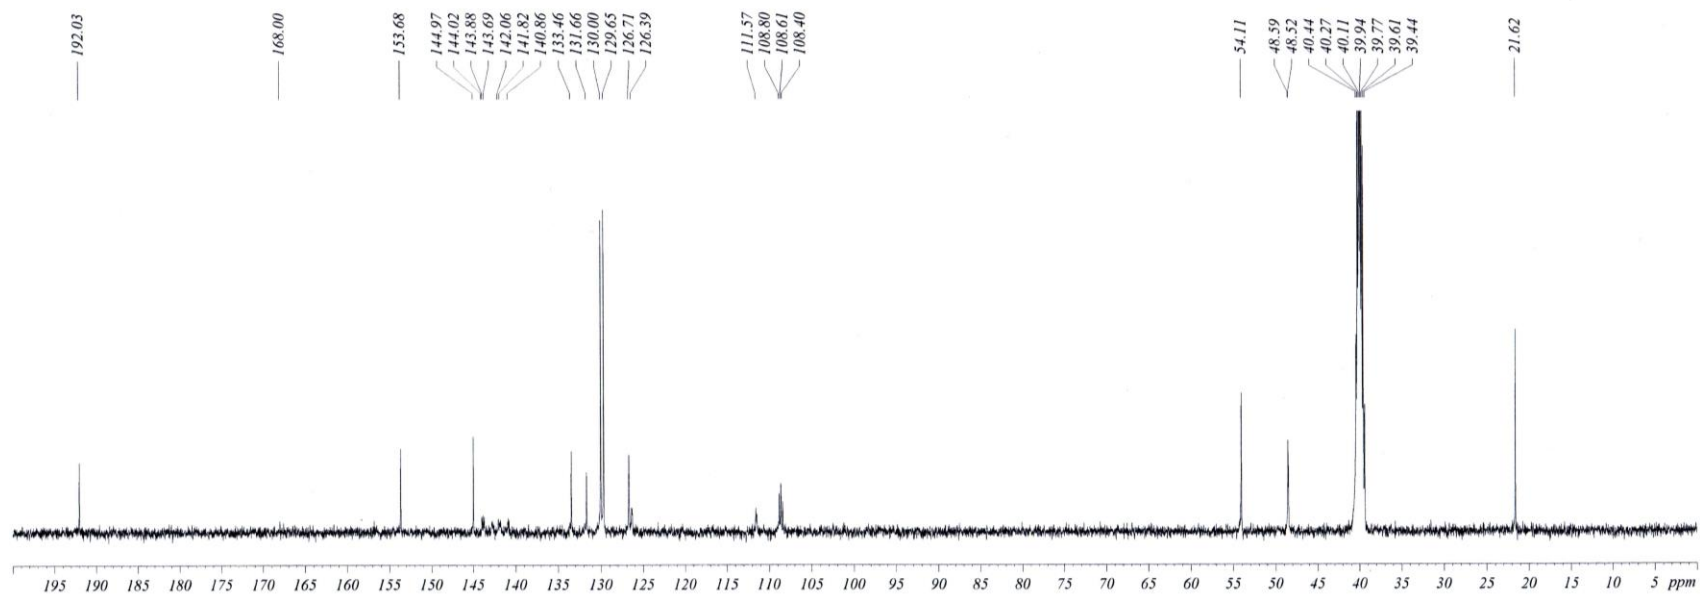

Figure S72.  $^{13}\text{C}$  NMR (125MHz, DMSO- $d_6$ ) spectra of compound **3ce**

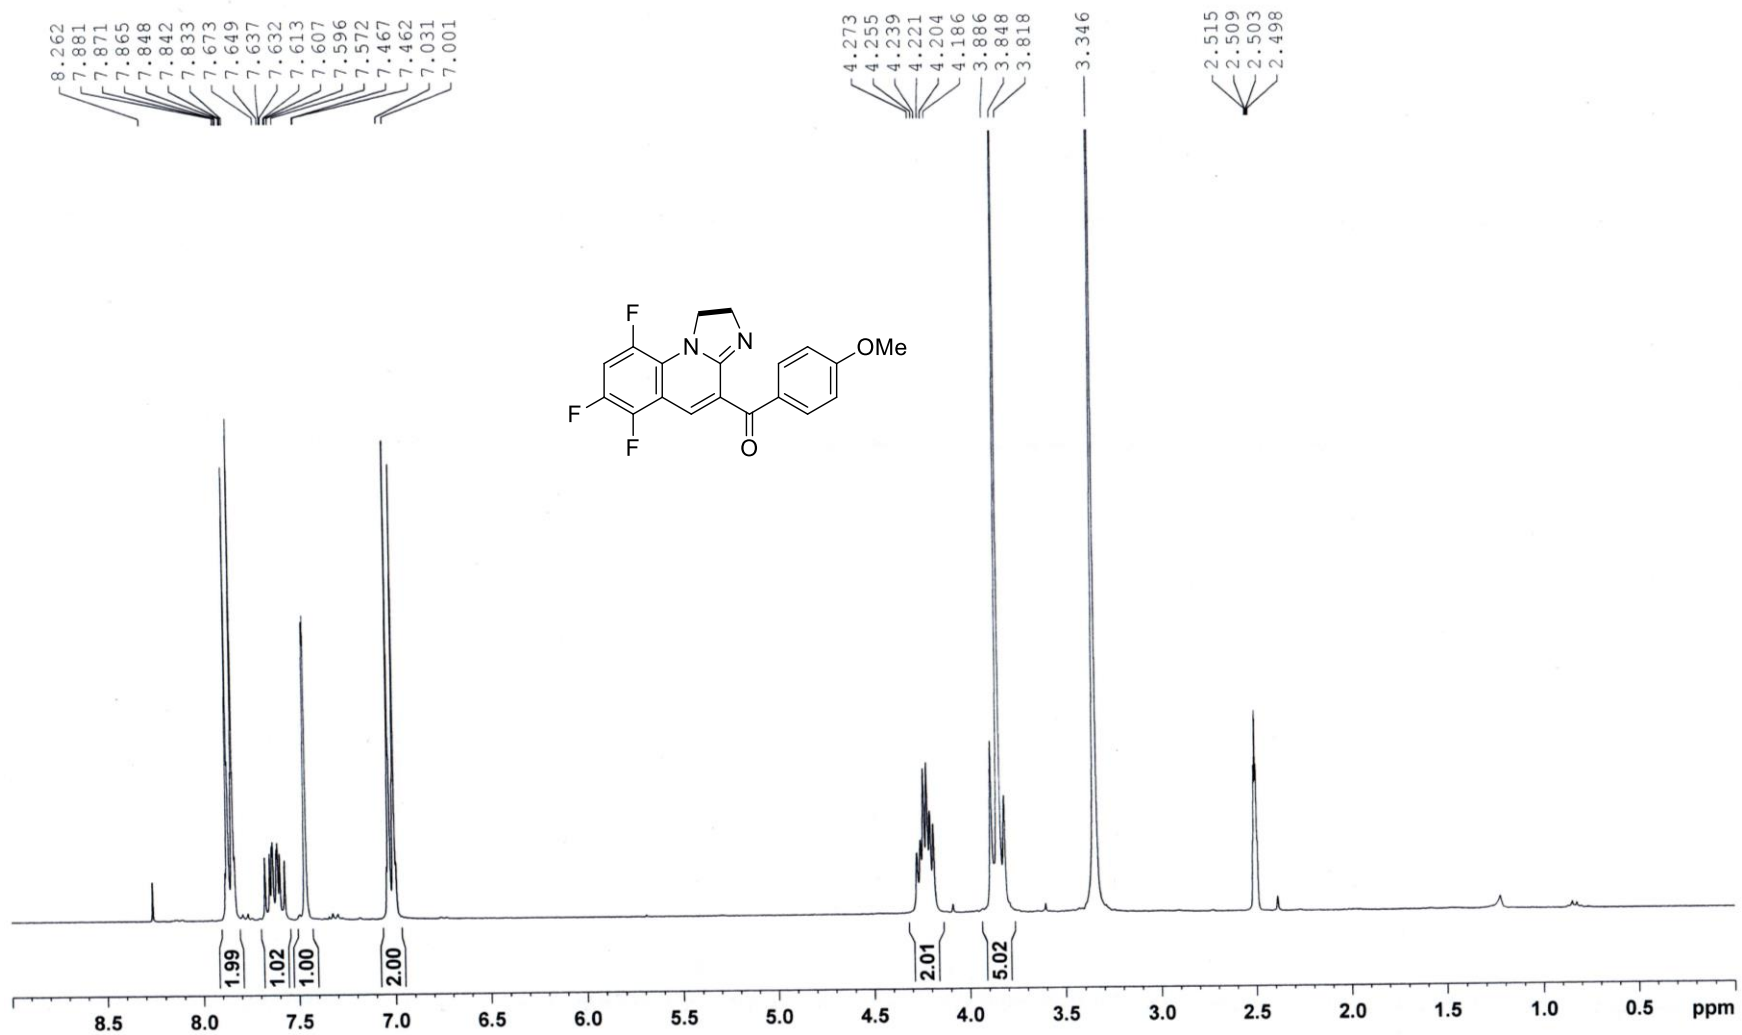

**Figure S73.** <sup>1</sup>H NMR (300 MHz, DMSO-*d*<sub>6</sub>) spectra of compound **3cf**



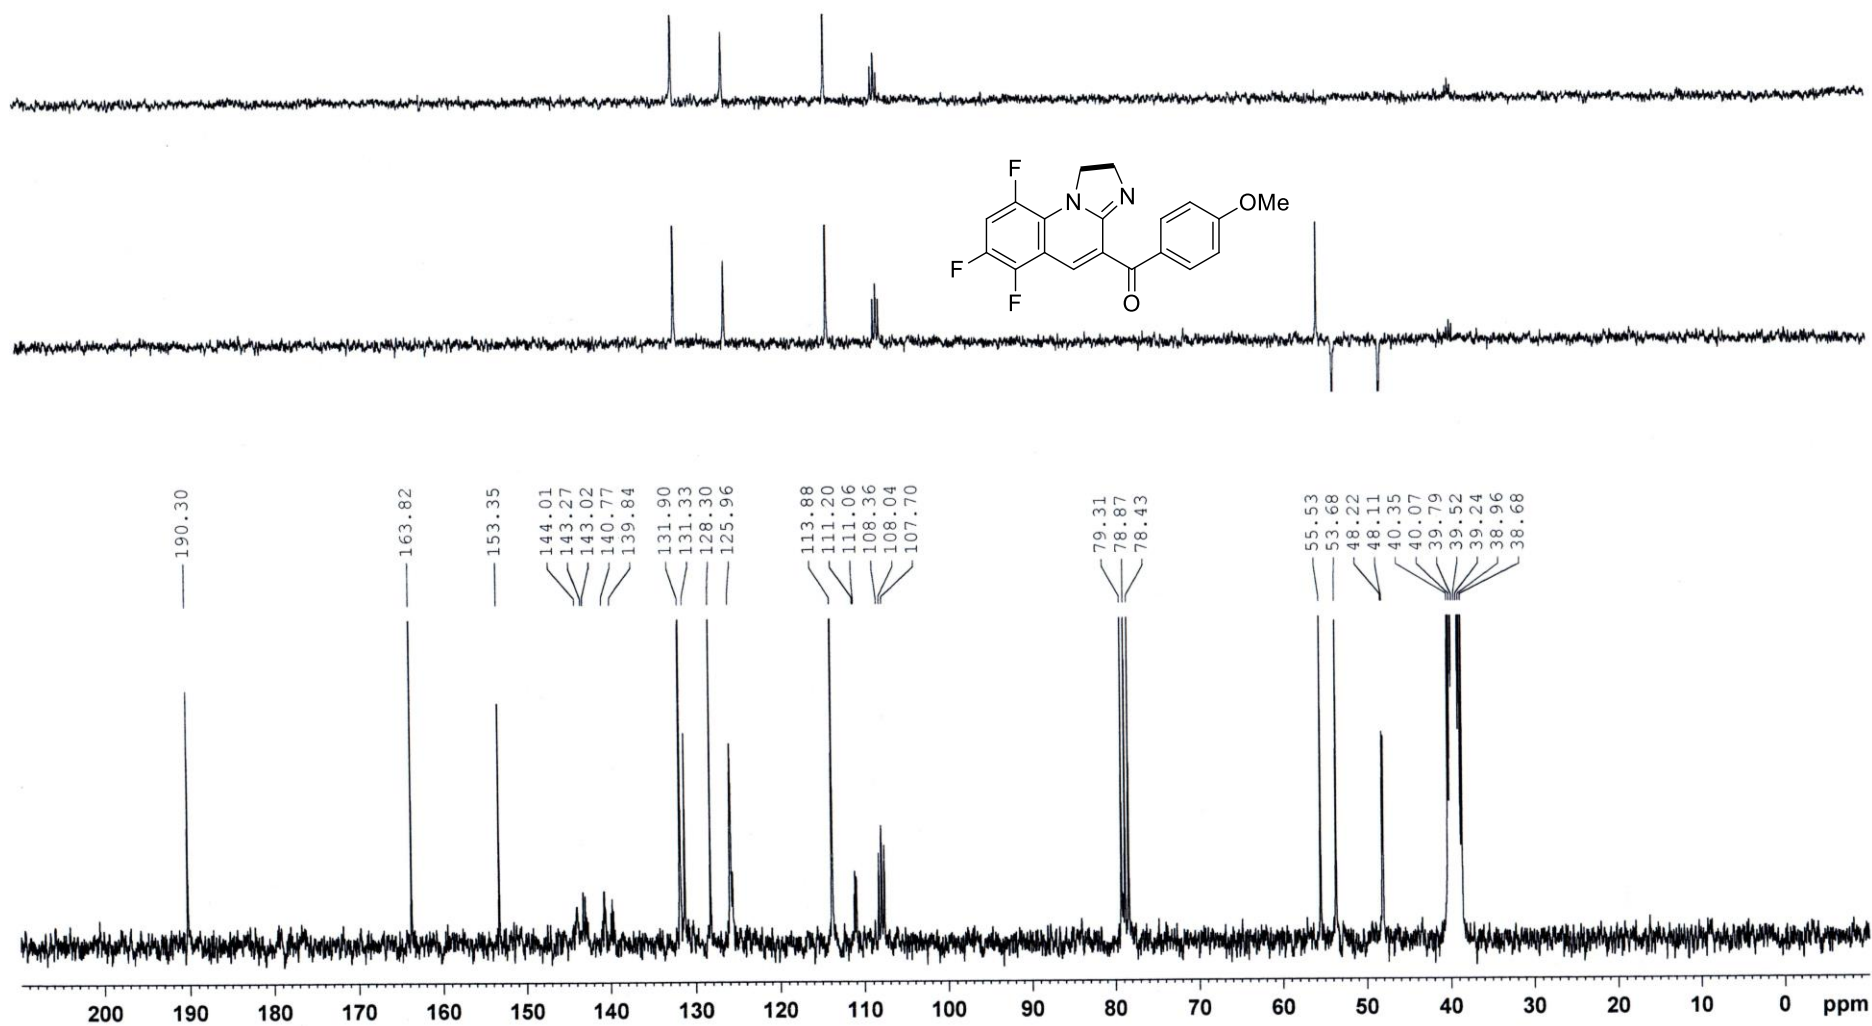

Figure S74. <sup>13</sup>C NMR (75 MHz, DMSO-*d*<sub>6</sub>) spectra of compound 3cf

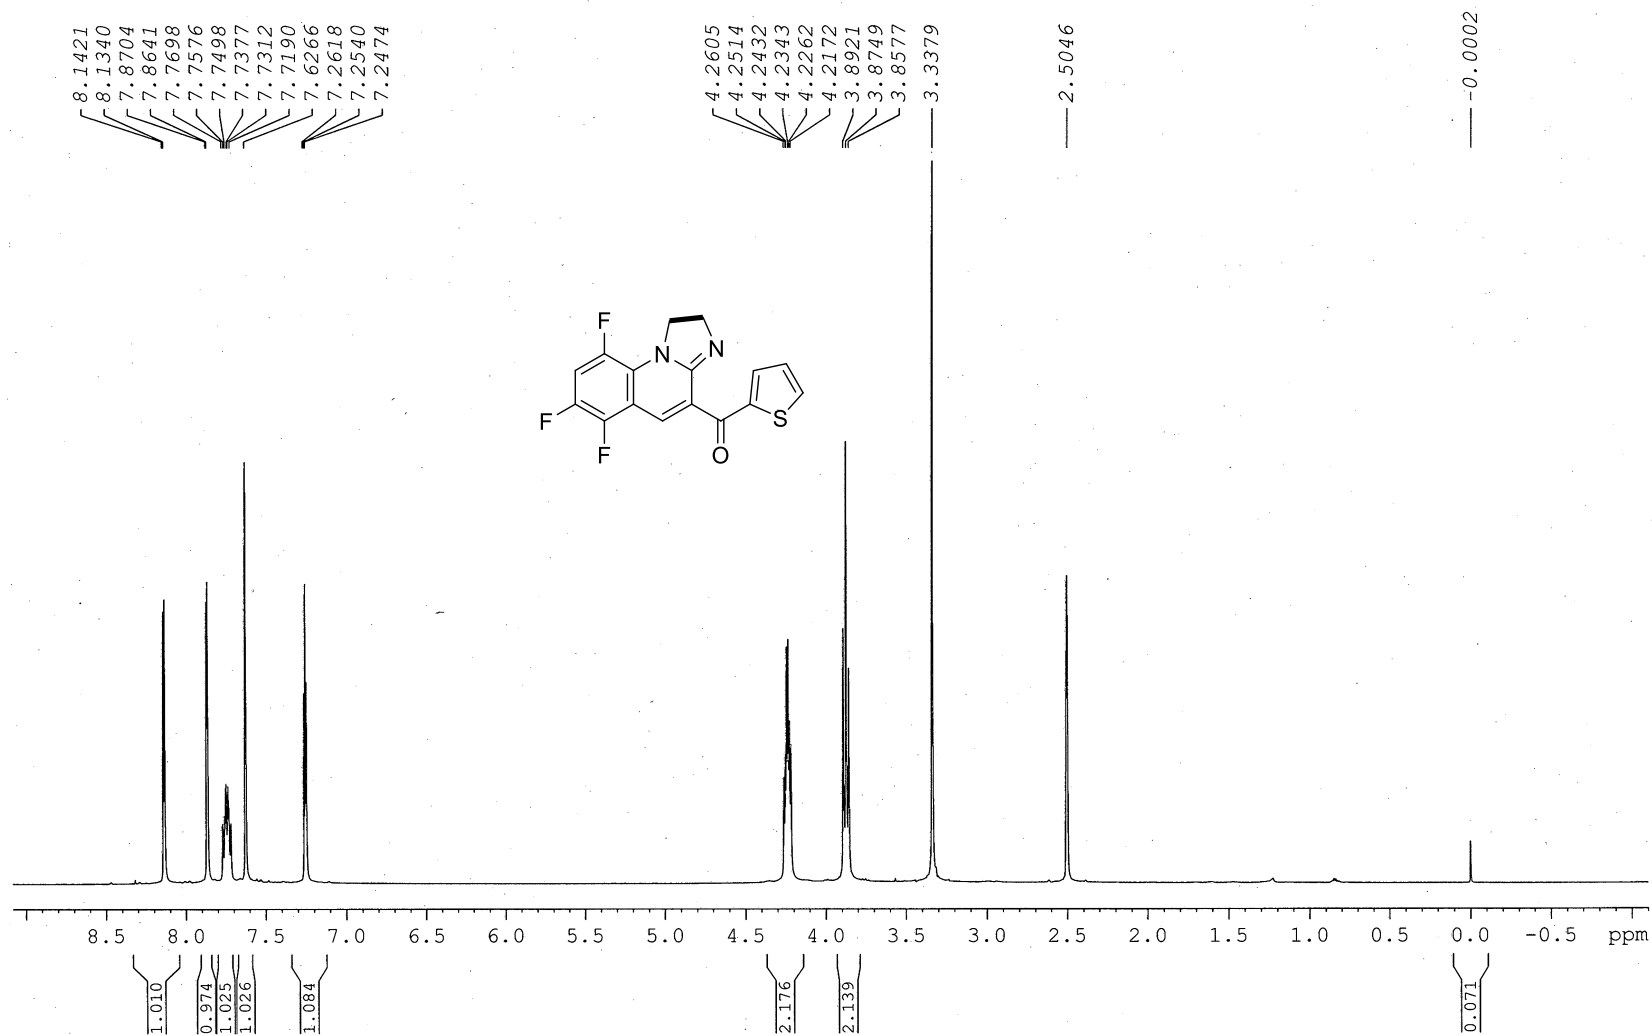

Figure S75. <sup>1</sup>H NMR (600 MHz, DMSO-*d*<sub>6</sub>) spectra of compound 3cg

DEPT135

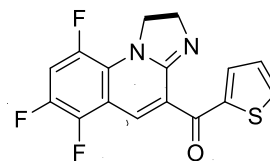

YUNNAN UNIVERSITY ASCEND III 600  
CL-30 in DMSO  
2016042901

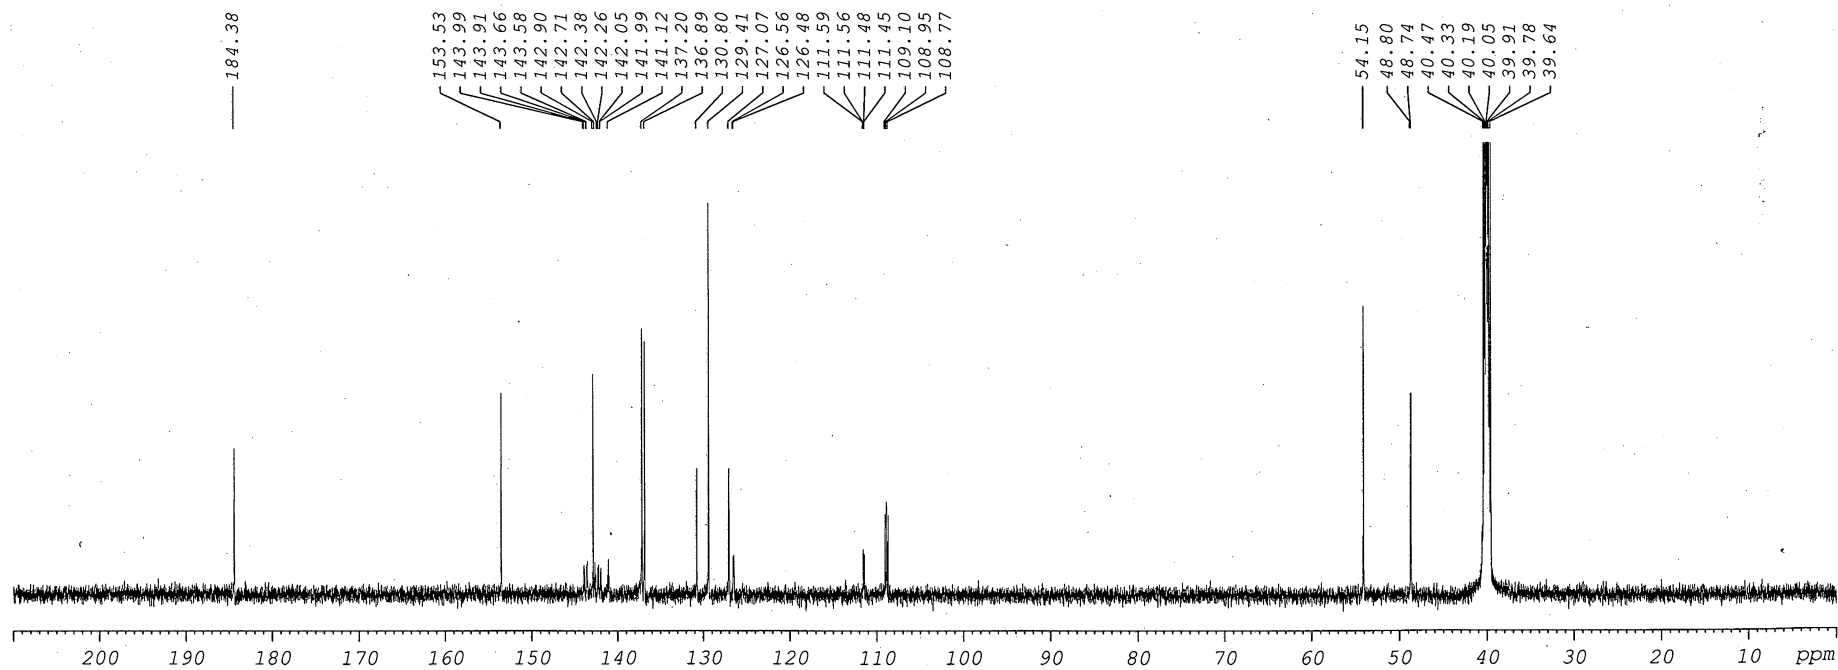

Figure S76.  $^{13}\text{C}$  NMR (150 MHz,  $\text{DMSO-}d_6$ ) spectra of compound **3cg**

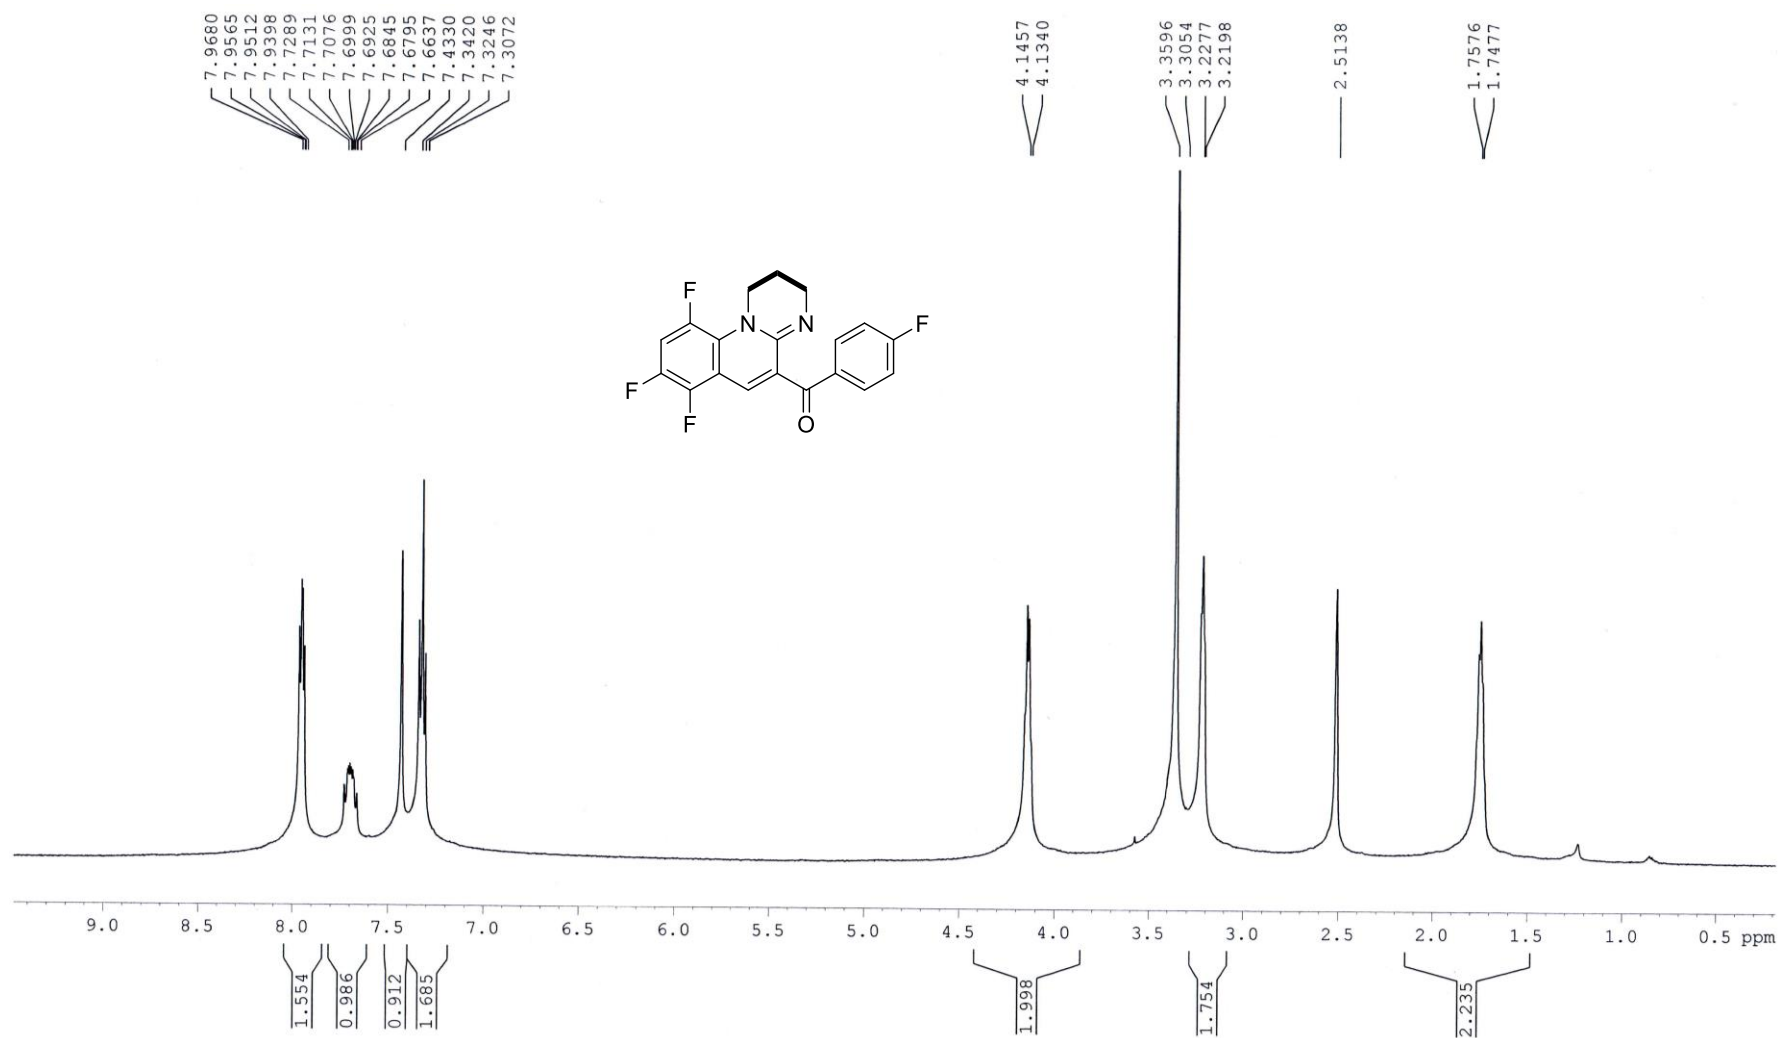

**Figure S77.** <sup>1</sup>H NMR (500 MHz, DMSO-*d*<sub>6</sub>) spectra of compound 3ch

DEPT135

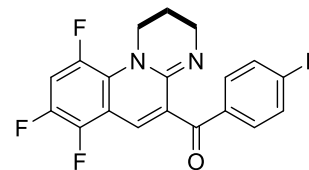

YUNNAN UNIVERSITY AV. DRX 506  
chenliang CL-015 in DMSO  
16031703

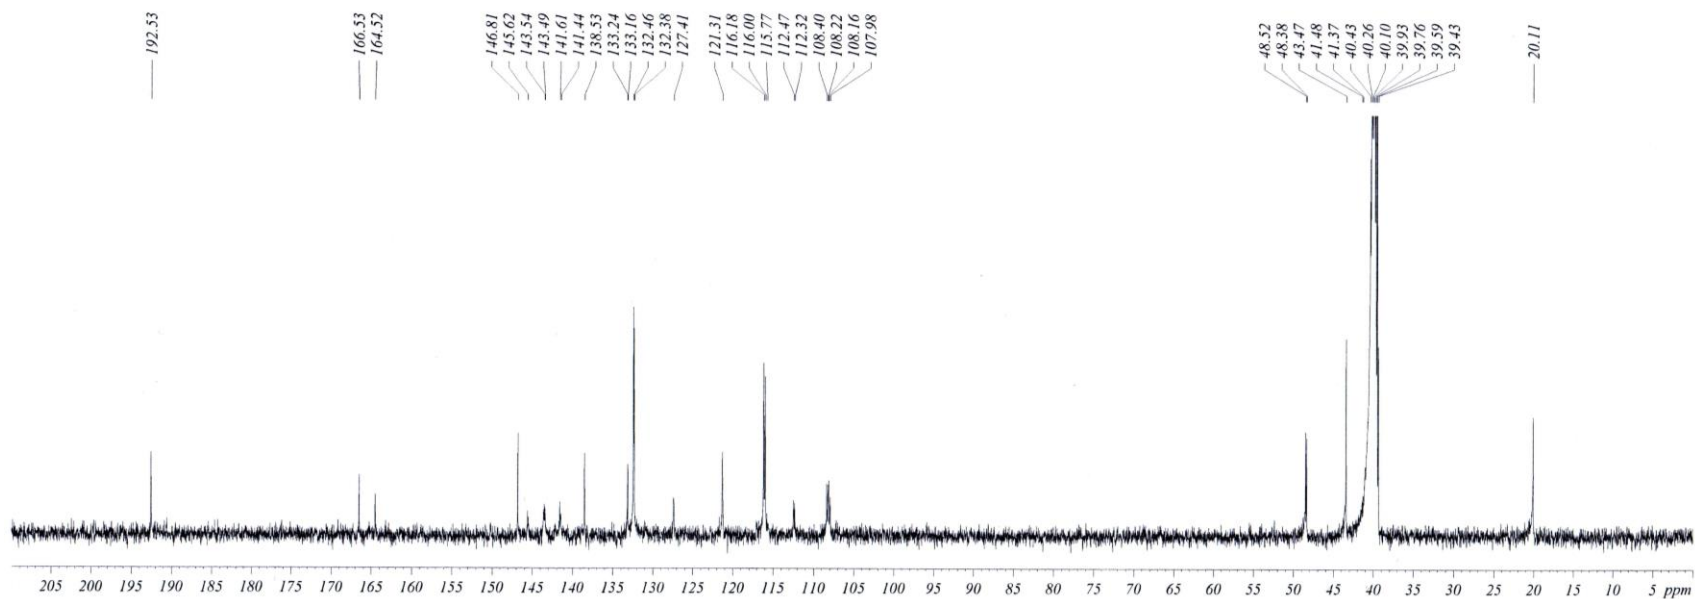

Figure S78.  $^{13}\text{C}$  NMR (125 MHz,  $\text{DMSO-}d_6$ ) spectra of compound 3ch

YUNNAN UNIVER. AV. DRX500  
chenliang CL-015 in DMSO  
19F decoupling 16031703

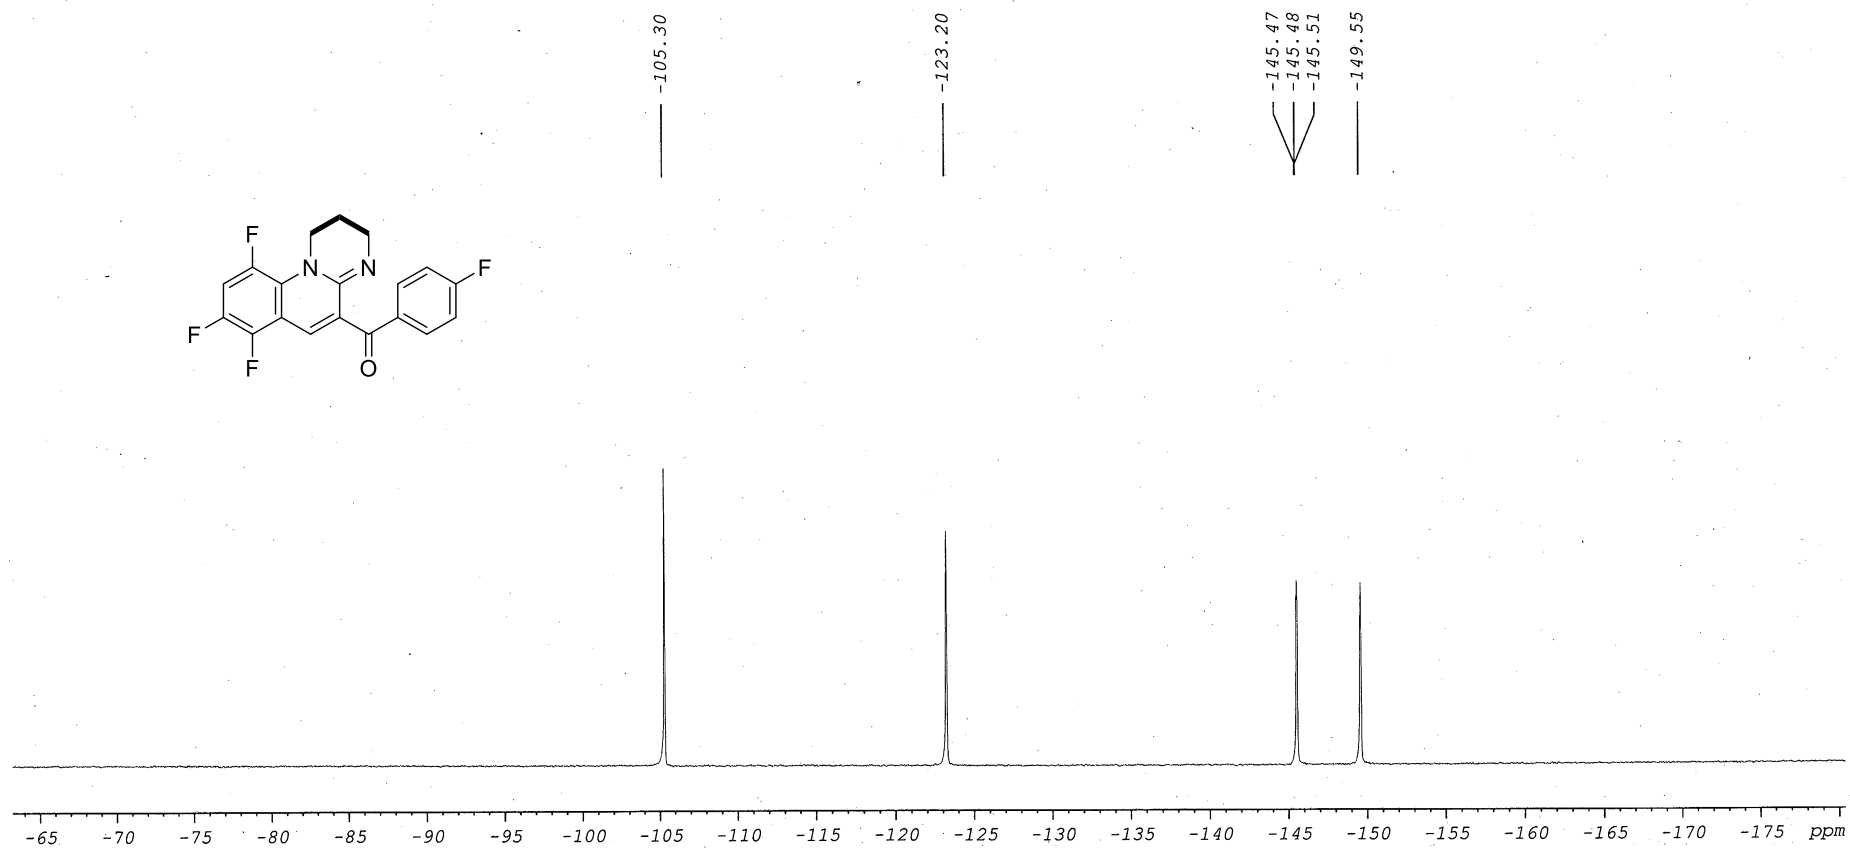

**Figure S79.**  $^{19}\text{F}$  NMR (470 MHz,  $\text{DMSO-}d_6$ ) spectra of compound **3ch**

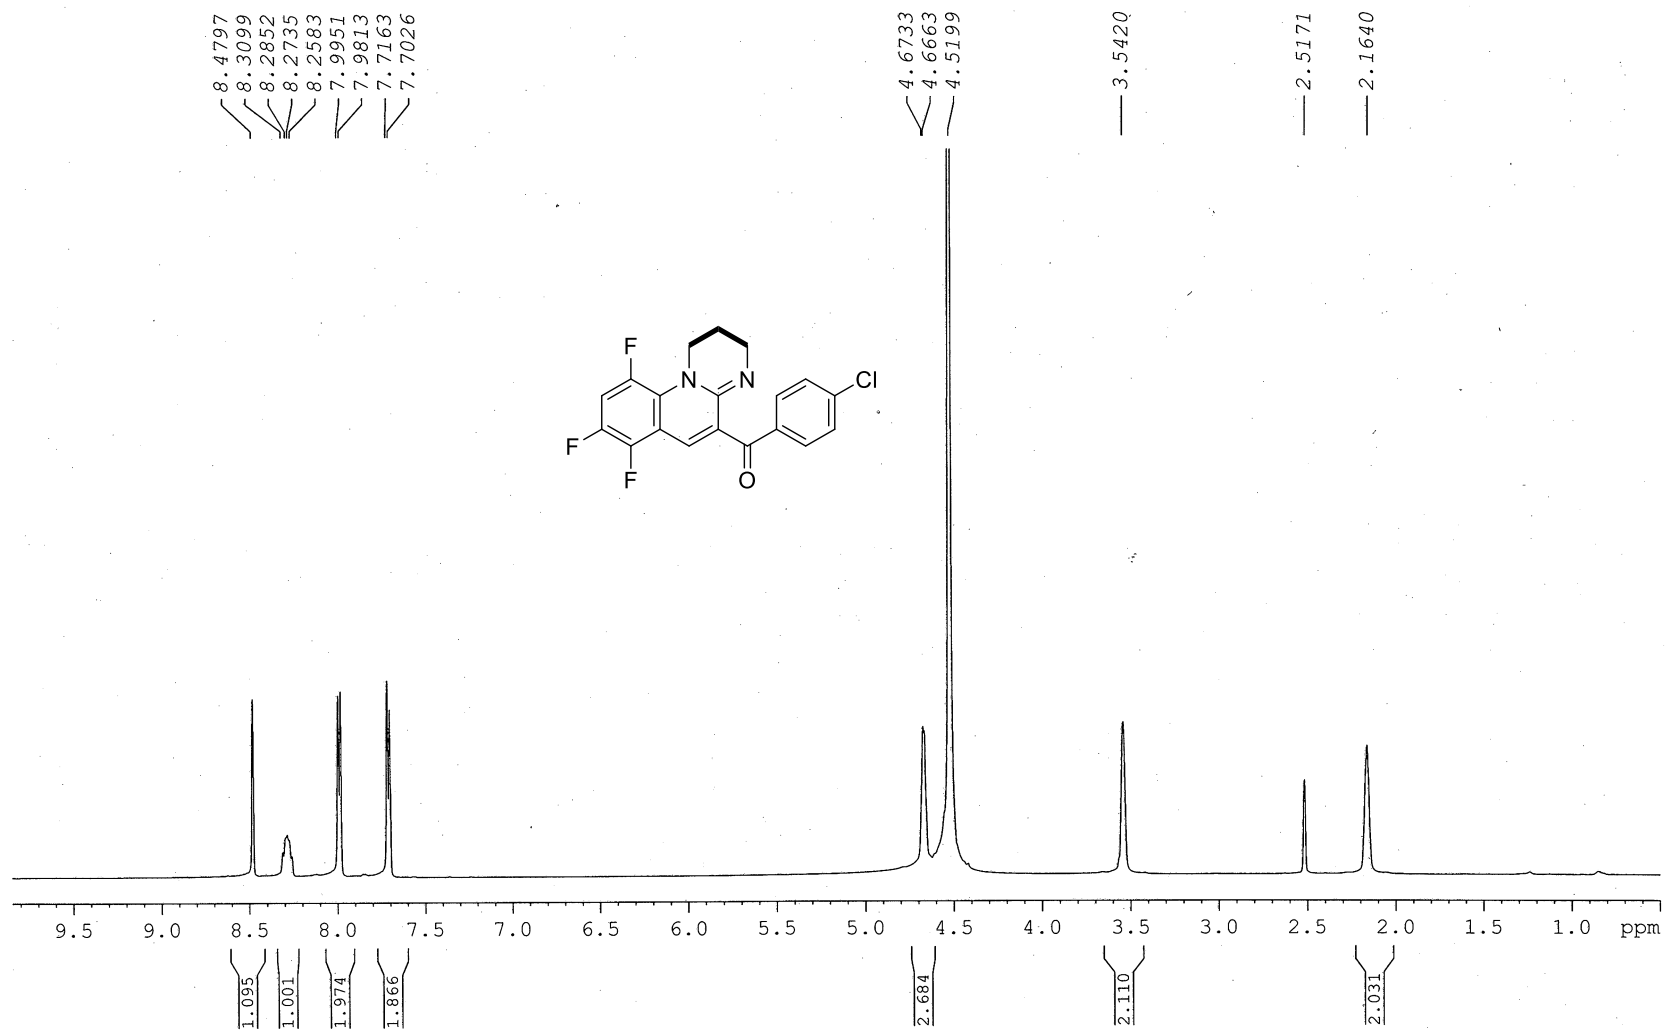

**Figure S80.**  $^1\text{H}$  NMR (600 MHz,  $\text{DMSO-}d_6 + \text{HClO}_4$ ) spectra of compound **3ci**

DEPT135

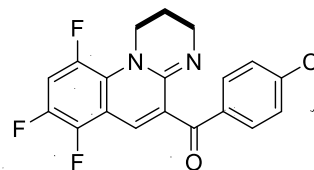

YUNNAN UNIVERSITY ASCEND III 600  
CL-33 in DMSO  
2016042905

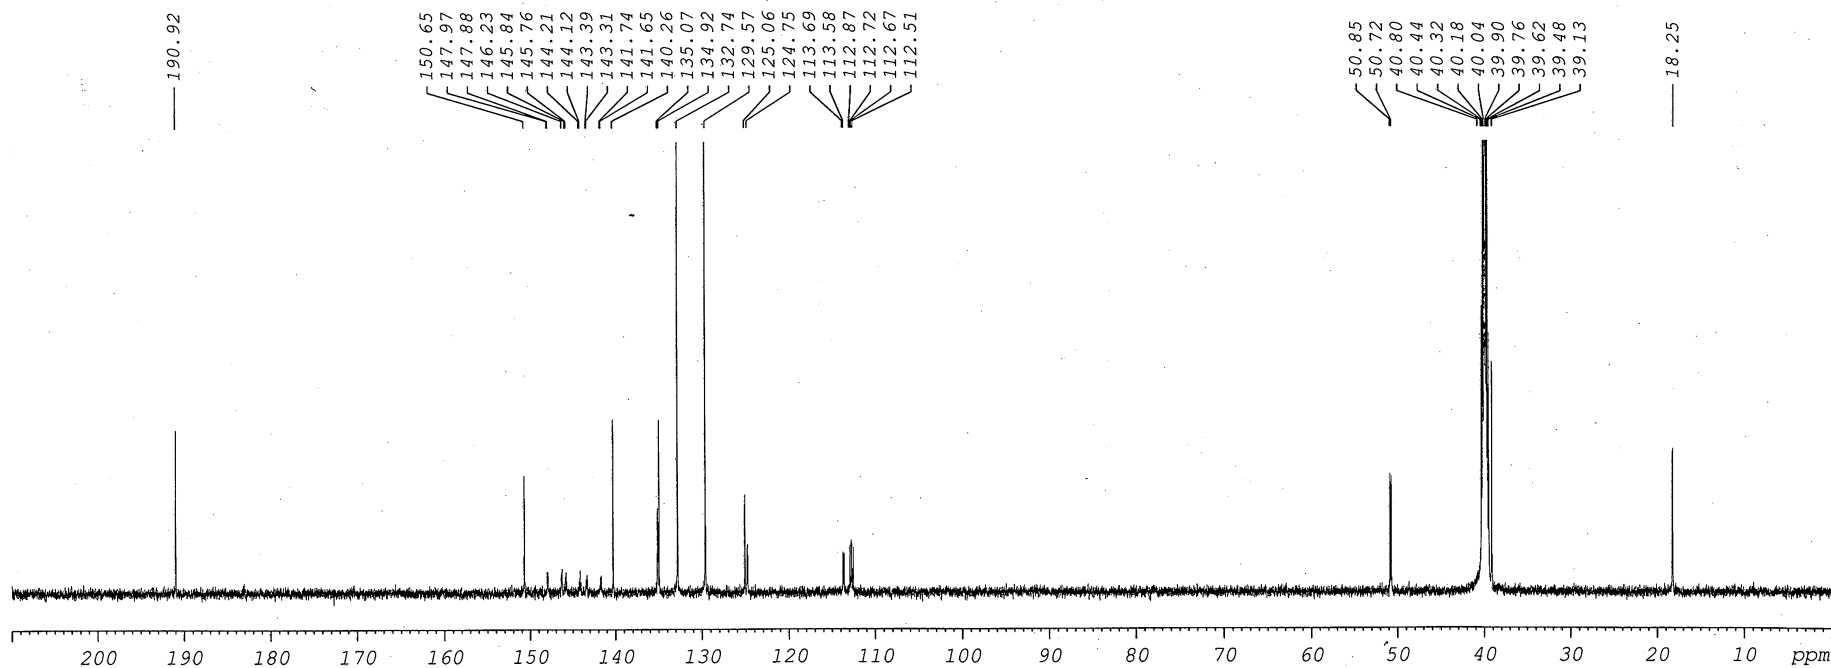

Figure S81.  $^{13}\text{C}$  NMR (150 MHz,  $\text{DMSO-}d_6 + \text{HClO}_4$ ) spectra of compound **3ci**



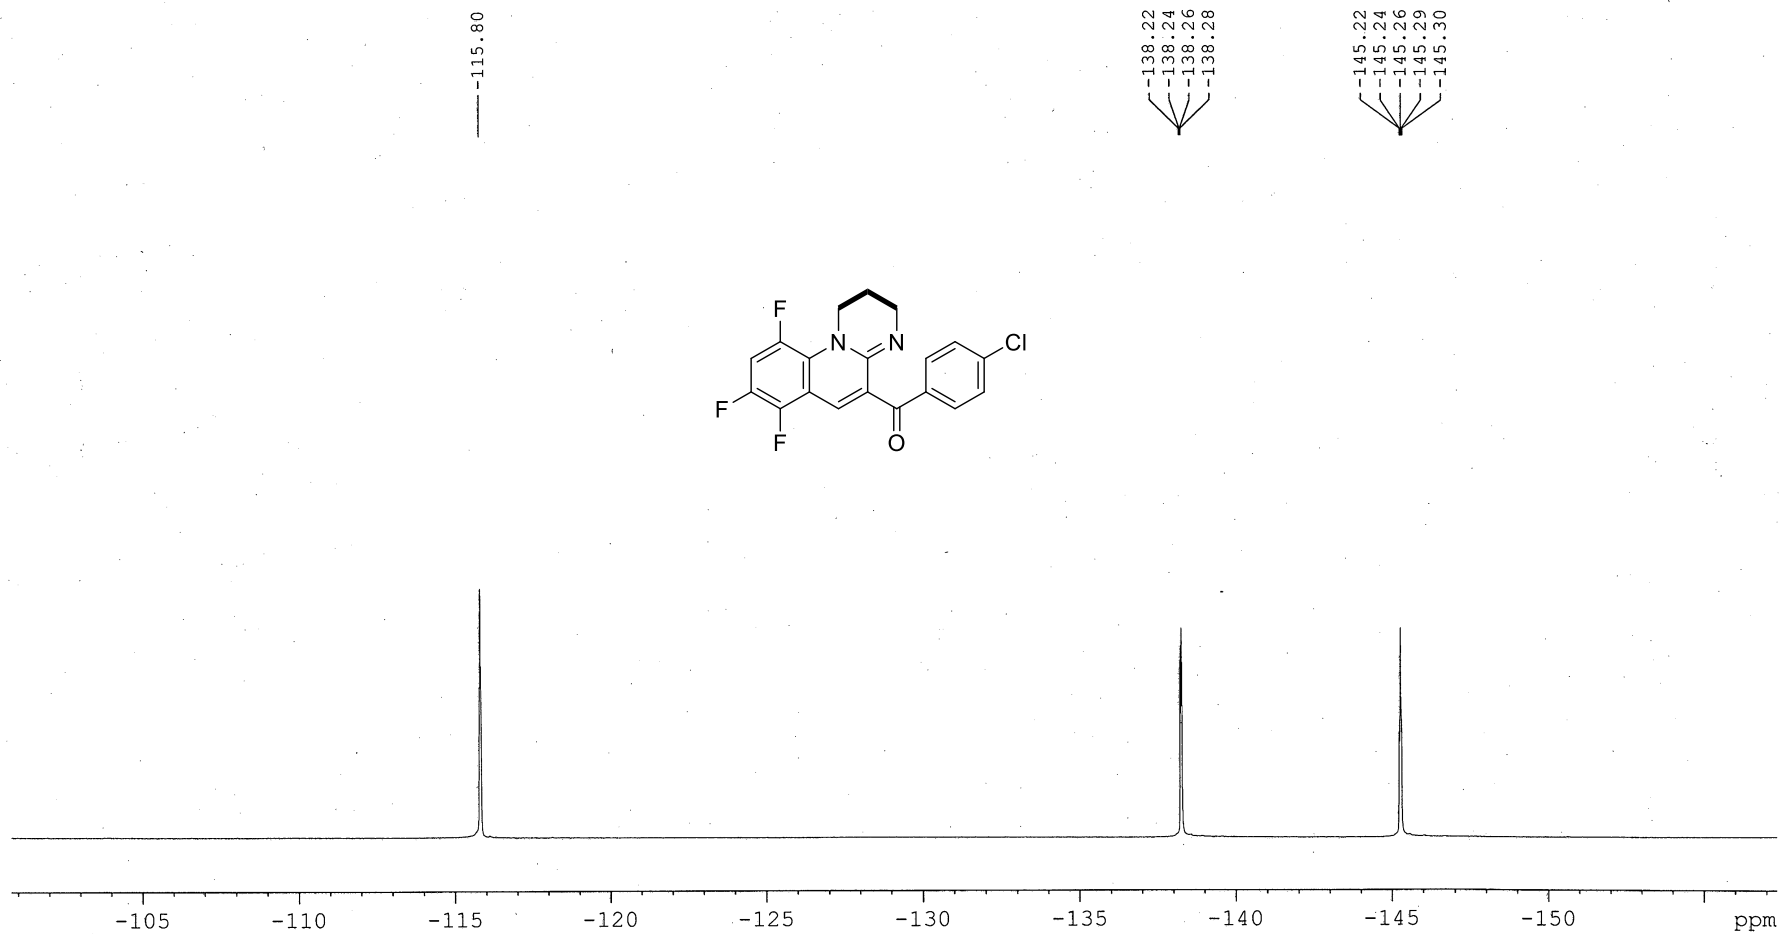

**Figure S82.**  $^{19}\text{F}$  NMR (565 MHz,  $\text{DMSO-}d_6 + \text{HClO}_4$ ) spectra of compound **3ci**

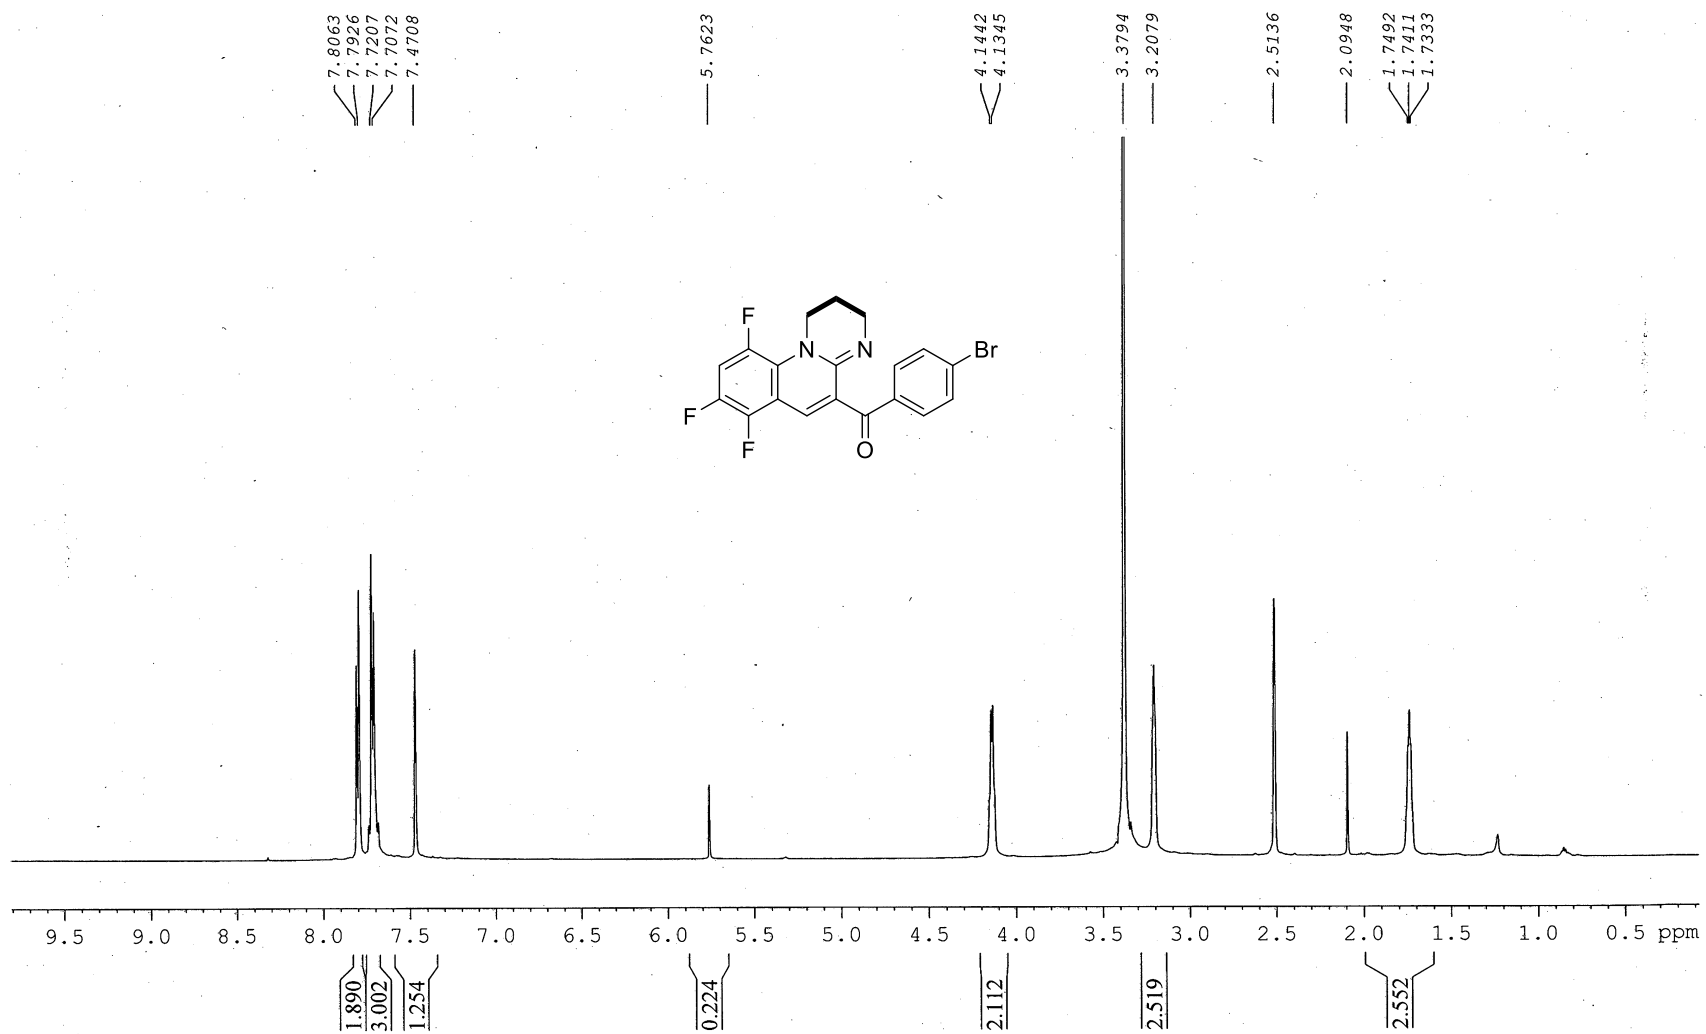

**Figure S83.**  $^1\text{H}$  NMR (600 MHz,  $\text{DMSO-}d_6 + \text{HClO}_4$ ) spectra of compound 3cj

DEPT135

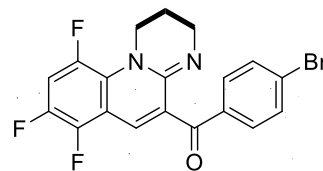

YUNNAN UNIVERSITY ASCEND III 600  
CL-23 in DMSO  
20162803

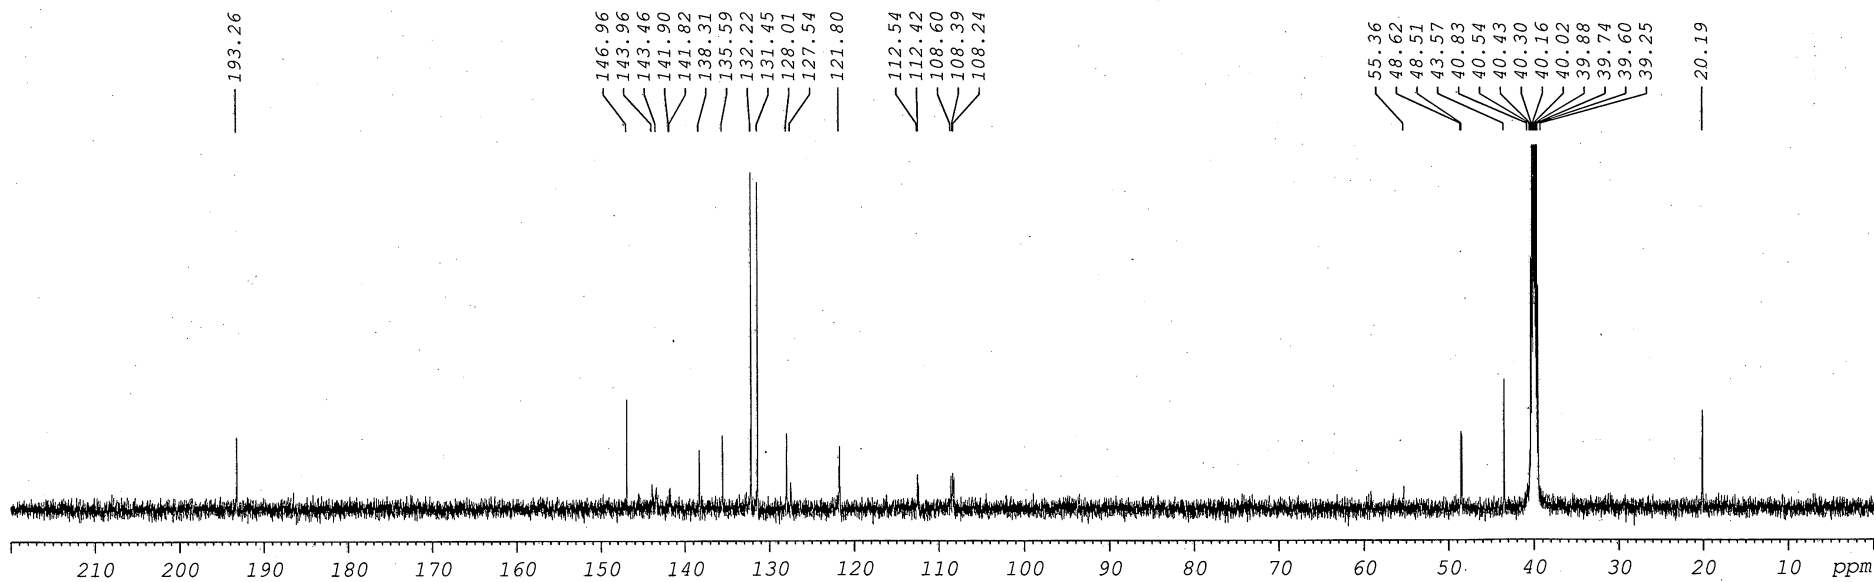

Figure S84.  $^{13}\text{C}$  NMR (150 MHz,  $\text{DMSO-}d_6 + \text{HClO}_4$ ) spectra of compound **3cj**

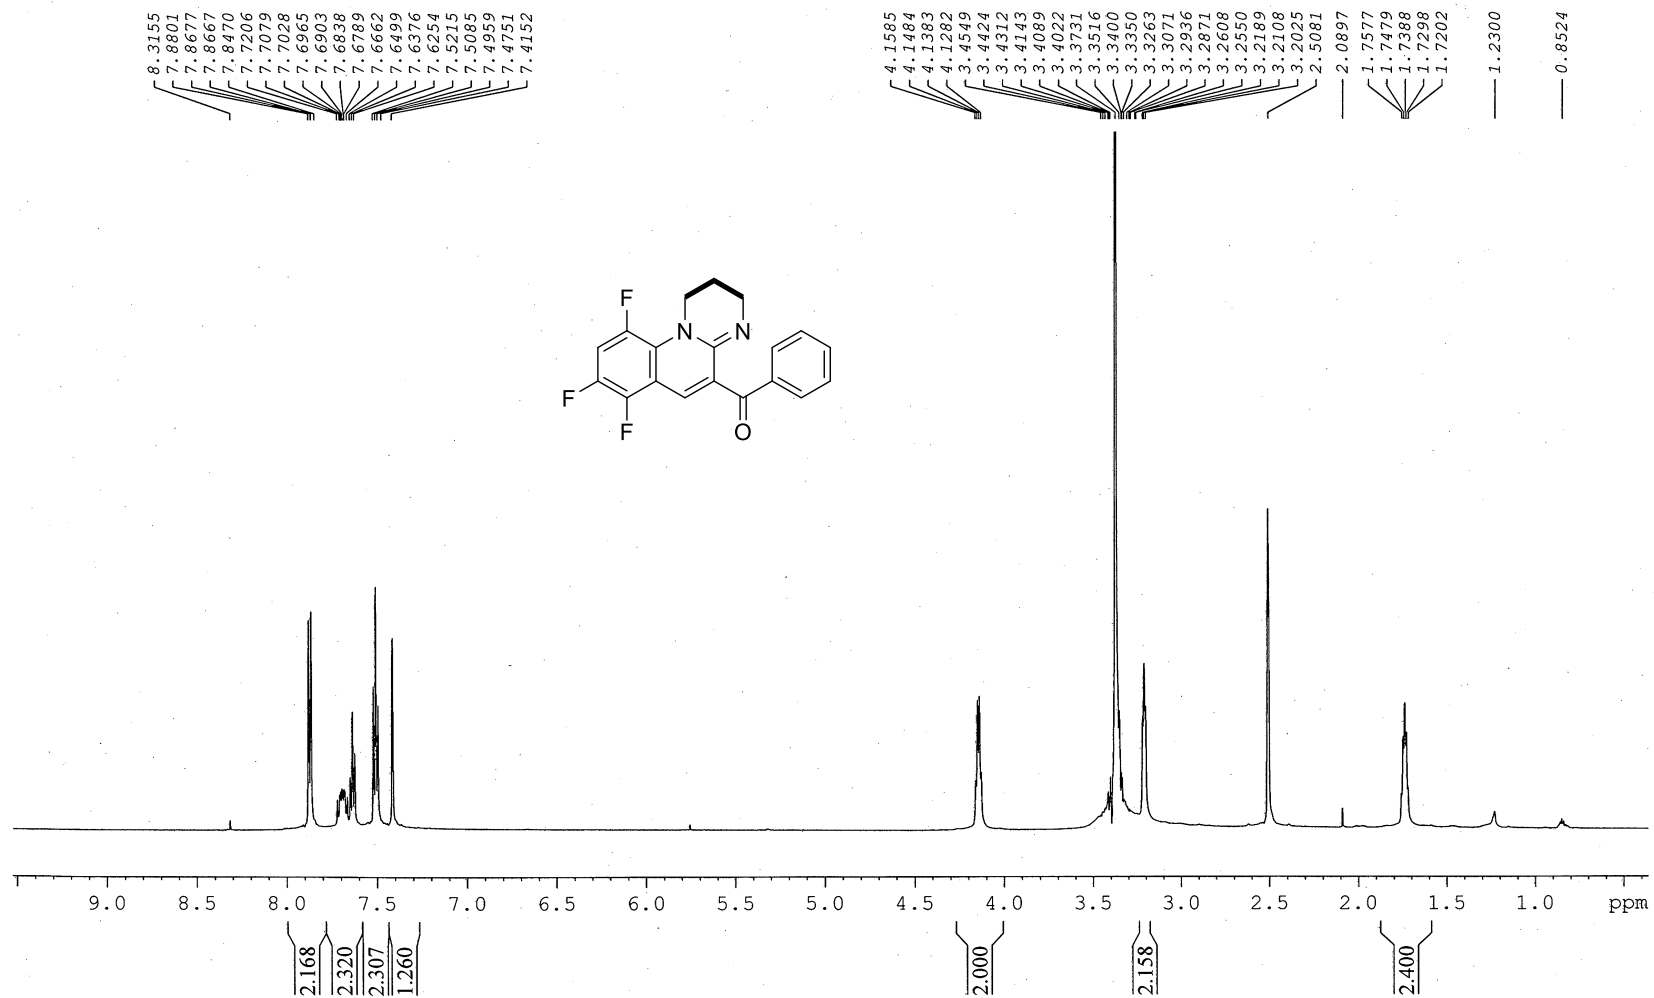

Figure S85. <sup>1</sup>H NMR (600 MHz, DMSO-*d*<sub>6</sub>) spectra of compound 3ck

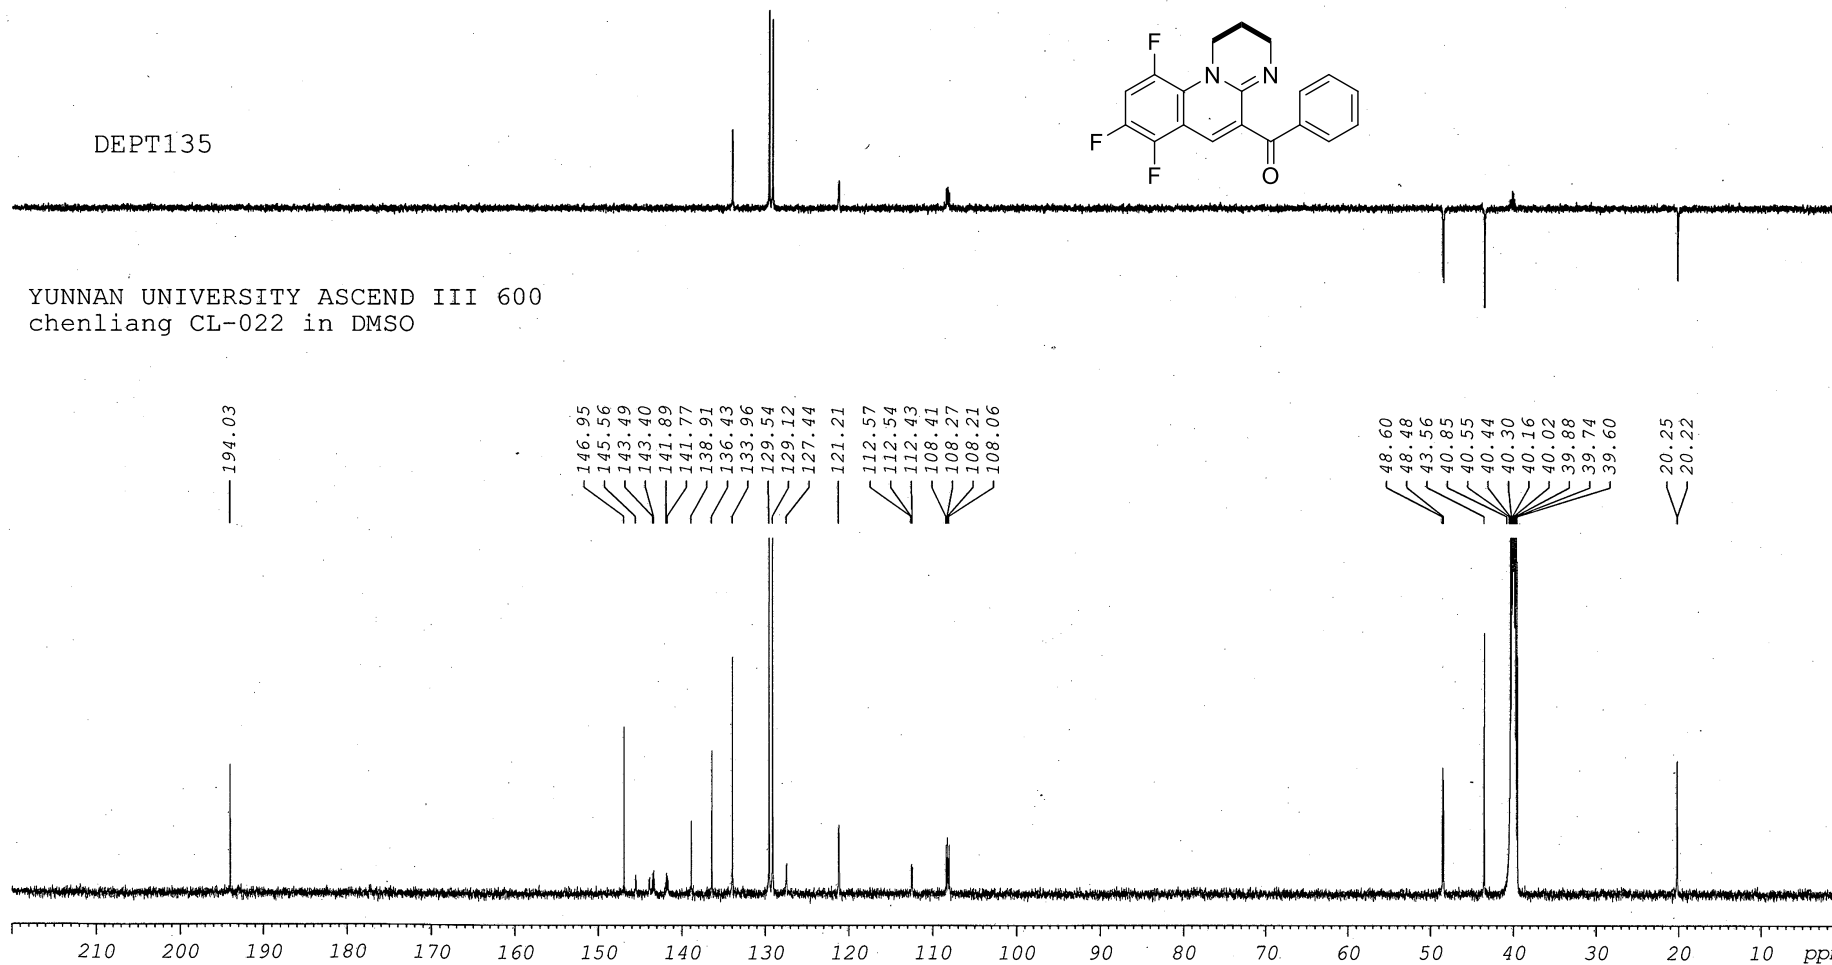

Figure S86.  $^{13}\text{C}$  NMR (150 MHz,  $\text{DMSO-}d_6$ ) spectra of compound 3ck

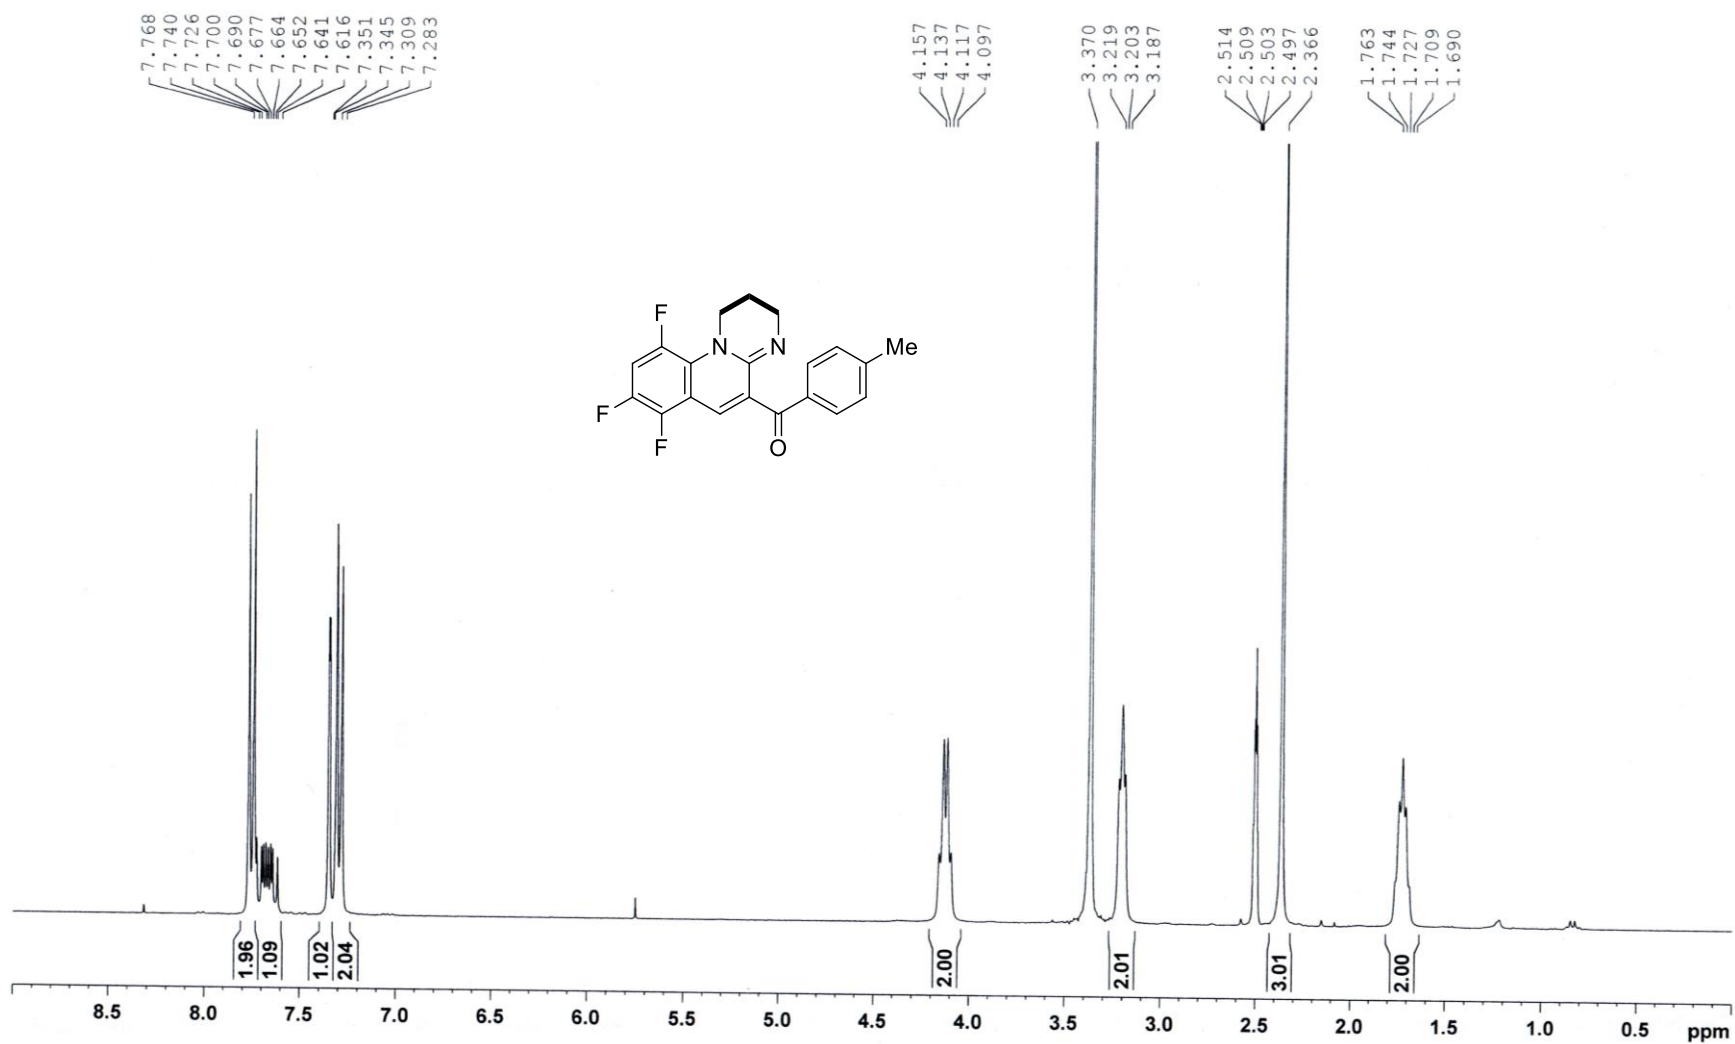

Figure S87. <sup>1</sup>H NMR (300 MHz, DMSO-*d*<sub>6</sub>) spectra of compound **3cl**

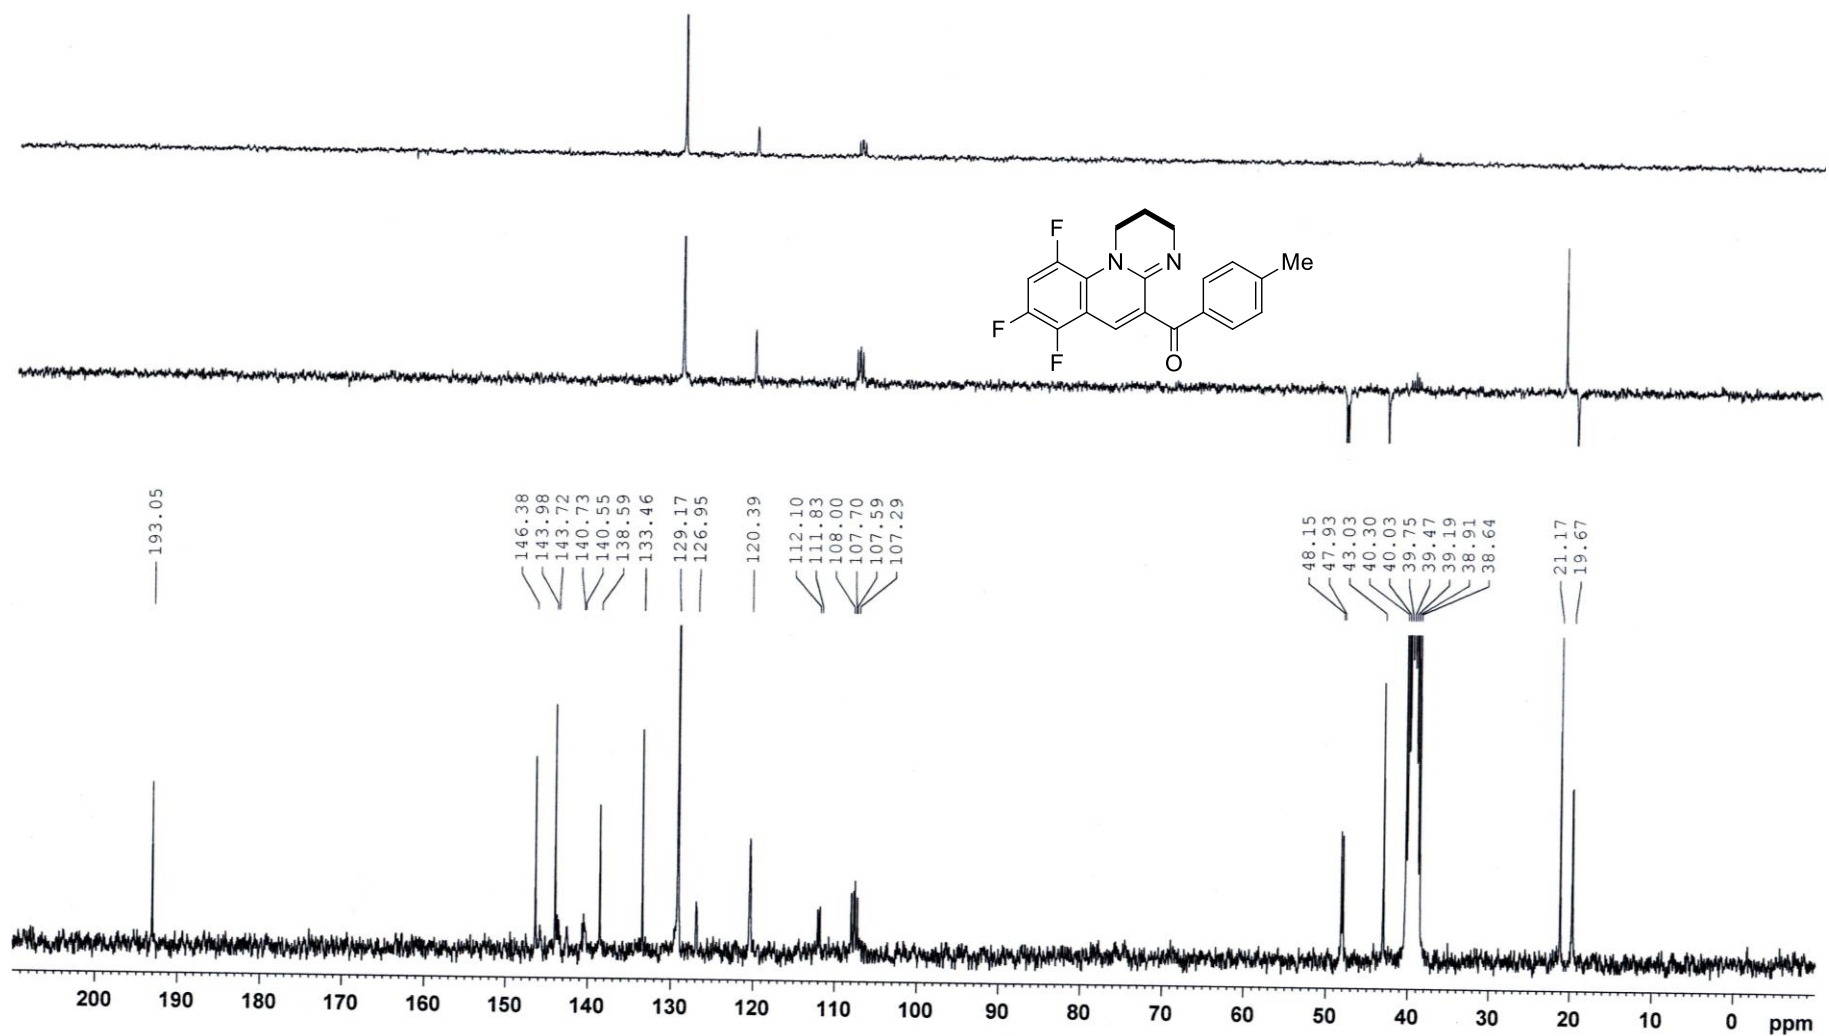

Figure S88.  $^{13}\text{C}$  NMR (75 MHz,  $\text{DMSO-}d_6$ ) spectra of compound 3cl

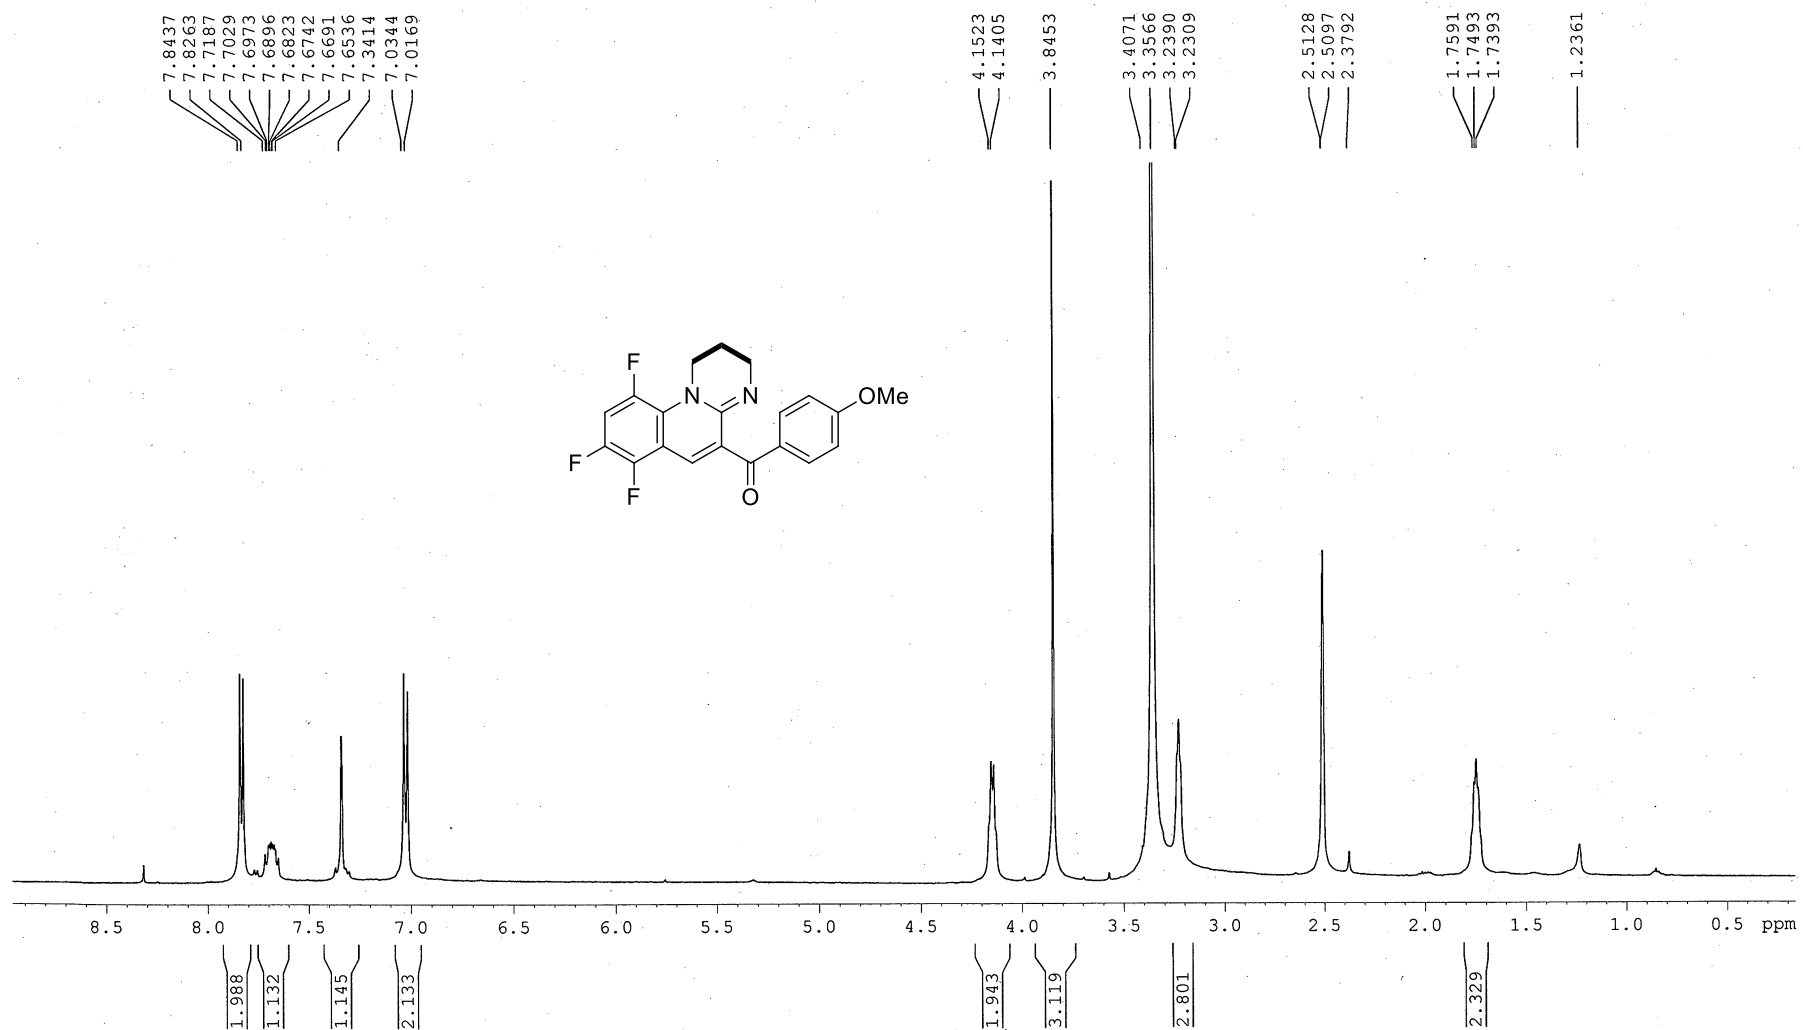

**Figure S89.**  $^1\text{H}$  NMR (500 MHz,  $\text{DMSO-}d_6$ ) spectra of compound **3cm**



DEPT135

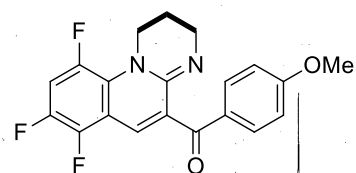

YUNNAN UNIVERSITY AV. DRX 500  
chenliang CL-020 in DMSO  
1603230502

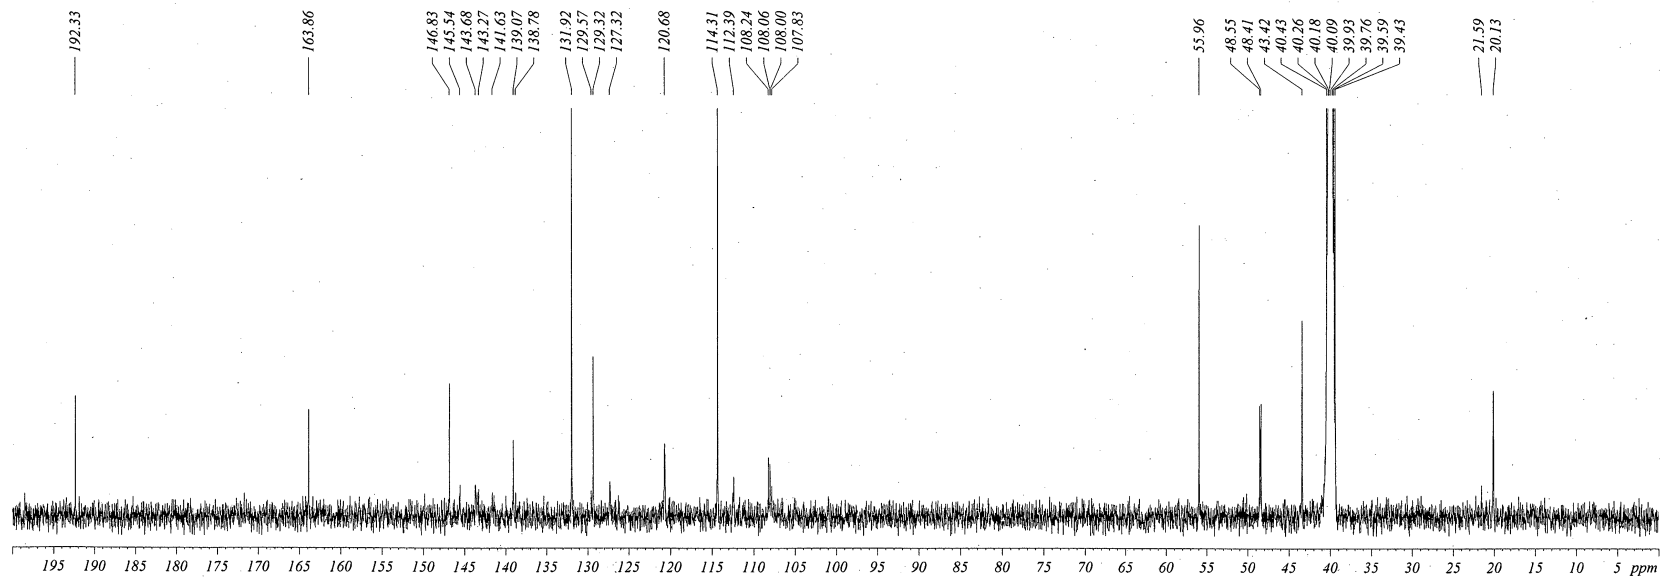

Figure S90.  $^{13}\text{C}$  NMR (125 MHz,  $\text{DMSO-}d_6$ ) spectra of compound 3cm

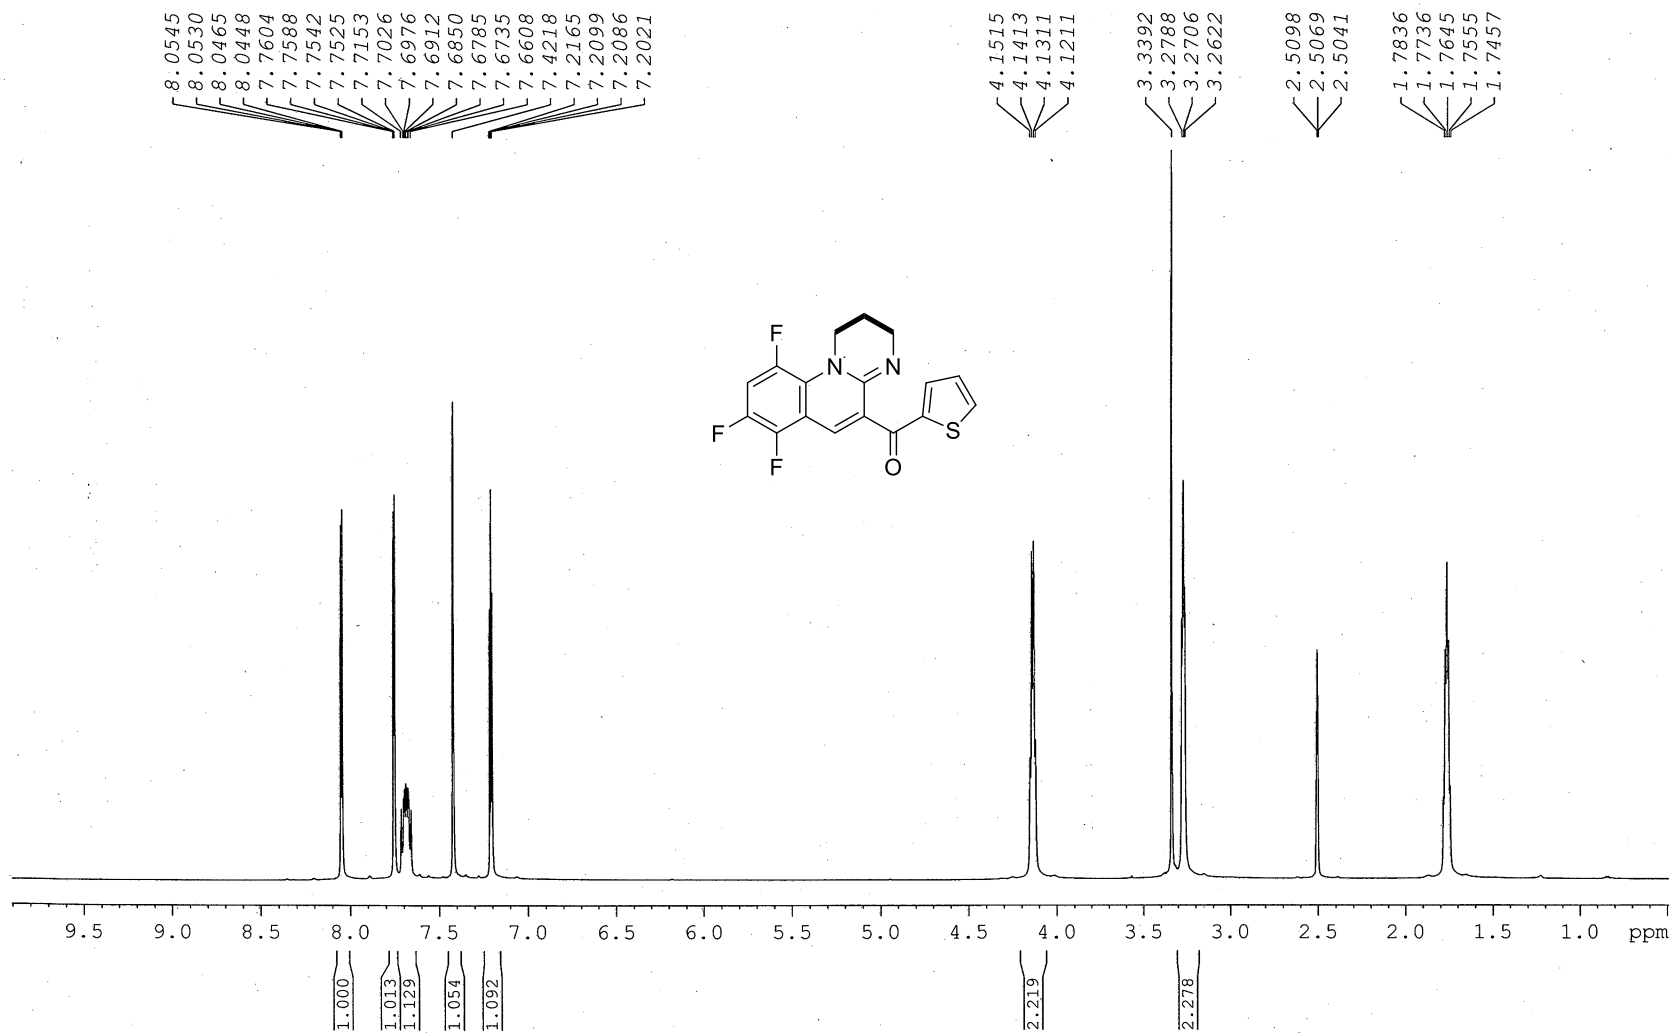

Figure S91. <sup>1</sup>H NMR (600 MHz, DMSO-*d*<sub>6</sub>) spectra of compound 3cn

DEPT135

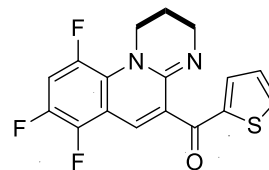

YUNNAN UNIVERSITY ASCEND III 600  
CL-31 in DMSO  
2016042902

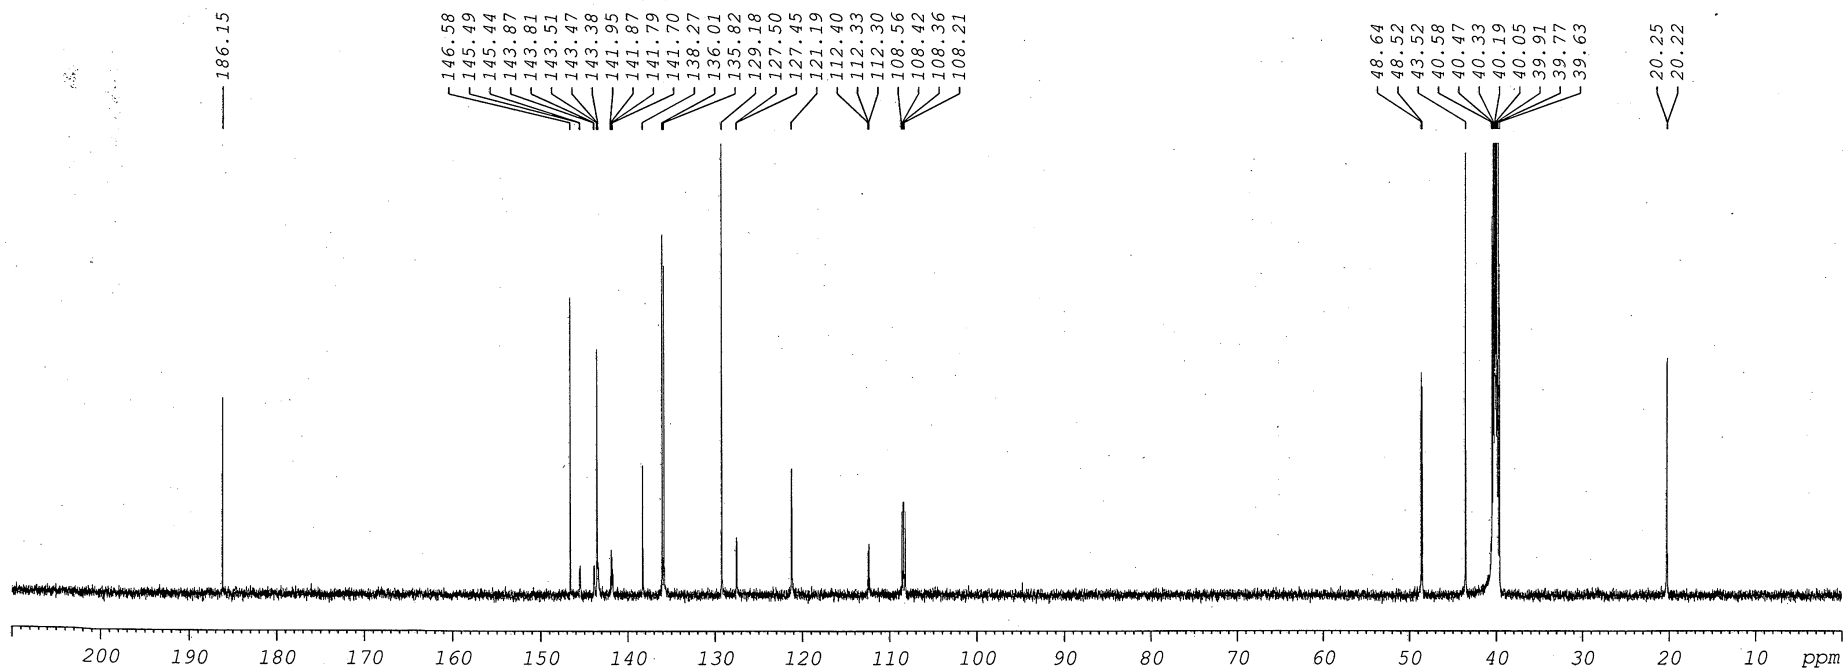

Figure S92.  $^{13}\text{C}$  NMR (150 MHz,  $\text{DMSO-}d_6$ ) spectra of compound **3cn**

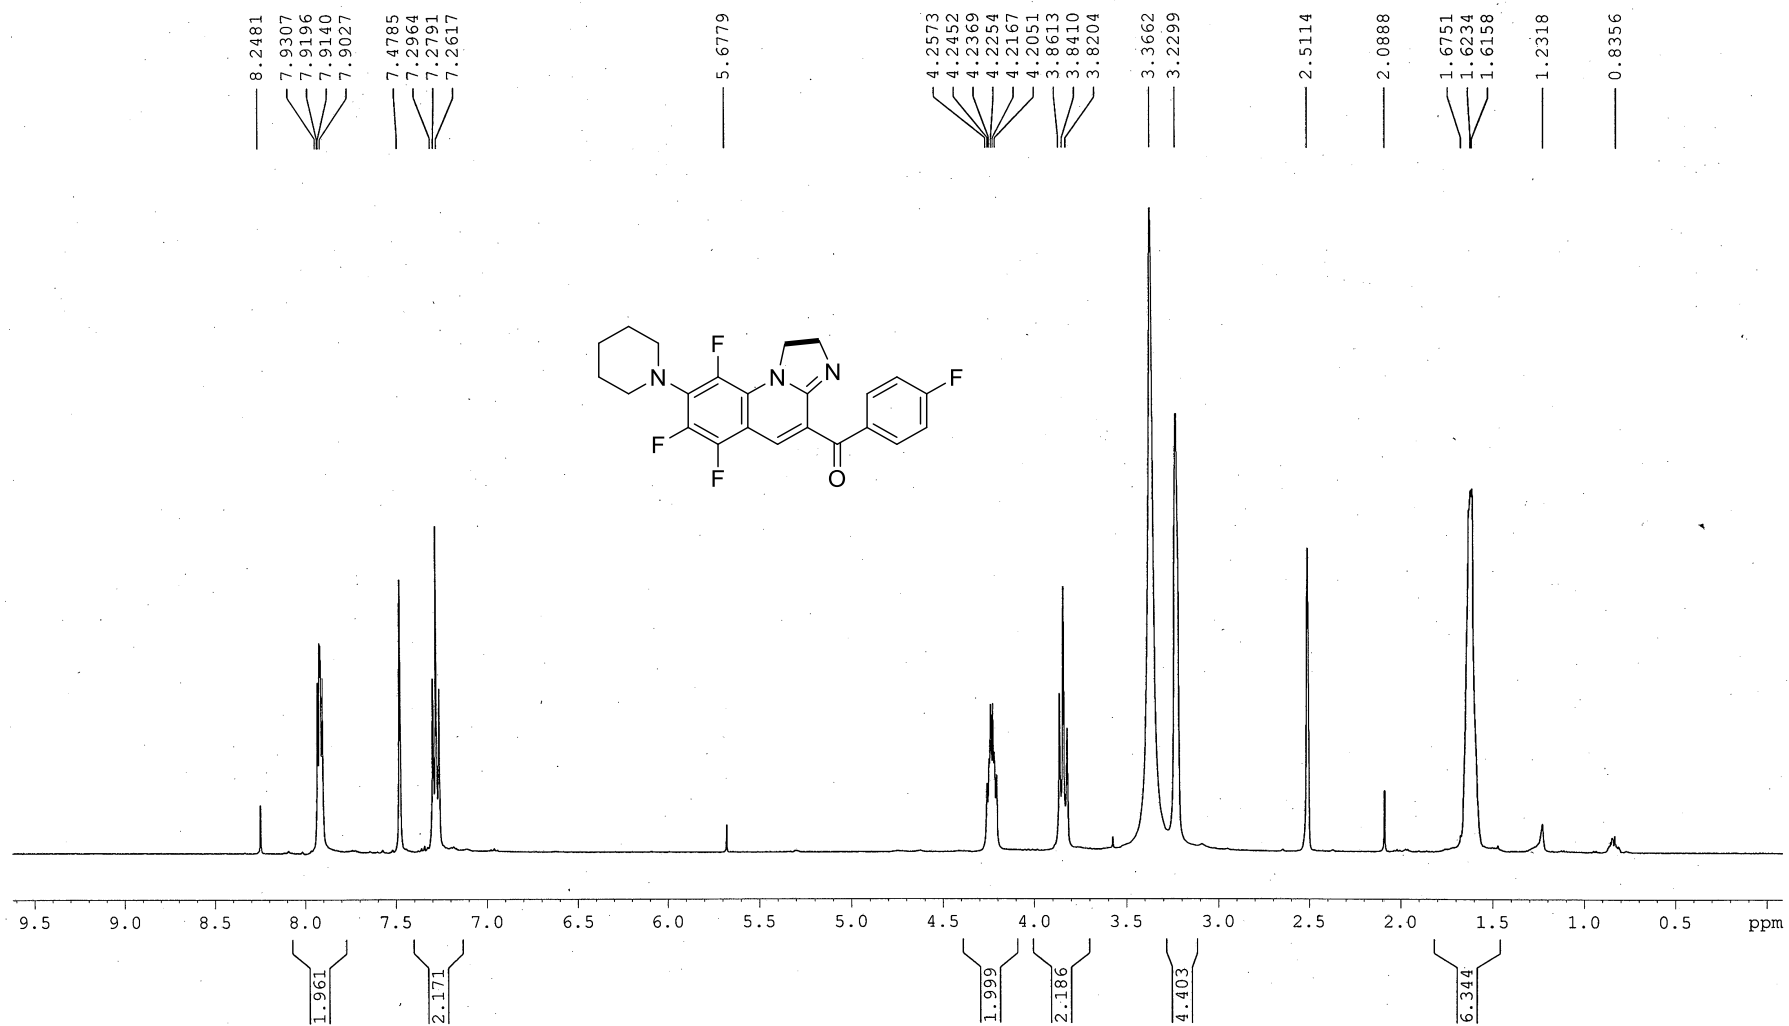

**Figure S93.** <sup>1</sup>H NMR (500 MHz, DMSO-*d*<sub>6</sub> + DCCl<sub>3</sub>) spectra of compound **4da**

DEPT135

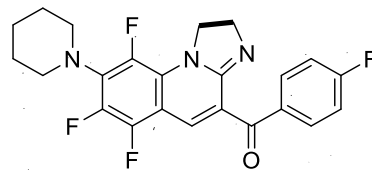

YUNNAN UNIVERSITY AV. DRX 500  
chenliang CL-025 in DMSO  
16040601

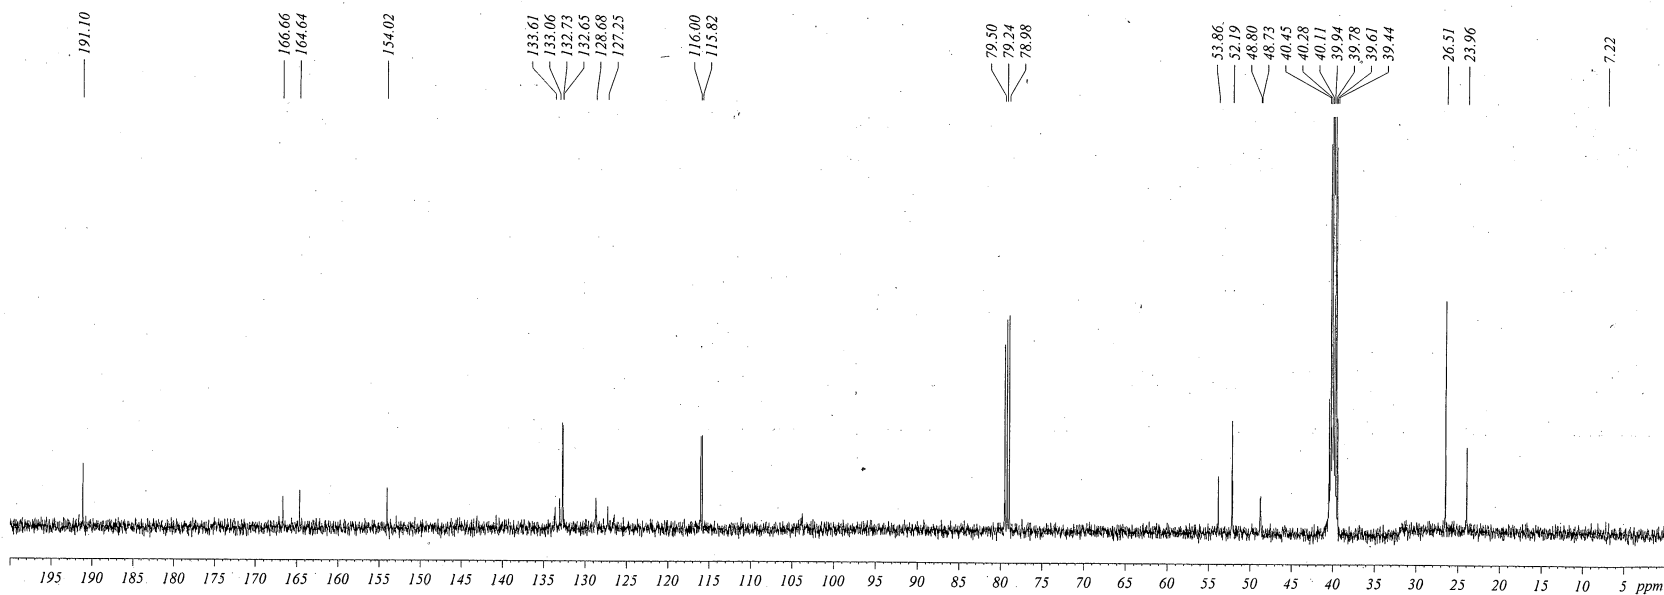

Figure S94.  $^{13}\text{C}$  NMR (125 MHz, DMSO- $d_6$  + DCCl $_3$ ) spectra of compound **4da**

YUNNAN UNIVER. AV. DRX500  
chenliang CL-25 in DMSO  
19F decoupling 16040601

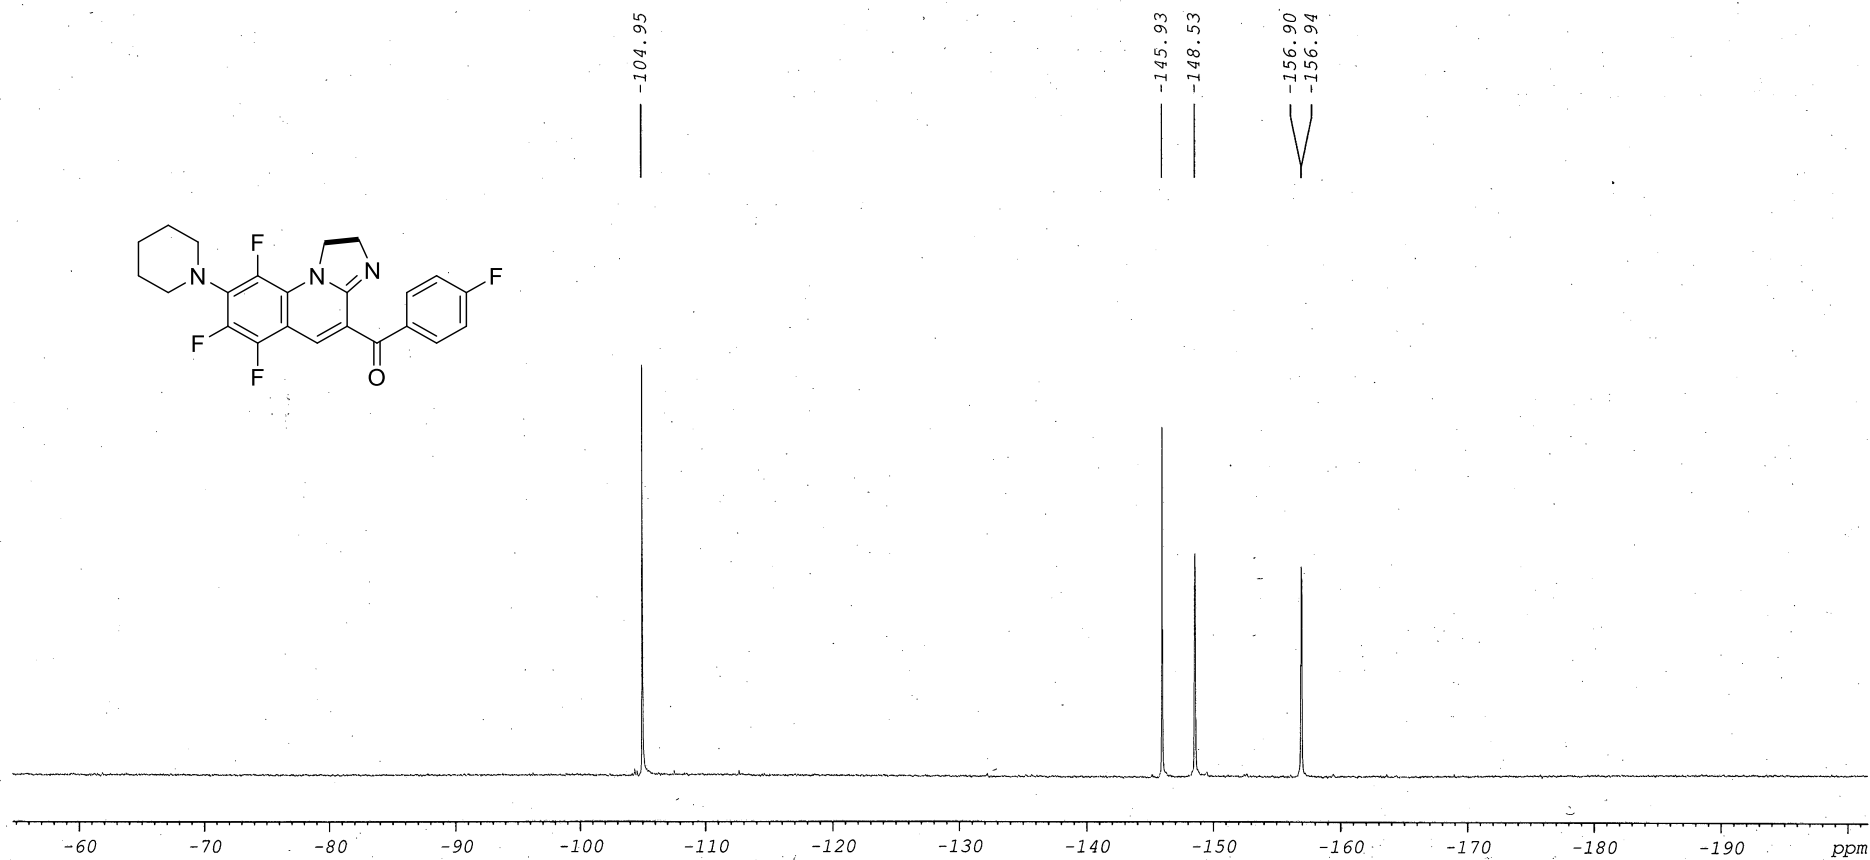

Figure S95.  $^{19}\text{F}$  NMR (471 MHz,  $\text{DMSO-}d_6 + \text{DCCl}_3$ ) spectra of compound **4da**

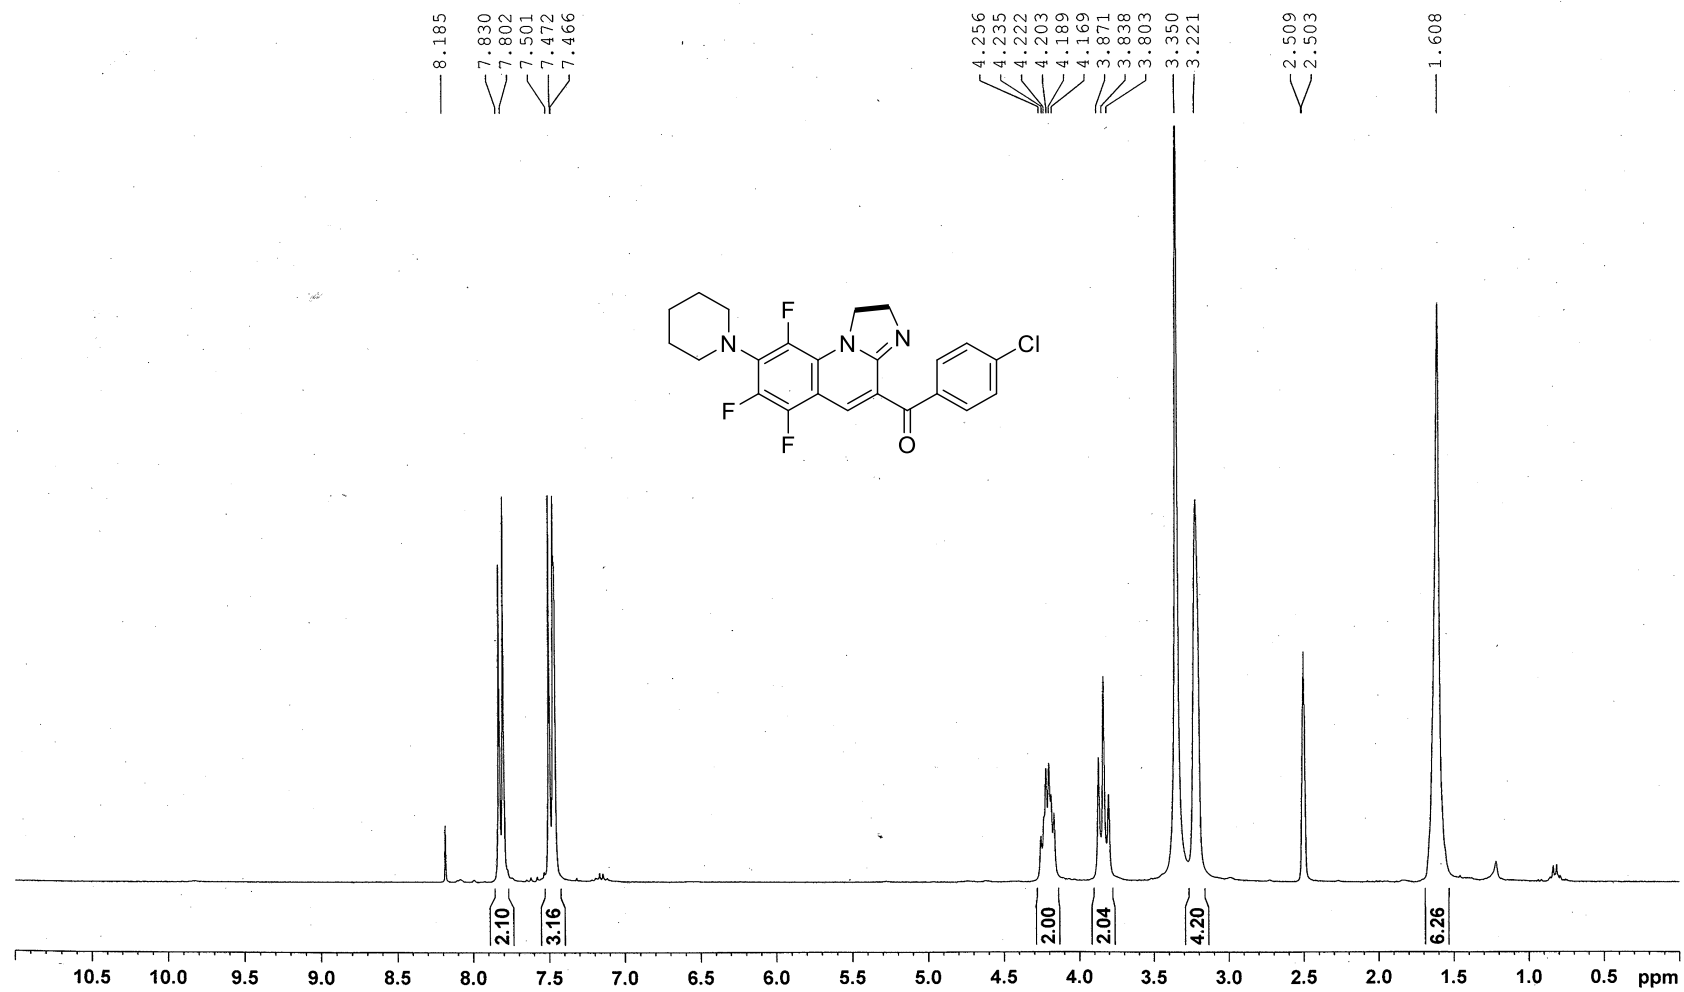

Figure S96.  $^1\text{H NMR}$  (300 MHz,  $\text{DMSO-}d_6 + \text{DCCl}_3$ ) spectra of compound **4db**

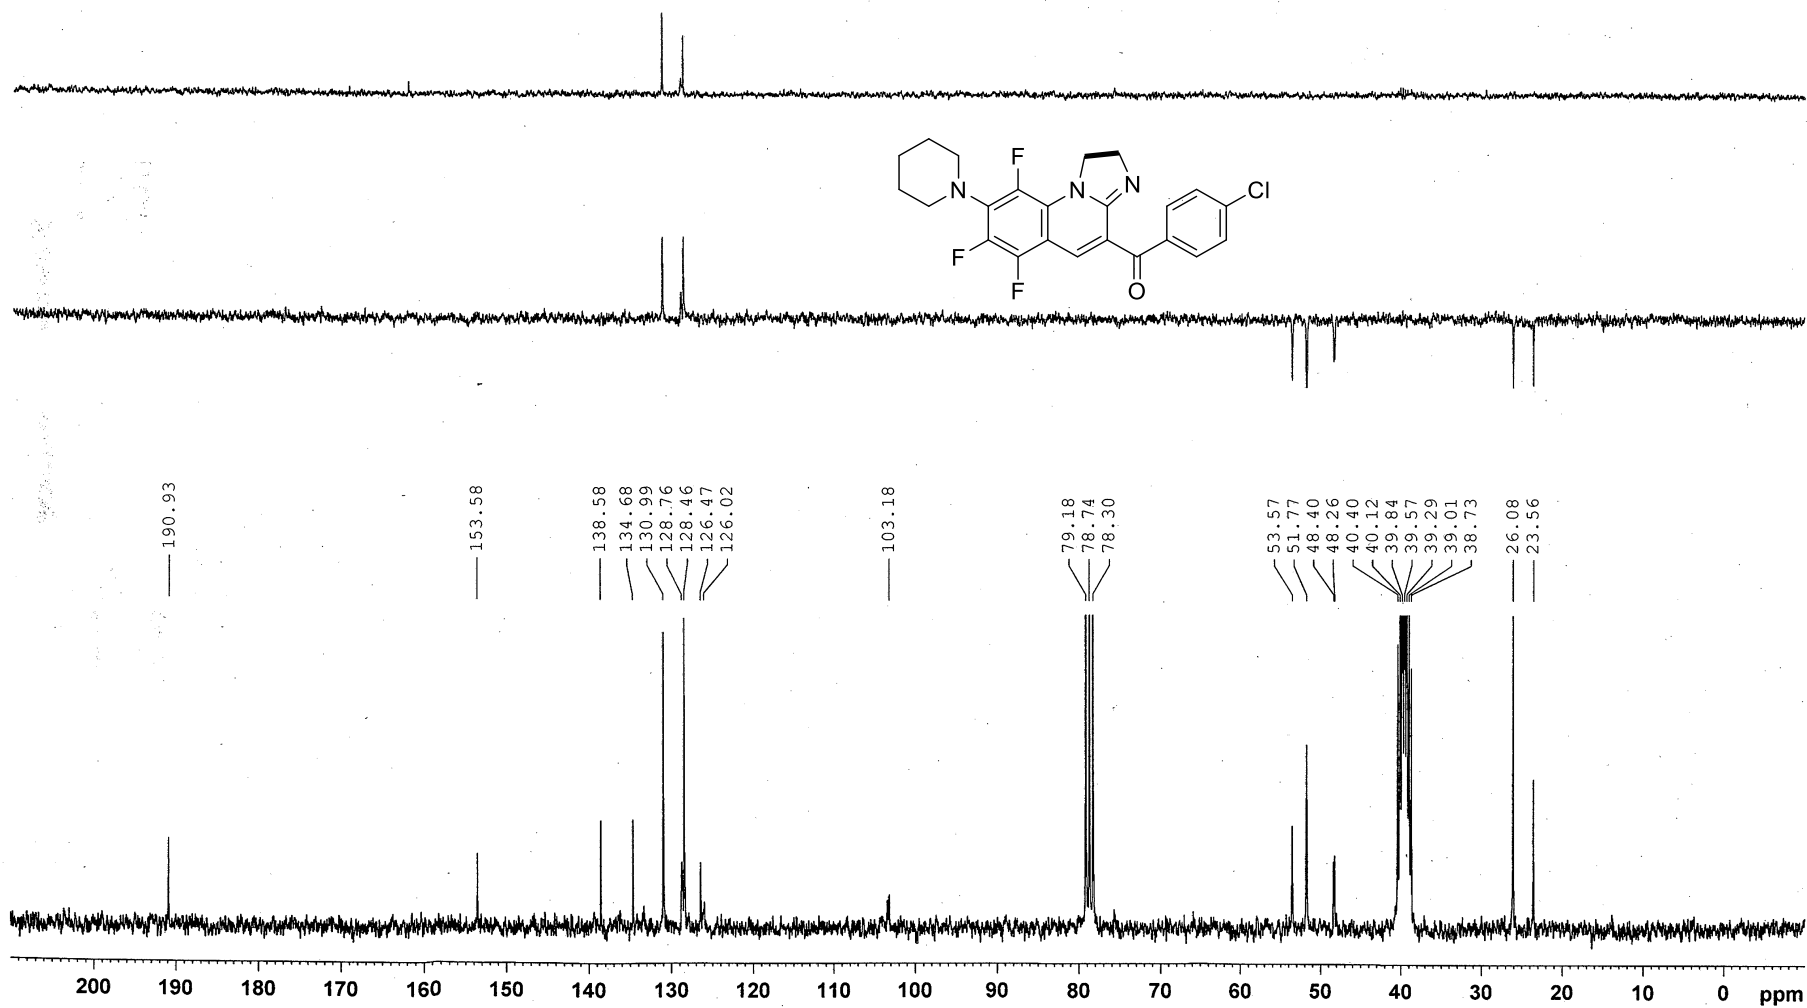

Figure S97.  $^{13}\text{C}$  NMR (75 MHz, DMSO- $d_6$  +  $\text{DCCl}_3$ ) spectra of compound **4db**



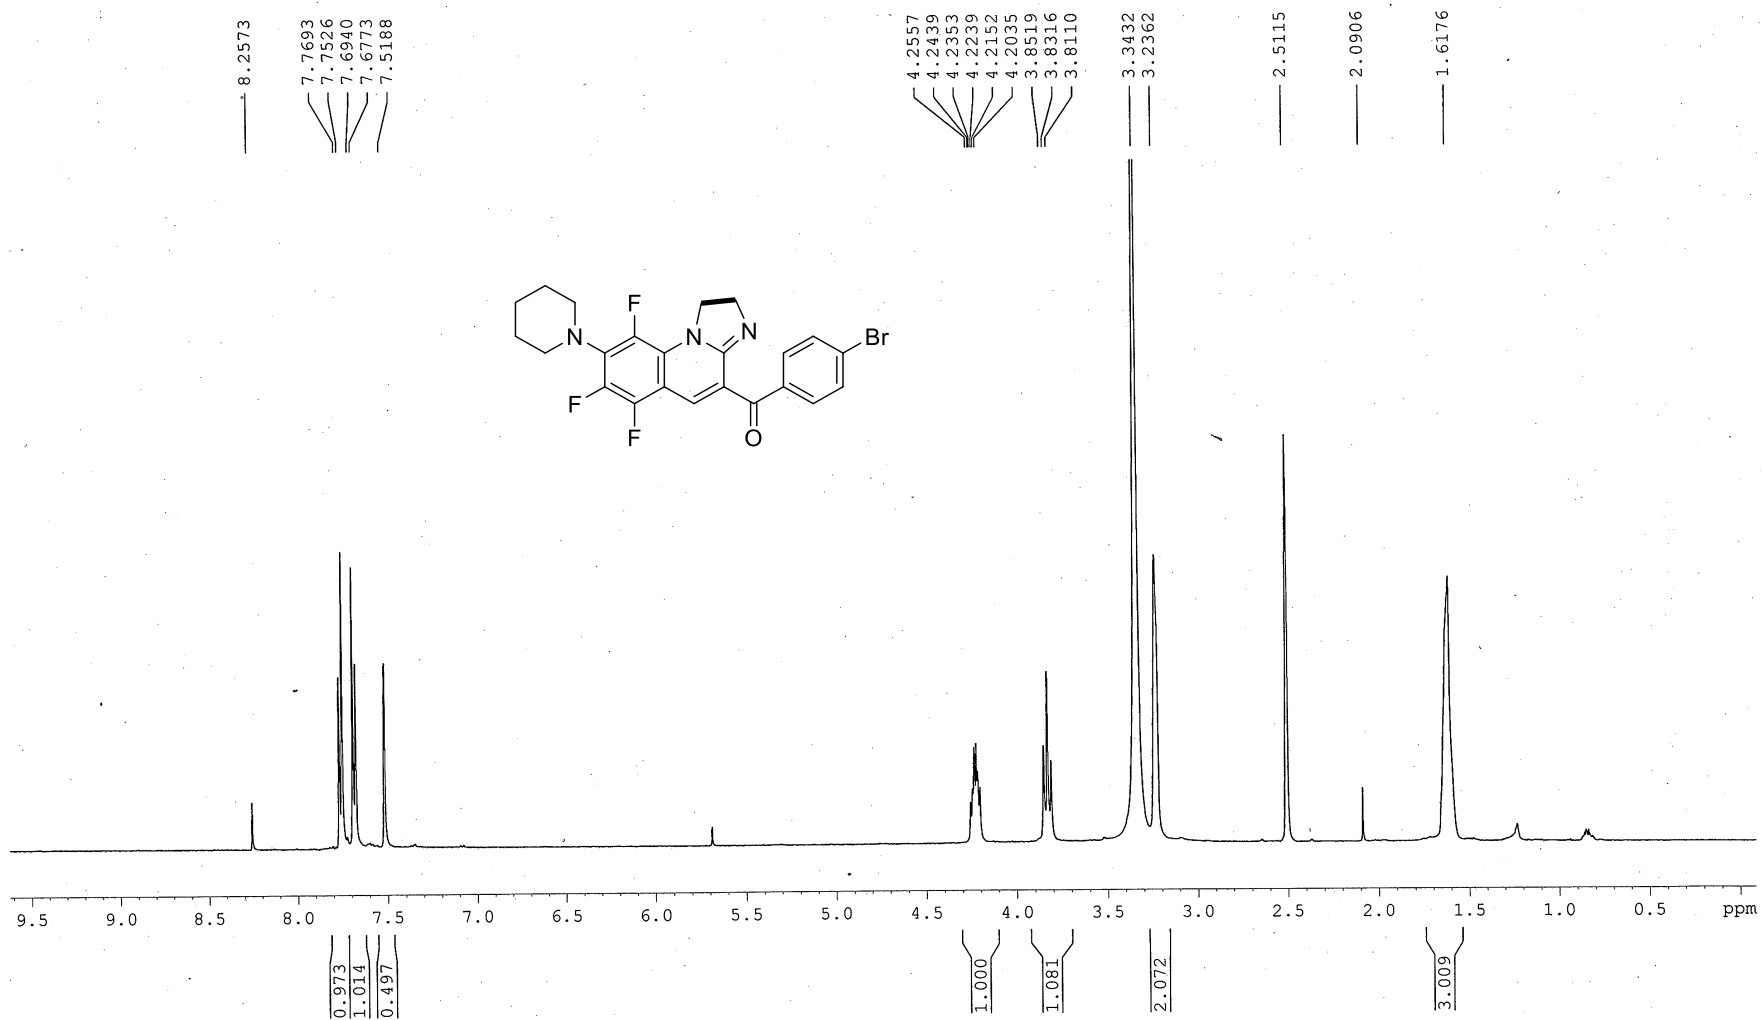

**Figure S98.** <sup>1</sup>H NMR (500 MHz, DMSO-*d*<sub>6</sub> + DCCl<sub>3</sub>) spectra of compound **4dc**

DEPT135

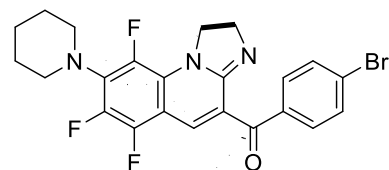

YUNNAN UNIVERSITY ASCEND III 600  
CL-26 in DMSO+CDCl3  
2016042920

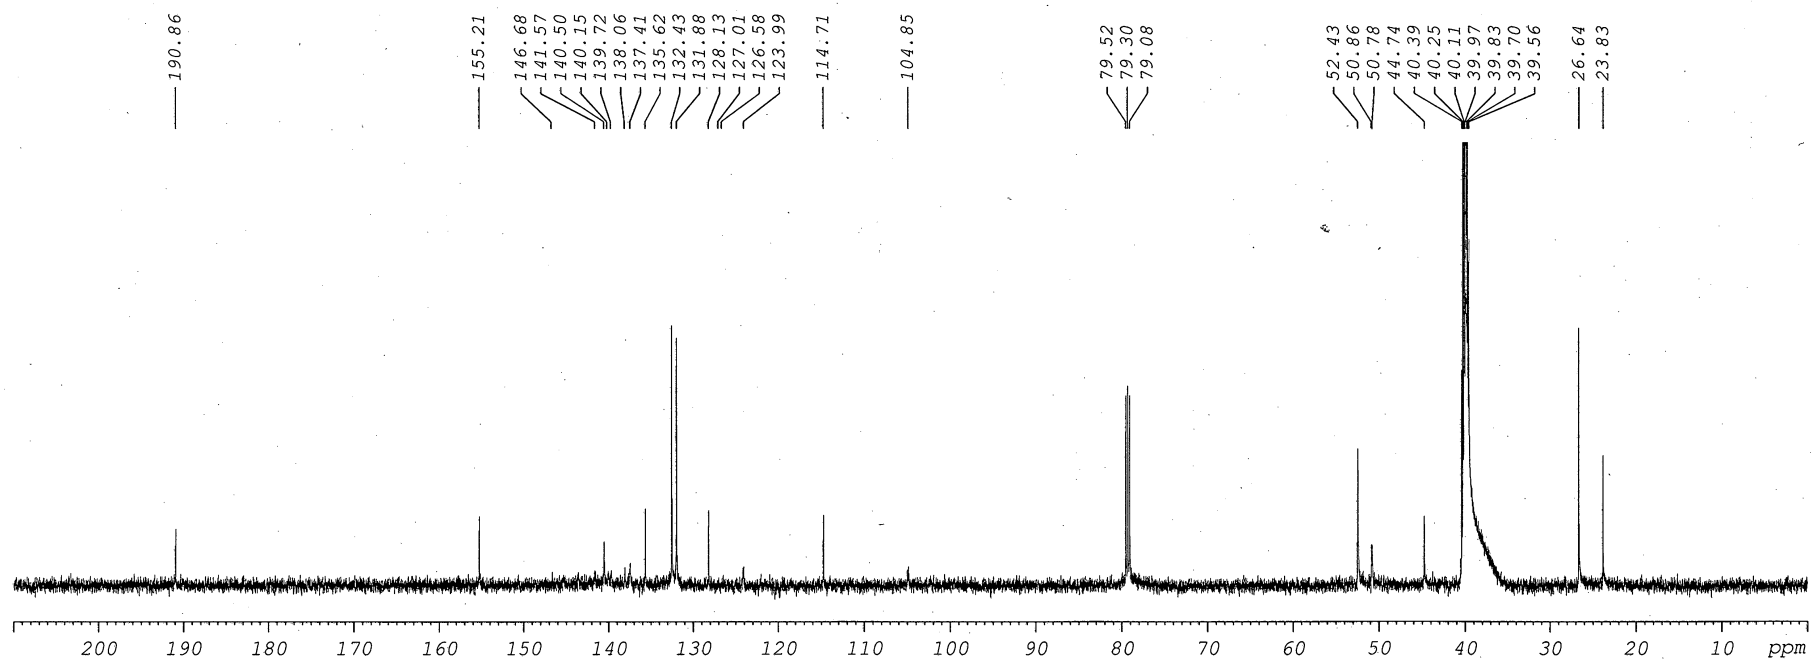

Figure S99. <sup>13</sup>C NMR (150 MHz, DMSO-*d*<sub>6</sub> + DCCl<sub>3</sub>) spectra of compound **4dc**

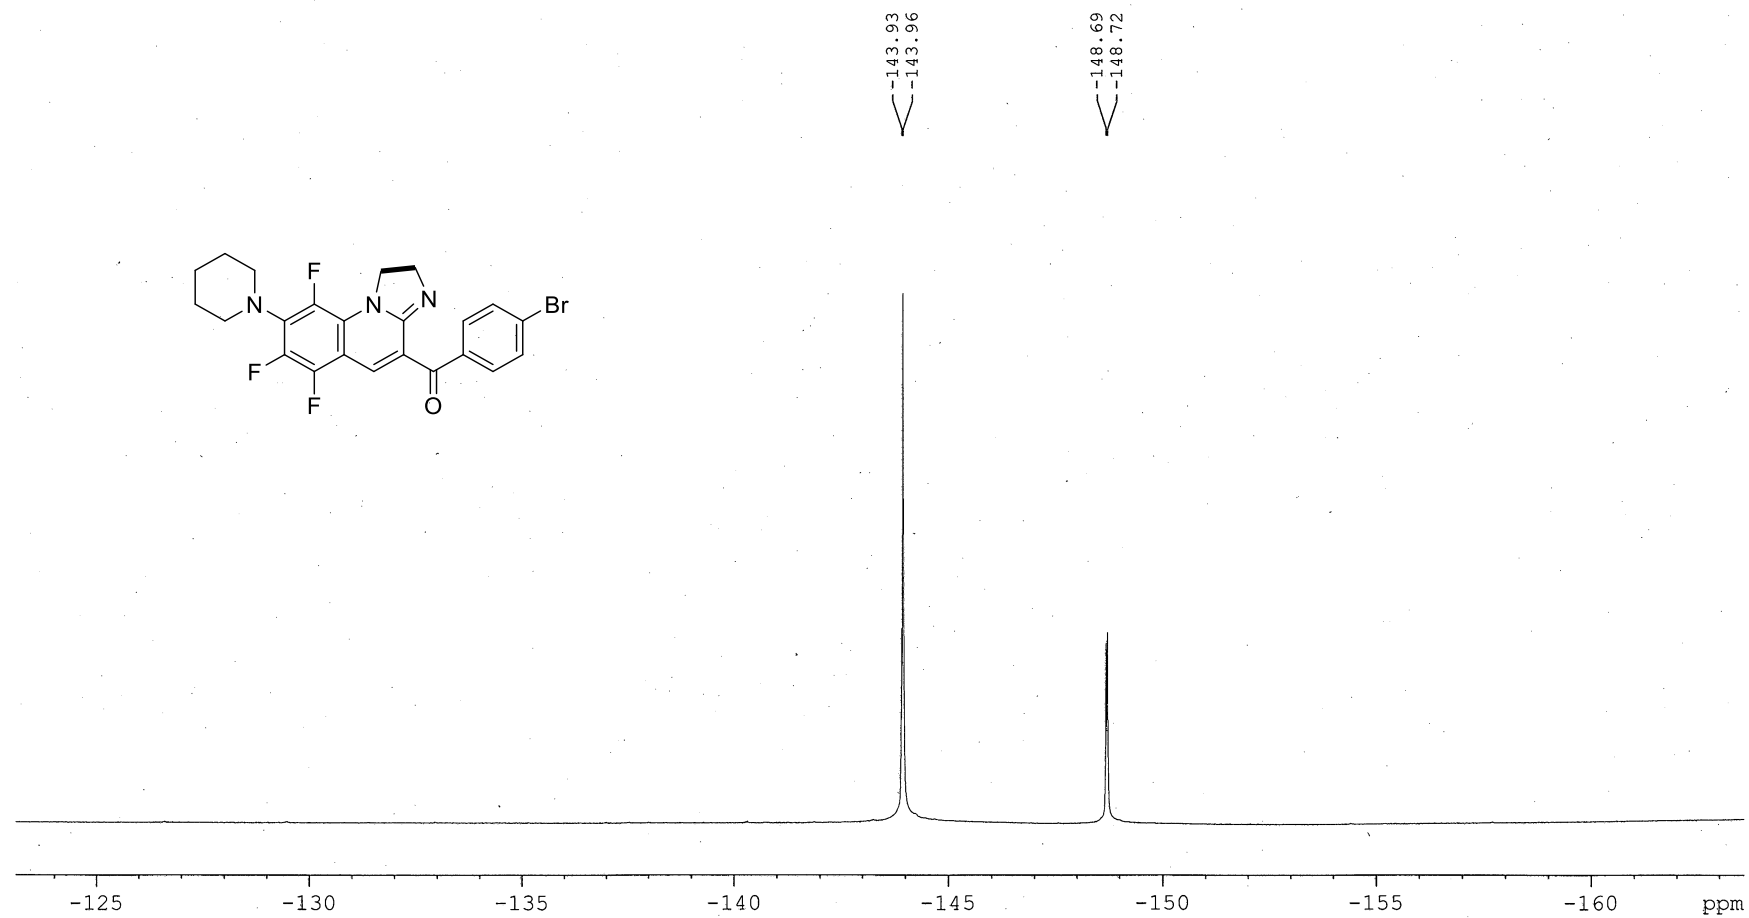

**Figure S100.**  $^{19}\text{F}$  NMR (565 MHz,  $\text{DMSO-}d_6 + \text{DCCl}_3$ ) spectra of compound **4dc**

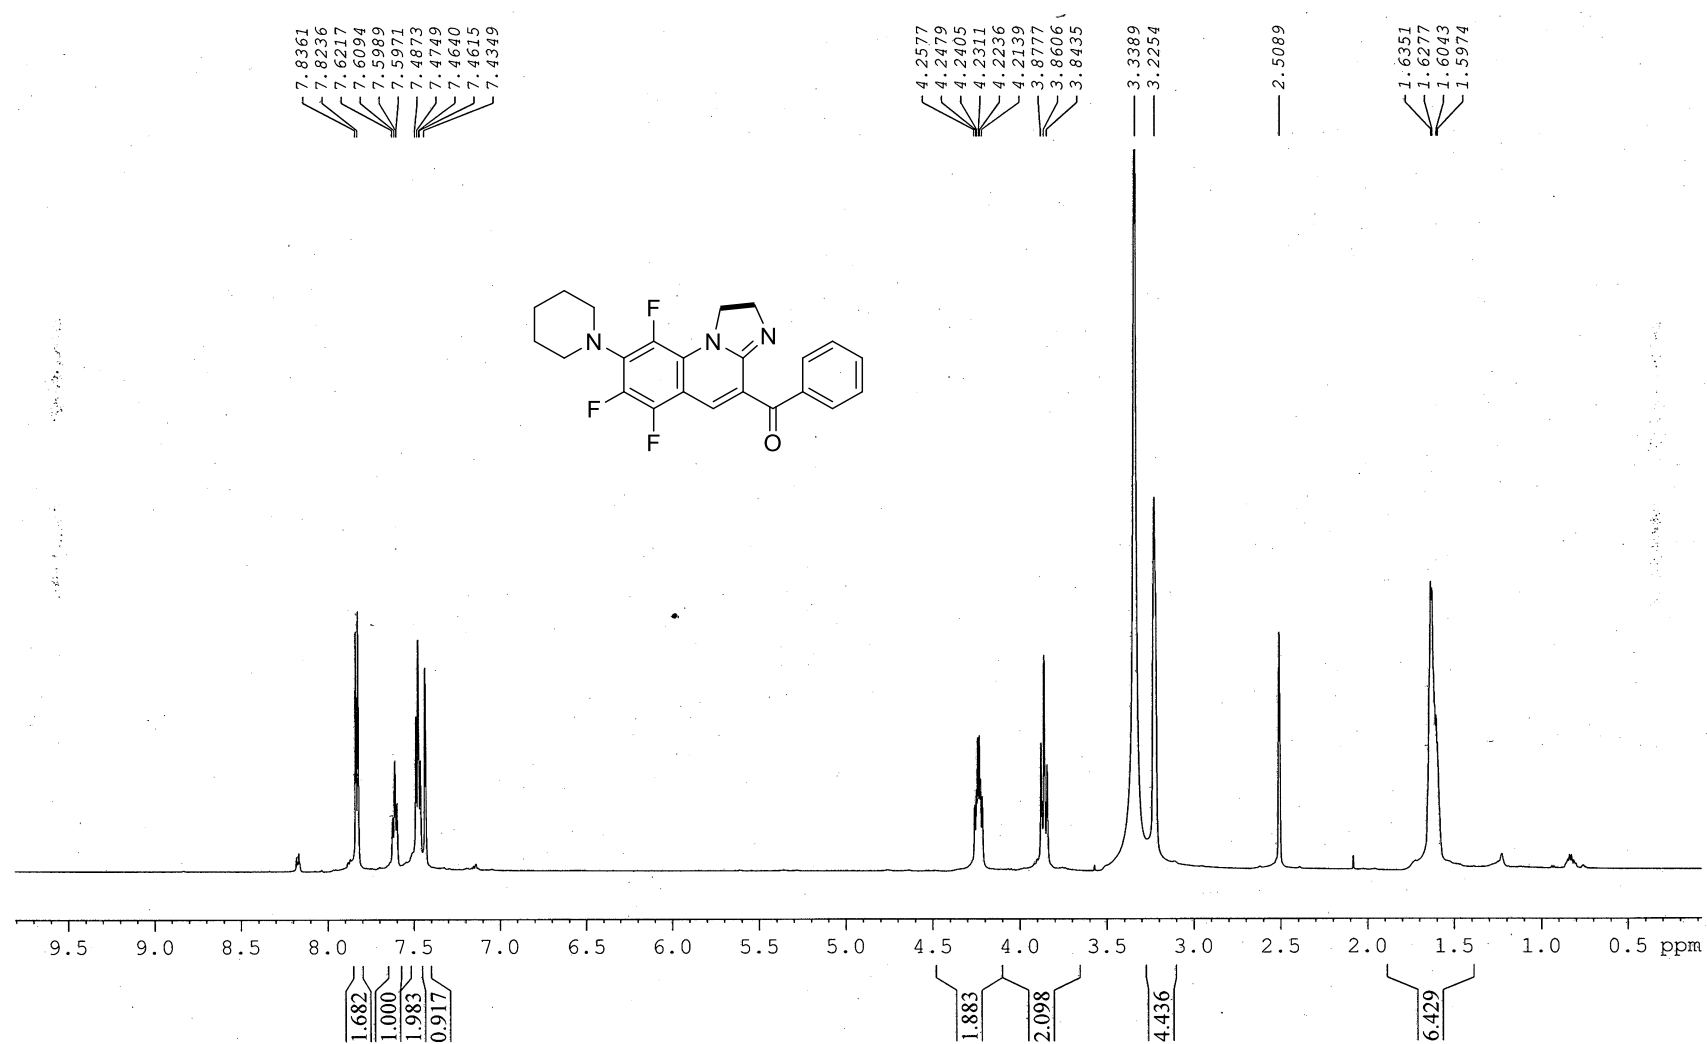

**Figure S101.** <sup>1</sup>H NMR (600 MHz, DMSO-*d*<sub>6</sub>) spectra of compound **4dd**

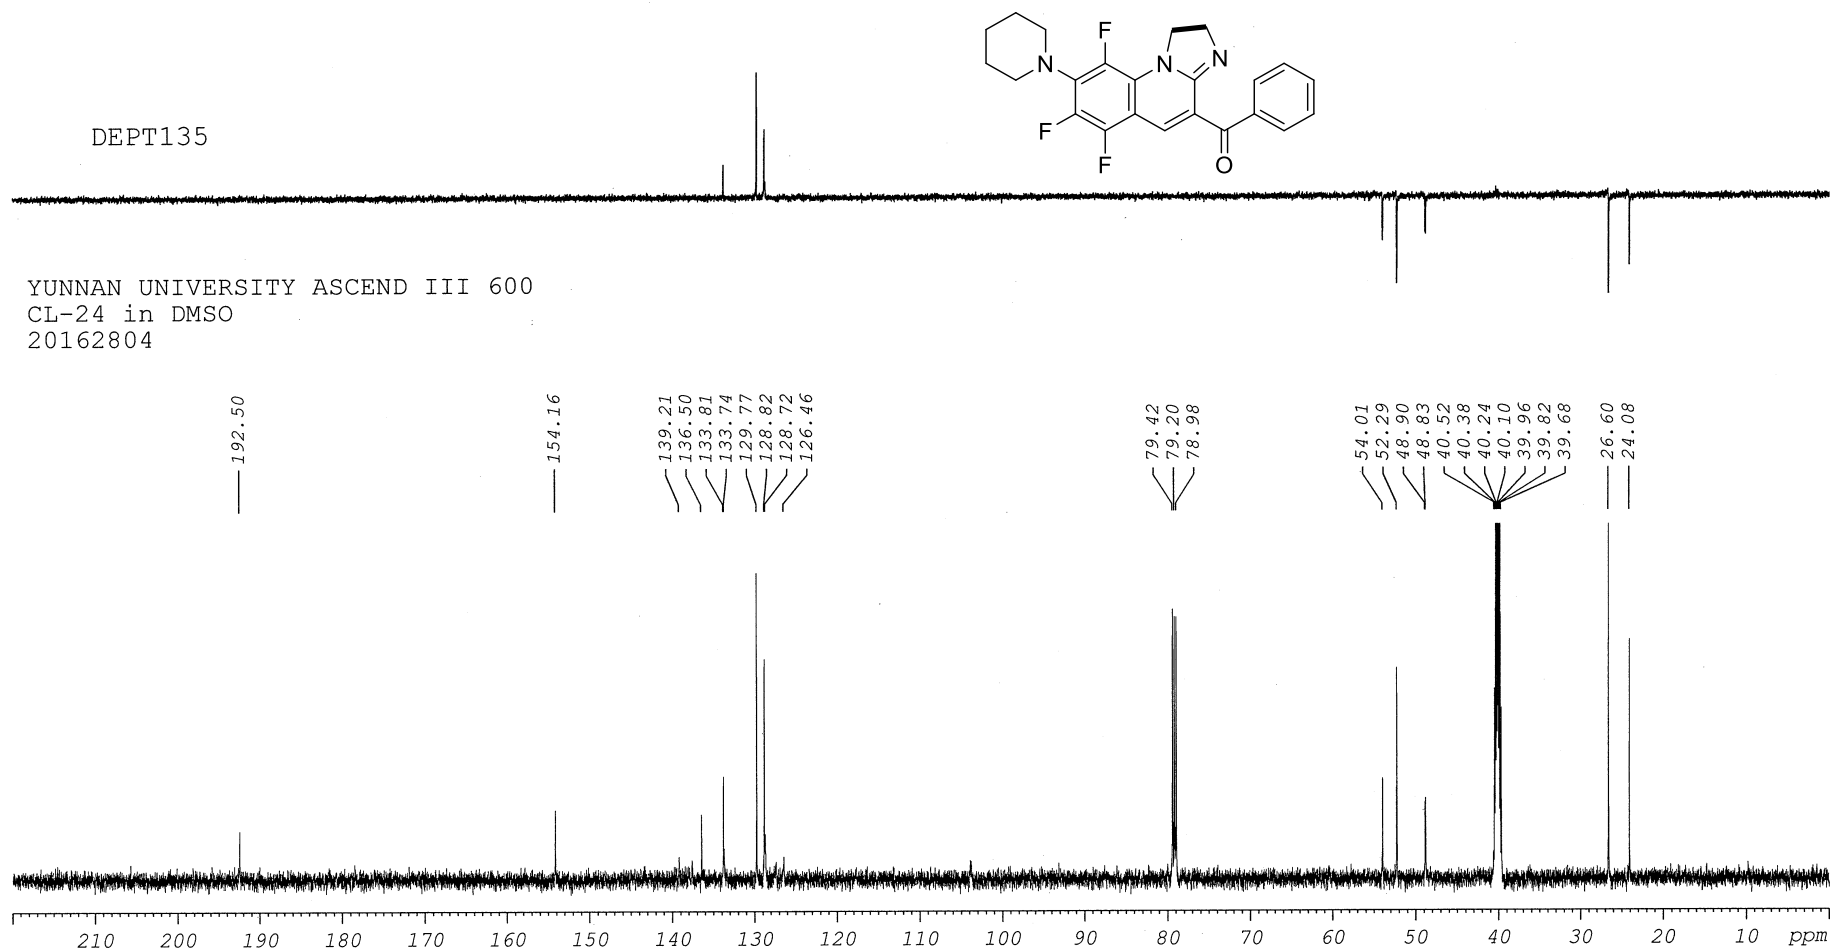

Figure S102.  $^{13}\text{C}$  NMR (150 MHz, DMSO- $d_6$ ) spectra of compound 4dd

YUNNAN UNIVER. AV. DRX500  
chenliang CL-24 in DMSO  
19F decoupling 16042801

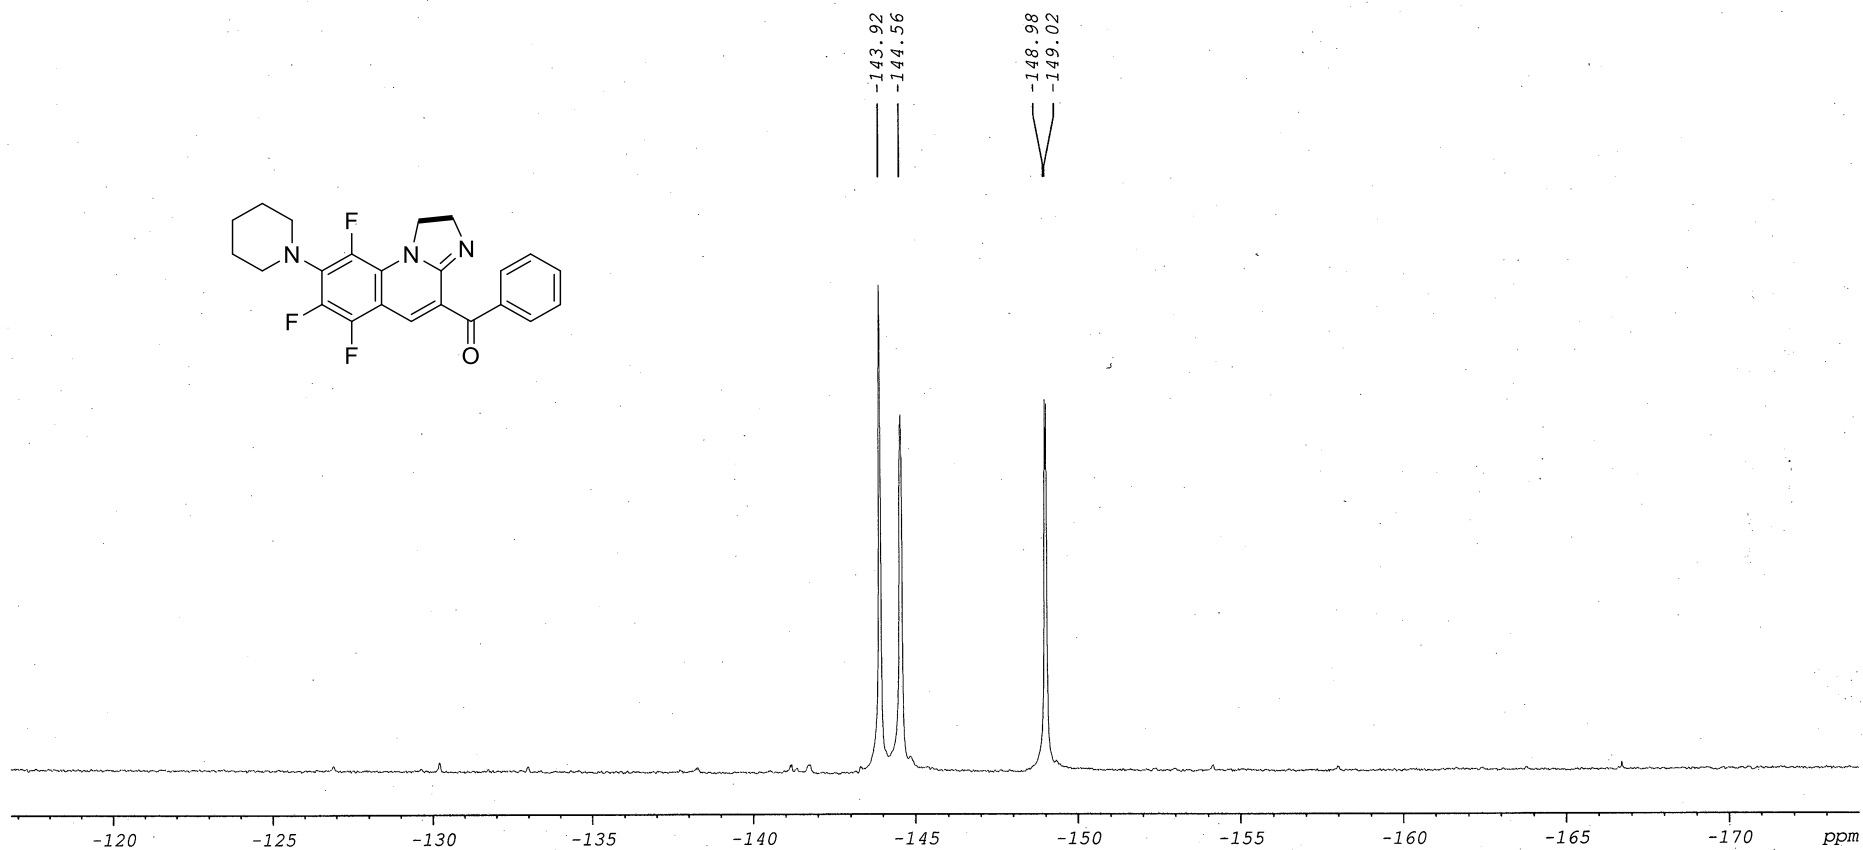

**Figure S103.**  $^{19}\text{F}$  NMR (471 MHz,  $\text{DMSO-}d_6 + \text{DCCl}_3$ ) spectra of compound **4dd**

RT: 0.00 - 2.99

NL:  
3.12E7  
TIC MS  
5HN-01

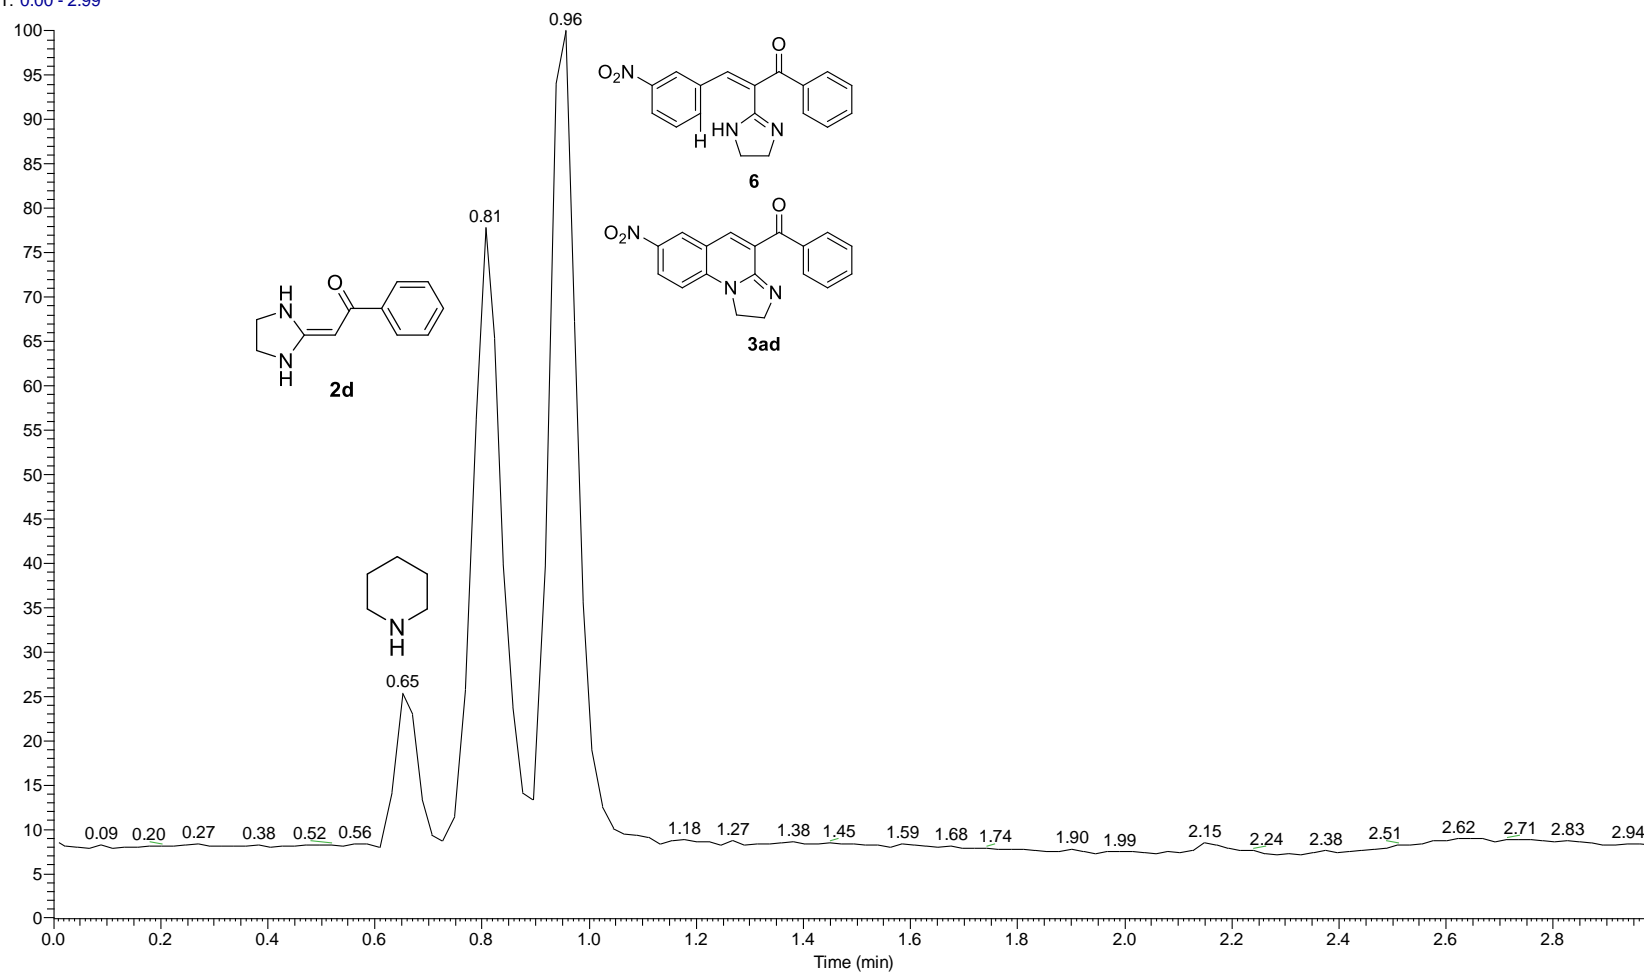

Figure S104. HPLC of intermediate 6

5HN-01 #35 RT: 0.75 AV: 1 NL: 1.11E6  
T: FTMS + c ESI Full ms [50.00-500.00]

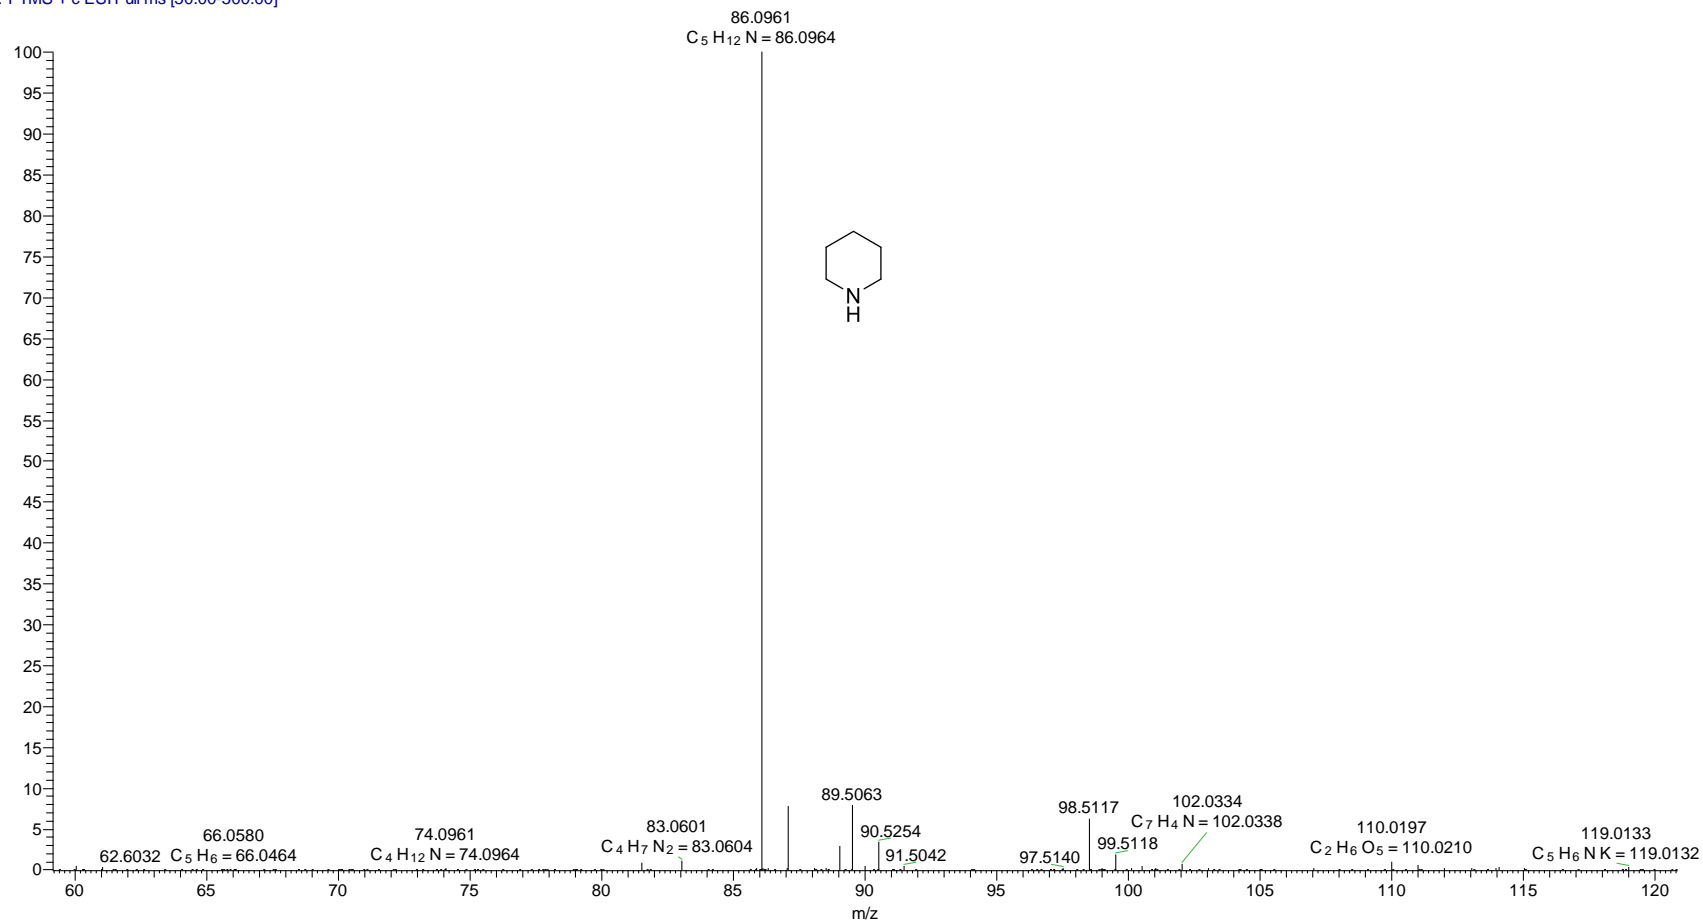

Figure S105. HRMS of piperidine



5HN-01 #38 RT: 0.81 AV: 1 NL: 1.63E7  
T: FTMS + c ESI Full ms [50.00-500.00]

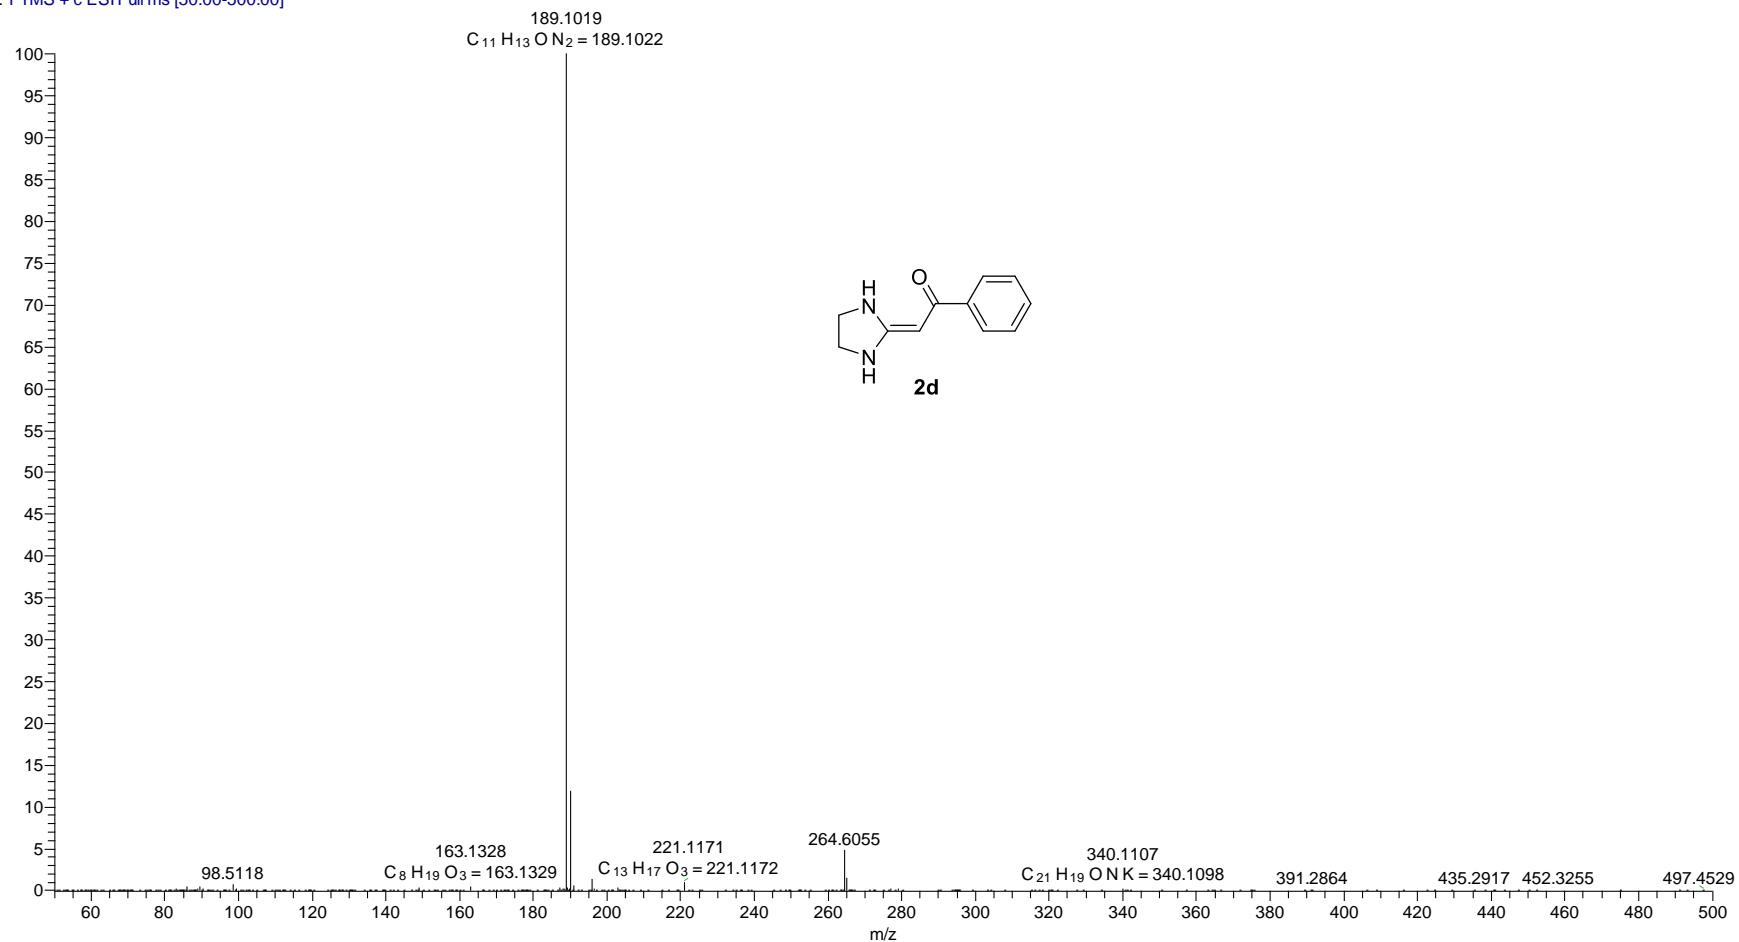

Figure S106. HRMS of compound **2d**

5HN-01 #46 RT: 0.96 AV: 1 NL: 2.34E6  
T: FTMS + c ESI Full ms [50.00-500.00]

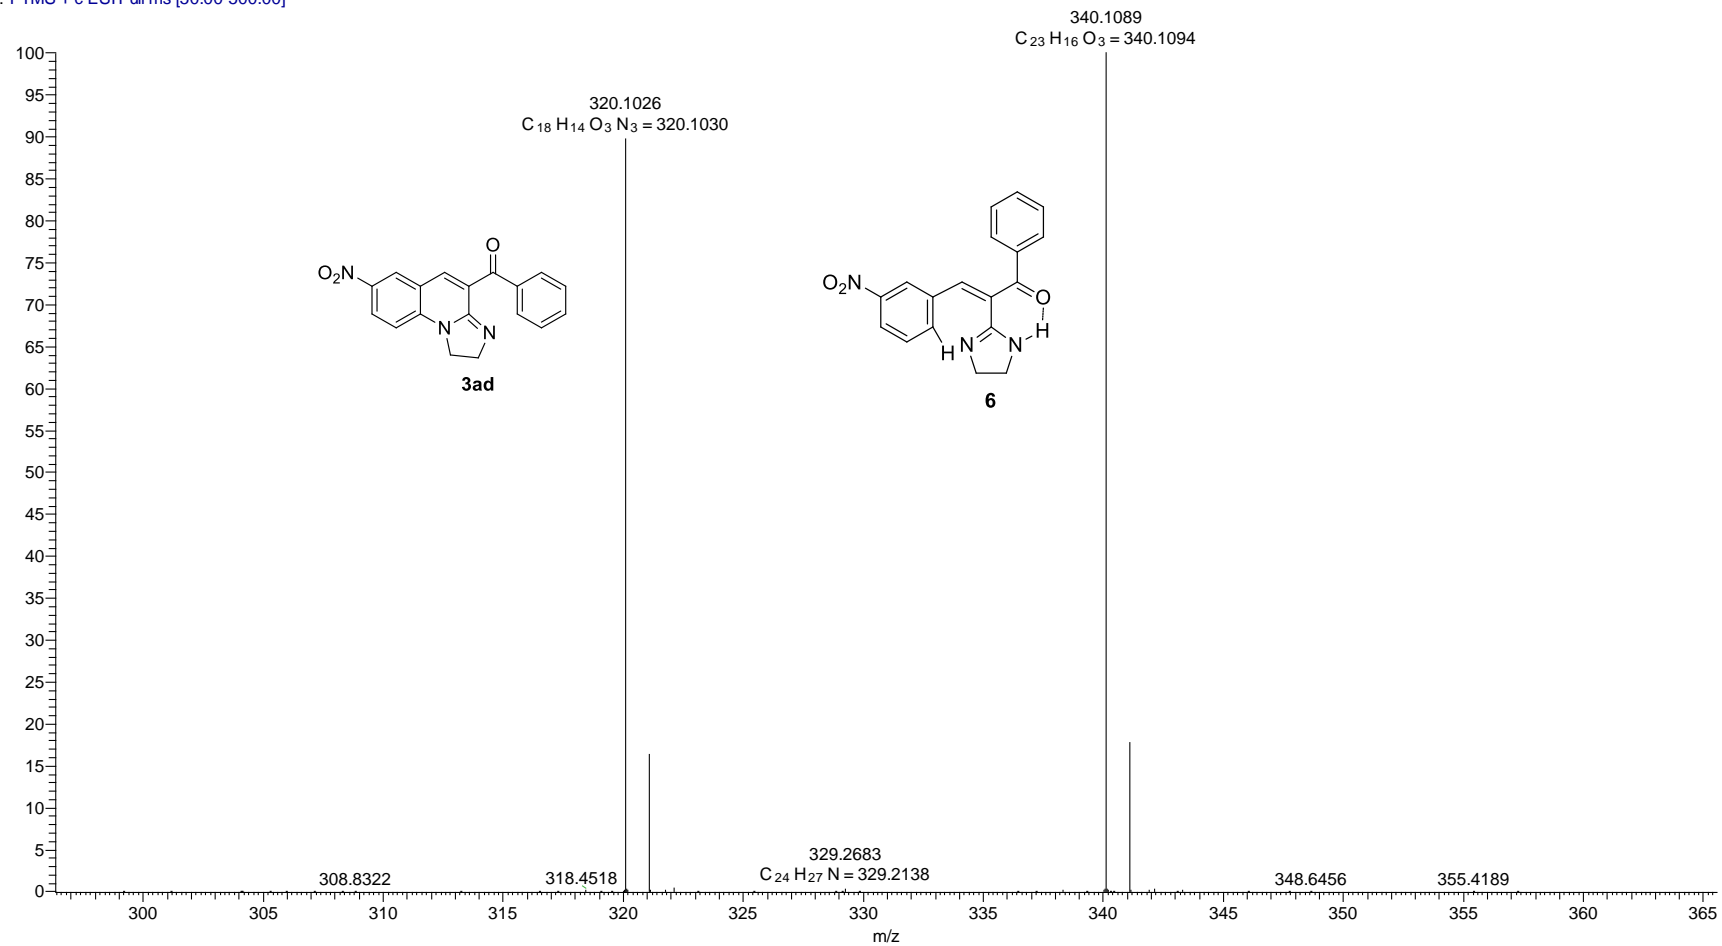

Figure S107. HRMS of intermediate **6**

## References and Notes

1. X.-B. Chen, X.-M. Liu, R. Huang, S.-J. Yan and J. Lin, *Eur. J. Org. Chem.*, 2013, **2013**, 4607-4613.
2. F. Yu, R. Huang, H. Ni, J. Fan, S. Yan and J. Lin, *Green Chem.*, 2013, **15**, 453-462.
3. S.-J. Yan, Y.-J. Liu, Y.-L. Chen, L. Liu and J. Lin, *Bioorg. Med. Chem. Lett.*, 2010, **20**, 5225-5228
4. CCDC 1587141 contains the supplementary crystallographic data for compound **3bf**. These data can be obtained free of charge from The Cambridge Crystallographic Data Center via [www.ccdc.cam.ac.uk/data\\_request/cif](http://www.ccdc.cam.ac.uk/data_request/cif).
